# Supplementary material for: Automated Sample Preparation and Data Collection Workflow for High-Throughput In Vitro Metabolomics
Source: MDPI journal article supplement (doi:10.3390/metabo12010052), 2022-01-08
Supplement: s1 [file s1]

Supplementary material for

# Automated Sample Preparation and Data Collection Workflow for High-Throughput In Vitro Metabolomics

Julia M. Malinowska <sup>1,\*</sup>, Taina Palosaari <sup>2</sup>, Jukka Sund <sup>2</sup>, Donatella Carpi <sup>2</sup>, Gavin R. Lloyd <sup>3</sup>, Ralf J.M. Weber <sup>1,3</sup>, Maurice Whelan <sup>2</sup> and Mark R. Viant <sup>1,3,\*</sup>

<sup>1</sup> School of Biosciences, University of Birmingham, Birmingham B15 2TT, UK; R.J.Weber@bham.ac.uk (R.J.M.W.)

<sup>2</sup> European Commission, Joint Research Centre (JRC), 21027 Ispra, Italy; Taina.PALOSAARI@ec.europa.eu (T.P.); Jukka.SUND@ec.europa.eu (J.S.); Donatella.CARPI@ec.europa.eu (D.C.); Maurice.WHELAN@ec.europa.eu (M.W.)

<sup>3</sup> Phenome Centre Birmingham, University of Birmingham, Birmingham B15 2TT, UK; G.R.Lloyd@bham.ac.uk (G.R.L.)

\* Correspondence: jmm732@bham.ac.uk (J.M.M.); m.viant@bham.ac.uk (M.R.V.)

## Contents

|                                                                                                                                                                                                                                                               |    |
|---------------------------------------------------------------------------------------------------------------------------------------------------------------------------------------------------------------------------------------------------------------|----|
| <b>Supplementary results</b> .....                                                                                                                                                                                                                            | 3  |
| <b>Table S1.</b> Assessment of the effect of well location during the culturing and extraction procedure (wells located at the edges or centre of a 96-well microplate).....                                                                                  | 3  |
| <b>Figure S1.</b> PCA score plots of the intrastudy QCs (from 5 analytical batches, collected over ~7 days), and biological control samples (the latter corresponding to a 24-h sampling time point).....                                                     | 4  |
| <b>Supplementary methods</b> .....                                                                                                                                                                                                                            | 5  |
| <b>Table S2.</b> Settings of data acquisition employed for the assessment of automated sample preparation workflow for metabolomics.....                                                                                                                      | 5  |
| <b>Figure S2.</b> The design of the deck of Biomek i7 Hybrid Workstation customised for in vitro metabolomics experiments .....                                                                                                                               | 7  |
| <b>Figure S3.</b> The photo of the deck of Biomek i7 Hybrid Workstation customised for in vitro metabolomics experiments .....                                                                                                                                | 7  |
| <b>Figure S4.</b> Experimental design for the high-throughput metabolomics study shown for one nESI-DIMS assay .....                                                                                                                                          | 8  |
| <b>Figure S5.</b> The experimental design outlining the generation of extraction blanks and intrastudy QC samples for the high-throughput metabolomics study.....                                                                                             | 9  |
| <b>Figure S6.</b> High-throughput metabolomics workflow providing an overview of the process of sample extraction, resuspension and analysis for nESI-DIMS assays using 96-well (for culturing and extractions) and 384-well (for nESI-DIMS) microplates..... | 10 |

### Supplementary results

**Table S1.** Assessment of the effect of well location during the culturing and extraction procedure (wells located at the edges or centre of a 96-well microplate) for each study 96-well microplate using Welch's t-test ( $p$ -value threshold 0.05, correction for FDR applied using the Benjamini-Hochberg procedure) and fold change calculations (absolute value > 1.2) across three nESI-DIMS assays. For each study 96-well microplate, a feature had to be present in at least three samples per group to apply the statistical analysis. P(+), P(-), L(+) correspond to polar positive, polar negative and lipid positive nESI-DIMS assays.

| Assay | 96-well microplate | Features outside the threshold | Total biological feature count for the study 96-well microplate | Percentage (%) of features outside the threshold |
|-------|--------------------|--------------------------------|-----------------------------------------------------------------|--------------------------------------------------|
| P(+)  | TP 1a              | 0                              | 2328                                                            | 0.0                                              |
|       | TP 1b              | 0                              | 2326                                                            | 0.0                                              |
|       | TP 2a              | 167                            | 2327                                                            | 7.2                                              |
|       | TP 2b              | 13                             | 2258                                                            | 0.6                                              |
|       | TP 3a              | 0                              | 2329                                                            | 0.0                                              |
| P(-)  | TP 1a              | 0                              | 4768                                                            | 0.0                                              |
|       | TP 1b              | 0                              | 4743                                                            | 0.0                                              |
|       | TP 2a              | 2                              | 4781                                                            | 0.0                                              |
|       | TP 2b              | 0                              | 4776                                                            | 0.0                                              |
|       | TP 3a              | 0                              | 4661                                                            | 0.0                                              |
| L(+)  | TP 1a              | 0                              | 3787                                                            | 0.0                                              |
|       | TP 1b              | 0                              | 3777                                                            | 0.0                                              |
|       | TP 3a              | 0                              | 3788                                                            | 0.0                                              |

Class      ● Replicate 1      ● Replicate 2      ● Replicate 3      ● Intrastudy QCs

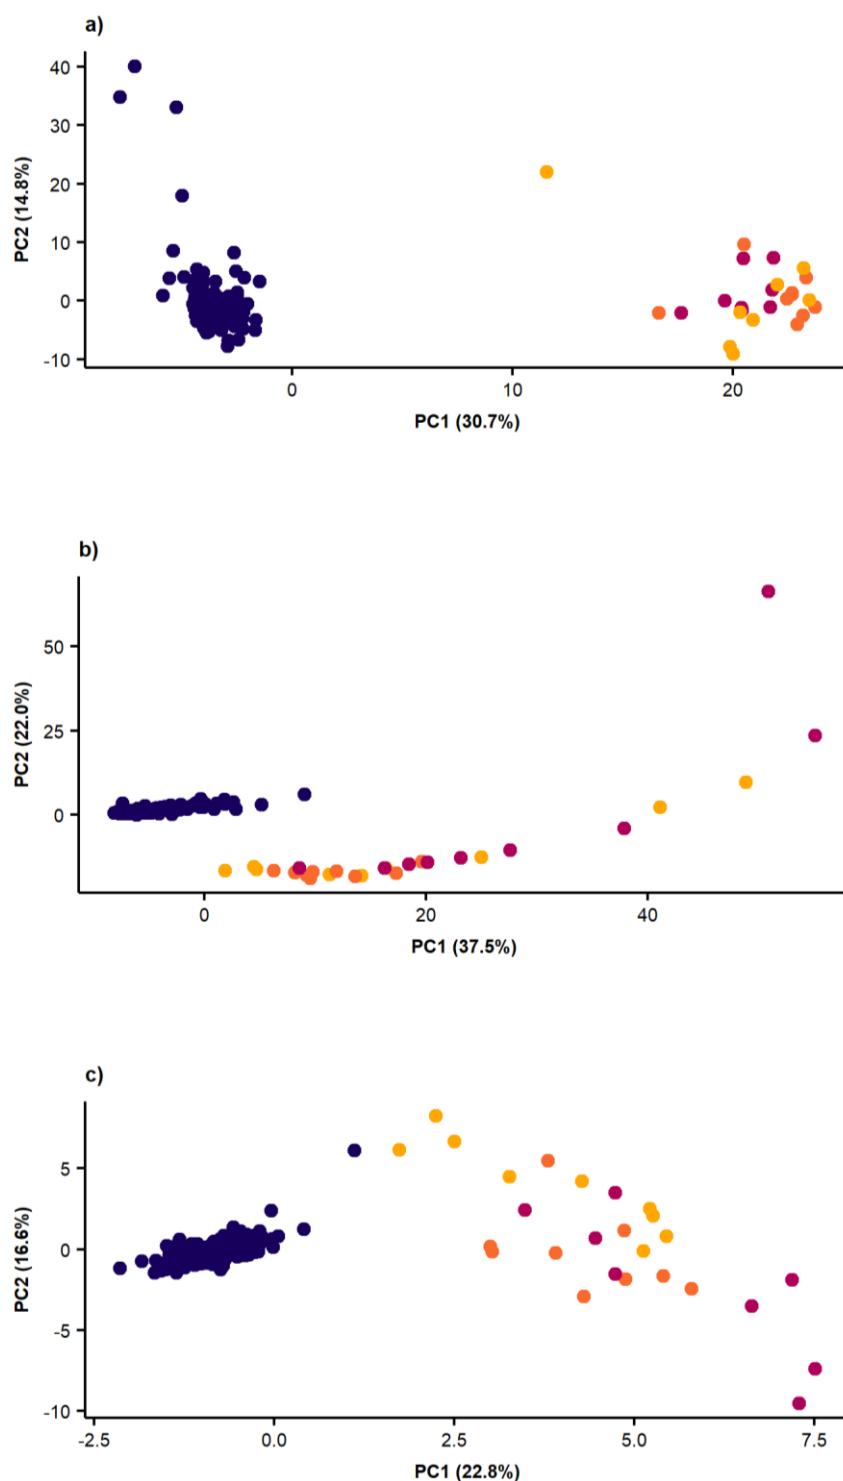

**Figure S1.** PCA score plots of the intrastudy QCs (from 5 analytical batches, collected over ~7 days), and biological control samples (the latter corresponding to a 24-h sampling time point) for a) polar positive, b) polar negative, and c) lipid positive nESI-DIMS assays from the high-throughput metabolomics study. Biological replicates 1-3 correspond to the cell samples cultured on three separate 96-well microplates across weeks 1-3.

### Supplementary methods

**Table S2.** Settings of data acquisition employed for the assessment of automated sample preparation workflow for in vitro metabolomics acquired with spectral-stitching nESI-DIMS using an Orbitrap Elite mass spectrometer (Thermo Scientific) coupled to a chip-based nESI ionisation platform (TriVersa NanoMate, Advion, Ithaca, USA) for the analysis of polar metabolites in positive and negative ionisation modes as well as lipids in positive ionisation mode.

| Instrument        | Settings                        | Assay             |                   |                   |
|-------------------|---------------------------------|-------------------|-------------------|-------------------|
|                   |                                 | Polar positive    | Polar negative    | Lipid positive    |
| TriVersa NanoMate | Infusion volume (μL)            | 10                | 10                | 10                |
|                   | Aspirate after sample           | Yes               | Yes               | Yes               |
|                   | Return unused sample to tray    | No                | No                | No                |
|                   | Vent headspace                  | Yes               | Yes               | Yes               |
|                   | Volume of air after sample (μL) | 0.2               | 0.3               | 1.2               |
|                   | Pressure (psi)                  | 0.30              | 0.30              | 0.30              |
|                   | Voltage (kV)                    | 1.40              | 1.50              | 1.20              |
|                   | Polarity                        | Positive          | Negative          | Positive          |
|                   | Air gap before chip             | Yes               | Yes               | Yes               |
|                   | Contact closure timing          | After sample flow | After sample flow | After sample flow |
|                   | Voltage timing                  | Voltage after     | Voltage after     | Voltage after     |
|                   | Equalization delay (s)          | 0                 | 0                 | 5                 |
|                   | Volume after delivery (μL)      | 0.5               | 0.5               | 0.5               |
|                   | Aspiration delay (s)            | 0                 | 0                 | 0                 |
|                   | Contact closure delay (s)       | 0                 | 0                 | 0                 |
|                   | Voltage delay (s)               | 0                 | 0                 | 0                 |

|                                        |                                                          |         |         |         |
|----------------------------------------|----------------------------------------------------------|---------|---------|---------|
| Orbitrap Elite<br>(spectral-stitching) | Aspiration depth (mm)                                    | 1.2     | 1.2     | 1.4     |
|                                        | Use spray sensing                                        | No      | No      | No      |
|                                        | Stabilisation period for spray (s)                       | 15      | 15      | 30      |
|                                        | Number of internal scan replicates                       | 3       | 3       | 3       |
|                                        | Number of SIM stitch windows per internal scan replicate | 10      | 10      | 18      |
|                                        | Maximum ion injection times (ms)                         | 200     | 200     | 200     |
|                                        | Peak resolution at $m/z$ 400                             | 240,000 | 240,000 | 240,000 |
|                                        | Microscans                                               | 7       | 7       | 3       |

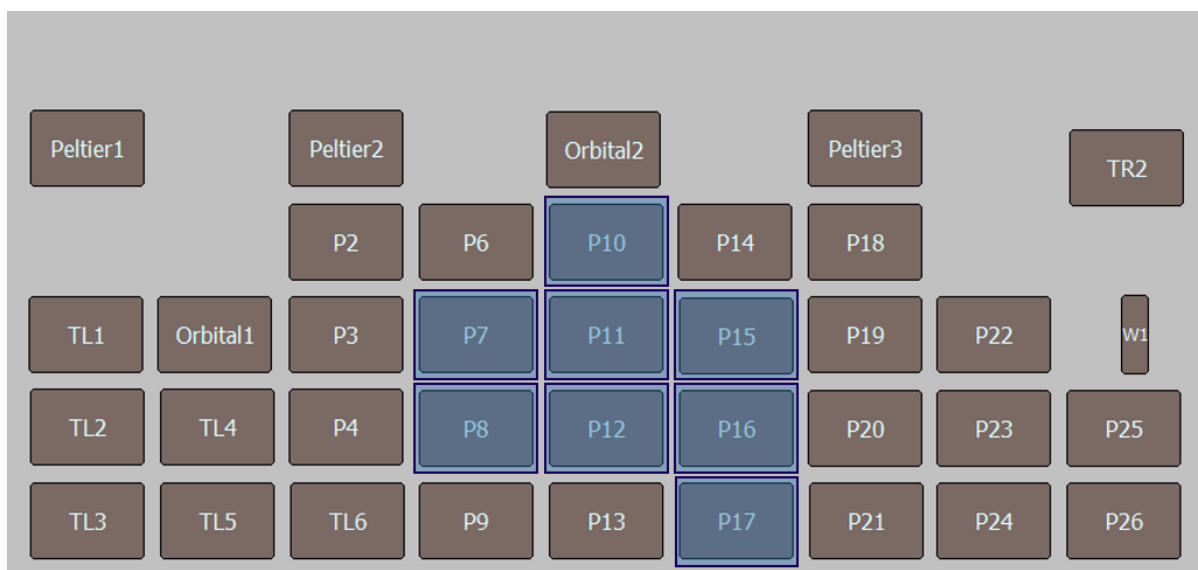

**Figure S2.** The design of the deck of Biomek i7 Hybrid Workstation customised for in vitro metabolomics experiments. Abbreviations: TL – tip loading stations (1-6), Orbital – orbital shakers (1-2), Peltier – Peltier modules maintained at 4 °C (1-3), W – washing station, TR – trash. Automated labware positioners (ALPs) highlighted in blue were maintained at - 15 °C (metabolite extraction) or 4 °C (metabolite resuspension), the remaining ALPs were maintained at room temperature.

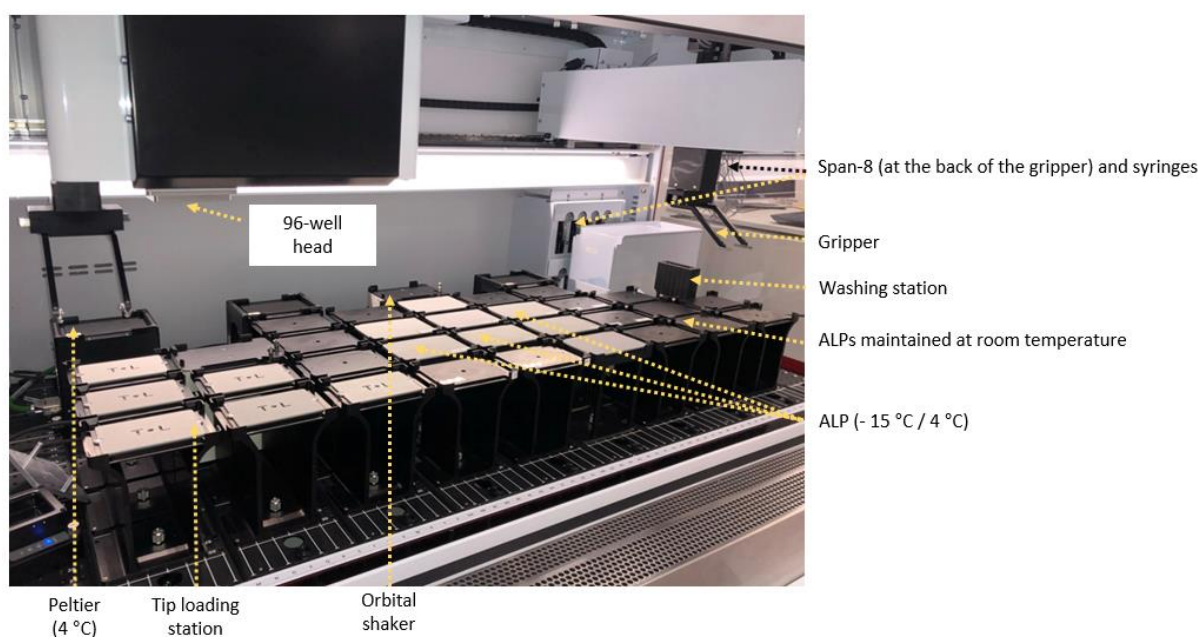

**Figure S3.** The photo of the deck of Biomek i7 Hybrid Workstation customised for in vitro metabolomics experiments.

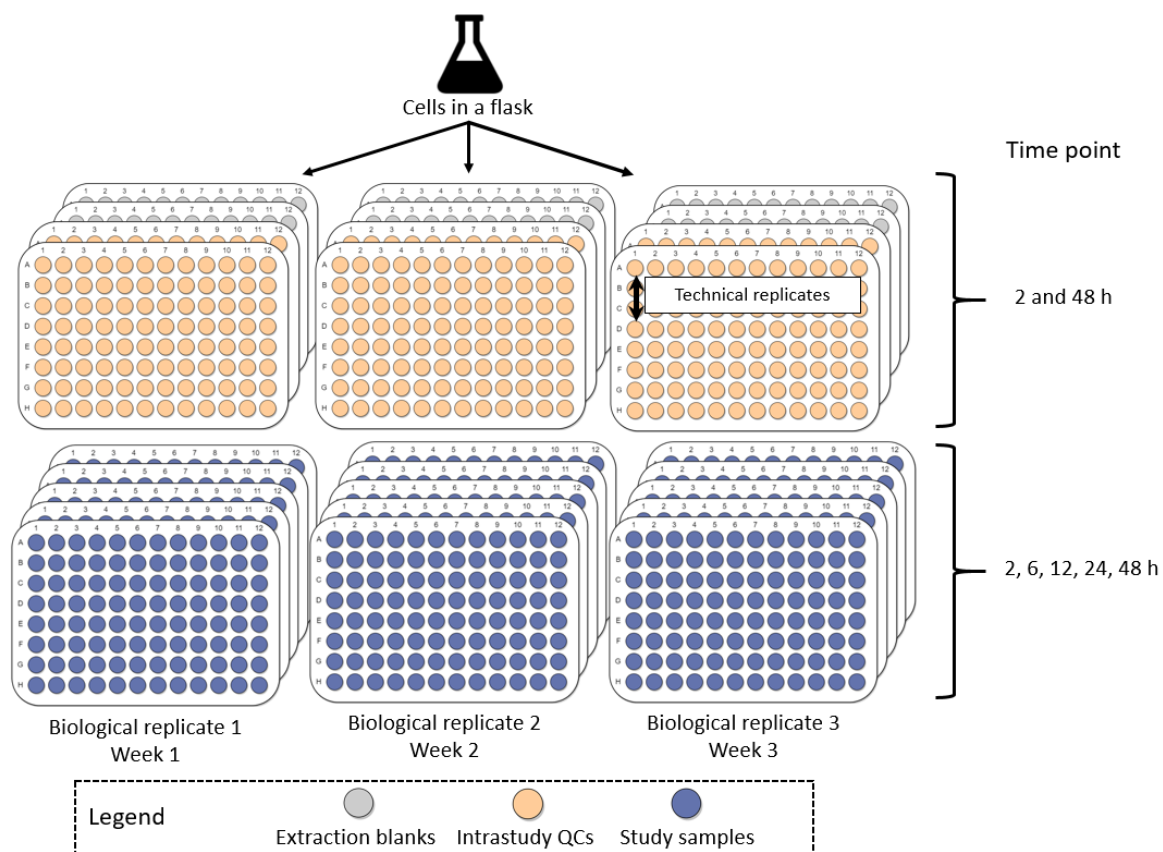

**Figure S4.** Experimental design for the high-throughput metabolomics study shown for one nESI-DIMS assay. The study included 15 study 96-well microplates with cells exposed to four chemicals across five time points. Untreated control samples (the focus of this paper) were incubated in 0.1% DMSO. The extraction blanks and intrastudy QC samples were prepared in the same manner as for the study samples but only at 2 and 48 h. Biological replicates corresponded to cells split during the culturing process, treated across different weeks ( $n=3$ ). Technical replicates included cells on the same 96-well microplates ( $n=9$  for untreated control samples).



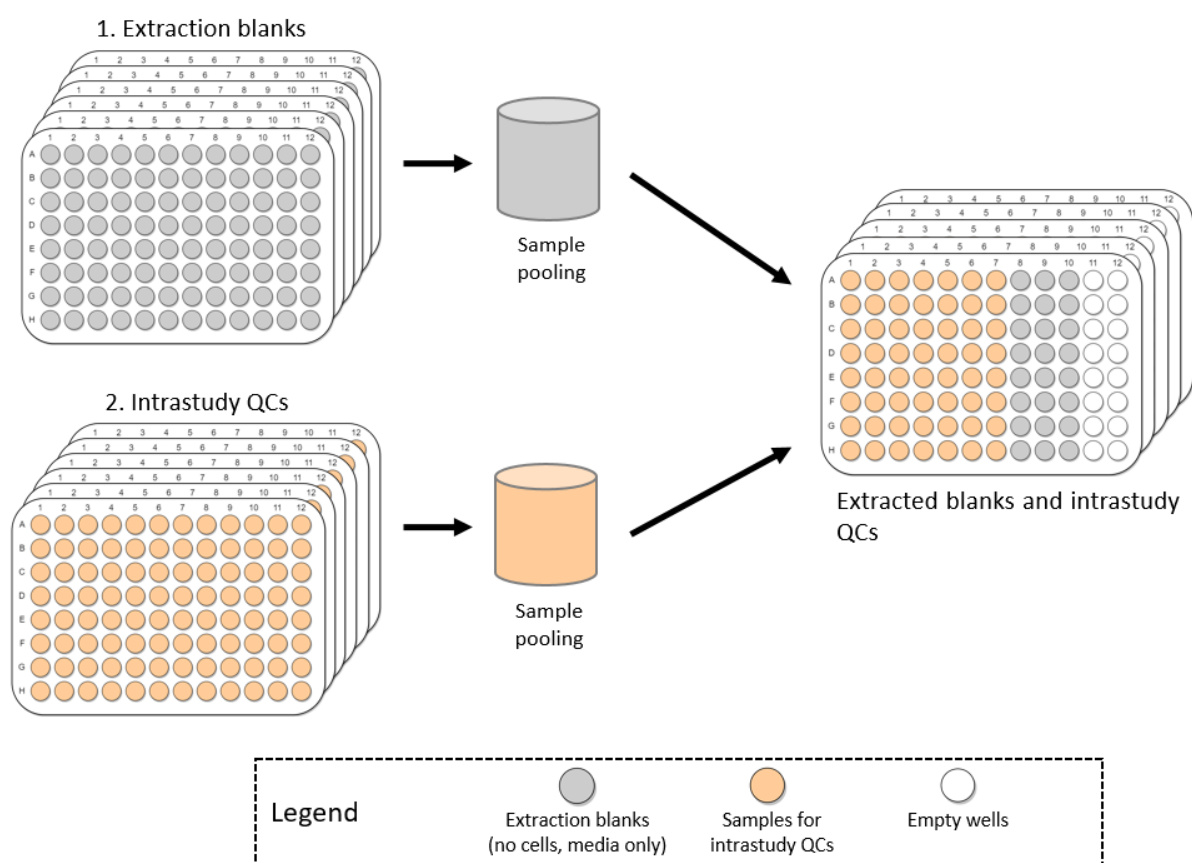

**Figure S5.** The experimental design outlying the generation of extraction blanks and intrastudy QC samples for the high-throughput metabolomics study. These samples were generated alongside the study samples corresponding to three biological replicates at two time points (2 and 48 h).

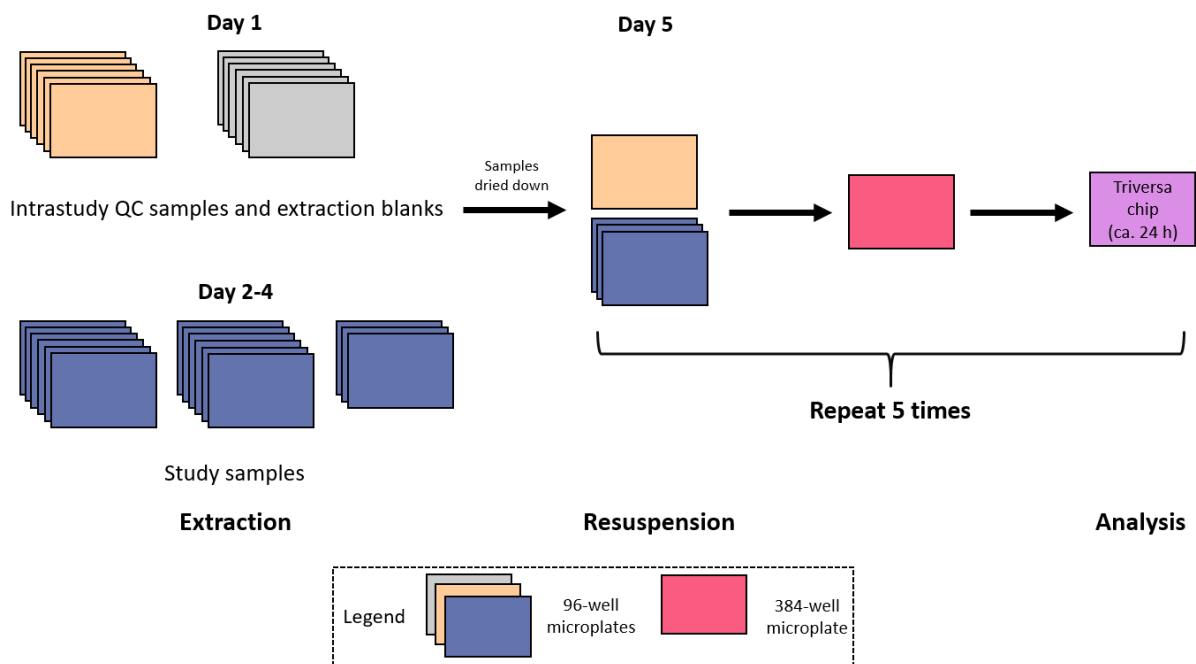

**Figure S6.** High-throughput metabolomics workflow providing an overview of the process of sample extraction, resuspension and analysis for nESI-DIMS assays using 96-well (for culturing and extractions) and 384-well (for nESI-DIMS) microplates.
