# Supplementary material for: Automated Sample Preparation and Data Collection Workflow for High-Throughput In Vitro Metabolomics
Source: Metabolites. 2022 Jan 8;12(1):52. doi: 10.3390/metabo12010052 (PMC8778710; doi:10.3390/metabo12010052)
Supplement: Supplementary file 1 [file metabolites-12-00052-s001.zip › 3_SI_Tables_Annotations-proofs-JMM.xlsx]

## Sheet: Summary
Putative annotations conducted using the Python package BEAMSpy (v1.1.0)
https://github.com/computational-metabolomics/beamspy
Assay and ionisation mode	Study	Excel sheet	Feature count	Number of annotations	Database
Polar positive	Evaluation of sensitivity and repeatability of the automated platform for intracellular metabolite extraction and analysis	S-3a-polarpositive	2329	200	In-house HMDB-based list of quantified or non-quantified metabolites: see Sostare et al. (2021)*
Polar negative	Evaluation of sensitivity and repeatability of the automated platform for intracellular metabolite extraction and analysis	S-3b-polarnegative	4782	273	In-house HMDB-based list of quantified or non-quantified metabolites: see Sostare et al. (2021)*
Polar positive / Polar negative	Evaluation of sensitivity and repeatability of the automated platform for intracellular metabolite extraction and analysis	S-3c-extractionpairs	N/A	N/A	'Not repeatable' features corresponding to extraction pairs I and II that were putatively annotated
Lipid positive	Evaluation of sensitivity and repeatability of the automated platform for intracellular metabolite extraction and analysis	S-3d-lipidpositive	3788	464	LIPID_MAPS - Full database (2020-10-1, v1)
Annotation settings
Ionisation mode	Adducts	Mass error (ppm)
Positive	[M+H]+,[M+Na]+,[M+NH4]+	5
Negative	[M-H]-, [M+Cl]-,[M+Hac-H]-	5
* Sostare, E., Lawson, T. N., Saunders, L. R., Colbourne, J. K., Weber, R. J. M., Sobanski, T., & Viant, M. R. V. Knowledge-driven approaches to create the MTox700+ metabolite panel for predicting toxicity. Toxicological Sciences (Submitted).

## Sheet: S-3a-polarpositive
measured m/z	molecular formula	adduct	HMDB ID	putative name	mass error (ppm)
76.0392	C2H5NO2	[M+H]+	HMDB0000123	Glycine	-1.62
89.1072	C4H12N2	[M+H]+	HMDB0001414	Putrescine	-0.99
90.0548	C3H4O2||C3H4O2||C3H7NO2||C3H7NO2||C3H7NO2||C3H7NO2||C3H7NO2	[M+NH4]+||[M+NH4]+||[M+H]+||[M+H]+||[M+H]+||[M+H]+||[M+H]+	HMDB0001167||HMDB0006112||HMDB0000056||HMDB0000161||HMDB0000271||HMDB0001310||HMDB0062251	Pyruvaldehyde||Malondialdehyde||beta-Alanine||L-Alanine||Sarcosine||D-Alanine||(alpha-D-mannosyl)7-beta-D-mannosyl-diacetylchitobiosyl-L-asparagine, isoform A (protein)	-1.43||-1.43||-1.45||-1.45||-1.45||-1.45||-1.45
102.055	C4H4O2	[M+NH4]+	HMDB0094691	Furanone A	-0.54
112.985	C2H2O4	[M+Na]+	HMDB0002329	Oxalic acid	4.57
118.061	C3H7N3O2	[M+H]+	HMDB0000128	Guanidoacetic acid	0.72
118.086	C5H8O2||C5H8O2||C5H8O2||C5H8O2||C5H8O2||C5H8O2||C5H8O2||C5H11NO2||C5H11NO2||C5H11NO2	[M+NH4]+||[M+NH4]+||[M+NH4]+||[M+NH4]+||[M+NH4]+||[M+NH4]+||[M+NH4]+||[M+H]+||[M+H]+||[M+H]+	HMDB0000509||HMDB0001470||HMDB0031598||HMDB0031602||HMDB0031648||HMDB0033840||HMDB0170858||HMDB0000883||HMDB0003355||HMDB0013716	Senecioic acid||Tiglic acid||2,3-Pentanedione||4-Pentenoic acid||2,4-Pentanedione||Dihydro-5-methyl-2(3H)-furanone||3-Methylbut-3-enoic acid||L-Valine||5-Aminopentanoic acid||Norvaline	-1.16||-1.16||-1.16||-1.16||-1.16||-1.16||-1.16||-1.18||-1.18||-1.18
120.066	C4H9NO3||C4H9NO3||C4H9NO3||C4H9NO3||C4H6O3||C4H6O3||C4H6O3||C4H6O3	[M+H]+||[M+H]+||[M+H]+||[M+H]+||[M+NH4]+||[M+NH4]+||[M+NH4]+||[M+NH4]+	HMDB0000167||HMDB0000719||HMDB0004041||HMDB0061877||HMDB0000005||HMDB0000060||HMDB0001259||HMDB0031646	L-Threonine||L-Homoserine||L-Allothreonine||4-Amino-3-hydroxybutyrate||2-Ketobutyric acid||Acetoacetic acid||Succinic acid semialdehyde||Acetic anhydride	0.14||0.14||0.14||0.14||0.16||0.16||0.16||0.16
122.027	C3H7NO2S||C3H7NO2S	[M+H]+||[M+H]+	HMDB0000574||HMDB0003417	L-Cysteine||D-Cysteine	0.43||0.43
128.032	C3H7NO3||C3H7NO3	[M+Na]+||[M+Na]+	HMDB0000187||HMDB0003406	L-Serine||D-Serine	0.56||0.56
130.05	C5H7NO3||C5H7NO3||C5H7NO3||C5H7NO3||C5H4O3	[M+H]+||[M+H]+||[M+H]+||[M+H]+||[M+NH4]+	HMDB0000267||HMDB0000805||HMDB0001369||HMDB0062585||HMDB0000617	Pyroglutamic acid||Pyrrolidonecarboxylic acid||Pyrroline hydroxycarboxylic acid||(3R,5S)-1-pyrroline-3-hydroxy-5-carboxylic Acid||2-Furoic acid	0.0||0.0||0.0||0.0||0.02
132.066	C5H9NO3||C5H9NO3||C5H9NO3||C5H9NO3||C5H9NO3||C5H9NO3||C5H9NO3	[M+H]+||[M+H]+||[M+H]+||[M+H]+||[M+H]+||[M+H]+||[M+H]+	HMDB0000725||HMDB0000766||HMDB0000783||HMDB0001149||HMDB0006272||HMDB0061880||HMDB0240251	4-Hydroxyproline||N-Acetyl-L-alanine||Propionylglycine||5-Aminolevulinic acid||5-Amino-2-oxopentanoic acid||N-Acetyl-beta-alanine||cis-4-Hydroxyproline	0.76||0.76||0.76||0.76||0.76||0.76||0.76
132.077	C4H6N2O2||C4H6N2O2||C4H9N3O2||C4H9N3O2	[M+NH4]+||[M+NH4]+||[M+H]+||[M+H]+	HMDB0000076||HMDB0003646||HMDB0000064||HMDB0013222	Dihydrouracil||N-Methylhydantoin||Creatine||Beta-Guanidinopropionic acid	-0.16||-0.16||-0.19||-0.19
134.027	C4H7NO2S	[M+H]+	HMDB0062164	Thioproline	0.54
137.071	C7H8N2O	[M+H]+	HMDB0003152	N-Methylnicotinamide	0.56
141.065	C6H5NO2||C6H5NO2||C6H8N2O2||C6H8N2O2||C6H8N2O2	[M+NH4]+||[M+NH4]+||[M+H]+||[M+H]+||[M+H]+	HMDB0001488||HMDB0002243||HMDB0002271||HMDB0002820||HMDB0004988	Nicotinic acid||Picolinic acid||Imidazolepropionic acid||Methylimidazoleacetic acid||Pi-Methylimidazoleacetic acid	-3.78||-3.78||-3.81||-3.81||-3.81
144.048	C6H9NOS	[M+H]+	HMDB0032985	5-(2-Hydroxyethyl)-4-methylthiazole	0.72
144.102	C7H13NO2	[M+H]+	HMDB0004827	Proline betaine	0.76
145.026	C7H6O2||C7H6O2||C7H6O2	[M+Na]+||[M+Na]+||[M+Na]+	HMDB0001870||HMDB0011718||HMDB0034170	Benzoic acid||4-Hydroxybenzaldehyde||2-Hydroxybenzaldehyde	1.88||1.88||1.88
146.021	C6H5NO2||C6H5NO2	[M+Na]+||[M+Na]+	HMDB0001488||HMDB0002243	Nicotinic acid||Picolinic acid	0.91||0.91
146.092	C5H8N2O2||C5H8N2O2||C5H11N3O2	[M+NH4]+||[M+NH4]+||[M+H]+	HMDB0000079||HMDB0062558||HMDB0003464	Dihydrothymine||Pyroglutamine||4-Guanidinobutanoic acid	-3.42||-3.42||-3.43
146.118	C7H15NO2||C7H15NO2||C7H15NO2||C7H12O2||C7H12O2||C7H12O2||C7H12O2	[M+H]+||[M+H]+||[M+H]+||[M+NH4]+||[M+NH4]+||[M+NH4]+||[M+NH4]+	HMDB0001161||HMDB0006831||HMDB0094649||HMDB0029165||HMDB0031342||HMDB0031476||HMDB0031681	4-Trimethylammoniobutanoic acid||3-Dehydroxycarnitine||2-Aminoheptanoate||1,3-Diacetylpropane||Cyclohexanecarboxylic acid||2,3-Heptanedione||Dihydro-5-propyl-2(3H)-furanone	0.76||0.76||0.76||0.78||0.78||0.78||0.78
147.076	C5H10N2O3||C5H10N2O3||C5H10N2O3||C5H10N2O3||C5H7NO3||C5H7NO3||C5H7NO3||C5H7NO3	[M+H]+||[M+H]+||[M+H]+||[M+H]+||[M+NH4]+||[M+NH4]+||[M+NH4]+||[M+NH4]+	HMDB0000641||HMDB0002031||HMDB0003423||HMDB0006899||HMDB0000267||HMDB0000805||HMDB0001369||HMDB0062585	L-Glutamine||Ureidoisobutyric acid||D-Glutamine||Alanylglycine||Pyroglutamic acid||Pyrrolidonecarboxylic acid||Pyrroline hydroxycarboxylic acid||(3R,5S)-1-pyrroline-3-hydroxy-5-carboxylic Acid	0.07||0.07||0.07||0.07||0.08||0.08||0.08||0.08
148.004	C2H7NO3S	[M+Na]+	HMDB0000251	Taurine	0.49
148.06	C5H6O4||C5H6O4||C5H6O4||C5H6O4||C5H6O4||C5H6O4||C5H6O4||C5H9NO4||C5H9NO4||C5H9NO4||C5H9NO4||C5H9NO4	[M+NH4]+||[M+NH4]+||[M+NH4]+||[M+NH4]+||[M+NH4]+||[M+NH4]+||[M+NH4]+||[M+H]+||[M+H]+||[M+H]+||[M+H]+||[M+H]+	HMDB0000620||HMDB0000634||HMDB0000749||HMDB0002092||HMDB0059743||HMDB0060365||HMDB0061185||HMDB0000148||HMDB0002931||HMDB0003011||HMDB0003339||HMDB0060475	Glutaconic acid||Citraconic acid||Mesaconic acid||Itaconic acid||2-Hydroxyglutaric acid lactone||2,5-Dioxopentanoate||2-Pentendioate||L-Glutamic acid||N-Acetylserine||O-Acetylserine||D-Glutamic acid||DL-Glutamate	-0.13||-0.13||-0.13||-0.13||-0.13||-0.13||-0.13||-0.14||-0.14||-0.14||-0.14||-0.14
149.081	C6H12O4||C6H12O4	[M+H]+||[M+H]+	HMDB0000227||HMDB0059705	Mevalonic acid||(2-Methoxyethoxy)propanoic acid	-0.76||-0.76
151.048	C5H8N2O2||C5H8N2O2	[M+Na]+||[M+Na]+	HMDB0000079||HMDB0062558	Dihydrothymine||Pyroglutamine	0.56||0.56
152.032	C5H7NO3||C5H7NO3||C5H7NO3||C5H7NO3	[M+Na]+||[M+Na]+||[M+Na]+||[M+Na]+	HMDB0000267||HMDB0000805||HMDB0001369||HMDB0062585	Pyroglutamic acid||Pyrrolidonecarboxylic acid||Pyrroline hydroxycarboxylic acid||(3R,5S)-1-pyrroline-3-hydroxy-5-carboxylic Acid	0.5||0.5||0.5||0.5
154.059	C4H9N3O2||C4H9N3O2	[M+Na]+||[M+Na]+	HMDB0000064||HMDB0013222	Creatine||Beta-Guanidinopropionic acid	0.73||0.73
155.043	C4H8N2O3||C4H8N2O3||C4H8N2O3||C4H8N2O3||C4H8N2O3	[M+Na]+||[M+Na]+||[M+Na]+||[M+Na]+||[M+Na]+	HMDB0000026||HMDB0000168||HMDB0011733||HMDB0012265||HMDB0062812	Ureidopropionic acid||L-Asparagine||Glycyl-glycine||N-Carbamoylsarcosine||N-carbamoyl-beta-alaninate	0.79||0.79||0.79||0.79||0.79
156.027	C4H7NO4||C4H7NO4||C4H7NO4	[M+Na]+||[M+Na]+||[M+Na]+	HMDB0000191||HMDB0006483||HMDB0011753	L-Aspartic acid||D-Aspartic acid||Iminodiacetic acid	0.82||0.82||0.82
156.042	C8H7NO||C8H7NO	[M+Na]+||[M+Na]+	HMDB0059805||HMDB0061918	5-Hydroxyindole||1,3-Dihydro-(2H)-indol-2-one	1.53||1.53
157.011	C4H6O5||C4H6O5||C4H6O5	[M+Na]+||[M+Na]+||[M+Na]+	HMDB0000156||HMDB0000744||HMDB0031518	L-Malic acid||Malic acid||D-Malic acid	0.73||0.73||0.73
160.061	C6H6O4||C6H6O4||C6H6O4||C7H9N2O	[M+NH4]+||[M+NH4]+||[M+NH4]+||[M+Na]+	HMDB0002432||HMDB0006331||HMDB0059762||HMDB0000699	Sumiki's acid||cis,cis-Muconic acid||2,3-Methylenesuccinic acid||1-Methylnicotinamide	0.83||0.83||0.83||-0.9
160.133	C8H17NO2||C8H14O2||C8H14O2	[M+H]+||[M+NH4]+||[M+NH4]+	HMDB0000991||HMDB0031293||HMDB0031343	DL-2-Aminooctanoic acid||2,3-Octanedione||Methyl cyclohexanecarboxylate	0.75||0.76||0.76
161.092	C6H12N2O3||C6H12N2O3||C6H9NO3||C6H9NO3	[M+H]+||[M+H]+||[M+NH4]+||[M+NH4]+	HMDB0003459||HMDB0028680||HMDB0000894||HMDB0061705	D-Alanyl-D-alanine||Alanyl-Alanine||Vinylacetylglycine||6-Oxopiperidine-2-carboxylic acid	0.98||0.98||0.99||0.99
161.129	C7H16N2O2||C7H13NO2	[M+H]+||[M+NH4]+	HMDB0002038||HMDB0004827	N(6)-Methyllysine||Proline betaine	0.87||0.88
162.113	C7H15NO3||C7H12O3	[M+H]+||[M+NH4]+	HMDB0000062||HMDB0001988	L-Carnitine||4-Hydroxycyclohexylcarboxylic acid	0.44||0.45
163.119	C5H11N3O2	[M+NH4]+	HMDB0003464	4-Guanidinobutanoic acid	-0.64
164.008	C2H8NO4P	[M+Na]+	HMDB0000224	O-Phosphoethanolamine	0.74
169.058	C5H10N2O3||C5H10N2O3||C5H10N2O3||C5H10N2O3	[M+Na]+||[M+Na]+||[M+Na]+||[M+Na]+	HMDB0000641||HMDB0002031||HMDB0003423||HMDB0006899	L-Glutamine||Ureidoisobutyric acid||D-Glutamine||Alanylglycine	0.68||0.68||0.68||0.68
170.042	C5H9NO4||C5H9NO4||C5H9NO4||C5H9NO4||C5H9NO4	[M+Na]+||[M+Na]+||[M+Na]+||[M+Na]+||[M+Na]+	HMDB0000148||HMDB0002931||HMDB0003011||HMDB0003339||HMDB0060475	L-Glutamic acid||N-Acetylserine||O-Acetylserine||D-Glutamic acid||DL-Glutamate	0.33||0.33||0.33||0.33||0.33
171.028	C7H6O5||C7H6O5	[M+H]+||[M+H]+	HMDB0029649||HMDB0059964	2,4,6-Trihydroxybenzoic acid||2,3,4-Trihydroxybenzoic acid	-4.69||-4.69
172.047	C4H10O2S2	[M+NH4]+	HMDB0013593	1,4-Dithiothreitol	3.83
182.058	C10H9NO	[M+Na]+	HMDB0001190	Indoleacetaldehyde	1.85
185.129	C9H16N2O2||C9H13NO2||C9H13NO2||C9H13NO2	[M+H]+||[M+NH4]+||[M+NH4]+||[M+NH4]+	HMDB0061384||HMDB0000022||HMDB0004826||HMDB0012162	N-(3-acetamidopropyl)pyrrolidin-2-one||3-Methoxytyramine||p-Synephrine||4-Methoxytyramine	0.37||0.38||0.38||0.38
186.016	C3H8NO6P||C3H8NO6P||C3H5O6P	[M+H]+||[M+H]+||[M+NH4]+	HMDB0000272||HMDB0001721||HMDB0000263	Phosphoserine||DL-O-Phosphoserine||Phosphoenolpyruvic acid	1.06||1.06||1.07
186.113	C9H15NO3||C9H15NO3||C9H15NO3||C9H15NO3||C9H12O3	[M+H]+||[M+H]+||[M+H]+||[M+H]+||[M+NH4]+	HMDB0094728||HMDB0094729||HMDB0094730||HMDB0094731||HMDB0059963	2-Hepteneoylglycine||3-Hepteneoylglycine||4-Hepteneoylglycine||5-Hepteneoylglycine||1,3,5-Trimethoxybenzene	0.45||0.45||0.45||0.45||0.46
188.176	C9H21N3O||C9H21N3O	[M+H]+||[M+H]+	HMDB0001276||HMDB0002189	N1-Acetylspermidine||N8-Acetylspermidine	0.52||0.52
189.051	C9H10O3||C9H10O3||C9H10O3||C9H10O3||C9H10O3||C9H10O3||C9H10O3||C9H10O3||C9H10O3||C9H10O3||C9H10O3	[M+Na]+||[M+Na]+||[M+Na]+||[M+Na]+||[M+Na]+||[M+Na]+||[M+Na]+||[M+Na]+||[M+Na]+||[M+Na]+||[M+Na]+	HMDB0000375||HMDB0000563||HMDB0000748||HMDB0000779||HMDB0002072||HMDB0002199||HMDB0029817||HMDB0033752||HMDB0041683||HMDB0059969||HMDB0142137	3-(3-Hydroxyphenyl)propanoic acid||D-Phenyllactic acid||L-3-Phenyllactic acid||Phenyllactic acid||4-Methoxyphenylacetic acid||Desaminotyrosine||Ethyl salicylate||3-(2-Hydroxyphenyl)propanoic acid||4-Hydroxyphenyl-2-propionic acid||3-Methoxyphenylacetic acid||2-hydroxy-2-phenylpropanoic acid	-4.98||-4.98||-4.98||-4.98||-4.98||-4.98||-4.98||-4.98||-4.98||-4.98||-4.98
189.16	C9H20N2O2	[M+H]+	HMDB0001325	N6,N6,N6-Trimethyl-L-lysine	0.65
190.082	C6H8N2O4	[M+NH4]+	HMDB0001212	Hydantoin-5-propionic acid	-2.96
190.083	C9H13NO2||C9H13NO2||C9H13NO2	[M+Na]+||[M+Na]+||[M+Na]+	HMDB0000022||HMDB0004826||HMDB0012162	3-Methoxytyramine||p-Synephrine||4-Methoxytyramine	-2.78||-2.78||-2.78
192.066	C10H9NO3||C10H9NO3||C10H9NO3	[M+H]+||[M+H]+||[M+H]+	HMDB0000763||HMDB0035514||HMDB0094657	5-Hydroxyindoleacetic acid||xi-2,3-Dihydro-2-oxo-1H-indole-3-acetic acid||2-Oxindole-3-acetate	0.59||0.59||0.59
195.003	C3H9O6P||C3H9O6P	[M+Na]+||[M+Na]+	HMDB0000126||HMDB0002520	Glycerol 3-phosphate||Beta-Glycerophosphoric acid	0.5||0.5
201.016	C4H9O7P	[M+H]+	HMDB0001321	D-Erythrose 4-phosphate	1.65
201.031	C5H10N2O3S	[M+Na]+	HMDB0000078	Cysteinylglycine	0.77
203.139	C9H18N2O3||C9H18N2O3||C9H18N2O3||C9H18N2O3||C9H15NO3||C9H15NO3||C9H15NO3||C9H15NO3	[M+H]+||[M+H]+||[M+H]+||[M+H]+||[M+NH4]+||[M+NH4]+||[M+NH4]+||[M+NH4]+	HMDB0028690||HMDB0028691||HMDB0028900||HMDB0028922||HMDB0094728||HMDB0094729||HMDB0094730||HMDB0094731	Alanyl-Isoleucine||Alanyl-Leucine||Isoleucyl-Alanine||Leucyl-Alanine||2-Hepteneoylglycine||3-Hepteneoylglycine||4-Hepteneoylglycine||5-Hepteneoylglycine	0.37||0.37||0.37||0.37||0.38||0.38||0.38||0.38
203.15	C8H18N4O2||C8H18N4O2	[M+H]+||[M+H]+	HMDB0001539||HMDB0003334	Asymmetric dimethylarginine||Symmetric dimethylarginine	0.53||0.53
204.123	C9H17NO4||C9H17NO4||C9H17NO4	[M+H]+||[M+H]+||[M+H]+	HMDB0000201||HMDB0062176||HMDB0240626	L-Acetylcarnitine||N-lactoyl-Leucine||1-Carboxyethylleucine	0.0||0.0||0.0
205.082	C7H12N2O5	[M+H]+	HMDB0011667	gamma-Glutamylglycine	0.63
207.062	C9H12O4||C9H12O4	[M+Na]+||[M+Na]+	HMDB0001490||HMDB0059730	Vanylglycol||3,4-Methylenepimelic acid	-4.94||-4.94
207.998	C3H8NO6P||C3H8NO6P	[M+Na]+||[M+Na]+	HMDB0000272||HMDB0001721	Phosphoserine||DL-O-Phosphoserine	0.81||0.81
208.06	C10H9NO4	[M+H]+	HMDB0000978	4-(2-Aminophenyl)-2,4-dioxobutanoic acid	-4.18
208.082	C7H10O6||C7H10O6	[M+NH4]+||[M+NH4]+	HMDB0012710||HMDB0240294	3-Dehydroquinate||2-O-Methylascorbic acid	0.79||0.79
209.092	C10H12N2O3||C10H12N2O3||C10H9NO3||C10H9NO3||C10H9NO3	[M+H]+||[M+H]+||[M+NH4]+||[M+NH4]+||[M+NH4]+	HMDB0000684||HMDB0012948||HMDB0000763||HMDB0035514||HMDB0094657	L-Kynurenine||Formyl-5-hydroxykynurenamine||5-Hydroxyindoleacetic acid||xi-2,3-Dihydro-2-oxo-1H-indole-3-acetic acid||2-Oxindole-3-acetate	0.33||0.33||0.34||0.34||0.34
213.048	C6H10N2O5	[M+Na]+	HMDB0015673	Carglumic acid	0.49
214.048	C10H9NO3||C10H9NO3||C10H9NO3	[M+Na]+||[M+Na]+||[M+Na]+	HMDB0000763||HMDB0035514||HMDB0094657	5-Hydroxyindoleacetic acid||xi-2,3-Dihydro-2-oxo-1H-indole-3-acetic acid||2-Oxindole-3-acetate	0.42||0.42||0.42
214.084	C11H13NO2	[M+Na]+	HMDB0001896	5-Methoxytryptophol	1.09
215.016	C6H8O7||C6H8O7	[M+Na]+||[M+Na]+	HMDB0000094||HMDB0000193	Citric acid||Isocitric acid	0.41||0.41
215.084	C9H14N2O2S	[M+H]+	HMDB0004822	Methyl bisnorbiotinyl ketone	-4.26
217.059	C4H10NO6P||C9H10N2O3||C9H10N2O3	[M+NH4]+||[M+Na]+||[M+Na]+	HMDB0011185||HMDB0001867||HMDB0059723	O-Phosphothreonine||4-Aminohippuric acid||Pyridylacetylglycine	0.62||0.78||0.78
218.139	C10H19NO4||C10H16O4||C10H16O4	[M+H]+||[M+NH4]+||[M+NH4]+	HMDB0000824||HMDB0000603||HMDB0013227	Propionylcarnitine||cis-4-Decenedioic acid||cis-5-Decenedioic acid	0.1||0.11||0.11
227.079	C11H12N2O2||C11H12N2O2||C11H12N2O2	[M+Na]+||[M+Na]+||[M+Na]+	HMDB0000929||HMDB0013609||HMDB0030396	L-Tryptophan||D-Tryptophan||(Â±)-Tryptophan	0.82||0.82||0.82
227.103	C10H14N2O4||C10H11NO4	[M+H]+||[M+NH4]+	HMDB0000245||HMDB0000735	Porphobilinogen||Hydroxyphenylacetylglycine	0.79||0.8
227.114	C9H14N4O3||C9H14N4O3||C9H14N4O3	[M+H]+||[M+H]+||[M+H]+	HMDB0000033||HMDB0028689||HMDB0028878	Carnosine||Alanyl-Histidine||Histidinyl-Alanine	0.68||0.68||0.68
229.155	C11H20N2O3||C11H20N2O3||C11H20N2O3	[M+H]+||[M+H]+||[M+H]+	HMDB0011174||HMDB0011175||HMDB0240365	Isoleucylproline||Leucylproline||N,?N,?N-?Trimethyl-?L-?alanyl-?L-?proline betaine	0.51||0.51||0.51
231.074	C10H12N2O3||C10H12N2O3	[M+Na]+||[M+Na]+	HMDB0000684||HMDB0012948	L-Kynurenine||Formyl-5-hydroxykynurenamine	-0.15||-0.15
231.17	C11H19NO3||C11H19NO3||C11H19NO3||C11H19NO3||C11H19NO3||C11H19NO3||C11H19NO3||C11H22N2O3||C11H22N2O3||C11H22N2O3||C11H22N2O3	[M+NH4]+||[M+NH4]+||[M+NH4]+||[M+NH4]+||[M+NH4]+||[M+NH4]+||[M+NH4]+||[M+H]+||[M+H]+||[M+H]+||[M+H]+	HMDB0094807||HMDB0094808||HMDB0094809||HMDB0094810||HMDB0094811||HMDB0094812||HMDB0094813||HMDB0028920||HMDB0028942||HMDB0029130||HMDB0029131	2-nonenoylglycine||3-nonenoylglycine||4-nonenoylglycine||5-nonenoylglycine||6-nonenoylglycine||7-nonenoylglycine||8-nonenoylglycine||Isoleucyl-Valine||Leucyl-Valine||Valyl-Isoleucine||Valyl-Leucine	-0.11||-0.11||-0.11||-0.11||-0.11||-0.11||-0.11||-0.12||-0.12||-0.12||-0.12
232.154	C11H21NO4||C11H21NO4	[M+H]+||[M+H]+	HMDB0000736||HMDB0002013	Isobutyryl-L-carnitine||Butyrylcarnitine	-0.23||-0.23
233.027	C6H10O8||C6H10O8	[M+Na]+||[M+Na]+	HMDB0000639||HMDB0000663	Galactaric acid||Glucaric acid	0.7||0.7
234.025	C4H10N3O5P	[M+Na]+	HMDB0001511	Phosphocreatine	-0.07
234.145	C9H16N2O4	[M+NH4]+	HMDB0240345	N2,N5-Diacetylornithine	0.44
238.045	C5H14NO6P	[M+Na]+	HMDB0000114	Glycerylphosphorylethanolamine	-0.33
240.102	C7H14N2O4S	[M+NH4]+	HMDB0000099	L-Cystathionine	3.03
243.074	C11H12N2O3	[M+Na]+	HMDB0000472	5-Hydroxy-L-tryptophan	0.5
244.129	C10H17N3O4||C10H14N2O4	[M+H]+||[M+NH4]+	HMDB0028805||HMDB0000245	Glutaminylproline||Porphobilinogen	0.27||0.28
244.154	C12H18O4||C12H21NO4	[M+NH4]+||[M+H]+	HMDB0059729||HMDB0002366	3,4-Methylenesebacic acid||Tiglylcarnitine	-0.36||-0.37
245.057	C7H14N2O4S	[M+Na]+	HMDB0000099	L-Cystathionine	-0.3
245.186	C12H24N2O3||C12H24N2O3||C12H24N2O3||C12H24N2O3	[M+H]+||[M+H]+||[M+H]+||[M+H]+	HMDB0028910||HMDB0028911||HMDB0028932||HMDB0028933	Isoleucyl-Isoleucine||Isoleucyl-Leucine||Leucyl-Isoleucine||Leucyl-Leucine	-0.11||-0.11||-0.11||-0.11
246.17	C12H20O4||C12H23NO4||C12H23NO4||C12H23NO4	[M+NH4]+||[M+H]+||[M+H]+||[M+H]+	HMDB0000933||HMDB0000378||HMDB0000688||HMDB0013128	Traumatic acid||2-Methylbutyroylcarnitine||Isovalerylcarnitine||Valerylcarnitine	-0.43||-0.43||-0.43||-0.43
246.181	C11H20N2O3||C11H20N2O3||C11H20N2O3||C11H23N3O3||C11H23N3O3	[M+NH4]+||[M+NH4]+||[M+NH4]+||[M+H]+||[M+H]+	HMDB0011174||HMDB0011175||HMDB0240365||HMDB0028964||HMDB0029132	Isoleucylproline||Leucylproline||N,?N,?N-?Trimethyl-?L-?alanyl-?L-?proline betaine||Lysyl-Valine||Valyl-Lysine	-0.44||-0.44||-0.44||-0.44||-0.44
248.149	C11H21NO5||C11H21NO5	[M+H]+||[M+H]+	HMDB0013127||HMDB0062735	Hydroxybutyrylcarnitine||(R)-3-hydroxybutyrylcarnitine	-0.35||-0.35
251.064	C9H12N2O5	[M+Na]+	HMDB0000012	Deoxyuridine	-0.33
251.07	C8H14N2O5S||C8H14N2O5S||C8H11NO5S||C8H11NO5S	[M+H]+||[M+H]+||[M+NH4]+||[M+NH4]+	HMDB0001049||HMDB0028816||HMDB0004148||HMDB0006275	gamma-Glutamylcysteine||Glutamylcysteine||Dopamine 4-sulfate||Dopamine 3-O-sulfate	0.67||0.67||0.68||0.68
253.009	C5H11O8P||C5H11O8P||C5H11O8P||C5H11O8P	[M+Na]+||[M+Na]+||[M+Na]+||[M+Na]+	HMDB0000618||HMDB0000868||HMDB0001489||HMDB0001548	D-Ribulose 5-phosphate||Xylulose 5-phosphate||Ribose 1-phosphate||D-Ribose 5-phosphate	0.73||0.73||0.73||0.73
255.096	C9H16N2O5||C9H16N2O5	[M+Na]+||[M+Na]+	HMDB0001199||HMDB0029123	N2-Succinyl-L-ornithine||Valyl-Aspartate	2.34||2.34
256.025	C8H11NO5S||C8H11NO5S	[M+Na]+||[M+Na]+	HMDB0004148||HMDB0006275	Dopamine 4-sulfate||Dopamine 3-O-sulfate	0.63||0.63
260.16	C11H21N3O4||C11H21N3O4||C11H21N3O4	[M+H]+||[M+H]+||[M+H]+	HMDB0028800||HMDB0028801||HMDB0028927	Glutaminylisoleucine||Glutaminylleucine||Leucyl-Glutamine	-0.44||-0.44||-0.44
260.197	C12H25N3O3||C12H25N3O3	[M+H]+||[M+H]+	HMDB0028954||HMDB0028955	Lysyl-Isoleucine||Lysyl-Leucine	-0.58||-0.58
261.037	C6H13O9P||C6H13O9P||C6H13O9P||C6H13O9P||C6H13O9P||C6H13O9P||C6H13O9P	[M+H]+||[M+H]+||[M+H]+||[M+H]+||[M+H]+||[M+H]+||[M+H]+	HMDB0000124||HMDB0000213||HMDB0000645||HMDB0001078||HMDB0001401||HMDB0001586||HMDB0002985	Fructose 6-phosphate||Myo-inositol 1-phosphate||Galactose 1-phosphate||Mannose 6-phosphate||Glucose 6-phosphate||Glucose 1-phosphate||Inositol phosphate	0.09||0.09||0.09||0.09||0.09||0.09||0.09
261.145	C11H20N2O5||C11H20N2O5||C11H20N2O5||C11H20N2O5||C11H20N2O5||C11H20N2O5	[M+H]+||[M+H]+||[M+H]+||[M+H]+||[M+H]+||[M+H]+	HMDB0011170||HMDB0011171||HMDB0028822||HMDB0028823||HMDB0028906||HMDB0028928	gamma-Glutamylisoleucine||gamma-Glutamylleucine||Glutamylisoleucine||Glutamylleucine||Isoleucyl-Glutamate||Leucyl-Glutamate	0.31||0.31||0.31||0.31||0.31||0.31
261.156	C10H17N3O4	[M+NH4]+	HMDB0028805	Glutaminylproline	-0.56
262.14	C10H19N3O5	[M+H]+	HMDB0004987	Aspartyllysine	-0.56
262.165	C12H23NO5||C12H23NO5||C12H23NO5	[M+H]+||[M+H]+||[M+H]+	HMDB0061189||HMDB0062555||HMDB0240421	3-Hydroxyisovalerylcarnitine||hydroxyisovaleroyl carnitine||2-Hydroxyisovalerylcarnitine	-0.56||-0.56||-0.56
263.139	C14H15NO3||C14H18N2O3||C14H18N2O3	[M+NH4]+||[M+H]+||[M+H]+	HMDB0059782||HMDB0011177||HMDB0011179	N-Phenylacetyl pyroglutamic acid||Phenylalanylproline||Prolylphenylalanine	-0.34||-0.35||-0.35
264.118	C9H14N2O6||C9H17N3O6	[M+NH4]+||[M+H]+	HMDB0000497||HMDB0240254	5,6-Dihydrouridine||Creatine riboside	-2.76||-2.77
265.085	C9H16N2O5S	[M+H]+	HMDB0002381	N-Acetylcystathionine	0.33
267.134	C13H18N2O4||C13H18N2O4	[M+H]+||[M+H]+	HMDB0029005||HMDB0029068	Phenylalanyl-Threonine||Threoninyl-Phenylalanine	0.3||0.3
268.104	C10H13N5O4||C10H13N5O4	[M+H]+||[M+H]+	HMDB0000050||HMDB0000085	Adenosine||Deoxyguanosine	0.17||0.17
269.04	C6H15O8P	[M+Na]+	HMDB0240316	Glycerophosphoglycerol	-0.46
269.111	C10H18N2O5||C10H18N2O5||C10H18N2O5||C10H18N2O5||C10H18N2O5	[M+Na]+||[M+Na]+||[M+Na]+||[M+Na]+||[M+Na]+	HMDB0011172||HMDB0028757||HMDB0028832||HMDB0028903||HMDB0029126	gamma-Glutamylvaline||Aspartyl-Leucine||Glutamylvaline||Isoleucyl-Aspartate||Valyl-Glutamate	-0.14||-0.14||-0.14||-0.14||-0.14
269.161	C12H20N4O3||C12H20N4O3	[M+H]+||[M+H]+	HMDB0028888||HMDB0028889	Histidinyl-Isoleucine||Histidinyl-Leucine	-0.09||-0.09
270.014	C8H10NO6P	[M+Na]+	HMDB0001491	Pyridoxal 5'-phosphate	-0.48
273.051	C8H14N2O5S||C8H14N2O5S	[M+Na]+||[M+Na]+	HMDB0001049||HMDB0028816	gamma-Glutamylcysteine||Glutamylcysteine	-0.36||-0.36
276.155	C11H21N3O5||C11H21N3O5||C11H21N3O5	[M+H]+||[M+H]+||[M+H]+	HMDB0003869||HMDB0004207||HMDB0029154	Epsilon-(gamma-Glutamyl)-lysine||Glutamyllysine||gamma-Glutamyllysine	-0.48||-0.48||-0.48
277.038	C10H12O7S	[M+H]+	HMDB0041724	Dihydroferulic acid 4-sulfate	1.86
277.105	C12H22O2Si2	[M+Na]+	HMDB0094664	1,2-Benzenediol bis(trimethylsilyl) ether	-1.11
279.17	C15H22N2O3||C15H22N2O3||C15H22N2O3	[M+H]+||[M+H]+||[M+H]+	HMDB0013243||HMDB0028914||HMDB0028998	Leucyl-phenylalanine||Isoleucyl-Phenylalanine||Phenylalanyl-Isoleucine	-0.38||-0.38||-0.38
280.09	C10H15N3O5||C10H15N3O5||C10H15N3O5	[M+Na]+||[M+Na]+||[M+Na]+	HMDB0000982||HMDB0039229||HMDB0240577	5-Methylcytidine||Pyro-L-glutaminyl-L-glutamine||3-Methylcytidine	-1.85||-1.85||-1.85
280.092	C8H20NO6P	[M+Na]+	HMDB0000086	Glycerophosphocholine	-0.58
283.019	C6H13O9P||C6H13O9P||C6H13O9P||C6H13O9P||C6H13O9P||C6H13O9P||C6H13O9P	[M+Na]+||[M+Na]+||[M+Na]+||[M+Na]+||[M+Na]+||[M+Na]+||[M+Na]+	HMDB0000124||HMDB0000213||HMDB0000645||HMDB0001078||HMDB0001401||HMDB0001586||HMDB0002985	Fructose 6-phosphate||Myo-inositol 1-phosphate||Galactose 1-phosphate||Mannose 6-phosphate||Glucose 6-phosphate||Glucose 1-phosphate||Inositol phosphate	-0.31||-0.31||-0.31||-0.31||-0.31||-0.31||-0.31
287.1	C13H16N2O4||C13H16N2O4||C13H16N2O4	[M+Na]+||[M+Na]+||[M+Na]+	HMDB0004259||HMDB0006344||HMDB0062645	Acetyl-N-formyl-5-methoxykynurenamine||Phenylacetylglutamine||N(2)-phenylacetyl-L-glutaminate	-0.04||-0.04||-0.04
288.217	C15H29NO4	[M+H]+	HMDB0000791	L-Octanoylcarnitine	-0.23
290.16	C13H23NO6||C13H23NO6	[M+H]+||[M+H]+	HMDB0000552||HMDB0061677	3-Methylglutarylcarnitine||O-Adipoylcarnitine	-0.01||-0.01
291.054	C11H14O7S||C11H14O7S	[M+H]+||[M+H]+	HMDB0059975||HMDB0059976	4-Hydroxy-5-(3'-hydroxyphenyl)-valeric acid-3'-O-sulphate||4-Hydroxy-5-(4'-hydroxyphenyl)-valeric acid-4'-O-sulphate	2.16||2.16
298.097	C11H15N5O3S	[M+H]+	HMDB0001173	5'-Methylthioadenosine	-0.28
299.067	C10H16N2O5S	[M+Na]+	HMDB0004818	Biotin sulfone	0.44
299.085	C10H16N2O7	[M+Na]+	HMDB0011737	gamma-Glutamylglutamic acid	0.37
299.1	C14H16N2O4	[M+Na]+	HMDB0062178	N-lactoyl-Tryptophan	-0.09
302.233	C16H31NO4||C16H31NO4	[M+H]+||[M+H]+	HMDB0006320||HMDB0013288	2,6 Dimethylheptanoyl carnitine||Nonanoylcarnitine	-0.22||-0.22
303.054	C12H14O7S	[M+H]+	HMDB0060031	5-(3',5'-Dihydroxyphenyl)-gamma-valerolactone-O-sulphate-O-methyl	2.04
305.033	C11H12O8S||C11H12O8S||C11H12O8S	[M+H]+||[M+H]+||[M+H]+	HMDB0059985||HMDB0059987||HMDB0060020	5-(3',4',5'-Trihydroxyphenyl)-gamma-valerolactone-3'-O-sulphate||5-(3',4',5'-Trihydroxyphenyl)-gamma-valerolactone-4'-O-sulphate||Sinapinic acid-O-sulphate	2.0||2.0||2.0
307.033	C9H11N2O8P	[M+H]+	HMDB0011640	Uridine 2',3'-cyclic phosphate	2.85
311.02	C11H12O7S	[M+Na]+	HMDB0029191	5'-(3',4'-Dihydroxyphenyl)-gamma-valerolactone sulfate	1.98
316.248	C17H33NO4	[M+H]+	HMDB0000651	Decanoylcarnitine	-0.2
320.036	C8H15N3O5S2	[M+Na]+	HMDB0000709	L-Cysteinylglycine disulfide	3.54
320.079	C11H15N5O3S||C12H14O7S	[M+Na]+||[M+NH4]+	HMDB0001173||HMDB0060031	5'-Methylthioadenosine||5-(3',5'-Dihydroxyphenyl)-gamma-valerolactone-O-sulphate-O-methyl	-0.12||-3.45
325.005	C9H10INO3	[M+NH4]+	HMDB0000021	Iodotyrosine	2.69
325.053	C12H14O9	[M+Na]+	HMDB0060017	Pyrogallol-2-O-glucuronide	-0.35
325.177	C19H26O3||C19H26O3||C19H26O3	[M+Na]+||[M+Na]+||[M+Na]+	HMDB0000380||HMDB0000405||HMDB0003955	2-Hydroxyestradiol-3-methyl ether||2-Methoxyestradiol||19-Hydroxyandrost-4-ene-3,17-dione	-0.02||-0.02||-0.02
330.073	C10H17N3O6S	[M+Na]+	HMDB0000125	Glutathione	-0.71
332.074	C14H15NO7	[M+Na]+	HMDB0010319	Indoxyl glucuronide	-1.31
333.106	C14H18N2O6||C14H18N2O6||C14H18N2O6	[M+Na]+||[M+Na]+||[M+Na]+	HMDB0011741||HMDB0028831||HMDB0029104	gamma-Glutamyltyrosine||Glutamyltyrosine||Tyrosyl-Glutamate	-0.33||-0.33||-0.33
339.229	C21H32O2||C21H32O2||C21H32O2||C21H32O2	[M+Na]+||[M+Na]+||[M+Na]+||[M+Na]+	HMDB0000253||HMDB0003069||HMDB0003759||HMDB0034369	Pregnenolone||20a-Dihydroprogesterone||5a-Pregnane-3,20-dione||(3beta,5alpha)-3-Hydroxypregn-16-en-20-one	-0.01||-0.01||-0.01||-0.01
341.053	C18H10N2O4	[M+Na]+	HMDB0004068	Melanin	-0.83
342.07	C9H13N2O9P||C9H13N2O9P	[M+NH4]+||[M+NH4]+	HMDB0000288||HMDB0060282	Uridine 5'-monophosphate||3'-UMP	0.07||0.07
344.28	C19H37NO4	[M+H]+	HMDB0002250	Dodecanoylcarnitine	0.01
346.041	C9H14N3O8P||C9H14N3O8P	[M+Na]+||[M+Na]+	HMDB0000095||HMDB0240312	Cytidine monophosphate||Cytidine 3'-monophosphate	0.55||0.55
349.054	C10H13N4O8P	[M+H]+	HMDB0000175	Inosinic acid	-2.27
350.084	C14H17NO8	[M+Na]+	HMDB0010316	Acetaminophen glucuronide	-2.55
351.23	C22H32O2	[M+Na]+	HMDB0002183	Docosahexaenoic acid	0.43
352.042	C10H12N5O6P||C10H12N5O6P	[M+Na]+||[M+Na]+	HMDB0000058||HMDB0011616	Cyclic AMP||Adenosine 2',3'-cyclic phosphate	1.9||1.9
353.1	C11H16N2O8P	[M+NH4]+	HMDB0000229	Nicotinamide ribotide	3.99
353.947	C6H12N2O4Se2	[M+NH4]+	HMDB0004122	Selenocystine	0.7
358.091	C11H20N2O4S3	[M+NH4]+	HMDB0061113	Sulforaphane-N-acetylcysteine	-3.27
358.122	C12H21N3O8	[M+Na]+	HMDB0000489	Aspartylglycosamine	-0.49
362.232	C21H28O4	[M+NH4]+	HMDB0004029	11-Dehydrocorticosterone	-0.38
369.032	C10H13N2O11P	[M+H]+	HMDB0000218	Orotidylic acid	-2.38
369.25	C16H34NO5P	[M+NH4]+	HMDB0060061	Sphingosine 1-phosphate (d16:1-P)	-4.75
370.052	C10H14N5O7P||C10H14N5O7P	[M+Na]+||[M+Na]+	HMDB0000045||HMDB0003540	Adenosine monophosphate||3'-AMP	-0.33||-0.33
371.036	C10H13N4O8P	[M+Na]+	HMDB0000175	Inosinic acid	-1.81
372.075	C15H14O8S	[M+NH4]+	HMDB0059996	Dihydronaringenin-O-sulphate	1.2
372.311	C21H38O4||C21H38O4||C21H41NO4	[M+NH4]+||[M+NH4]+||[M+H]+	HMDB0011538||HMDB0011568||HMDB0005066	MG(0:0/18:2(9Z,12Z)/0:0)||MG(18:2(9Z,12Z)/0:0/0:0)||Tetradecanoylcarnitine	-0.43||-0.43||-0.44
381.131	C20H22O6	[M+Na]+	HMDB0035789	Matairesinol	-0.06
384.114	C14H17N5O8	[M+H]+	HMDB0000912	Succinyladenosine	-2.25
385.198	C21H30O5||C21H30O5	[M+Na]+||[M+Na]+	HMDB0000063||HMDB0000319	Cortisol||18-Hydroxycorticosterone	-0.49||-0.49
386.047	C10H14N5O8P	[M+Na]+	HMDB0001397	Guanosine monophosphate	-0.3
387.214	C21H32O5	[M+Na]+	HMDB0000903	Tetrahydrocortisone	-0.41
390.08	C11H20NO12P	[M+H]+	HMDB0006268	N-Acetylneuraminate 9-phosphate	1.48
391.014	C10H13N2O11P	[M+Na]+	HMDB0000218	Orotidylic acid	-2.11
398.327	C23H43NO4||C23H43NO4||C23H40O4||C23H40O4||C23H40O4||C23H40O4	[M+H]+||[M+H]+||[M+NH4]+||[M+NH4]+||[M+NH4]+||[M+NH4]+	HMDB0006317||HMDB0013207||HMDB0011546||HMDB0011547||HMDB0011576||HMDB0011577	trans-Hexadec-2-enoyl carnitine||9-Hexadecenoylcarnitine||MG(0:0/20:3(5Z,8Z,11Z)/0:0)||MG(0:0/20:3(8Z,11Z,14Z)/0:0)||MG(20:3(5Z,8Z,11Z)/0:0/0:0)||MG(20:3(8Z,11Z,14Z)/0:0/0:0)	0.17||0.17||0.17||0.17||0.17||0.17
400.342	C23H42O4||C23H42O4||C23H45NO4	[M+NH4]+||[M+NH4]+||[M+H]+	HMDB0011544||HMDB0011574||HMDB0000222	MG(0:0/20:2(11Z,14Z)/0:0)||MG(20:2(11Z,14Z)/0:0/0:0)||L-Palmitoylcarnitine	-0.14||-0.14||-0.14
401.266	C23H38O4||C23H38O4||C23H38O4||C23H38O4	[M+Na]+||[M+Na]+||[M+Na]+||[M+Na]+	HMDB0004666||HMDB0011549||HMDB0011578||HMDB0011579	2-Arachidonylglycerol||MG(0:0/20:4(8Z,11Z,14Z,17Z)/0:0)||MG(20:4(5Z,8Z,11Z,14Z)/0:0/0:0)||MG(20:4(8Z,11Z,14Z,17Z)/0:0/0:0)	0.49||0.49||0.49||0.49
406.096	C14H17N5O8	[M+Na]+	HMDB0000912	Succinyladenosine	-2.78
412.062	C11H20NO12P	[M+Na]+	HMDB0006268	N-Acetylneuraminate 9-phosphate	1.58
413.204	C18H28N4O7	[M+H]+	HMDB0000569	Deoxypyridinoline	2.34
421.111	C18H22O10||C18H22O10||C18H22O10||C18H22O10	[M+Na]+||[M+Na]+||[M+Na]+||[M+Na]+	HMDB0029190||HMDB0059988||HMDB0059990||HMDB0060030	5-(3',4'-dihydroxyphenyl)-gamma-valerolactone-3'-O-glucuronide||5-(3',4'-Dihydroxyphenyl)-gamma-valerolactone-3'-O-methyl-4'-O-glucuronide||5-(3',4'-Dihydroxyphenyl)-gamma-valerolactone-4'-O-methyl-3'-O-glucuronide||5-(3',5'-Dihydroxyphenyl)-gamma-valerolactone-O-glucuronide-O-methyl	1.38||1.38||1.38||1.38
423.323	C27H44O2||C27H44O2||C27H44O2	[M+Na]+||[M+Na]+||[M+Na]+	HMDB0000501||HMDB0001993||HMDB0003550	7-Ketocholesterol||7a-Hydroxy-cholestene-3-one||Calcidiol	-0.08||-0.08||-0.08
426.358	C25H47NO4||C25H47NO4||C25H47NO4||C25H47NO4||C25H47NO4	[M+H]+||[M+H]+||[M+H]+||[M+H]+||[M+H]+	HMDB0005065||HMDB0006464||HMDB0013337||HMDB0013338||HMDB0094687	Oleoylcarnitine||Elaidic carnitine||2-Hydroxyhexadecanoylcarnitine||11Z-Octadecenylcarnitine||Octadecenoylcarnitine	-0.07||-0.07||-0.07||-0.07||-0.07
428.374	C25H49NO4||C25H46O4||C25H46O4	[M+H]+||[M+NH4]+||[M+NH4]+	HMDB0000848||HMDB0011553||HMDB0011583	Stearoylcarnitine||MG(0:0/22:2(13Z,16Z)/0:0)||MG(22:2(13Z,16Z)/0:0/0:0)	0.22||0.22||0.22
435.251	C21H39O7P	[M+H]+	HMDB0007856	LysoPA(18:2(9Z,12Z)/0:0)	0.28
449.077	C13H22N4O8S2	[M+Na]+	HMDB0000656	Cysteineglutathione disulfide	0.71
449.127	C18H24O13	[M+H]+	HMDB0059970	4-Hydroxy-5-(3',4',5'-trihydroxyphenyl)-valeric acid-O-methyl-O-glucuronide	-3.55
453.163	C19H32O8S2||C19H32O8S2	[M+H]+||[M+H]+	HMDB0094682||HMDB0240625	5alpha-Androstan-3alpha,17beta-diol disulfate||5alpha-Androstan-3beta,17alpha-diol disulfate	3.57||3.57
457.272	C23H37NO5S	[M+NH4]+	HMDB0002200	Leukotriene E4	-3.06
464.13	C19H19N7O6	[M+Na]+	HMDB0000121	Folic acid	1.5
469.05	C11H20N4O11P2	[M+Na]+	HMDB0001564	CDP-Ethanolamine	0.56
471.11	C18H24O13	[M+Na]+	HMDB0059970	4-Hydroxy-5-(3',4',5'-trihydroxyphenyl)-valeric acid-O-methyl-O-glucuronide	-2.53
472.304	C26H43NO5||C26H43NO5||C26H43NO5	[M+Na]+||[M+Na]+||[M+Na]+	HMDB0000631||HMDB0000637||HMDB0000708	Deoxycholic acid glycine conjugate||Chenodeoxycholic acid glycine conjugate||Glycoursodeoxycholic acid	0.67||0.67||0.67
476.275	C21H44NO7P||C21H44NO7P||C23H42NO7P	[M+Na]+||[M+Na]+||[M+H]+	HMDB0011473||HMDB0011503||HMDB0011478	LysoPE(0:0/16:0)||LysoPE(16:0/0:0)||LysoPE(0:0/18:3(6Z,9Z,12Z))	0.62||0.62||-4.43
489.182	C18H32O15||C18H32O15	[M+H]+||[M+H]+	HMDB0002094||HMDB0002098	3-Fucosyllactose||2-Fucosyllactose	2.08||2.08
511.097	C14H26N4O11P2	[M+Na]+	HMDB0001413	Citicoline	0.51
542.491	C36H60O2	[M+NH4]+	HMDB0003648	Retinyl palmitate	-4.32
544.338	C26H52NO7P||C26H52NO7P||C26H52NO7P||C26H52NO7P||C28H50NO7P||C28H50NO7P	[M+Na]+||[M+Na]+||[M+Na]+||[M+Na]+||[M+H]+||[M+H]+	HMDB0002815||HMDB0010385||HMDB0061701||HMDB0062651||HMDB0010395||HMDB0010396	LysoPC(18:1(9Z))||LysoPC(18:1(11Z))||2-Oleoylglycerophosphocholine||2-oleoyl-sn-glycero-3-phosphocholine||LysoPC(20:4(5Z,8Z,11Z,14Z))||LysoPC(20:4(8Z,11Z,14Z,17Z))	0.27||0.27||0.27||0.27||-4.15||-4.15
562.196	C24H32O12S	[M+NH4]+	HMDB0010356	Estriol 3-sulfate 16-glucuronide	0.81
565.262	C27H42O11	[M+Na]+	HMDB0010320	Cortolone-3-glucuronide	-0.02
585.25	C34H34N4O4	[M+Na]+	HMDB0000241	Protoporphyrin IX	4.83
585.27	C33H36N4O6	[M+H]+	HMDB0000054	Bilirubin	-1.54
607.252	C33H36N4O6	[M+Na]+	HMDB0000054	Bilirubin	-1.55

## Sheet: S-3b-polarnegative
measured m/z	molecular formula	adduct	HMDB ID	putative name	mass error (ppm)
88.0405	C3H7NO2||C3H7NO2||C3H7NO2||C3H7NO2||C3H7NO2	[M-H]-||[M-H]-||[M-H]-||[M-H]-||[M-H]-	HMDB0000056||HMDB0000161||HMDB0000271||HMDB0001310||HMDB0062251	beta-Alanine||L-Alanine||Sarcosine||D-Alanine||(alpha-D-mannosyl)7-beta-D-mannosyl-diacetylchitobiosyl-L-asparagine, isoform A (protein)	1.48||1.48||1.48||1.48||1.48
102.056	C4H9NO2||C4H9NO2||C4H9NO2||C4H9NO2||C4H9NO2||C4H9NO2||C4H9NO2||C4H9NO2||C4H9NO2||C4H9NO2||C4H9NO2	[M-H]-||[M-H]-||[M-H]-||[M-H]-||[M-H]-||[M-H]-||[M-H]-||[M-H]-||[M-H]-||[M-H]-||[M-H]-	HMDB0000092||HMDB0000112||HMDB0000452||HMDB0000650||HMDB0001906||HMDB0002166||HMDB0002299||HMDB0003911||HMDB0031654||HMDB0094692||HMDB0094693	Dimethylglycine||gamma-Aminobutyric acid||L-alpha-Aminobutyric acid||D-alpha-Aminobutyric acid||2-Aminoisobutyric acid||(S)-b-aminoisobutyric acid||(R)-b-aminoisobutyric acid||3-Aminoisobutanoic acid||3-Aminobutanoic acid||N-Methylalanine||3-Aminobutyrate	0.12||0.12||0.12||0.12||0.12||0.12||0.12||0.12||0.12||0.12||0.12
104.035	C3H7NO3||C3H7NO3	[M-H]-||[M-H]-	HMDB0000187||HMDB0003406	L-Serine||D-Serine	1.33||1.33
115.004	C4H4O4||C4H4O4	[M-H]-||[M-H]-	HMDB0000134||HMDB0000176	Fumaric acid||Maleic acid	1.48||1.48
118.051	C4H9NO3||C4H9NO3||C4H9NO3||C4H9NO3	[M-H]-||[M-H]-||[M-H]-||[M-H]-	HMDB0000167||HMDB0000719||HMDB0004041||HMDB0061877	L-Threonine||L-Homoserine||L-Allothreonine||4-Amino-3-hydroxybutyrate	0.74||0.74||0.74||0.74
120.013	C3H7NO2S||C3H7NO2S	[M-H]-||[M-H]-	HMDB0000574||HMDB0003417	L-Cysteine||D-Cysteine	0.75||0.75
122.985	C3H4O3||C3H4O3	[M+Cl]-||[M+Cl]-	HMDB0000243||HMDB0011111	Pyruvic acid||Malonic semialdehyde	-0.3||-0.3
124.007	C2H7NO3S	[M-H]-	HMDB0000251	Taurine	-0.08
127.051	C5H8N2O2||C5H8N2O2||C3H4N2	[M-H]-||[M-H]-||[M+Hac-H]-	HMDB0000079||HMDB0062558||HMDB0001525	Dihydrothymine||Pyroglutamine||Imidazole	0.75||0.75||0.76
128.018	C5H7NOS	[M-H]-	HMDB0033561	2-Acetyl-4,5-dihydrothiazole	0.84
130.062	C4H9N3O2||C4H9N3O2	[M-H]-||[M-H]-	HMDB0000064||HMDB0013222	Creatine||Beta-Guanidinopropionic acid	0.95||0.95
131.046	C4H8N2O3||C4H8N2O3||C4H8N2O3||C4H8N2O3||C4H8N2O3	[M-H]-||[M-H]-||[M-H]-||[M-H]-||[M-H]-	HMDB0000026||HMDB0000168||HMDB0011733||HMDB0012265||HMDB0062812	Ureidopropionic acid||L-Asparagine||Glycyl-glycine||N-Carbamoylsarcosine||N-carbamoyl-beta-alaninate	1.23||1.23||1.23||1.23||1.23
132.013	C4H7NO2S	[M-H]-	HMDB0062164	Thioproline	0.9
132.03	C4H7NO4||C4H7NO4||C4H7NO4	[M-H]-||[M-H]-||[M-H]-	HMDB0000191||HMDB0006483||HMDB0011753	L-Aspartic acid||D-Aspartic acid||Iminodiacetic acid	0.79||0.79||0.79
133.014	C2H2O3||C4H6O5||C4H6O5||C4H6O5	[M+Hac-H]-||[M-H]-||[M-H]-||[M-H]-	HMDB0000119||HMDB0000156||HMDB0000744||HMDB0031518	Glyoxylic acid||L-Malic acid||Malic acid||D-Malic acid	1.19||1.19||1.19||1.19
135.03	C2H4O3||C4H8O5||C4H8O5||C4H8O5	[M+Hac-H]-||[M-H]-||[M-H]-||[M-H]-	HMDB0000115||HMDB0000613||HMDB0000943||HMDB0062620	Glycolic acid||Erythronic acid||Threonic acid||L-threonic Acid	0.84||0.84||0.84||0.84
135.056	C7H8N2O	[M-H]-	HMDB0003152	N-Methylnicotinamide	0.8
138.056	C5H5N	[M+Hac-H]-	HMDB0000926	Pyridine	1.28
140.012	C3H7NO3||C3H7NO3||C2H8NO4P	[M+Cl]-||[M+Cl]-||[M-H]-	HMDB0000187||HMDB0003406||HMDB0000224	L-Serine||D-Serine||O-Phosphoethanolamine	0.49||0.49||1.74
143.046	C3H4N2O	[M+Hac-H]-	HMDB0004363	Imidazolone	0.34
144.03	C5H7NO4	[M-H]-	HMDB0001552	2-Keto-glutaramic acid	0.65
145.062	C5H10N2O3||C5H10N2O3||C5H10N2O3||C5H10N2O3	[M-H]-||[M-H]-||[M-H]-||[M-H]-	HMDB0000641||HMDB0002031||HMDB0003423||HMDB0006899	L-Glutamine||Ureidoisobutyric acid||D-Glutamine||Alanylglycine	-0.12||-0.12||-0.12||-0.12
146.046	C3H5NO2||C5H9NO4||C5H9NO4||C5H9NO4||C5H9NO4||C5H9NO4	[M+Hac-H]-||[M-H]-||[M-H]-||[M-H]-||[M-H]-||[M-H]-	HMDB0003609||HMDB0000148||HMDB0002931||HMDB0003011||HMDB0003339||HMDB0060475	2-Aminoacrylic acid||L-Glutamic acid||N-Acetylserine||O-Acetylserine||D-Glutamic acid||DL-Glutamate	-0.48||-0.49||-0.49||-0.49||-0.49||-0.49
146.082	C6H13NO3	[M-H]-	HMDB0033453	Fagomine	0.2
148.044	C5H11NO2S||C5H11NO2S	[M-H]-||[M-H]-	HMDB0000696||HMDB0033951	L-Methionine||Racemethionine	0.51||0.51
150.98	C4H4O4||C4H4O4	[M+Cl]-||[M+Cl]-	HMDB0000134||HMDB0000176	Fumaric acid||Maleic acid	0.08||0.08
152.002	C3H7NO4S||C3H7NO4S	[M-H]-||[M-H]-	HMDB0000996||HMDB0060179	3-Sulfinoalanine||3-Sulfinato-L-alaninate	0.73||0.73
152.012	C4H7NO3	[M+Cl]-	HMDB0000532	Acetylglycine	-0.4
152.048	C5H11NO2||C5H11NO2||C5H11NO2	[M+Cl]-||[M+Cl]-||[M+Cl]-	HMDB0000883||HMDB0003355||HMDB0013716	L-Valine||5-Aminopentanoic acid||Norvaline	0.77||0.77||0.77
152.996	C4H6O4||C4H6O4||C4H6O4	[M+Cl]-||[M+Cl]-||[M+Cl]-	HMDB0000202||HMDB0000254||HMDB0000940	Methylmalonic acid||Succinic acid||Threonolactone	-0.35||-0.35||-0.35
154.028	C4H9NO3||C4H9NO3||C4H9NO3||C4H9NO3	[M+Cl]-||[M+Cl]-||[M+Cl]-||[M+Cl]-	HMDB0000167||HMDB0000719||HMDB0004041||HMDB0061877	L-Threonine||L-Homoserine||L-Allothreonine||4-Amino-3-hydroxybutyrate	-0.3||-0.3||-0.3||-0.3
154.062	C6H9N3O2	[M-H]-	HMDB0000177	L-Histidine	0.72
155.046	C6H8N2O3	[M-H]-	HMDB0002320	Imidazolelactic acid	0.67
162.023	C5H9NO3S	[M-H]-	HMDB0001890	Acetylcysteine	0.62
164.039	C5H11NO3S	[M-H]-	HMDB0002005	Methionine sulfoxide	0.77
166.018	C4H9NO4S	[M-H]-	HMDB0240253	N-Acetyltaurine	0.76
167.021	C5H4N4O3||C3H8S2	[M-H]-||[M+Hac-H]-	HMDB0000289||HMDB0031317	Uric acid||Bis(methylthio)methane	0.86||3.66
167.046	C7H8N2O3	[M-H]-	HMDB0013159	2,3-Diaminosalicylic acid	0.8
171.006	CH5O4P||C3H9O6P||C3H9O6P	[M+Hac-H]-||[M-H]-||[M-H]-	HMDB0061711||HMDB0000126||HMDB0002520	Methylphosphate||Glycerol 3-phosphate||Beta-Glycerophosphoric acid	-4.14||-4.14||-4.14
171.007	C4H8O5||C4H8O5||C4H8O5||C3H9O6P||C3H9O6P||CH5O4P	[M+Cl]-||[M+Cl]-||[M+Cl]-||[M-H]-||[M-H]-||[M+Hac-H]-	HMDB0000613||HMDB0000943||HMDB0062620||HMDB0000126||HMDB0002520||HMDB0061711	Erythronic acid||Threonic acid||L-threonic Acid||Glycerol 3-phosphate||Beta-Glycerophosphoric acid||Methylphosphate	1.53||1.53||1.53||2.55||2.55||2.55
171.008	C5H4N4O	[M+Cl]-	HMDB0000157	Hypoxanthine	-1.33
171.042	C6H8N2O4||C4H4N2O2	[M-H]-||[M+Hac-H]-	HMDB0001212||HMDB0000300	Hydantoin-5-propionic acid||Uracil	2.46||2.46
171.078	C7H12N2O3||C7H12N2O3	[M-H]-||[M-H]-	HMDB0000721||HMDB0011178	Glycylproline||Prolylglycine	2.47||2.47
173.01	C6H6O6||C6H6O6||C6H6O6	[M-H]-||[M-H]-||[M-H]-	HMDB0000072||HMDB0000958||HMDB0001264	cis-Aconitic acid||trans-Aconitic acid||Dehydroascorbic acid	2.48||2.48||2.48
173.057	C6H10N2O4||C6H10N2O4||C4H6N2O2||C4H6N2O2	[M-H]-||[M-H]-||[M+Hac-H]-||[M+Hac-H]-	HMDB0000854||HMDB0006028||HMDB0000076||HMDB0003646	Formiminoglutamic acid||N-Acetylasparagine||Dihydrouracil||N-Methylhydantoin	2.47||2.47||2.48||2.48
175.073	C6H12N2O4	[M-H]-	HMDB0028851	Glycyl-Threonine	2.33
175.989	C2H8NO4P	[M+Cl]-	HMDB0000224	O-Phosphoethanolamine	2.37
176.039	C6H11NO3S||C4H7NOS	[M-H]-||[M+Hac-H]-	HMDB0001015||HMDB0002287	N-Formyl-L-methionine||Homocysteine thiolactone	2.34||2.34
176.056	C4H7NO3	[M+Hac-H]-	HMDB0000532	Acetylglycine	-4.31
176.057	C4H7NO3	[M+Hac-H]-	HMDB0000532	Acetylglycine	2.33
176.092	C5H11NO2||C5H11NO2||C5H11NO2	[M+Hac-H]-||[M+Hac-H]-||[M+Hac-H]-	HMDB0000883||HMDB0003355||HMDB0013716	L-Valine||5-Aminopentanoic acid||Norvaline	-3.85||-3.85||-3.85
176.093	C5H11NO2||C5H11NO2||C5H11NO2	[M+Hac-H]-||[M+Hac-H]-||[M+Hac-H]-	HMDB0000883||HMDB0003355||HMDB0013716	L-Valine||5-Aminopentanoic acid||Norvaline	2.32||2.32||2.32
177.023	C6H10O4S	[M-H]-	HMDB0240388	2,3-Dihydroxy-5-methylthio-4-pentenoic acid	2.21
177.034	C5H10N2O3S	[M-H]-	HMDB0000078	Cysteinylglycine	2.24
179.047	C8H8N2O3||C8H8N2O3	[M-H]-||[M-H]-	HMDB0003269||HMDB0059766	Nicotinuric acid||Picolinoylglycine	2.0||2.0
179.055	C4H8O4||C4H8O4||C4H8O4||C4H8O4||C4H8O4||C4H8O4||C4H8O4||C6H12O6||C6H12O6||C6H12O6||C6H12O6||C6H12O6||C6H12O6||C6H12O6||C6H12O6||C6H12O6||C6H12O6||C6H12O6||C6H12O6||C6H12O6||C6H12O6||C6H12O6||C6H12O6||C6H12O6	[M+Hac-H]-||[M+Hac-H]-||[M+Hac-H]-||[M+Hac-H]-||[M+Hac-H]-||[M+Hac-H]-||[M+Hac-H]-||[M-H]-||[M-H]-||[M-H]-||[M-H]-||[M-H]-||[M-H]-||[M-H]-||[M-H]-||[M-H]-||[M-H]-||[M-H]-||[M-H]-||[M-H]-||[M-H]-||[M-H]-||[M-H]-||[M-H]-	HMDB0000337||HMDB0000360||HMDB0000498||HMDB0002453||HMDB0002601||HMDB0002649||HMDB0006293||HMDB0000122||HMDB0000143||HMDB0000169||HMDB0000211||HMDB0000516||HMDB0000660||HMDB0001151||HMDB0001266||HMDB0003345||HMDB0003418||HMDB0003449||HMDB0006088||HMDB0033704||HMDB0034220||HMDB0061922||HMDB0240209||HMDB0240211	(S)-3,4-Dihydroxybutyric acid||2,4-Dihydroxybutanoic acid||4-Deoxyerythronic acid||4-Deoxythreonic acid||A,b-Dihydroxyisobutyric acid||Erythrose||L-Erythrulose||D-Glucose||D-Galactose||D-Mannose||myo-Inositol||Beta-D-Glucose||D-Fructose||Allose||L-Sorbose||Alpha-D-Glucose||D-Tagatose||Beta-D-Galactose||scyllo-Inositol||L-Galactose||Levoinositol||Alpha-D-Glucopyranoside||D-chiro-inositol||allo-ino…	-4.68||-4.68||-4.68||-4.68||-4.68||-4.68||-4.68||-4.68||-4.68||-4.68||-4.68||-4.68||-4.68||-4.68||-4.68||-4.68||-4.68||-4.68||-4.68||-4.68||-4.68||-4.68||-4.68||-4.68
179.056	C6H12O6||C6H12O6||C6H12O6||C6H12O6||C6H12O6||C6H12O6||C6H12O6||C6H12O6||C6H12O6||C6H12O6||C6H12O6||C6H12O6||C6H12O6||C6H12O6||C6H12O6||C6H12O6||C6H12O6||C4H8O4||C4H8O4||C4H8O4||C4H8O4||C4H8O4||C4H8O4||C4H8O4	[M-H]-||[M-H]-||[M-H]-||[M-H]-||[M-H]-||[M-H]-||[M-H]-||[M-H]-||[M-H]-||[M-H]-||[M-H]-||[M-H]-||[M-H]-||[M-H]-||[M-H]-||[M-H]-||[M-H]-||[M+Hac-H]-||[M+Hac-H]-||[M+Hac-H]-||[M+Hac-H]-||[M+Hac-H]-||[M+Hac-H]-||[M+Hac-H]-	HMDB0000122||HMDB0000143||HMDB0000169||HMDB0000211||HMDB0000516||HMDB0000660||HMDB0001151||HMDB0001266||HMDB0003345||HMDB0003418||HMDB0003449||HMDB0006088||HMDB0033704||HMDB0034220||HMDB0061922||HMDB0240209||HMDB0240211||HMDB0000337||HMDB0000360||HMDB0000498||HMDB0002453||HMDB0002601||HMDB0002649||HMDB0006293	D-Glucose||D-Galactose||D-Mannose||myo-Inositol||Beta-D-Glucose||D-Fructose||Allose||L-Sorbose||Alpha-D-Glucose||D-Tagatose||Beta-D-Galactose||scyllo-Inositol||L-Galactose||Levoinositol||Alpha-D-Glucopyranoside||D-chiro-inositol||allo-inositol||(S)-3,4-Dihydroxybutyric acid||2,4-Dihydroxybutanoic acid||4-Deoxyerythronic acid||4-Deoxythreonic acid||A,b-Dihydroxyisobutyric acid||Erythrose||L-Erythr…	1.68||1.68||1.68||1.68||1.68||1.68||1.68||1.68||1.68||1.68||1.68||1.68||1.68||1.68||1.68||1.68||1.68||1.68||1.68||1.68||1.68||1.68||1.68||1.68
181.038	C5H10N2O3||C5H10N2O3||C5H10N2O3||C5H10N2O3	[M+Cl]-||[M+Cl]-||[M+Cl]-||[M+Cl]-	HMDB0000641||HMDB0002031||HMDB0003423||HMDB0006899	L-Glutamine||Ureidoisobutyric acid||D-Glutamine||Alanylglycine	-4.71||-4.71||-4.71||-4.71
181.039	C5H10N2O3||C5H10N2O3||C5H10N2O3||C5H10N2O3	[M+Cl]-||[M+Cl]-||[M+Cl]-||[M+Cl]-	HMDB0000641||HMDB0002031||HMDB0003423||HMDB0006899	L-Glutamine||Ureidoisobutyric acid||D-Glutamine||Alanylglycine	1.33||1.33||1.33||1.33
182.023	C5H9NO4||C5H9NO4||C5H9NO4||C5H9NO4||C5H9NO4	[M+Cl]-||[M+Cl]-||[M+Cl]-||[M+Cl]-||[M+Cl]-	HMDB0000148||HMDB0002931||HMDB0003011||HMDB0003339||HMDB0060475	L-Glutamic acid||N-Acetylserine||O-Acetylserine||D-Glutamic acid||DL-Glutamate	1.35||1.35||1.35||1.35||1.35
182.045	C6H5NO2||C6H5NO2||C8H9NO4	[M+Hac-H]-||[M+Hac-H]-||[M-H]-	HMDB0001488||HMDB0002243||HMDB0000017	Nicotinic acid||Picolinic acid||4-Pyridoxic acid	-4.88||-4.88||-4.88
182.046	C8H9NO4||C6H5NO2||C6H5NO2	[M-H]-||[M+Hac-H]-||[M+Hac-H]-	HMDB0000017||HMDB0001488||HMDB0002243	4-Pyridoxic acid||Nicotinic acid||Picolinic acid	1.31||1.31||1.31
182.059	C6H13NO3	[M+Cl]-	HMDB0033453	Fagomine	0.27
184.038	C2H8NO3P	[M+Hac-H]-	HMDB0011747	Ciliatine	1.7
184.039	C6H7N5||C6H7N5	[M+Cl]-||[M+Cl]-	HMDB0011599||HMDB0011600	1-Methyladenine||3-Methyladenine	-1.59||-1.59
184.109	C6H11N3||C6H11N3	[M+Hac-H]-||[M+Hac-H]-	HMDB0000898||HMDB0001861	1-Methylhistamine||3-Methylhistamine	1.44||1.44
184.986	C4H6O6||C3H7O7P||C3H7O7P||C3H7O7P||C3H7O7P	[M+Cl]-||[M-H]-||[M-H]-||[M-H]-||[M-H]-	HMDB0000956||HMDB0000362||HMDB0000807||HMDB0003391||HMDB0060180	Tartaric acid||2-Phosphoglyceric acid||3-Phosphoglyceric acid||2-Phospho-D-glyceric acid||(2R)-2-Hydroxy-3-(phosphonatooxy)propanoate	0.19||1.13||1.13||1.13||1.13
185.022	C5H10O5||C5H10O5||C5H10O5||C5H10O5||C5H10O5||C5H10O5||C5H10O5||C5H10O5||C5H10O5||C5H10O5||C5H10O5||C5H10O5||C2H7O4P||C6H14S2	[M+Cl]-||[M+Cl]-||[M+Cl]-||[M+Cl]-||[M+Cl]-||[M+Cl]-||[M+Cl]-||[M+Cl]-||[M+Cl]-||[M+Cl]-||[M+Cl]-||[M+Cl]-||[M+Hac-H]-||[M+Cl]-	HMDB0000098||HMDB0000283||HMDB0000366||HMDB0000621||HMDB0000646||HMDB0000646||HMDB0000751||HMDB0001644||HMDB0003371||HMDB0012325||HMDB0029942||HMDB0059753||HMDB0061734||HMDB0031472	D-Xylose||D-Ribose||2-Deoxyribonic acid||D-Ribulose||L-Arabinose||beta-Arabinose||L-Threo-2-pentulose||D-Xylulose||L-Ribulose||Arabinofuranose||D-Arabinose||2-Deoxypentonic acid||Dimethylphosphate||Dipropyl disulfide	0.89||0.89||0.89||0.89||0.89||0.89||0.89||0.89||0.89||0.89||0.89||0.89||1.84||-3.81
185.057	C7H10N2O4||C5H6N2O2||C5H6N2O2	[M-H]-||[M+Hac-H]-||[M+Hac-H]-	HMDB0061890||HMDB0000262||HMDB0002024	Pyroglutamylglycine||Thymine||Imidazoleacetic acid	0.98||0.99||0.99
187.038	C5H12O5||C5H12O5||C5H12O5||C5H12O5	[M+Cl]-||[M+Cl]-||[M+Cl]-||[M+Cl]-	HMDB0000508||HMDB0000568||HMDB0001851||HMDB0002917	Ribitol||D-Arabitol||L-Arabitol||D-Xylitol	1.16||1.16||1.16||1.16
187.073	C7H12N2O4||C5H8N2O2||C5H8N2O2	[M-H]-||[M+Hac-H]-||[M+Hac-H]-	HMDB0006029||HMDB0000079||HMDB0062558	N-Acetylglutamine||Dihydrothymine||Pyroglutamine	0.86||0.86||0.86
189.052	C6H10N2O5||C9H14S	[M-H]-||[M+Cl]-	HMDB0015673||HMDB0040240	Carglumic acid||2-Pentylthiophene	0.77||4.32
190.051	C10H9NO3||C10H9NO3||C10H9NO3	[M-H]-||[M-H]-||[M-H]-	HMDB0000763||HMDB0035514||HMDB0094657	5-Hydroxyindoleacetic acid||xi-2,3-Dihydro-2-oxo-1H-indole-3-acetic acid||2-Oxindole-3-acetate	0.83||0.83||0.83
190.054	C7H13NO3S	[M-H]-	HMDB0011745	N-Acetyl-L-methionine	0.83
192.034	C4H7NO2S	[M+Hac-H]-	HMDB0062164	Thioproline	0.81
193.036	C6H10O7||C6H10O7||C6H10O7||C6H10O7||C6H10O7||C6H10O7||C6H10O7||C4H6O5||C4H6O5||C4H6O5	[M-H]-||[M-H]-||[M-H]-||[M-H]-||[M-H]-||[M-H]-||[M-H]-||[M+Hac-H]-||[M+Hac-H]-||[M+Hac-H]-	HMDB0000127||HMDB0002545||HMDB0002704||HMDB0003363||HMDB0003402||HMDB0011731||HMDB0011732||HMDB0000156||HMDB0000744||HMDB0031518	D-Glucuronic acid||Galacturonic acid||Iduronic acid||Pectic acid||Pectin||5-Keto-D-gluconate||2-Keto-L-gluconate||L-Malic acid||Malic acid||D-Malic acid	0.97||0.97||0.97||0.97||0.97||0.97||0.97||0.98||0.98||0.98
193.062	C9H10N2O3||C9H10N2O3	[M-H]-||[M-H]-	HMDB0001867||HMDB0059723	4-Aminohippuric acid||Pyridylacetylglycine	0.89||0.89
194.059	C7H13NO3||C7H13NO3||C7H13NO3||C7H13NO3||C7H13NO3||C7H13NO3||C7H13NO3||C7H13NO3	[M+Cl]-||[M+Cl]-||[M+Cl]-||[M+Cl]-||[M+Cl]-||[M+Cl]-||[M+Cl]-||[M+Cl]-	HMDB0000339||HMDB0000678||HMDB0000927||HMDB0011757||HMDB0012154||HMDB0012175||HMDB0029412||HMDB0061678	2-Methylbutyrylglycine||Isovalerylglycine||Valerylglycine||N-Acetylvaline||3-Dehydrocarnitine||5-Acetamidovalerate||Betonicine||Methyl 5-(hydroxymethyl)pyrrolidine-3-carboxylate	0.46||0.46||0.46||0.46||0.46||0.46||0.46||0.46
195.051	C6H12O7||C6H12O7||C6H12O7||C4H8O5||C4H8O5||C4H8O5	[M-H]-||[M-H]-||[M-H]-||[M+Hac-H]-||[M+Hac-H]-||[M+Hac-H]-	HMDB0000565||HMDB0000625||HMDB0003290||HMDB0000613||HMDB0000943||HMDB0062620	Galactonic acid||Gluconic acid||Gulonic acid||Erythronic acid||Threonic acid||L-threonic Acid	1.06||1.06||1.06||1.07||1.07||1.07
196.038	C6H11NO4||C6H11NO4||C6H11NO4||C6H11NO4||C6H11NO4||C6H11NO4	[M+Cl]-||[M+Cl]-||[M+Cl]-||[M+Cl]-||[M+Cl]-||[M+Cl]-	HMDB0000510||HMDB0029423||HMDB0061715||HMDB0062557||HMDB0062660||HMDB0094716	Aminoadipic acid||Acetylhomoserine||Glutamate, gamma-methyl ester||N-Acetylthreonine||N-methyl-L-glutamic Acid||hydroxybutyrylglycine	0.18||0.18||0.18||0.18||0.18||0.18
196.073	C8H11N3O3	[M-H]-	HMDB0032055	N-Acetylhistidine	1.87
196.075	C7H15NO3	[M+Cl]-	HMDB0000062	L-Carnitine	1.03
197.034	C5H10N2O4	[M+Cl]-	HMDB0028850	Glycyl-Serine	0.91
197.057	C6H6N2O2||C6H6N2O2||C6H6N2O2	[M+Hac-H]-||[M+Hac-H]-||[M+Hac-H]-	HMDB0000301||HMDB0002730||HMDB0062562	Urocanic acid||Nicotinamide N-oxide||Trans-urocanate	1.11||1.11||1.11
199.016	C9H8O3||C9H8O3||C9H8O3||C9H8O3||C9H8O3||C9H8O3||C9H8O3	[M+Cl]-||[M+Cl]-||[M+Cl]-||[M+Cl]-||[M+Cl]-||[M+Cl]-||[M+Cl]-	HMDB0000205||HMDB0001713||HMDB0002035||HMDB0002641||HMDB0012225||HMDB0030677||HMDB0041592	Phenylpyruvic acid||m-Coumaric acid||4-Hydroxycinnamic acid||2-Hydroxycinnamic acid||Enol-phenylpyruvate||cis-p-Coumaric acid||Coumaric acid	-3.36||-3.36||-3.36||-3.36||-3.36||-3.36||-3.36
199.038	C6H12O5||C6H12O5||C6H12O5||C6H12O5||C6H12O5	[M+Cl]-||[M+Cl]-||[M+Cl]-||[M+Cl]-||[M+Cl]-	HMDB0000174||HMDB0000849||HMDB0002712||HMDB0010207||HMDB0029196	L-Fucose||Rhamnose||1,5-Anhydrosorbitol||L-Rhamnulose||D-Fucose	0.26||0.26||0.26||0.26||0.26
201.052	C5H6N2O3	[M+Hac-H]-	HMDB0000469	5-Hydroxymethyluracil	1.19
201.088	C8H14N2O4||C8H14N2O4	[M-H]-||[M-H]-	HMDB0029026||HMDB0029047	Prolyl-Serine||Serylproline	0.91||0.91
201.125	C9H18N2O3||C9H18N2O3||C9H18N2O3||C9H18N2O3	[M-H]-||[M-H]-||[M-H]-||[M-H]-	HMDB0028690||HMDB0028691||HMDB0028900||HMDB0028922	Alanyl-Isoleucine||Alanyl-Leucine||Isoleucyl-Alanine||Leucyl-Alanine	0.89||0.89||0.89||0.89
203.068	C7H12N2O5	[M-H]-	HMDB0011667	gamma-Glutamylglycine	0.81
204.981	C6H6O6S||C6H6O6S	[M-H]-||[M-H]-	HMDB0060016||HMDB0060018	Pyrogallol-1-O-sulphate||Pyrogallol-2-O-sulphate	1.12||1.12
207.078	C10H12N2O3||C10H12N2O3	[M-H]-||[M-H]-	HMDB0000684||HMDB0012948	L-Kynurenine||Formyl-5-hydroxykynurenamine	1.04||1.04
209.03	C6H10O8||C6H10O8||C4H6O6	[M-H]-||[M-H]-||[M+Hac-H]-	HMDB0000639||HMDB0000663||HMDB0000956	Galactaric acid||Glucaric acid||Tartaric acid	0.78||0.78||0.78
209.111	C13H18	[M+Cl]-	HMDB0061824	1-Methyl-4-(1-methyl-2-propenyl)-benzene	4.76
210.029	C5H9N3O4||C4H10N3O5P	[M+Cl]-||[M-H]-	HMDB0003157||HMDB0001511	Guanidinosuccinic acid||Phosphocreatine	0.1||0.93
211.001	C6H8O6||C6H8O6	[M+Cl]-||[M+Cl]-	HMDB0000044||HMDB0031193	Ascorbic acid||1,2,3-Propanetricarboxylic acid	0.02||0.02
211.073	C7H8N2O2||C7H8N2O2	[M+Hac-H]-||[M+Hac-H]-	HMDB0004193||HMDB0004194	N1-Methyl-2-pyridone-5-carboxamide||N1-Methyl-4-pyridone-3-carboxamide	0.8||0.8
212.024	C3H7NO4S||C3H7NO4S	[M+Hac-H]-||[M+Hac-H]-	HMDB0000996||HMDB0060179	3-Sulfinoalanine||3-Sulfinato-L-alaninate	0.49||0.49
213.017	C6H10O6||C6H10O6||C6H10O6	[M+Cl]-||[M+Cl]-||[M+Cl]-	HMDB0000150||HMDB0001353||HMDB0003466	Gluconolactone||2-Keto-3-deoxy-D-gluconic acid||L-Gulonolactone	0.34||0.34||0.34
213.069	C11H14O2	[M+Cl]-	HMDB0002043	5-Phenylvaleric acid	0.06
214.049	C5H14NO6P||C6H13NO5||C6H13NO5	[M-H]-||[M+Cl]-||[M+Cl]-	HMDB0000114||HMDB0001514||HMDB0002030	Glycerylphosphorylethanolamine||Glucosamine||Fructosamine	0.2||-0.63||-0.63
217.083	C8H14N2O5||C8H14N2O5||C8H14N2O5	[M-H]-||[M-H]-||[M-H]-	HMDB0006248||HMDB0028686||HMDB0036301	gamma-Glutamylalanine||Alanyl-Glutamic acid||N-gamma-L-Glutamyl-D-alanine	0.54||0.54||0.54
218.023	C8H9NO4	[M+Cl]-	HMDB0000017	4-Pyridoxic acid	0.32
218.104	C9H17NO5||C7H13NO3||C7H13NO3||C7H13NO3||C7H13NO3||C7H13NO3||C7H13NO3||C7H13NO3||C7H13NO3	[M-H]-||[M+Hac-H]-||[M+Hac-H]-||[M+Hac-H]-||[M+Hac-H]-||[M+Hac-H]-||[M+Hac-H]-||[M+Hac-H]-||[M+Hac-H]-	HMDB0000210||HMDB0000339||HMDB0000678||HMDB0000927||HMDB0011757||HMDB0012154||HMDB0012175||HMDB0029412||HMDB0061678	Pantothenic acid||2-Methylbutyrylglycine||Isovalerylglycine||Valerylglycine||N-Acetylvaline||3-Dehydrocarnitine||5-Acetamidovalerate||Betonicine||Methyl 5-(hydroxymethyl)pyrrolidine-3-carboxylate	0.62||0.63||0.63||0.63||0.63||0.63||0.63||0.63||0.63
221.06	C7H14N2O4S	[M-H]-	HMDB0000099	L-Cystathionine	0.79
221.067	C8H14O7||C6H10O5||C6H10O5||C6H10O5||C6H10O5||C6H10O5	[M-H]-||[M+Hac-H]-||[M+Hac-H]-||[M+Hac-H]-||[M+Hac-H]-||[M+Hac-H]-	HMDB0010325||HMDB0000321||HMDB0000345||HMDB0000355||HMDB0059737||HMDB0059758	Ethyl glucuronide||2-Hydroxyadipic acid||3-Hydroxyadipic acid||3-Hydroxymethylglutaric acid||3-Methyl-3-hydroxypentanedioate||2-Hydroxy-2-ethylsuccinic acid	0.73||0.74||0.74||0.74||0.74||0.74
222.064	C6H5N5O	[M+Hac-H]-	HMDB0000802	Pterin	1.82
228.099	C7H11N3O2||C7H11N3O2	[M+Hac-H]-||[M+Hac-H]-	HMDB0000001||HMDB0000479	1-Methylhistidine||3-Methylhistidine	0.87||0.87
229.012	C6H10O7||C6H10O7||C6H10O7||C6H10O7||C6H10O7||C6H10O7||C6H10O7||C3H7O6P||C3H7O6P||C5H11O8P||C5H11O8P||C5H11O8P||C5H11O8P	[M+Cl]-||[M+Cl]-||[M+Cl]-||[M+Cl]-||[M+Cl]-||[M+Cl]-||[M+Cl]-||[M+Hac-H]-||[M+Hac-H]-||[M-H]-||[M-H]-||[M-H]-||[M-H]-	HMDB0000127||HMDB0002545||HMDB0002704||HMDB0003363||HMDB0003402||HMDB0011731||HMDB0011732||HMDB0001112||HMDB0001473||HMDB0000618||HMDB0000868||HMDB0001489||HMDB0001548	D-Glucuronic acid||Galacturonic acid||Iduronic acid||Pectic acid||Pectin||5-Keto-D-gluconate||2-Keto-L-gluconate||D-Glyceraldehyde 3-phosphate||Dihydroxyacetone phosphate||D-Ribulose 5-phosphate||Xylulose 5-phosphate||Ribose 1-phosphate||D-Ribose 5-phosphate	0.2||0.2||0.2||0.2||0.2||0.2||0.2||0.97||0.97||0.97||0.97||0.97||0.97
229.027	C10H10O4||C10H10O4||C10H10O4||C10H10O4	[M+Cl]-||[M+Cl]-||[M+Cl]-||[M+Cl]-	HMDB0000954||HMDB0000955||HMDB0059721||HMDB0061686	trans-Ferulic acid||Isoferulic acid||mono-Benzyl malonate||2,5-Dihydroxycinnamic acid methyl ester	-3.24||-3.24||-3.24||-3.24
229.049	C7H14O6||C7H14O6	[M+Cl]-||[M+Cl]-	HMDB0029965||HMDB0034219	Methyl beta-D-glucopyranoside||D-Pinitol	0.74||0.74
229.156	C11H22N2O3||C11H22N2O3||C11H22N2O3||C11H22N2O3	[M-H]-||[M-H]-||[M-H]-||[M-H]-	HMDB0028920||HMDB0028942||HMDB0029130||HMDB0029131	Isoleucyl-Valine||Leucyl-Valine||Valyl-Isoleucine||Valyl-Leucine	0.82||0.82||0.82||0.82
231.135	C10H20N2O4||C10H20N2O4||C10H20N2O4||C10H20N2O4	[M-H]-||[M-H]-||[M-H]-||[M-H]-	HMDB0028917||HMDB0028939||HMDB0029064||HMDB0029065	Isoleucyl-Threonine||Leucyl-Threonine||Threoninyl-Isoleucine||Threoninyl-Leucine	0.98||0.98||0.98||0.98
233.078	C6H10N2O4||C6H10N2O4||C11H18OS	[M+Hac-H]-||[M+Hac-H]-||[M+Cl]-	HMDB0000854||HMDB0006028||HMDB0094658	Formiminoglutamic acid||N-Acetylasparagine||1-[2-Methyl-3-(methylthio) allyl]cyclohex-2-enol	0.95||0.95||3.84
236.078	C9H19NO2S2	[M-H]-	HMDB0013639	8-[(Aminomethyl)sulfanyl]-6-sulfanyloctanoic acid	-3.18
237	C8H10O4S||C8H10O4S	[M+Cl]-||[M+Cl]-	HMDB0062551||HMDB0062721	4-ethylphenylsulfate||3-ethylphenyl Sulfate	0.58||0.58
238.093	C6H13NO5||C6H13NO5||C9H13N5O3||C9H13N5O3	[M+Hac-H]-||[M+Hac-H]-||[M-H]-||[M-H]-	HMDB0001514||HMDB0002030||HMDB0000038||HMDB0002215	Glucosamine||Fructosamine||Dihydrobiopterin||4a-Carbinolamine tetrahydrobiopterin	0.78||0.78||-4.83||-4.83
239.078	C6H12O6||C6H12O6||C6H12O6||C6H12O6||C6H12O6||C6H12O6||C6H12O6||C6H12O6||C6H12O6||C6H12O6||C6H12O6||C6H12O6||C6H12O6||C6H12O6||C6H12O6||C6H12O6||C6H12O6||C7H8N4O2||C7H8N4O2	[M+Hac-H]-||[M+Hac-H]-||[M+Hac-H]-||[M+Hac-H]-||[M+Hac-H]-||[M+Hac-H]-||[M+Hac-H]-||[M+Hac-H]-||[M+Hac-H]-||[M+Hac-H]-||[M+Hac-H]-||[M+Hac-H]-||[M+Hac-H]-||[M+Hac-H]-||[M+Hac-H]-||[M+Hac-H]-||[M+Hac-H]-||[M+Hac-H]-||[M+Hac-H]-	HMDB0000122||HMDB0000143||HMDB0000169||HMDB0000211||HMDB0000516||HMDB0000660||HMDB0001151||HMDB0001266||HMDB0003345||HMDB0003418||HMDB0003449||HMDB0006088||HMDB0033704||HMDB0034220||HMDB0061922||HMDB0240209||HMDB0240211||HMDB0001860||HMDB0002825	D-Glucose||D-Galactose||D-Mannose||myo-Inositol||Beta-D-Glucose||D-Fructose||Allose||L-Sorbose||Alpha-D-Glucose||D-Tagatose||Beta-D-Galactose||scyllo-Inositol||L-Galactose||Levoinositol||Alpha-D-Glucopyranoside||D-chiro-inositol||allo-inositol||Paraxanthine||Theobromine	1.09||1.09||1.09||1.09||1.09||1.09||1.09||1.09||1.09||1.09||1.09||1.09||1.09||1.09||1.09||1.09||1.09||-4.51||-4.51
239.079	C7H8N4O2||C7H8N4O2	[M+Hac-H]-||[M+Hac-H]-	HMDB0001860||HMDB0002825	Paraxanthine||Theobromine	1.71||1.71
239.998	C9H7NO5S	[M-H]-	HMDB0060002	Indole-3-carboxilic acid-O-sulphate	1.26
241.012	C7H10O7||C7H10O7||C8H14O2S2	[M+Cl]-||[M+Cl]-||[M+Cl]-	HMDB0000379||HMDB0003518||HMDB0001451	2-Methylcitric acid||Homocitric acid||(R)-lipoic acid	0.35||0.35||-3.25
243.042	C11H12O4||C11H12O4	[M+Cl]-||[M+Cl]-	HMDB0029185||HMDB0034315	5-(3',4'-Dihydroxyphenyl)-gamma-valerolactone||3-(3,4-Dimethoxyphenyl)-2-propenoic acid	-2.46||-2.46
243.044	C11H12O4||C11H12O4	[M+Cl]-||[M+Cl]-	HMDB0029185||HMDB0034315	5-(3',4'-Dihydroxyphenyl)-gamma-valerolactone||3-(3,4-Dimethoxyphenyl)-2-propenoic acid	4.15||4.15
244.023	C3H8NO6P||C3H8NO6P	[M+Hac-H]-||[M+Hac-H]-	HMDB0000272||HMDB0001721	Phosphoserine||DL-O-Phosphoserine	1.46||1.46
245.043	C7H14O7||C6H15O8P||C8H10N4O3	[M+Cl]-||[M-H]-||[M+Cl]-	HMDB0003219||HMDB0240316||HMDB0002123	Sedoheptulose||Glycerophosphoglycerol||1,3,7-Trimethyluric acid	0.47||1.19||-4.99
245.045	C8H10N4O3	[M+Cl]-	HMDB0002123	1,3,7-Trimethyluric acid	1.68
245.094	C13H14N2O3	[M-H]-	HMDB0013713	N-acetyltryptophan	4.47
245.115	C10H18N2O5||C10H18N2O5||C10H18N2O5||C10H18N2O5||C10H18N2O5||C8H14N2O3||C8H14N2O3	[M-H]-||[M-H]-||[M-H]-||[M-H]-||[M-H]-||[M+Hac-H]-||[M+Hac-H]-	HMDB0011172||HMDB0028757||HMDB0028832||HMDB0028903||HMDB0029126||HMDB0028695||HMDB0029010	gamma-Glutamylvaline||Aspartyl-Leucine||Glutamylvaline||Isoleucyl-Aspartate||Valyl-Glutamate||Alanyl-Proline||Prolyl-Alanine	0.89||0.89||0.89||0.89||0.89||0.89||0.89
246.008	C8H9NO6S||C8H9NO6S	[M-H]-||[M-H]-	HMDB0062547||HMDB0240380	2-Hydroxyacetaminophen sulfate||HHPAA sulfate	0.81||0.81
246.017	C9H9NO5||C8H10NO6P	[M+Cl]-||[M-H]-	HMDB0059999||HMDB0001491	Gentisuric acid||Pyridoxal 5'-phosphate	-0.06||0.65
247.073	C11H16O4	[M+Cl]-	HMDB0059744	3,4-Methyleneazelaic acid	-3.31
247.094	C7H12N2O4||C9H16N2O6	[M+Hac-H]-||[M-H]-	HMDB0006029||HMDB0029159	N-Acetylglutamine||gamma-Glutamylthreonine	1.03||1.03
247.974	C4H8NO7P	[M+Cl]-	HMDB0012250	L-Aspartyl-4-phosphate	4.41
249.047	C9H14N2O2S	[M+Cl]-	HMDB0004822	Methyl bisnorbiotinyl ketone	0.83
249.055	C8H14N2O5S||C8H14N2O5S	[M-H]-||[M-H]-	HMDB0001049||HMDB0028816	gamma-Glutamylcysteine||Glutamylcysteine	0.65||0.65
251.042	C6H8O7||C6H8O7	[M+Hac-H]-||[M+Hac-H]-	HMDB0000094||HMDB0000193	Citric acid||Isocitric acid	3.07||3.07
256.06	C8H15NO6||C8H15NO6||C8H15NO6||C8H15NO6||C8H15NO6	[M+Cl]-||[M+Cl]-||[M+Cl]-||[M+Cl]-||[M+Cl]-	HMDB0000212||HMDB0000215||HMDB0000803||HMDB0000853||HMDB0001129	N-Acetylgalactosamine||N-Acetyl-D-glucosamine||beta-N-Acetylglucosamine||N-Acetyl-b-D-galactosamine||N-Acetylmannosamine	0.63||0.63||0.63||0.63||0.63
257.043	C8H14O7	[M+Cl]-	HMDB0010325	Ethyl glucuronide	-0.03
258.039	C4H10NO6P	[M+Hac-H]-	HMDB0011185	O-Phosphothreonine	0.85
258.182	C12H25N3O3||C12H25N3O3	[M-H]-||[M-H]-	HMDB0028954||HMDB0028955	Lysyl-Isoleucine||Lysyl-Leucine	0.54||0.54
259.023	C6H13O9P||C6H13O9P||C6H13O9P||C6H13O9P||C4H9O7P||C6H13O9P||C6H13O9P||C6H13O9P	[M-H]-||[M-H]-||[M-H]-||[M-H]-||[M+Hac-H]-||[M-H]-||[M-H]-||[M-H]-	HMDB0000124||HMDB0000213||HMDB0000645||HMDB0001078||HMDB0001321||HMDB0001401||HMDB0001586||HMDB0002985	Fructose 6-phosphate||Myo-inositol 1-phosphate||Galactose 1-phosphate||Mannose 6-phosphate||D-Erythrose 4-phosphate||Glucose 6-phosphate||Glucose 1-phosphate||Inositol phosphate	1.03||1.03||1.03||1.03||1.03||1.03||1.03||1.03
259.13	C11H20N2O5||C11H20N2O5||C11H20N2O5||C11H20N2O5||C11H20N2O5||C11H20N2O5	[M-H]-||[M-H]-||[M-H]-||[M-H]-||[M-H]-||[M-H]-	HMDB0011170||HMDB0011171||HMDB0028822||HMDB0028823||HMDB0028906||HMDB0028928	gamma-Glutamylisoleucine||gamma-Glutamylleucine||Glutamylisoleucine||Glutamylleucine||Isoleucyl-Glutamate||Leucyl-Glutamate	0.49||0.49||0.49||0.49||0.49||0.49
260.024	C9H11NO6S||C9H11NO6S	[M-H]-||[M-H]-	HMDB0062550||HMDB0155722	2-Methoxyacetaminophen sulfate||O-Sulfotyrosine	0.81||0.81
263.071	C9H16N2O5S	[M-H]-	HMDB0002381	N-Acetylcystathionine	0.51
263.104	C11H12N2O2||C13H16N2O4||C13H16N2O4||C11H12N2O2||C11H12N2O2||C13H16N2O4	[M+Hac-H]-||[M-H]-||[M-H]-||[M+Hac-H]-||[M+Hac-H]-||[M-H]-	HMDB0000929||HMDB0004259||HMDB0006344||HMDB0013609||HMDB0030396||HMDB0062645	L-Tryptophan||Acetyl-N-formyl-5-methoxykynurenamine||Phenylacetylglutamine||D-Tryptophan||(Â±)-Tryptophan||N(2)-phenylacetyl-L-glutaminate	0.55||0.55||0.55||0.55||0.55||0.55
265.12	C13H18N2O4||C13H18N2O4	[M-H]-||[M-H]-	HMDB0029005||HMDB0029068	Phenylalanyl-Threonine||Threoninyl-Phenylalanine	0.76||0.76
267.074	C10H12N4O5||C10H12N4O5||C10H12N4O5	[M-H]-||[M-H]-||[M-H]-	HMDB0000195||HMDB0000481||HMDB0003040	Inosine||Allopurinol riboside||Arabinosylhypoxanthine	0.7||0.7||0.7
267.076	C9H16N2O5||C9H16N2O5||C15H12N2O3	[M+Cl]-||[M+Cl]-||[M-H]-	HMDB0001199||HMDB0029123||HMDB0041905	N2-Succinyl-L-ornithine||Valyl-Aspartate||4-Hydroxyphenytoin	3.41||3.41||-4.8
269.088	C7H14O7||C8H10N4O3	[M+Hac-H]-||[M+Hac-H]-	HMDB0003219||HMDB0002123	Sedoheptulose||1,3,7-Trimethyluric acid	0.77||-4.2
272.054	C9H19NO2S2||C9H11N5O3||C9H11N5O3	[M+Cl]-||[M+Cl]-||[M+Cl]-	HMDB0013639||HMDB0000238||HMDB0000468	8-[(Aminomethyl)sulfanyl]-6-sulfanyloctanoic acid||Sepiapterin||Biopterin	-3.07||-4.79||-4.79
273.092	C9H14N2O2S	[M+Hac-H]-	HMDB0004822	Methyl bisnorbiotinyl ketone	3.23
273.186	C18H26O2	[M-H]-	HMDB0002725	Nandrolone	0.03
274.105	C10H17N3O6||C10H17N3O6	[M-H]-||[M-H]-	HMDB0011738||HMDB0029147	N2-gamma-Glutamylglutamine||N-gamma-Glutamylglutamine	0.73||0.73
274.141	C11H21N3O5||C11H21N3O5||C11H21N3O5	[M-H]-||[M-H]-||[M-H]-	HMDB0003869||HMDB0004207||HMDB0029154	Epsilon-(gamma-Glutamyl)-lysine||Glutamyllysine||gamma-Glutamyllysine	0.87||0.87||0.87
275.018	C6H13O10P	[M-H]-	HMDB0001316	6-Phosphogluconic acid	0.79
279.058	C10H16N2O3S	[M+Cl]-	HMDB0000030	Biotin	0.62
280.104	C8H15NO6||C8H15NO6||C8H15NO6||C8H15NO6||C8H15NO6||C11H15N5O4||C11H15N5O4	[M+Hac-H]-||[M+Hac-H]-||[M+Hac-H]-||[M+Hac-H]-||[M+Hac-H]-||[M-H]-||[M-H]-	HMDB0000212||HMDB0000215||HMDB0000803||HMDB0000853||HMDB0001129||HMDB0003331||HMDB0004044	N-Acetylgalactosamine||N-Acetyl-D-glucosamine||beta-N-Acetylglucosamine||N-Acetyl-b-D-galactosamine||N-Acetylmannosamine||1-Methyladenosine||N6-Methyladenosine	0.78||0.78||0.78||0.78||0.78||-4.0||-4.0
287.023	C11H12O7S	[M-H]-	HMDB0029191	5'-(3',4'-Dihydroxyphenyl)-gamma-valerolactone sulfate	0.53
289.033	C7H15O10P||C5H11O8P||C5H11O8P||C5H11O8P||C5H11O8P	[M-H]-||[M+Hac-H]-||[M+Hac-H]-||[M+Hac-H]-||[M+Hac-H]-	HMDB0001068||HMDB0000618||HMDB0000868||HMDB0001489||HMDB0001548	D-Sedoheptulose 7-phosphate||D-Ribulose 5-phosphate||Xylulose 5-phosphate||Ribose 1-phosphate||D-Ribose 5-phosphate	0.47||0.47||0.47||0.47||0.47
291.12	C9H16N2O5||C9H16N2O5	[M+Hac-H]-||[M+Hac-H]-	HMDB0001199||HMDB0029123	N2-Succinyl-L-ornithine||Valyl-Aspartate	2.25||2.25
292.072	C8H20NO6P	[M+Cl]-	HMDB0000086	Glycerophosphocholine	0.77
297.055	C12H14N2O5S	[M-H]-	HMDB0060834	N-Acetylserotonin sulfate	0.75
300.039	C8H15NO9S||C8H15NO9S	[M-H]-||[M-H]-	HMDB0000781||HMDB0000814	N-Acetylgalactosamine 4-sulphate||N-Acetylglucosamine 6-sulfate	-2.26||-2.26
300.049	C8H16NO9P||C8H16NO9P	[M-H]-||[M-H]-	HMDB0001062||HMDB0001367	N-Acetyl-D-Glucosamine 6-Phosphate||N-Acetyl-glucosamine 1-phosphate	0.62||0.62
300.082	C12H17N4OS	[M+Cl]-	HMDB0000235	Thiamine	-0.62
301.057	C12H14O9	[M-H]-	HMDB0060017	Pyrogallol-2-O-glucuronide	0.79
301.181	C19H26O3||C19H26O3||C19H26O3	[M-H]-||[M-H]-||[M-H]-	HMDB0000380||HMDB0000405||HMDB0003955	2-Hydroxyestradiol-3-methyl ether||2-Methoxyestradiol||19-Hydroxyandrost-4-ene-3,17-dione	0.7||0.7||0.7
303.051	C10H12N4O5||C10H12N4O5||C10H12N4O5	[M+Cl]-||[M+Cl]-||[M+Cl]-	HMDB0000195||HMDB0000481||HMDB0003040	Inosine||Allopurinol riboside||Arabinosylhypoxanthine	1.24||1.24||1.24
304.034	C9H12N3O7P	[M-H]-	HMDB0011691	Cytidine 2',3'-cyclic phosphate	-1.04
304.115	C9H15N3O5	[M+Hac-H]-	HMDB0028732	Asparaginyl-Hydroxyproline	0.38
306.077	C10H17N3O6S	[M-H]-	HMDB0000125	Glutathione	0.12
307.006	C11H12O6S	[M+Cl]-	HMDB0059993	5-(Hydroxyphenyl)-gamma-valerolactone-O-sulphate	2.55
307.074	C16H16O4	[M+Cl]-	HMDB0004810	5C-aglycone	-2.16
307.264	C20H36O2	[M-H]-	HMDB0005060	Eicosadienoic acid	0.32
308.077	C14H15NO7	[M-H]-	HMDB0010319	Indoxyl glucuronide	-3.13
308.099	C11H19NO9	[M-H]-	HMDB0000230	N-Acetylneuraminic acid	0.27
308.985	C10H10O7S	[M+Cl]-	HMDB0029200	Ferulic acid 4-sulfate	1.56
309.076	C8H14N2O5S||C8H14N2O5S	[M+Hac-H]-||[M+Hac-H]-	HMDB0001049||HMDB0028816	gamma-Glutamylcysteine||Glutamylcysteine	-1.44||-1.44
311.048	C10H16N2O5S	[M+Cl]-	HMDB0004818	Biotin sulfone	1.47
316.117	C8H20NO6P	[M+Hac-H]-	HMDB0000086	Glycerophosphocholine	0.2
317.056	C18H10N2O4	[M-H]-	HMDB0004068	Melanin	-2.55
322.045	C9H14N3O8P||C9H14N3O8P	[M-H]-||[M-H]-	HMDB0000095||HMDB0240312	Cytidine monophosphate||Cytidine 3'-monophosphate	0.5||0.5
323.001	C11H12O7S	[M+Cl]-	HMDB0029191	5'-(3',4'-Dihydroxyphenyl)-gamma-valerolactone sulfate	2.96
323.029	C10H12N2O8||C9H13N2O9P||C9H13N2O9P	[M+Cl]-||[M-H]-||[M-H]-	HMDB0000788||HMDB0000288||HMDB0060282	Orotidine||Uridine 5'-monophosphate||3'-UMP	0.01||0.55||0.55
327.233	C22H32O2	[M-H]-	HMDB0002183	Docosahexaenoic acid	0.29
329.249	C22H34O2||C22H34O2	[M-H]-||[M-H]-	HMDB0001976||HMDB0006528	Docosapentaenoic acid (22n-6)||Docosapentaenoic acid (22n-3)	-0.23||-0.23
330.062	C10H14N5O6P	[M-H]-	HMDB0000905	Deoxyadenosine monophosphate	4.66
330.179	C11H21N5O3	[M+Hac-H]-	HMDB0028717	Arginyl-Proline	2.76
331.05	C11H12O6S	[M+Hac-H]-	HMDB0059993	5-(Hydroxyphenyl)-gamma-valerolactone-O-sulphate	2.35
331.192	C18H24O2	[M+Hac-H]-	HMDB0000151	Estradiol	0.09
332.059	C11H15N5O3S	[M+Cl]-	HMDB0001173	5'-Methylthioadenosine	-0.1
332.195	C11H23N5O3||C11H23N5O3	[M+Hac-H]-||[M+Hac-H]-	HMDB0028722||HMDB0029121	Arginyl-Valine||Valyl-Arginine	2.96||2.96
333.031	C12H14N2O5S	[M+Cl]-	HMDB0060834	N-Acetylserotonin sulfate	-0.78
333.059	C9H19O11P	[M-H]-	HMDB0011649	1-(sn-Glycero-3-phospho)-1D-myo-inositol	0.32
334.126	C10H17N3O6||C10H17N3O6||C12H21N3O8	[M+Hac-H]-||[M+Hac-H]-||[M-H]-	HMDB0011738||HMDB0029147||HMDB0000489	N2-gamma-Glutamylglutamine||N-gamma-Glutamylglutamine||Aspartylglycosamine	-0.01||-0.01||-0.02
335.038	C6H13O10P	[M+Hac-H]-	HMDB0001316	6-Phosphogluconic acid	-2.47
337.016	C12H14O7S	[M+Cl]-	HMDB0060031	5-(3',5'-Dihydroxyphenyl)-gamma-valerolactone-O-sulphate-O-methyl	1.89
337.054	C9H15N4O8P	[M-H]-	HMDB0001517	AICAR	-4.72
338.989	C6H14O12P2||C6H14O12P2	[M-H]-||[M-H]-	HMDB0001058||HMDB0003514	Fructose 1,6-bisphosphate||Alpha-D-Glucose 1,6-bisphosphate	0.19||0.19
342.053	C10H17N3O6S	[M+Cl]-	HMDB0000125	Glutathione	-0.53
343.091	C10H12N4O6	[M+Hac-H]-	HMDB0000299	Xanthosine	4.41
343.191	C21H28O4	[M-H]-	HMDB0004029	11-Dehydrocorticosterone	-0.1
346.056	C10H14N5O7P||C10H14N5O7P	[M-H]-||[M-H]-	HMDB0000045||HMDB0003540	Adenosine monophosphate||3'-AMP	0.25||0.25
347.039	C10H13N4O8P	[M-H]-	HMDB0000175	Inosinic acid	-1.21
347.045	C11H12O7S	[M+Hac-H]-	HMDB0029191	5'-(3',4'-Dihydroxyphenyl)-gamma-valerolactone sulfate	2.04
356.103	C11H15N5O3S	[M+Hac-H]-	HMDB0001173	5'-Methylthioadenosine	0.09
357.025	C10H15N2O8P	[M+Cl]-	HMDB0001227	5-Thymidylic acid	-3.24
357.077	C12H14N2O5S	[M+Hac-H]-	HMDB0060834	N-Acetylserotonin sulfate	1.53
360.048	C14H15NO8	[M+Cl]-	HMDB0059997	Dihyroxy-1H-indole glucuronide I	-3.37
360.06	C8H15NO9S||C8H15NO9S	[M+Hac-H]-||[M+Hac-H]-	HMDB0000781||HMDB0000814	N-Acetylgalactosamine 4-sulphate||N-Acetylglucosamine 6-sulfate	-3.01||-3.01
361.061	C12H14O7S	[M+Hac-H]-	HMDB0060031	5-(3',5'-Dihydroxyphenyl)-gamma-valerolactone-O-sulphate-O-methyl	2.03
362.051	C10H14N5O8P	[M-H]-	HMDB0001397	Guanosine monophosphate	0.35
362.135	C15H17N3O4	[M+Hac-H]-	HMDB0013240	Indoleacetyl glutamine	-2.05
363.218	C19H28O3||C21H32O5||C19H28O3	[M+Hac-H]-||[M-H]-||[M+Hac-H]-	HMDB0000352||HMDB0000903||HMDB0006031	16a-Hydroxydehydroisoandrosterone||Tetrahydrocortisone||11-Ketoetiocholanolone	0.07||0.07||0.07
365.039	C9H11N2O8P	[M+Hac-H]-	HMDB0011640	Uridine 2',3'-cyclic phosphate	-1.58
366.039	C10H14N5O6P	[M+Cl]-	HMDB0000905	Deoxyadenosine monophosphate	4.33
367.018	C10H13N2O11P	[M-H]-	HMDB0000218	Orotidylic acid	-2.22
369.005	C12H14O9S	[M+Cl]-	HMDB0060029	5-(3',4',5'-Trihydroxyphenyl)-gamma-valerolactone-O-methyl-O-sulphate	0.25
371.02	C12H16O9S	[M+Cl]-	HMDB0059977	4-Hydroxy-5-(dihydroxyphenyl)-valeric acid-O-methyl-O-sulphate	-2.51
376.118	C17H19N5O3	[M+Cl]-	HMDB0028896	Histidinyl-Tryptophan	0.33
377.197	C21H30O6	[M-H]-	HMDB0000418	18-Hydroxycortisol	-0.07
378.058	C14H17NO9	[M+Cl]-	HMDB0240379	HHPAA glucuronide	-4.08
379.101	C12H24O11	[M+Cl]-	HMDB0002928	Maltitol	-1.17
382.1	C14H17N5O8	[M-H]-	HMDB0000912	Succinyladenosine	-1.67
383.114	C14H20N6O5S	[M-H]-	HMDB0000939	S-Adenosylhomocysteine	0.01
388.177	C19H23NO4	[M+Hac-H]-	HMDB0003601	(S)-Reticuline	1.64
389.009	C15H14O8S	[M+Cl]-	HMDB0059996	Dihydronaringenin-O-sulphate	-4.31
397.114	C18H22O10||C18H22O10||C18H22O10||C18H22O10	[M-H]-||[M-H]-||[M-H]-||[M-H]-	HMDB0029190||HMDB0059988||HMDB0059990||HMDB0060030	5-(3',4'-dihydroxyphenyl)-gamma-valerolactone-3'-O-glucuronide||5-(3',4'-Dihydroxyphenyl)-gamma-valerolactone-3'-O-methyl-4'-O-glucuronide||5-(3',4'-Dihydroxyphenyl)-gamma-valerolactone-4'-O-methyl-3'-O-glucuronide||5-(3',5'-Dihydroxyphenyl)-gamma-valerolactone-O-glucuronide-O-methyl	0.87||0.87||0.87||0.87
397.179	C21H30O5||C21H30O5	[M+Cl]-||[M+Cl]-	HMDB0000063||HMDB0000319	Cortisol||18-Hydroxycorticosterone	-0.46||-0.46
399.131	C16H20O8	[M+Hac-H]-	HMDB0060021	trans-isoeugenol-O-glucuronide	2.86
399.194	C21H32O5	[M+Cl]-	HMDB0000903	Tetrahydrocortisone	-0.42
401.21	C21H34O5||C21H34O5||C21H34O5	[M+Cl]-||[M+Cl]-||[M+Cl]-	HMDB0000526||HMDB0000949||HMDB0003128	5a-Tetrahydrocortisol||Tetrahydrocortisol||Cortolone	-1.14||-1.14||-1.14
402.01	C9H15N3O11P2	[M-H]-	HMDB0001546	CDP	-1.22
402.994	C9H14N2O12P2||C10H13N2O11P	[M-H]-||[M+Cl]-	HMDB0000295||HMDB0000218	Uridine 5'-diphosphate||Orotidylic acid	-1.44||-1.87
405.096	C17H22O9	[M+Cl]-	HMDB0059980	4-Hydroxy-5-(phenyl)-valeric acid-O-glucuronide	0.07
409.223	C20H30O5||C20H30O5||C20H30O5||C20H30O5	[M+Hac-H]-||[M+Hac-H]-||[M+Hac-H]-||[M+Hac-H]-	HMDB0002664||HMDB0003034||HMDB0003175||HMDB0010410	Prostaglandin E3||Prostaglandin D3||15-Keto-prostaglandin E2||Resolvin E1	-1.23||-1.23||-1.23||-1.23
418.112	C14H25NO11	[M+Cl]-	HMDB0006535	Beta-1,4-mannose-N-acetylglucosamine	-1.2
419.091	C14H20N6O5S	[M+Cl]-	HMDB0000939	S-Adenosylhomocysteine	-0.78
419.207	C21H28O5||C21H28O5	[M+Hac-H]-||[M+Hac-H]-	HMDB0000037||HMDB0002802	Aldosterone||Cortisone	-0.97||-0.97
421.223	C21H30O5||C21H30O5	[M+Hac-H]-||[M+Hac-H]-	HMDB0000063||HMDB0000319	Cortisol||18-Hydroxycorticosterone	-0.3||-0.3
423.239	C21H32O5	[M+Hac-H]-	HMDB0000903	Tetrahydrocortisone	-0.3
424.919	C5H13O14P3	[M+Cl]-	HMDB0000280	Phosphoribosyl pyrophosphate	-4.78
425.08	C13H22N4O8S2	[M-H]-	HMDB0000656	Cysteineglutathione disulfide	-1.89
426.022	C10H15N5O10P2||C10H15N5O10P2	[M-H]-||[M-H]-	HMDB0000061||HMDB0001341	Adenosine 3',5'-diphosphate||ADP	-0.57||-0.57
427.039	C10H13N2O11P	[M+Hac-H]-	HMDB0000218	Orotidylic acid	-2.29
430.984	C12H19Cl3O8	[M+Cl]-	HMDB0031554	Sucralose	-0.75
437.218	C21H30O6	[M+Hac-H]-	HMDB0000418	18-Hydroxycortisol	-0.95
437.267	C21H43O7P||C21H43O7P	[M-H]-||[M-H]-	HMDB0007850||HMDB0007854	LysoPA(0:0/18:0)||LysoPA(18:0/0:0)	-0.59||-0.59
442.017	C10H15N5O11P2	[M-H]-	HMDB0001201	Guanosine diphosphate	-0.3
443.174	C19H28O6S	[M+Hac-H]-	HMDB0062544	16a-hydroxy DHEA 3-sulfate	-0.48
445.053	C11H20N4O11P2	[M-H]-	HMDB0001564	CDP-Ethanolamine	0.59
448.307	C26H43NO5||C26H43NO5||C26H43NO5	[M-H]-||[M-H]-||[M-H]-	HMDB0000631||HMDB0000637||HMDB0000708	Deoxycholic acid glycine conjugate||Chenodeoxycholic acid glycine conjugate||Glycoursodeoxycholic acid	0.43||0.43||0.43
448.964	C5H13O14P3	[M+Hac-H]-	HMDB0000280	Phosphoribosyl pyrophosphate	-3.21
452.278	C21H44NO7P||C21H44NO7P	[M-H]-||[M-H]-	HMDB0011473||HMDB0011503	LysoPE(0:0/16:0)||LysoPE(16:0/0:0)	-0.31||-0.31
460.016	C12H19N4O7P2S	[M+Cl]-	HMDB0001372	Thiamine pyrophosphate	3.05
462.974	C18H15Cl3O8	[M-H]-	HMDB0061386	Triclosan glucuronide	-4.42
466.965	C9H15N2O14P3	[M-H]-	HMDB0001191	Deoxyuridine triphosphate	-3.24
478.294	C23H46NO7P||C23H46NO7P||C23H46NO7P||C23H46NO7P	[M-H]-||[M-H]-||[M-H]-||[M-H]-	HMDB0011475||HMDB0011476||HMDB0011505||HMDB0011506	LysoPE(0:0/18:1(11Z))||LysoPE(0:0/18:1(9Z))||LysoPE(18:1(11Z)/0:0)||LysoPE(18:1(9Z)/0:0)	-0.3||-0.3||-0.3||-0.3
481.242	C25H38O9	[M-H]-	HMDB0010351	11-beta-Hydroxyandrosterone-3-glucuronide	-4.63
482.961	C9H15N2O15P3	[M-H]-	HMDB0000285	Uridine triphosphate	-0.71
483.089	C18H24O13	[M+Cl]-	HMDB0059970	4-Hydroxy-5-(3',4',5'-trihydroxyphenyl)-valeric acid-O-methyl-O-glucuronide	-4.75
487.099	C14H26N4O11P2	[M-H]-	HMDB0001413	Citicoline	-1.18
489.992	C10H16N5O12P3	[M-H]-	HMDB0001532	Deoxyadenosine triphosphate	-3.37
498.289	C26H45NO6S||C26H45NO6S||C26H45NO6S	[M-H]-||[M-H]-||[M-H]-	HMDB0000874||HMDB0000896||HMDB0000951	Tauroursodeoxycholic acid||Taurodeoxycholic acid||Taurochenodesoxycholic acid	-0.02||-0.02||-0.02
505.989	C10H16N5O13P3	[M-H]-	HMDB0000538	Adenosine triphosphate	0.17
557.96	C10H16N5O14P3	[M+Cl]-	HMDB0001273	Guanosine triphosphate	0.66
565.048	C15H24N2O17P2||C15H24N2O17P2	[M-H]-||[M-H]-	HMDB0000286||HMDB0000302	Uridine diphosphate glucose||Uridine diphosphategalactose	0.23||0.23
572.482	C34H67NO3||C34H67NO3	[M+Cl]-||[M+Cl]-	HMDB0000790||HMDB0004949	N-Palmitoylsphingosine||Ceramide (d18:1/16:0)	0.05||0.05
579.027	C15H22N2O18P2	[M-H]-	HMDB0000935	Uridine diphosphate glucuronic acid	0.06
582.005	C10H16N5O14P3	[M+Hac-H]-	HMDB0001273	Guanosine triphosphate	0.31
599.32	C27H53O12P||C27H53O12P	[M-H]-||[M-H]-	HMDB0061696||HMDB0240261	1-Stearoylglycerophosphoinositol||LysoPI(18:0/0:0)	-0.33||-0.33
606.074	C17H27N3O17P2	[M-H]-	HMDB0000290	Uridine diphosphate-N-acetylglucosamine	-0.42
611.144	C20H32N6O12S2	[M-H]-	HMDB0003337	Oxidized glutathione	-0.76

## Sheet: S-3c-extractionpairs
Assay	Condition	measured m/z	molecular formula	adduct	HMDB ID	putative name	mass error (ppm)
Polar positive	Extraction pair I	89.1072	C4H12N2	[M+H]+	HMDB0001414	Putrescine	-0.99
Polar positive	Extraction pair I	144.048	C6H9NOS	[M+H]+	HMDB0032985	5-(2-Hydroxyethyl)-4-methylthiazole	0.72
Polar positive	Extraction pair I	161.092	C6H12N2O3||C6H12N2O3||C6H9NO3||C6H9NO3	[M+H]+||[M+H]+||[M+NH4]+||[M+NH4]+	HMDB0003459||HMDB0028680||HMDB0000894||HMDB0061705	D-Alanyl-D-alanine||Alanyl-Alanine||Vinylacetylglycine||6-Oxopiperidine-2-carboxylic acid	0.98||0.98||0.99||0.99
Polar positive	Extraction pair I	188.176	C9H21N3O||C9H21N3O	[M+H]+||[M+H]+	HMDB0001276||HMDB0002189	N1-Acetylspermidine||N8-Acetylspermidine	0.52||0.52
Polar positive	Extraction pair I	215.016	C6H8O7||C6H8O7	[M+Na]+||[M+Na]+	HMDB0000094||HMDB0000193	Citric acid||Isocitric acid	0.41||0.41
Polar positive	Extraction pair I	218.139	C10H19NO4||C10H16O4||C10H16O4	[M+H]+||[M+NH4]+||[M+NH4]+	HMDB0000824||HMDB0000603||HMDB0013227	Propionylcarnitine||cis-4-Decenedioic acid||cis-5-Decenedioic acid	0.1||0.11||0.11
Polar positive	Extraction pair I	231.17	C11H19NO3||C11H19NO3||C11H19NO3||C11H19NO3||C11H19NO3||C11H19NO3||C11H19NO3||C11H22N2O3||C11H22N2O3||C11H22N2O3||C11H22N2O3	[M+NH4]+||[M+NH4]+||[M+NH4]+||[M+NH4]+||[M+NH4]+||[M+NH4]+||[M+NH4]+||[M+H]+||[M+H]+||[M+H]+||[M+H]+	HMDB0094807||HMDB0094808||HMDB0094809||HMDB0094810||HMDB0094811||HMDB0094812||HMDB0094813||HMDB0028920||HMDB0028942||HMDB0029130||HMDB0029131	2-nonenoylglycine||3-nonenoylglycine||4-nonenoylglycine||5-nonenoylglycine||6-nonenoylglycine||7-nonenoylglycine||8-nonenoylglycine||Isoleucyl-Valine||Leucyl-Valine||Valyl-Isoleucine||Valyl-Leucine	-0.11||-0.11||-0.11||-0.11||-0.11||-0.11||-0.11||-0.12||-0.12||-0.12||-0.12
Polar positive	Extraction pair I	234.145	C9H16N2O4	[M+NH4]+	HMDB0240345	N2,N5-Diacetylornithine	0.44
Polar positive	Extraction pair I	245.186	C12H24N2O3||C12H24N2O3||C12H24N2O3||C12H24N2O3	[M+H]+||[M+H]+||[M+H]+||[M+H]+	HMDB0028910||HMDB0028911||HMDB0028932||HMDB0028933	Isoleucyl-Isoleucine||Isoleucyl-Leucine||Leucyl-Isoleucine||Leucyl-Leucine	-0.11||-0.11||-0.11||-0.11
Polar positive	Extraction pair I	260.16	C11H21N3O4||C11H21N3O4||C11H21N3O4	[M+H]+||[M+H]+||[M+H]+	HMDB0028800||HMDB0028801||HMDB0028927	Glutaminylisoleucine||Glutaminylleucine||Leucyl-Glutamine	-0.44||-0.44||-0.44
Polar positive	Extraction pair I	261.145	C11H20N2O5||C11H20N2O5||C11H20N2O5||C11H20N2O5||C11H20N2O5||C11H20N2O5	[M+H]+||[M+H]+||[M+H]+||[M+H]+||[M+H]+||[M+H]+	HMDB0011170||HMDB0011171||HMDB0028822||HMDB0028823||HMDB0028906||HMDB0028928	gamma-Glutamylisoleucine||gamma-Glutamylleucine||Glutamylisoleucine||Glutamylleucine||Isoleucyl-Glutamate||Leucyl-Glutamate	0.31||0.31||0.31||0.31||0.31||0.31
Polar positive	Extraction pair I	267.134	C13H18N2O4||C13H18N2O4	[M+H]+||[M+H]+	HMDB0029005||HMDB0029068	Phenylalanyl-Threonine||Threoninyl-Phenylalanine	0.3||0.3
Polar positive	Extraction pair I	269.111	C10H18N2O5||C10H18N2O5||C10H18N2O5||C10H18N2O5||C10H18N2O5	[M+Na]+||[M+Na]+||[M+Na]+||[M+Na]+||[M+Na]+	HMDB0011172||HMDB0028757||HMDB0028832||HMDB0028903||HMDB0029126	gamma-Glutamylvaline||Aspartyl-Leucine||Glutamylvaline||Isoleucyl-Aspartate||Valyl-Glutamate	-0.14||-0.14||-0.14||-0.14||-0.14
Polar positive	Extraction pair I	269.161	C12H20N4O3||C12H20N4O3	[M+H]+||[M+H]+	HMDB0028888||HMDB0028889	Histidinyl-Isoleucine||Histidinyl-Leucine	-0.09||-0.09
Polar positive	Extraction pair I	279.17	C15H22N2O3||C15H22N2O3||C15H22N2O3	[M+H]+||[M+H]+||[M+H]+	HMDB0013243||HMDB0028914||HMDB0028998	Leucyl-phenylalanine||Isoleucyl-Phenylalanine||Phenylalanyl-Isoleucine	-0.38||-0.38||-0.38
Polar positive	Extraction pair I	320.079	C11H15N5O3S||C12H14O7S	[M+Na]+||[M+NH4]+	HMDB0001173||HMDB0060031	5'-Methylthioadenosine||5-(3',5'-Dihydroxyphenyl)-gamma-valerolactone-O-sulphate-O-methyl	-0.12||-3.45
Polar positive	Extraction pair I	325.005	C9H10INO3	[M+NH4]+	HMDB0000021	Iodotyrosine	2.69
Polar positive	Extraction pair I	339.229	C21H32O2||C21H32O2||C21H32O2||C21H32O2	[M+Na]+||[M+Na]+||[M+Na]+||[M+Na]+	HMDB0000253||HMDB0003069||HMDB0003759||HMDB0034369	Pregnenolone||20a-Dihydroprogesterone||5a-Pregnane-3,20-dione||(3beta,5alpha)-3-Hydroxypregn-16-en-20-one	-0.01||-0.01||-0.01||-0.01
Polar positive	Extraction pair I	370.052	C10H14N5O7P||C10H14N5O7P	[M+Na]+||[M+Na]+	HMDB0000045||HMDB0003540	Adenosine monophosphate||3'-AMP	-0.33||-0.33
Polar positive	Extraction pair I	381.131	C20H22O6	[M+Na]+	HMDB0035789	Matairesinol	-0.06
Polar positive	Extraction pair I	384.114	C14H17N5O8	[M+H]+	HMDB0000912	Succinyladenosine	-2.25
Polar positive	Extraction pair I	386.047	C10H14N5O8P	[M+Na]+	HMDB0001397	Guanosine monophosphate	-0.3
Polar positive	Extraction pair I	435.251	C21H39O7P	[M+H]+	HMDB0007856	LysoPA(18:2(9Z,12Z)/0:0)	0.28
Polar positive	Extraction pair I	449.127	C18H24O13	[M+H]+	HMDB0059970	4-Hydroxy-5-(3',4',5'-trihydroxyphenyl)-valeric acid-O-methyl-O-glucuronide	-3.55
Polar positive	Extraction pair I	453.163	C19H32O8S2||C19H32O8S2	[M+H]+||[M+H]+	HMDB0094682||HMDB0240625	5alpha-Androstan-3alpha,17beta-diol disulfate||5alpha-Androstan-3beta,17alpha-diol disulfate	3.57||3.57
Polar positive	Extraction pair I	464.13	C19H19N7O6	[M+Na]+	HMDB0000121	Folic acid	1.5
Polar positive	Extraction pair I	476.275	C21H44NO7P||C21H44NO7P||C23H42NO7P	[M+Na]+||[M+Na]+||[M+H]+	HMDB0011473||HMDB0011503||HMDB0011478	LysoPE(0:0/16:0)||LysoPE(16:0/0:0)||LysoPE(0:0/18:3(6Z,9Z,12Z))	0.62||0.62||-4.43
Polar positive	Extraction pair I	511.097	C14H26N4O11P2	[M+Na]+	HMDB0001413	Citicoline	0.51
Polar positive	Extraction pair I	544.338	C26H52NO7P||C26H52NO7P||C26H52NO7P||C26H52NO7P||C28H50NO7P||C28H50NO7P	[M+Na]+||[M+Na]+||[M+Na]+||[M+Na]+||[M+H]+||[M+H]+	HMDB0002815||HMDB0010385||HMDB0061701||HMDB0062651||HMDB0010395||HMDB0010396	LysoPC(18:1(9Z))||LysoPC(18:1(11Z))||2-Oleoylglycerophosphocholine||2-oleoyl-sn-glycero-3-phosphocholine||LysoPC(20:4(5Z,8Z,11Z,14Z))||LysoPC(20:4(8Z,11Z,14Z,17Z))	0.27||0.27||0.27||0.27||-4.15||-4.15
Polar positive	Extraction pair I	585.25	C34H34N4O4	[M+Na]+	HMDB0000241	Protoporphyrin IX	4.83
Polar positive	Extraction pair II	122.027	C3H7NO2S||C3H7NO2S	[M+H]+||[M+H]+	HMDB0000574||HMDB0003417	L-Cysteine||D-Cysteine	0.43||0.43
Polar positive	Extraction pair II	132.077	C4H6N2O2||C4H6N2O2||C4H9N3O2||C4H9N3O2	[M+NH4]+||[M+NH4]+||[M+H]+||[M+H]+	HMDB0000076||HMDB0003646||HMDB0000064||HMDB0013222	Dihydrouracil||N-Methylhydantoin||Creatine||Beta-Guanidinopropionic acid	-0.16||-0.16||-0.19||-0.19
Polar positive	Extraction pair II	137.071	C7H8N2O	[M+H]+	HMDB0003152	N-Methylnicotinamide	0.56
Polar positive	Extraction pair II	144.048	C6H9NOS	[M+H]+	HMDB0032985	5-(2-Hydroxyethyl)-4-methylthiazole	0.72
Polar positive	Extraction pair II	145.026	C7H6O2||C7H6O2||C7H6O2	[M+Na]+||[M+Na]+||[M+Na]+	HMDB0001870||HMDB0011718||HMDB0034170	Benzoic acid||4-Hydroxybenzaldehyde||2-Hydroxybenzaldehyde	1.88||1.88||1.88
Polar positive	Extraction pair II	146.092	C5H8N2O2||C5H8N2O2||C5H11N3O2	[M+NH4]+||[M+NH4]+||[M+H]+	HMDB0000079||HMDB0062558||HMDB0003464	Dihydrothymine||Pyroglutamine||4-Guanidinobutanoic acid	-3.42||-3.42||-3.43
Polar positive	Extraction pair II	151.048	C5H8N2O2||C5H8N2O2	[M+Na]+||[M+Na]+	HMDB0000079||HMDB0062558	Dihydrothymine||Pyroglutamine	0.56||0.56
Polar positive	Extraction pair II	169.058	C5H10N2O3||C5H10N2O3||C5H10N2O3||C5H10N2O3	[M+Na]+||[M+Na]+||[M+Na]+||[M+Na]+	HMDB0000641||HMDB0002031||HMDB0003423||HMDB0006899	L-Glutamine||Ureidoisobutyric acid||D-Glutamine||Alanylglycine	0.68||0.68||0.68||0.68
Polar positive	Extraction pair II	190.083	C9H13NO2||C9H13NO2||C9H13NO2	[M+Na]+||[M+Na]+||[M+Na]+	HMDB0000022||HMDB0004826||HMDB0012162	3-Methoxytyramine||p-Synephrine||4-Methoxytyramine	-2.78||-2.78||-2.78
Polar positive	Extraction pair II	214.084	C11H13NO2	[M+Na]+	HMDB0001896	5-Methoxytryptophol	1.09
Polar positive	Extraction pair II	215.016	C6H8O7||C6H8O7	[M+Na]+||[M+Na]+	HMDB0000094||HMDB0000193	Citric acid||Isocitric acid	0.41||0.41
Polar positive	Extraction pair II	215.084	C9H14N2O2S	[M+H]+	HMDB0004822	Methyl bisnorbiotinyl ketone	-4.26
Polar positive	Extraction pair II	218.139	C10H19NO4||C10H16O4||C10H16O4	[M+H]+||[M+NH4]+||[M+NH4]+	HMDB0000824||HMDB0000603||HMDB0013227	Propionylcarnitine||cis-4-Decenedioic acid||cis-5-Decenedioic acid	0.1||0.11||0.11
Polar positive	Extraction pair II	245.057	C7H14N2O4S	[M+Na]+	HMDB0000099	L-Cystathionine	-0.3
Polar positive	Extraction pair II	256.025	C8H11NO5S||C8H11NO5S	[M+Na]+||[M+Na]+	HMDB0004148||HMDB0006275	Dopamine 4-sulfate||Dopamine 3-O-sulfate	0.63||0.63
Polar positive	Extraction pair II	273.051	C8H14N2O5S||C8H14N2O5S	[M+Na]+||[M+Na]+	HMDB0001049||HMDB0028816	gamma-Glutamylcysteine||Glutamylcysteine	-0.36||-0.36
Polar positive	Extraction pair II	277.038	C10H12O7S	[M+H]+	HMDB0041724	Dihydroferulic acid 4-sulfate	1.86
Polar positive	Extraction pair II	283.019	C6H13O9P||C6H13O9P||C6H13O9P||C6H13O9P||C6H13O9P||C6H13O9P||C6H13O9P	[M+Na]+||[M+Na]+||[M+Na]+||[M+Na]+||[M+Na]+||[M+Na]+||[M+Na]+	HMDB0000124||HMDB0000213||HMDB0000645||HMDB0001078||HMDB0001401||HMDB0001586||HMDB0002985	Fructose 6-phosphate||Myo-inositol 1-phosphate||Galactose 1-phosphate||Mannose 6-phosphate||Glucose 6-phosphate||Glucose 1-phosphate||Inositol phosphate	-0.31||-0.31||-0.31||-0.31||-0.31||-0.31||-0.31
Polar positive	Extraction pair II	290.16	C13H23NO6||C13H23NO6	[M+H]+||[M+H]+	HMDB0000552||HMDB0061677	3-Methylglutarylcarnitine||O-Adipoylcarnitine	-0.01||-0.01
Polar positive	Extraction pair II	291.054	C11H14O7S||C11H14O7S	[M+H]+||[M+H]+	HMDB0059975||HMDB0059976	4-Hydroxy-5-(3'-hydroxyphenyl)-valeric acid-3'-O-sulphate||4-Hydroxy-5-(4'-hydroxyphenyl)-valeric acid-4'-O-sulphate	2.16||2.16
Polar positive	Extraction pair II	302.233	C16H31NO4||C16H31NO4	[M+H]+||[M+H]+	HMDB0006320||HMDB0013288	2,6 Dimethylheptanoyl carnitine||Nonanoylcarnitine	-0.22||-0.22
Polar positive	Extraction pair II	316.248	C17H33NO4	[M+H]+	HMDB0000651	Decanoylcarnitine	-0.2
Polar positive	Extraction pair II	330.073	C10H17N3O6S	[M+Na]+	HMDB0000125	Glutathione	-0.71
Polar positive	Extraction pair II	339.229	C21H32O2||C21H32O2||C21H32O2||C21H32O2	[M+Na]+||[M+Na]+||[M+Na]+||[M+Na]+	HMDB0000253||HMDB0003069||HMDB0003759||HMDB0034369	Pregnenolone||20a-Dihydroprogesterone||5a-Pregnane-3,20-dione||(3beta,5alpha)-3-Hydroxypregn-16-en-20-one	-0.01||-0.01||-0.01||-0.01
Polar positive	Extraction pair II	342.07	C9H13N2O9P||C9H13N2O9P	[M+NH4]+||[M+NH4]+	HMDB0000288||HMDB0060282	Uridine 5'-monophosphate||3'-UMP	0.07||0.07
Polar positive	Extraction pair II	344.28	C19H37NO4	[M+H]+	HMDB0002250	Dodecanoylcarnitine	0.01
Polar positive	Extraction pair II	346.041	C9H14N3O8P||C9H14N3O8P	[M+Na]+||[M+Na]+	HMDB0000095||HMDB0240312	Cytidine monophosphate||Cytidine 3'-monophosphate	0.55||0.55
Polar positive	Extraction pair II	358.091	C11H20N2O4S3	[M+NH4]+	HMDB0061113	Sulforaphane-N-acetylcysteine	-3.27
Polar positive	Extraction pair II	369.032	C10H13N2O11P	[M+H]+	HMDB0000218	Orotidylic acid	-2.38
Polar positive	Extraction pair II	372.311	C21H38O4||C21H38O4||C21H41NO4	[M+NH4]+||[M+NH4]+||[M+H]+	HMDB0011538||HMDB0011568||HMDB0005066	MG(0:0/18:2(9Z,12Z)/0:0)||MG(18:2(9Z,12Z)/0:0/0:0)||Tetradecanoylcarnitine	-0.43||-0.43||-0.44
Polar positive	Extraction pair II	381.131	C20H22O6	[M+Na]+	HMDB0035789	Matairesinol	-0.06
Polar positive	Extraction pair II	391.014	C10H13N2O11P	[M+Na]+	HMDB0000218	Orotidylic acid	-2.11
Polar positive	Extraction pair II	398.327	C23H43NO4||C23H43NO4||C23H40O4||C23H40O4||C23H40O4||C23H40O4	[M+H]+||[M+H]+||[M+NH4]+||[M+NH4]+||[M+NH4]+||[M+NH4]+	HMDB0006317||HMDB0013207||HMDB0011546||HMDB0011547||HMDB0011576||HMDB0011577	trans-Hexadec-2-enoyl carnitine||9-Hexadecenoylcarnitine||MG(0:0/20:3(5Z,8Z,11Z)/0:0)||MG(0:0/20:3(8Z,11Z,14Z)/0:0)||MG(20:3(5Z,8Z,11Z)/0:0/0:0)||MG(20:3(8Z,11Z,14Z)/0:0/0:0)	0.17||0.17||0.17||0.17||0.17||0.17
Polar positive	Extraction pair II	400.342	C23H42O4||C23H42O4||C23H45NO4	[M+NH4]+||[M+NH4]+||[M+H]+	HMDB0011544||HMDB0011574||HMDB0000222	MG(0:0/20:2(11Z,14Z)/0:0)||MG(20:2(11Z,14Z)/0:0/0:0)||L-Palmitoylcarnitine	-0.14||-0.14||-0.14
Polar positive	Extraction pair II	423.323	C27H44O2||C27H44O2||C27H44O2	[M+Na]+||[M+Na]+||[M+Na]+	HMDB0000501||HMDB0001993||HMDB0003550	7-Ketocholesterol||7a-Hydroxy-cholestene-3-one||Calcidiol	-0.08||-0.08||-0.08
Polar positive	Extraction pair II	426.358	C25H47NO4||C25H47NO4||C25H47NO4||C25H47NO4||C25H47NO4	[M+H]+||[M+H]+||[M+H]+||[M+H]+||[M+H]+	HMDB0005065||HMDB0006464||HMDB0013337||HMDB0013338||HMDB0094687	Oleoylcarnitine||Elaidic carnitine||2-Hydroxyhexadecanoylcarnitine||11Z-Octadecenylcarnitine||Octadecenoylcarnitine	-0.07||-0.07||-0.07||-0.07||-0.07
Polar positive	Extraction pair II	435.251	C21H39O7P	[M+H]+	HMDB0007856	LysoPA(18:2(9Z,12Z)/0:0)	0.28
Polar positive	Extraction pair II	449.077	C13H22N4O8S2	[M+Na]+	HMDB0000656	Cysteineglutathione disulfide	0.71
Polar positive	Extraction pair II	453.163	C19H32O8S2||C19H32O8S2	[M+H]+||[M+H]+	HMDB0094682||HMDB0240625	5alpha-Androstan-3alpha,17beta-diol disulfate||5alpha-Androstan-3beta,17alpha-diol disulfate	3.57||3.57
Polar positive	Extraction pair II	489.182	C18H32O15||C18H32O15	[M+H]+||[M+H]+	HMDB0002094||HMDB0002098	3-Fucosyllactose||2-Fucosyllactose	2.08||2.08
Polar positive	Extraction pair II	542.491	C36H60O2	[M+NH4]+	HMDB0003648	Retinyl palmitate	-4.32
Polar positive	Extraction pair II	562.196	C24H32O12S	[M+NH4]+	HMDB0010356	Estriol 3-sulfate 16-glucuronide	0.81
Polar positive	Extraction pair II	585.25	C34H34N4O4	[M+Na]+	HMDB0000241	Protoporphyrin IX	4.83
Polar negative	Extraction pair I	120.013	C3H7NO2S||C3H7NO2S	[M-H]-||[M-H]-	HMDB0000574||HMDB0003417	L-Cysteine||D-Cysteine	0.75||0.75
Polar negative	Extraction pair I	128.018	C5H7NOS	[M-H]-	HMDB0033561	2-Acetyl-4,5-dihydrothiazole	0.84
Polar negative	Extraction pair I	130.062	C4H9N3O2||C4H9N3O2	[M-H]-||[M-H]-	HMDB0000064||HMDB0013222	Creatine||Beta-Guanidinopropionic acid	0.95||0.95
Polar negative	Extraction pair I	152.002	C3H7NO4S||C3H7NO4S	[M-H]-||[M-H]-	HMDB0000996||HMDB0060179	3-Sulfinoalanine||3-Sulfinato-L-alaninate	0.73||0.73
Polar negative	Extraction pair I	155.046	C6H8N2O3	[M-H]-	HMDB0002320	Imidazolelactic acid	0.67
Polar negative	Extraction pair I	166.018	C4H9NO4S	[M-H]-	HMDB0240253	N-Acetyltaurine	0.76
Polar negative	Extraction pair I	171.006	CH5O4P||C3H9O6P||C3H9O6P	[M+Hac-H]-||[M-H]-||[M-H]-	HMDB0061711||HMDB0000126||HMDB0002520	Methylphosphate||Glycerol 3-phosphate||Beta-Glycerophosphoric acid	-4.14||-4.14||-4.14
Polar negative	Extraction pair I	171.007	C4H8O5||C4H8O5||C4H8O5||C3H9O6P||C3H9O6P||CH5O4P	[M+Cl]-||[M+Cl]-||[M+Cl]-||[M-H]-||[M-H]-||[M+Hac-H]-	HMDB0000613||HMDB0000943||HMDB0062620||HMDB0000126||HMDB0002520||HMDB0061711	Erythronic acid||Threonic acid||L-threonic Acid||Glycerol 3-phosphate||Beta-Glycerophosphoric acid||Methylphosphate	1.53||1.53||1.53||2.55||2.55||2.55
Polar negative	Extraction pair I	171.008	C5H4N4O	[M+Cl]-	HMDB0000157	Hypoxanthine	-1.33
Polar negative	Extraction pair I	171.078	C7H12N2O3||C7H12N2O3	[M-H]-||[M-H]-	HMDB0000721||HMDB0011178	Glycylproline||Prolylglycine	2.47||2.47
Polar negative	Extraction pair I	173.01	C6H6O6||C6H6O6||C6H6O6	[M-H]-||[M-H]-||[M-H]-	HMDB0000072||HMDB0000958||HMDB0001264	cis-Aconitic acid||trans-Aconitic acid||Dehydroascorbic acid	2.48||2.48||2.48
Polar negative	Extraction pair I	175.073	C6H12N2O4	[M-H]-	HMDB0028851	Glycyl-Threonine	2.33
Polar negative	Extraction pair I	185.057	C7H10N2O4||C5H6N2O2||C5H6N2O2	[M-H]-||[M+Hac-H]-||[M+Hac-H]-	HMDB0061890||HMDB0000262||HMDB0002024	Pyroglutamylglycine||Thymine||Imidazoleacetic acid	0.98||0.99||0.99
Polar negative	Extraction pair I	190.054	C7H13NO3S	[M-H]-	HMDB0011745	N-Acetyl-L-methionine	0.83
Polar negative	Extraction pair I	201.125	C9H18N2O3||C9H18N2O3||C9H18N2O3||C9H18N2O3	[M-H]-||[M-H]-||[M-H]-||[M-H]-	HMDB0028690||HMDB0028691||HMDB0028900||HMDB0028922	Alanyl-Isoleucine||Alanyl-Leucine||Isoleucyl-Alanine||Leucyl-Alanine	0.89||0.89||0.89||0.89
Polar negative	Extraction pair I	203.068	C7H12N2O5	[M-H]-	HMDB0011667	gamma-Glutamylglycine	0.81
Polar negative	Extraction pair I	207.078	C10H12N2O3||C10H12N2O3	[M-H]-||[M-H]-	HMDB0000684||HMDB0012948	L-Kynurenine||Formyl-5-hydroxykynurenamine	1.04||1.04
Polar negative	Extraction pair I	210.029	C5H9N3O4||C4H10N3O5P	[M+Cl]-||[M-H]-	HMDB0003157||HMDB0001511	Guanidinosuccinic acid||Phosphocreatine	0.1||0.93
Polar negative	Extraction pair I	211.001	C6H8O6||C6H8O6	[M+Cl]-||[M+Cl]-	HMDB0000044||HMDB0031193	Ascorbic acid||1,2,3-Propanetricarboxylic acid	0.02||0.02
Polar negative	Extraction pair I	213.069	C11H14O2	[M+Cl]-	HMDB0002043	5-Phenylvaleric acid	0.06
Polar negative	Extraction pair I	217.083	C8H14N2O5||C8H14N2O5||C8H14N2O5	[M-H]-||[M-H]-||[M-H]-	HMDB0006248||HMDB0028686||HMDB0036301	gamma-Glutamylalanine||Alanyl-Glutamic acid||N-gamma-L-Glutamyl-D-alanine	0.54||0.54||0.54
Polar negative	Extraction pair I	229.049	C7H14O6||C7H14O6	[M+Cl]-||[M+Cl]-	HMDB0029965||HMDB0034219	Methyl beta-D-glucopyranoside||D-Pinitol	0.74||0.74
Polar negative	Extraction pair I	229.156	C11H22N2O3||C11H22N2O3||C11H22N2O3||C11H22N2O3	[M-H]-||[M-H]-||[M-H]-||[M-H]-	HMDB0028920||HMDB0028942||HMDB0029130||HMDB0029131	Isoleucyl-Valine||Leucyl-Valine||Valyl-Isoleucine||Valyl-Leucine	0.82||0.82||0.82||0.82
Polar negative	Extraction pair I	233.078	C6H10N2O4||C6H10N2O4||C11H18OS	[M+Hac-H]-||[M+Hac-H]-||[M+Cl]-	HMDB0000854||HMDB0006028||HMDB0094658	Formiminoglutamic acid||N-Acetylasparagine||1-[2-Methyl-3-(methylthio) allyl]cyclohex-2-enol	0.95||0.95||3.84
Polar negative	Extraction pair I	245.115	C10H18N2O5||C10H18N2O5||C10H18N2O5||C10H18N2O5||C10H18N2O5||C8H14N2O3||C8H14N2O3	[M-H]-||[M-H]-||[M-H]-||[M-H]-||[M-H]-||[M+Hac-H]-||[M+Hac-H]-	HMDB0011172||HMDB0028757||HMDB0028832||HMDB0028903||HMDB0029126||HMDB0028695||HMDB0029010	gamma-Glutamylvaline||Aspartyl-Leucine||Glutamylvaline||Isoleucyl-Aspartate||Valyl-Glutamate||Alanyl-Proline||Prolyl-Alanine	0.89||0.89||0.89||0.89||0.89||0.89||0.89
Polar negative	Extraction pair I	246.008	C8H9NO6S||C8H9NO6S	[M-H]-||[M-H]-	HMDB0062547||HMDB0240380	2-Hydroxyacetaminophen sulfate||HHPAA sulfate	0.81||0.81
Polar negative	Extraction pair I	247.094	C7H12N2O4||C9H16N2O6	[M+Hac-H]-||[M-H]-	HMDB0006029||HMDB0029159	N-Acetylglutamine||gamma-Glutamylthreonine	1.03||1.03
Polar negative	Extraction pair I	256.06	C8H15NO6||C8H15NO6||C8H15NO6||C8H15NO6||C8H15NO6	[M+Cl]-||[M+Cl]-||[M+Cl]-||[M+Cl]-||[M+Cl]-	HMDB0000212||HMDB0000215||HMDB0000803||HMDB0000853||HMDB0001129	N-Acetylgalactosamine||N-Acetyl-D-glucosamine||beta-N-Acetylglucosamine||N-Acetyl-b-D-galactosamine||N-Acetylmannosamine	0.63||0.63||0.63||0.63||0.63
Polar negative	Extraction pair I	258.182	C12H25N3O3||C12H25N3O3	[M-H]-||[M-H]-	HMDB0028954||HMDB0028955	Lysyl-Isoleucine||Lysyl-Leucine	0.54||0.54
Polar negative	Extraction pair I	259.13	C11H20N2O5||C11H20N2O5||C11H20N2O5||C11H20N2O5||C11H20N2O5||C11H20N2O5	[M-H]-||[M-H]-||[M-H]-||[M-H]-||[M-H]-||[M-H]-	HMDB0011170||HMDB0011171||HMDB0028822||HMDB0028823||HMDB0028906||HMDB0028928	gamma-Glutamylisoleucine||gamma-Glutamylleucine||Glutamylisoleucine||Glutamylleucine||Isoleucyl-Glutamate||Leucyl-Glutamate	0.49||0.49||0.49||0.49||0.49||0.49
Polar negative	Extraction pair I	260.024	C9H11NO6S||C9H11NO6S	[M-H]-||[M-H]-	HMDB0062550||HMDB0155722	2-Methoxyacetaminophen sulfate||O-Sulfotyrosine	0.81||0.81
Polar negative	Extraction pair I	265.12	C13H18N2O4||C13H18N2O4	[M-H]-||[M-H]-	HMDB0029005||HMDB0029068	Phenylalanyl-Threonine||Threoninyl-Phenylalanine	0.76||0.76
Polar negative	Extraction pair I	267.074	C10H12N4O5||C10H12N4O5||C10H12N4O5	[M-H]-||[M-H]-||[M-H]-	HMDB0000195||HMDB0000481||HMDB0003040	Inosine||Allopurinol riboside||Arabinosylhypoxanthine	0.7||0.7||0.7
Polar negative	Extraction pair I	274.105	C10H17N3O6||C10H17N3O6	[M-H]-||[M-H]-	HMDB0011738||HMDB0029147	N2-gamma-Glutamylglutamine||N-gamma-Glutamylglutamine	0.73||0.73
Polar negative	Extraction pair I	303.051	C10H12N4O5||C10H12N4O5||C10H12N4O5	[M+Cl]-||[M+Cl]-||[M+Cl]-	HMDB0000195||HMDB0000481||HMDB0003040	Inosine||Allopurinol riboside||Arabinosylhypoxanthine	1.24||1.24||1.24
Polar negative	Extraction pair I	308.985	C10H10O7S	[M+Cl]-	HMDB0029200	Ferulic acid 4-sulfate	1.56
Polar negative	Extraction pair I	322.045	C9H14N3O8P||C9H14N3O8P	[M-H]-||[M-H]-	HMDB0000095||HMDB0240312	Cytidine monophosphate||Cytidine 3'-monophosphate	0.5||0.5
Polar negative	Extraction pair I	323.029	C10H12N2O8||C9H13N2O9P||C9H13N2O9P	[M+Cl]-||[M-H]-||[M-H]-	HMDB0000788||HMDB0000288||HMDB0060282	Orotidine||Uridine 5'-monophosphate||3'-UMP	0.01||0.55||0.55
Polar negative	Extraction pair I	327.233	C22H32O2	[M-H]-	HMDB0002183	Docosahexaenoic acid	0.29
Polar negative	Extraction pair I	329.249	C22H34O2||C22H34O2	[M-H]-||[M-H]-	HMDB0001976||HMDB0006528	Docosapentaenoic acid (22n-6)||Docosapentaenoic acid (22n-3)	-0.23||-0.23
Polar negative	Extraction pair I	332.059	C11H15N5O3S	[M+Cl]-	HMDB0001173	5'-Methylthioadenosine	-0.1
Polar negative	Extraction pair I	338.989	C6H14O12P2||C6H14O12P2	[M-H]-||[M-H]-	HMDB0001058||HMDB0003514	Fructose 1,6-bisphosphate||Alpha-D-Glucose 1,6-bisphosphate	0.19||0.19
Polar negative	Extraction pair I	346.056	C10H14N5O7P||C10H14N5O7P	[M-H]-||[M-H]-	HMDB0000045||HMDB0003540	Adenosine monophosphate||3'-AMP	0.25||0.25
Polar negative	Extraction pair I	356.103	C11H15N5O3S	[M+Hac-H]-	HMDB0001173	5'-Methylthioadenosine	0.09
Polar negative	Extraction pair I	357.025	C10H15N2O8P	[M+Cl]-	HMDB0001227	5-Thymidylic acid	-3.24
Polar negative	Extraction pair I	362.051	C10H14N5O8P	[M-H]-	HMDB0001397	Guanosine monophosphate	0.35
Polar negative	Extraction pair I	369.005	C12H14O9S	[M+Cl]-	HMDB0060029	5-(3',4',5'-Trihydroxyphenyl)-gamma-valerolactone-O-methyl-O-sulphate	0.25
Polar negative	Extraction pair I	376.118	C17H19N5O3	[M+Cl]-	HMDB0028896	Histidinyl-Tryptophan	0.33
Polar negative	Extraction pair I	379.101	C12H24O11	[M+Cl]-	HMDB0002928	Maltitol	-1.17
Polar negative	Extraction pair I	383.114	C14H20N6O5S	[M-H]-	HMDB0000939	S-Adenosylhomocysteine	0.01
Polar negative	Extraction pair I	402.01	C9H15N3O11P2	[M-H]-	HMDB0001546	CDP	-1.22
Polar negative	Extraction pair I	402.994	C9H14N2O12P2||C10H13N2O11P	[M-H]-||[M+Cl]-	HMDB0000295||HMDB0000218	Uridine 5'-diphosphate||Orotidylic acid	-1.44||-1.87
Polar negative	Extraction pair I	405.096	C17H22O9	[M+Cl]-	HMDB0059980	4-Hydroxy-5-(phenyl)-valeric acid-O-glucuronide	0.07
Polar negative	Extraction pair I	419.091	C14H20N6O5S	[M+Cl]-	HMDB0000939	S-Adenosylhomocysteine	-0.78
Polar negative	Extraction pair I	425.08	C13H22N4O8S2	[M-H]-	HMDB0000656	Cysteineglutathione disulfide	-1.89
Polar negative	Extraction pair I	426.022	C10H15N5O10P2||C10H15N5O10P2	[M-H]-||[M-H]-	HMDB0000061||HMDB0001341	Adenosine 3',5'-diphosphate||ADP	-0.57||-0.57
Polar negative	Extraction pair I	442.017	C10H15N5O11P2	[M-H]-	HMDB0001201	Guanosine diphosphate	-0.3
Polar negative	Extraction pair I	443.174	C19H28O6S	[M+Hac-H]-	HMDB0062544	16a-hydroxy DHEA 3-sulfate	-0.48
Polar negative	Extraction pair I	448.307	C26H43NO5||C26H43NO5||C26H43NO5	[M-H]-||[M-H]-||[M-H]-	HMDB0000631||HMDB0000637||HMDB0000708	Deoxycholic acid glycine conjugate||Chenodeoxycholic acid glycine conjugate||Glycoursodeoxycholic acid	0.43||0.43||0.43
Polar negative	Extraction pair I	452.278	C21H44NO7P||C21H44NO7P	[M-H]-||[M-H]-	HMDB0011473||HMDB0011503	LysoPE(0:0/16:0)||LysoPE(16:0/0:0)	-0.31||-0.31
Polar negative	Extraction pair I	478.294	C23H46NO7P||C23H46NO7P||C23H46NO7P||C23H46NO7P	[M-H]-||[M-H]-||[M-H]-||[M-H]-	HMDB0011475||HMDB0011476||HMDB0011505||HMDB0011506	LysoPE(0:0/18:1(11Z))||LysoPE(0:0/18:1(9Z))||LysoPE(18:1(11Z)/0:0)||LysoPE(18:1(9Z)/0:0)	-0.3||-0.3||-0.3||-0.3
Polar negative	Extraction pair I	483.089	C18H24O13	[M+Cl]-	HMDB0059970	4-Hydroxy-5-(3',4',5'-trihydroxyphenyl)-valeric acid-O-methyl-O-glucuronide	-4.75
Polar negative	Extraction pair I	487.099	C14H26N4O11P2	[M-H]-	HMDB0001413	Citicoline	-1.18
Polar negative	Extraction pair I	498.289	C26H45NO6S||C26H45NO6S||C26H45NO6S	[M-H]-||[M-H]-||[M-H]-	HMDB0000874||HMDB0000896||HMDB0000951	Tauroursodeoxycholic acid||Taurodeoxycholic acid||Taurochenodesoxycholic acid	-0.02||-0.02||-0.02
Polar negative	Extraction pair I	557.96	C10H16N5O14P3	[M+Cl]-	HMDB0001273	Guanosine triphosphate	0.66
Polar negative	Extraction pair I	582.005	C10H16N5O14P3	[M+Hac-H]-	HMDB0001273	Guanosine triphosphate	0.31
Polar negative	Extraction pair I	599.32	C27H53O12P||C27H53O12P	[M-H]-||[M-H]-	HMDB0061696||HMDB0240261	1-Stearoylglycerophosphoinositol||LysoPI(18:0/0:0)	-0.33||-0.33
Polar negative	Extraction pair II	115.004	C4H4O4||C4H4O4	[M-H]-||[M-H]-	HMDB0000134||HMDB0000176	Fumaric acid||Maleic acid	1.48||1.48
Polar negative	Extraction pair II	128.018	C5H7NOS	[M-H]-	HMDB0033561	2-Acetyl-4,5-dihydrothiazole	0.84
Polar negative	Extraction pair II	130.062	C4H9N3O2||C4H9N3O2	[M-H]-||[M-H]-	HMDB0000064||HMDB0013222	Creatine||Beta-Guanidinopropionic acid	0.95||0.95
Polar negative	Extraction pair II	131.046	C4H8N2O3||C4H8N2O3||C4H8N2O3||C4H8N2O3||C4H8N2O3	[M-H]-||[M-H]-||[M-H]-||[M-H]-||[M-H]-	HMDB0000026||HMDB0000168||HMDB0011733||HMDB0012265||HMDB0062812	Ureidopropionic acid||L-Asparagine||Glycyl-glycine||N-Carbamoylsarcosine||N-carbamoyl-beta-alaninate	1.23||1.23||1.23||1.23||1.23
Polar negative	Extraction pair II	133.014	C2H2O3||C4H6O5||C4H6O5||C4H6O5	[M+Hac-H]-||[M-H]-||[M-H]-||[M-H]-	HMDB0000119||HMDB0000156||HMDB0000744||HMDB0031518	Glyoxylic acid||L-Malic acid||Malic acid||D-Malic acid	1.19||1.19||1.19||1.19
Polar negative	Extraction pair II	140.012	C3H7NO3||C3H7NO3||C2H8NO4P	[M+Cl]-||[M+Cl]-||[M-H]-	HMDB0000187||HMDB0003406||HMDB0000224	L-Serine||D-Serine||O-Phosphoethanolamine	0.49||0.49||1.74
Polar negative	Extraction pair II	143.046	C3H4N2O	[M+Hac-H]-	HMDB0004363	Imidazolone	0.34
Polar negative	Extraction pair II	148.044	C5H11NO2S||C5H11NO2S	[M-H]-||[M-H]-	HMDB0000696||HMDB0033951	L-Methionine||Racemethionine	0.51||0.51
Polar negative	Extraction pair II	152.002	C3H7NO4S||C3H7NO4S	[M-H]-||[M-H]-	HMDB0000996||HMDB0060179	3-Sulfinoalanine||3-Sulfinato-L-alaninate	0.73||0.73
Polar negative	Extraction pair II	154.028	C4H9NO3||C4H9NO3||C4H9NO3||C4H9NO3	[M+Cl]-||[M+Cl]-||[M+Cl]-||[M+Cl]-	HMDB0000167||HMDB0000719||HMDB0004041||HMDB0061877	L-Threonine||L-Homoserine||L-Allothreonine||4-Amino-3-hydroxybutyrate	-0.3||-0.3||-0.3||-0.3
Polar negative	Extraction pair II	162.023	C5H9NO3S	[M-H]-	HMDB0001890	Acetylcysteine	0.62
Polar negative	Extraction pair II	164.039	C5H11NO3S	[M-H]-	HMDB0002005	Methionine sulfoxide	0.77
Polar negative	Extraction pair II	171.078	C7H12N2O3||C7H12N2O3	[M-H]-||[M-H]-	HMDB0000721||HMDB0011178	Glycylproline||Prolylglycine	2.47||2.47
Polar negative	Extraction pair II	173.01	C6H6O6||C6H6O6||C6H6O6	[M-H]-||[M-H]-||[M-H]-	HMDB0000072||HMDB0000958||HMDB0001264	cis-Aconitic acid||trans-Aconitic acid||Dehydroascorbic acid	2.48||2.48||2.48
Polar negative	Extraction pair II	175.073	C6H12N2O4	[M-H]-	HMDB0028851	Glycyl-Threonine	2.33
Polar negative	Extraction pair II	176.056	C4H7NO3	[M+Hac-H]-	HMDB0000532	Acetylglycine	-4.31
Polar negative	Extraction pair II	176.057	C4H7NO3	[M+Hac-H]-	HMDB0000532	Acetylglycine	2.33
Polar negative	Extraction pair II	176.092	C5H11NO2||C5H11NO2||C5H11NO2	[M+Hac-H]-||[M+Hac-H]-||[M+Hac-H]-	HMDB0000883||HMDB0003355||HMDB0013716	L-Valine||5-Aminopentanoic acid||Norvaline	-3.85||-3.85||-3.85
Polar negative	Extraction pair II	176.093	C5H11NO2||C5H11NO2||C5H11NO2	[M+Hac-H]-||[M+Hac-H]-||[M+Hac-H]-	HMDB0000883||HMDB0003355||HMDB0013716	L-Valine||5-Aminopentanoic acid||Norvaline	2.32||2.32||2.32
Polar negative	Extraction pair II	177.034	C5H10N2O3S	[M-H]-	HMDB0000078	Cysteinylglycine	2.24
Polar negative	Extraction pair II	179.047	C8H8N2O3||C8H8N2O3	[M-H]-||[M-H]-	HMDB0003269||HMDB0059766	Nicotinuric acid||Picolinoylglycine	2.0||2.0
Polar negative	Extraction pair II	179.055	C4H8O4||C4H8O4||C4H8O4||C4H8O4||C4H8O4||C4H8O4||C4H8O4||C6H12O6||C6H12O6||C6H12O6||C6H12O6||C6H12O6||C6H12O6||C6H12O6||C6H12O6||C6H12O6||C6H12O6||C6H12O6||C6H12O6||C6H12O6||C6H12O6||C6H12O6||C6H12O6||C6H12O6	[M+Hac-H]-||[M+Hac-H]-||[M+Hac-H]-||[M+Hac-H]-||[M+Hac-H]-||[M+Hac-H]-||[M+Hac-H]-||[M-H]-||[M-H]-||[M-H]-||[M-H]-||[M-H]-||[M-H]-||[M-H]-||[M-H]-||[M-H]-||[M-H]-||[M-H]-||[M-H]-||[M-H]-||[M-H]-||[M-H]-||[M-H]-||[M-H]-	HMDB0000337||HMDB0000360||HMDB0000498||HMDB0002453||HMDB0002601||HMDB0002649||HMDB0006293||HMDB0000122||HMDB0000143||HMDB0000169||HMDB0000211||HMDB0000516||HMDB0000660||HMDB0001151||HMDB0001266||HMDB0003345||HMDB0003418||HMDB0003449||HMDB0006088||HMDB0033704||HMDB0034220||HMDB0061922||HMDB0240209||HMDB0240211	(S)-3,4-Dihydroxybutyric acid||2,4-Dihydroxybutanoic acid||4-Deoxyerythronic acid||4-Deoxythreonic acid||A,b-Dihydroxyisobutyric acid||Erythrose||L-Erythrulose||D-Glucose||D-Galactose||D-Mannose||myo-Inositol||Beta-D-Glucose||D-Fructose||Allose||L-Sorbose||Alpha-D-Glucose||D-Tagatose||Beta-D-Galactose||scyllo-Inositol||L-Galactose||Levoinositol||Alpha-D-Glucopyranoside||D-chiro-inositol||allo-ino…	-4.68||-4.68||-4.68||-4.68||-4.68||-4.68||-4.68||-4.68||-4.68||-4.68||-4.68||-4.68||-4.68||-4.68||-4.68||-4.68||-4.68||-4.68||-4.68||-4.68||-4.68||-4.68||-4.68||-4.68
Polar negative	Extraction pair II	179.056	C6H12O6||C6H12O6||C6H12O6||C6H12O6||C6H12O6||C6H12O6||C6H12O6||C6H12O6||C6H12O6||C6H12O6||C6H12O6||C6H12O6||C6H12O6||C6H12O6||C6H12O6||C6H12O6||C6H12O6||C4H8O4||C4H8O4||C4H8O4||C4H8O4||C4H8O4||C4H8O4||C4H8O4	[M-H]-||[M-H]-||[M-H]-||[M-H]-||[M-H]-||[M-H]-||[M-H]-||[M-H]-||[M-H]-||[M-H]-||[M-H]-||[M-H]-||[M-H]-||[M-H]-||[M-H]-||[M-H]-||[M-H]-||[M+Hac-H]-||[M+Hac-H]-||[M+Hac-H]-||[M+Hac-H]-||[M+Hac-H]-||[M+Hac-H]-||[M+Hac-H]-	HMDB0000122||HMDB0000143||HMDB0000169||HMDB0000211||HMDB0000516||HMDB0000660||HMDB0001151||HMDB0001266||HMDB0003345||HMDB0003418||HMDB0003449||HMDB0006088||HMDB0033704||HMDB0034220||HMDB0061922||HMDB0240209||HMDB0240211||HMDB0000337||HMDB0000360||HMDB0000498||HMDB0002453||HMDB0002601||HMDB0002649||HMDB0006293	D-Glucose||D-Galactose||D-Mannose||myo-Inositol||Beta-D-Glucose||D-Fructose||Allose||L-Sorbose||Alpha-D-Glucose||D-Tagatose||Beta-D-Galactose||scyllo-Inositol||L-Galactose||Levoinositol||Alpha-D-Glucopyranoside||D-chiro-inositol||allo-inositol||(S)-3,4-Dihydroxybutyric acid||2,4-Dihydroxybutanoic acid||4-Deoxyerythronic acid||4-Deoxythreonic acid||A,b-Dihydroxyisobutyric acid||Erythrose||L-Erythr…	1.68||1.68||1.68||1.68||1.68||1.68||1.68||1.68||1.68||1.68||1.68||1.68||1.68||1.68||1.68||1.68||1.68||1.68||1.68||1.68||1.68||1.68||1.68||1.68
Polar negative	Extraction pair II	182.045	C6H5NO2||C6H5NO2||C8H9NO4	[M+Hac-H]-||[M+Hac-H]-||[M-H]-	HMDB0001488||HMDB0002243||HMDB0000017	Nicotinic acid||Picolinic acid||4-Pyridoxic acid	-4.88||-4.88||-4.88
Polar negative	Extraction pair II	182.046	C8H9NO4||C6H5NO2||C6H5NO2	[M-H]-||[M+Hac-H]-||[M+Hac-H]-	HMDB0000017||HMDB0001488||HMDB0002243	4-Pyridoxic acid||Nicotinic acid||Picolinic acid	1.31||1.31||1.31
Polar negative	Extraction pair II	184.038	C2H8NO3P	[M+Hac-H]-	HMDB0011747	Ciliatine	1.7
Polar negative	Extraction pair II	184.109	C6H11N3||C6H11N3	[M+Hac-H]-||[M+Hac-H]-	HMDB0000898||HMDB0001861	1-Methylhistamine||3-Methylhistamine	1.44||1.44
Polar negative	Extraction pair II	184.986	C4H6O6||C3H7O7P||C3H7O7P||C3H7O7P||C3H7O7P	[M+Cl]-||[M-H]-||[M-H]-||[M-H]-||[M-H]-	HMDB0000956||HMDB0000362||HMDB0000807||HMDB0003391||HMDB0060180	Tartaric acid||2-Phosphoglyceric acid||3-Phosphoglyceric acid||2-Phospho-D-glyceric acid||(2R)-2-Hydroxy-3-(phosphonatooxy)propanoate	0.19||1.13||1.13||1.13||1.13
Polar negative	Extraction pair II	185.057	C7H10N2O4||C5H6N2O2||C5H6N2O2	[M-H]-||[M+Hac-H]-||[M+Hac-H]-	HMDB0061890||HMDB0000262||HMDB0002024	Pyroglutamylglycine||Thymine||Imidazoleacetic acid	0.98||0.99||0.99
Polar negative	Extraction pair II	189.052	C6H10N2O5||C9H14S	[M-H]-||[M+Cl]-	HMDB0015673||HMDB0040240	Carglumic acid||2-Pentylthiophene	0.77||4.32
Polar negative	Extraction pair II	190.054	C7H13NO3S	[M-H]-	HMDB0011745	N-Acetyl-L-methionine	0.83
Polar negative	Extraction pair II	192.034	C4H7NO2S	[M+Hac-H]-	HMDB0062164	Thioproline	0.81
Polar negative	Extraction pair II	196.038	C6H11NO4||C6H11NO4||C6H11NO4||C6H11NO4||C6H11NO4||C6H11NO4	[M+Cl]-||[M+Cl]-||[M+Cl]-||[M+Cl]-||[M+Cl]-||[M+Cl]-	HMDB0000510||HMDB0029423||HMDB0061715||HMDB0062557||HMDB0062660||HMDB0094716	Aminoadipic acid||Acetylhomoserine||Glutamate, gamma-methyl ester||N-Acetylthreonine||N-methyl-L-glutamic Acid||hydroxybutyrylglycine	0.18||0.18||0.18||0.18||0.18||0.18
Polar negative	Extraction pair II	197.034	C5H10N2O4	[M+Cl]-	HMDB0028850	Glycyl-Serine	0.91
Polar negative	Extraction pair II	201.125	C9H18N2O3||C9H18N2O3||C9H18N2O3||C9H18N2O3	[M-H]-||[M-H]-||[M-H]-||[M-H]-	HMDB0028690||HMDB0028691||HMDB0028900||HMDB0028922	Alanyl-Isoleucine||Alanyl-Leucine||Isoleucyl-Alanine||Leucyl-Alanine	0.89||0.89||0.89||0.89
Polar negative	Extraction pair II	203.068	C7H12N2O5	[M-H]-	HMDB0011667	gamma-Glutamylglycine	0.81
Polar negative	Extraction pair II	207.078	C10H12N2O3||C10H12N2O3	[M-H]-||[M-H]-	HMDB0000684||HMDB0012948	L-Kynurenine||Formyl-5-hydroxykynurenamine	1.04||1.04
Polar negative	Extraction pair II	209.111	C13H18	[M+Cl]-	HMDB0061824	1-Methyl-4-(1-methyl-2-propenyl)-benzene	4.76
Polar negative	Extraction pair II	210.029	C5H9N3O4||C4H10N3O5P	[M+Cl]-||[M-H]-	HMDB0003157||HMDB0001511	Guanidinosuccinic acid||Phosphocreatine	0.1||0.93
Polar negative	Extraction pair II	211.001	C6H8O6||C6H8O6	[M+Cl]-||[M+Cl]-	HMDB0000044||HMDB0031193	Ascorbic acid||1,2,3-Propanetricarboxylic acid	0.02||0.02
Polar negative	Extraction pair II	212.024	C3H7NO4S||C3H7NO4S	[M+Hac-H]-||[M+Hac-H]-	HMDB0000996||HMDB0060179	3-Sulfinoalanine||3-Sulfinato-L-alaninate	0.49||0.49
Polar negative	Extraction pair II	213.069	C11H14O2	[M+Cl]-	HMDB0002043	5-Phenylvaleric acid	0.06
Polar negative	Extraction pair II	217.083	C8H14N2O5||C8H14N2O5||C8H14N2O5	[M-H]-||[M-H]-||[M-H]-	HMDB0006248||HMDB0028686||HMDB0036301	gamma-Glutamylalanine||Alanyl-Glutamic acid||N-gamma-L-Glutamyl-D-alanine	0.54||0.54||0.54
Polar negative	Extraction pair II	218.023	C8H9NO4	[M+Cl]-	HMDB0000017	4-Pyridoxic acid	0.32
Polar negative	Extraction pair II	221.06	C7H14N2O4S	[M-H]-	HMDB0000099	L-Cystathionine	0.79
Polar negative	Extraction pair II	222.064	C6H5N5O	[M+Hac-H]-	HMDB0000802	Pterin	1.82
Polar negative	Extraction pair II	228.099	C7H11N3O2||C7H11N3O2	[M+Hac-H]-||[M+Hac-H]-	HMDB0000001||HMDB0000479	1-Methylhistidine||3-Methylhistidine	0.87||0.87
Polar negative	Extraction pair II	229.012	C6H10O7||C6H10O7||C6H10O7||C6H10O7||C6H10O7||C6H10O7||C6H10O7||C3H7O6P||C3H7O6P||C5H11O8P||C5H11O8P||C5H11O8P||C5H11O8P	[M+Cl]-||[M+Cl]-||[M+Cl]-||[M+Cl]-||[M+Cl]-||[M+Cl]-||[M+Cl]-||[M+Hac-H]-||[M+Hac-H]-||[M-H]-||[M-H]-||[M-H]-||[M-H]-	HMDB0000127||HMDB0002545||HMDB0002704||HMDB0003363||HMDB0003402||HMDB0011731||HMDB0011732||HMDB0001112||HMDB0001473||HMDB0000618||HMDB0000868||HMDB0001489||HMDB0001548	D-Glucuronic acid||Galacturonic acid||Iduronic acid||Pectic acid||Pectin||5-Keto-D-gluconate||2-Keto-L-gluconate||D-Glyceraldehyde 3-phosphate||Dihydroxyacetone phosphate||D-Ribulose 5-phosphate||Xylulose 5-phosphate||Ribose 1-phosphate||D-Ribose 5-phosphate	0.2||0.2||0.2||0.2||0.2||0.2||0.2||0.97||0.97||0.97||0.97||0.97||0.97
Polar negative	Extraction pair II	229.049	C7H14O6||C7H14O6	[M+Cl]-||[M+Cl]-	HMDB0029965||HMDB0034219	Methyl beta-D-glucopyranoside||D-Pinitol	0.74||0.74
Polar negative	Extraction pair II	229.156	C11H22N2O3||C11H22N2O3||C11H22N2O3||C11H22N2O3	[M-H]-||[M-H]-||[M-H]-||[M-H]-	HMDB0028920||HMDB0028942||HMDB0029130||HMDB0029131	Isoleucyl-Valine||Leucyl-Valine||Valyl-Isoleucine||Valyl-Leucine	0.82||0.82||0.82||0.82
Polar negative	Extraction pair II	233.078	C6H10N2O4||C6H10N2O4||C11H18OS	[M+Hac-H]-||[M+Hac-H]-||[M+Cl]-	HMDB0000854||HMDB0006028||HMDB0094658	Formiminoglutamic acid||N-Acetylasparagine||1-[2-Methyl-3-(methylthio) allyl]cyclohex-2-enol	0.95||0.95||3.84
Polar negative	Extraction pair II	239.078	C6H12O6||C6H12O6||C6H12O6||C6H12O6||C6H12O6||C6H12O6||C6H12O6||C6H12O6||C6H12O6||C6H12O6||C6H12O6||C6H12O6||C6H12O6||C6H12O6||C6H12O6||C6H12O6||C6H12O6||C7H8N4O2||C7H8N4O2	[M+Hac-H]-||[M+Hac-H]-||[M+Hac-H]-||[M+Hac-H]-||[M+Hac-H]-||[M+Hac-H]-||[M+Hac-H]-||[M+Hac-H]-||[M+Hac-H]-||[M+Hac-H]-||[M+Hac-H]-||[M+Hac-H]-||[M+Hac-H]-||[M+Hac-H]-||[M+Hac-H]-||[M+Hac-H]-||[M+Hac-H]-||[M+Hac-H]-||[M+Hac-H]-	HMDB0000122||HMDB0000143||HMDB0000169||HMDB0000211||HMDB0000516||HMDB0000660||HMDB0001151||HMDB0001266||HMDB0003345||HMDB0003418||HMDB0003449||HMDB0006088||HMDB0033704||HMDB0034220||HMDB0061922||HMDB0240209||HMDB0240211||HMDB0001860||HMDB0002825	D-Glucose||D-Galactose||D-Mannose||myo-Inositol||Beta-D-Glucose||D-Fructose||Allose||L-Sorbose||Alpha-D-Glucose||D-Tagatose||Beta-D-Galactose||scyllo-Inositol||L-Galactose||Levoinositol||Alpha-D-Glucopyranoside||D-chiro-inositol||allo-inositol||Paraxanthine||Theobromine	1.09||1.09||1.09||1.09||1.09||1.09||1.09||1.09||1.09||1.09||1.09||1.09||1.09||1.09||1.09||1.09||1.09||-4.51||-4.51
Polar negative	Extraction pair II	239.079	C7H8N4O2||C7H8N4O2	[M+Hac-H]-||[M+Hac-H]-	HMDB0001860||HMDB0002825	Paraxanthine||Theobromine	1.71||1.71
Polar negative	Extraction pair II	239.998	C9H7NO5S	[M-H]-	HMDB0060002	Indole-3-carboxilic acid-O-sulphate	1.26
Polar negative	Extraction pair II	241.012	C7H10O7||C7H10O7||C8H14O2S2	[M+Cl]-||[M+Cl]-||[M+Cl]-	HMDB0000379||HMDB0003518||HMDB0001451	2-Methylcitric acid||Homocitric acid||(R)-lipoic acid	0.35||0.35||-3.25
Polar negative	Extraction pair II	244.023	C3H8NO6P||C3H8NO6P	[M+Hac-H]-||[M+Hac-H]-	HMDB0000272||HMDB0001721	Phosphoserine||DL-O-Phosphoserine	1.46||1.46
Polar negative	Extraction pair II	245.043	C7H14O7||C6H15O8P||C8H10N4O3	[M+Cl]-||[M-H]-||[M+Cl]-	HMDB0003219||HMDB0240316||HMDB0002123	Sedoheptulose||Glycerophosphoglycerol||1,3,7-Trimethyluric acid	0.47||1.19||-4.99
Polar negative	Extraction pair II	245.045	C8H10N4O3	[M+Cl]-	HMDB0002123	1,3,7-Trimethyluric acid	1.68
Polar negative	Extraction pair II	245.115	C10H18N2O5||C10H18N2O5||C10H18N2O5||C10H18N2O5||C10H18N2O5||C8H14N2O3||C8H14N2O3	[M-H]-||[M-H]-||[M-H]-||[M-H]-||[M-H]-||[M+Hac-H]-||[M+Hac-H]-	HMDB0011172||HMDB0028757||HMDB0028832||HMDB0028903||HMDB0029126||HMDB0028695||HMDB0029010	gamma-Glutamylvaline||Aspartyl-Leucine||Glutamylvaline||Isoleucyl-Aspartate||Valyl-Glutamate||Alanyl-Proline||Prolyl-Alanine	0.89||0.89||0.89||0.89||0.89||0.89||0.89
Polar negative	Extraction pair II	246.008	C8H9NO6S||C8H9NO6S	[M-H]-||[M-H]-	HMDB0062547||HMDB0240380	2-Hydroxyacetaminophen sulfate||HHPAA sulfate	0.81||0.81
Polar negative	Extraction pair II	246.017	C9H9NO5||C8H10NO6P	[M+Cl]-||[M-H]-	HMDB0059999||HMDB0001491	Gentisuric acid||Pyridoxal 5'-phosphate	-0.06||0.65
Polar negative	Extraction pair II	247.073	C11H16O4	[M+Cl]-	HMDB0059744	3,4-Methyleneazelaic acid	-3.31
Polar negative	Extraction pair II	247.094	C7H12N2O4||C9H16N2O6	[M+Hac-H]-||[M-H]-	HMDB0006029||HMDB0029159	N-Acetylglutamine||gamma-Glutamylthreonine	1.03||1.03
Polar negative	Extraction pair II	249.055	C8H14N2O5S||C8H14N2O5S	[M-H]-||[M-H]-	HMDB0001049||HMDB0028816	gamma-Glutamylcysteine||Glutamylcysteine	0.65||0.65
Polar negative	Extraction pair II	258.039	C4H10NO6P	[M+Hac-H]-	HMDB0011185	O-Phosphothreonine	0.85
Polar negative	Extraction pair II	258.182	C12H25N3O3||C12H25N3O3	[M-H]-||[M-H]-	HMDB0028954||HMDB0028955	Lysyl-Isoleucine||Lysyl-Leucine	0.54||0.54
Polar negative	Extraction pair II	259.023	C6H13O9P||C6H13O9P||C6H13O9P||C6H13O9P||C4H9O7P||C6H13O9P||C6H13O9P||C6H13O9P	[M-H]-||[M-H]-||[M-H]-||[M-H]-||[M+Hac-H]-||[M-H]-||[M-H]-||[M-H]-	HMDB0000124||HMDB0000213||HMDB0000645||HMDB0001078||HMDB0001321||HMDB0001401||HMDB0001586||HMDB0002985	Fructose 6-phosphate||Myo-inositol 1-phosphate||Galactose 1-phosphate||Mannose 6-phosphate||D-Erythrose 4-phosphate||Glucose 6-phosphate||Glucose 1-phosphate||Inositol phosphate	1.03||1.03||1.03||1.03||1.03||1.03||1.03||1.03
Polar negative	Extraction pair II	259.13	C11H20N2O5||C11H20N2O5||C11H20N2O5||C11H20N2O5||C11H20N2O5||C11H20N2O5	[M-H]-||[M-H]-||[M-H]-||[M-H]-||[M-H]-||[M-H]-	HMDB0011170||HMDB0011171||HMDB0028822||HMDB0028823||HMDB0028906||HMDB0028928	gamma-Glutamylisoleucine||gamma-Glutamylleucine||Glutamylisoleucine||Glutamylleucine||Isoleucyl-Glutamate||Leucyl-Glutamate	0.49||0.49||0.49||0.49||0.49||0.49
Polar negative	Extraction pair II	260.024	C9H11NO6S||C9H11NO6S	[M-H]-||[M-H]-	HMDB0062550||HMDB0155722	2-Methoxyacetaminophen sulfate||O-Sulfotyrosine	0.81||0.81
Polar negative	Extraction pair II	265.12	C13H18N2O4||C13H18N2O4	[M-H]-||[M-H]-	HMDB0029005||HMDB0029068	Phenylalanyl-Threonine||Threoninyl-Phenylalanine	0.76||0.76
Polar negative	Extraction pair II	267.074	C10H12N4O5||C10H12N4O5||C10H12N4O5	[M-H]-||[M-H]-||[M-H]-	HMDB0000195||HMDB0000481||HMDB0003040	Inosine||Allopurinol riboside||Arabinosylhypoxanthine	0.7||0.7||0.7
Polar negative	Extraction pair II	269.088	C7H14O7||C8H10N4O3	[M+Hac-H]-||[M+Hac-H]-	HMDB0003219||HMDB0002123	Sedoheptulose||1,3,7-Trimethyluric acid	0.77||-4.2
Polar negative	Extraction pair II	272.054	C9H19NO2S2||C9H11N5O3||C9H11N5O3	[M+Cl]-||[M+Cl]-||[M+Cl]-	HMDB0013639||HMDB0000238||HMDB0000468	8-[(Aminomethyl)sulfanyl]-6-sulfanyloctanoic acid||Sepiapterin||Biopterin	-3.07||-4.79||-4.79
Polar negative	Extraction pair II	273.092	C9H14N2O2S	[M+Hac-H]-	HMDB0004822	Methyl bisnorbiotinyl ketone	3.23
Polar negative	Extraction pair II	274.105	C10H17N3O6||C10H17N3O6	[M-H]-||[M-H]-	HMDB0011738||HMDB0029147	N2-gamma-Glutamylglutamine||N-gamma-Glutamylglutamine	0.73||0.73
Polar negative	Extraction pair II	274.141	C11H21N3O5||C11H21N3O5||C11H21N3O5	[M-H]-||[M-H]-||[M-H]-	HMDB0003869||HMDB0004207||HMDB0029154	Epsilon-(gamma-Glutamyl)-lysine||Glutamyllysine||gamma-Glutamyllysine	0.87||0.87||0.87
Polar negative	Extraction pair II	275.018	C6H13O10P	[M-H]-	HMDB0001316	6-Phosphogluconic acid	0.79
Polar negative	Extraction pair II	279.058	C10H16N2O3S	[M+Cl]-	HMDB0000030	Biotin	0.62
Polar negative	Extraction pair II	280.104	C8H15NO6||C8H15NO6||C8H15NO6||C8H15NO6||C8H15NO6||C11H15N5O4||C11H15N5O4	[M+Hac-H]-||[M+Hac-H]-||[M+Hac-H]-||[M+Hac-H]-||[M+Hac-H]-||[M-H]-||[M-H]-	HMDB0000212||HMDB0000215||HMDB0000803||HMDB0000853||HMDB0001129||HMDB0003331||HMDB0004044	N-Acetylgalactosamine||N-Acetyl-D-glucosamine||beta-N-Acetylglucosamine||N-Acetyl-b-D-galactosamine||N-Acetylmannosamine||1-Methyladenosine||N6-Methyladenosine	0.78||0.78||0.78||0.78||0.78||-4.0||-4.0
Polar negative	Extraction pair II	289.033	C7H15O10P||C5H11O8P||C5H11O8P||C5H11O8P||C5H11O8P	[M-H]-||[M+Hac-H]-||[M+Hac-H]-||[M+Hac-H]-||[M+Hac-H]-	HMDB0001068||HMDB0000618||HMDB0000868||HMDB0001489||HMDB0001548	D-Sedoheptulose 7-phosphate||D-Ribulose 5-phosphate||Xylulose 5-phosphate||Ribose 1-phosphate||D-Ribose 5-phosphate	0.47||0.47||0.47||0.47||0.47
Polar negative	Extraction pair II	300.049	C8H16NO9P||C8H16NO9P	[M-H]-||[M-H]-	HMDB0001062||HMDB0001367	N-Acetyl-D-Glucosamine 6-Phosphate||N-Acetyl-glucosamine 1-phosphate	0.62||0.62
Polar negative	Extraction pair II	301.181	C19H26O3||C19H26O3||C19H26O3	[M-H]-||[M-H]-||[M-H]-	HMDB0000380||HMDB0000405||HMDB0003955	2-Hydroxyestradiol-3-methyl ether||2-Methoxyestradiol||19-Hydroxyandrost-4-ene-3,17-dione	0.7||0.7||0.7
Polar negative	Extraction pair II	303.051	C10H12N4O5||C10H12N4O5||C10H12N4O5	[M+Cl]-||[M+Cl]-||[M+Cl]-	HMDB0000195||HMDB0000481||HMDB0003040	Inosine||Allopurinol riboside||Arabinosylhypoxanthine	1.24||1.24||1.24
Polar negative	Extraction pair II	306.077	C10H17N3O6S	[M-H]-	HMDB0000125	Glutathione	0.12
Polar negative	Extraction pair II	307.074	C16H16O4	[M+Cl]-	HMDB0004810	5C-aglycone	-2.16
Polar negative	Extraction pair II	307.264	C20H36O2	[M-H]-	HMDB0005060	Eicosadienoic acid	0.32
Polar negative	Extraction pair II	308.077	C14H15NO7	[M-H]-	HMDB0010319	Indoxyl glucuronide	-3.13
Polar negative	Extraction pair II	308.985	C10H10O7S	[M+Cl]-	HMDB0029200	Ferulic acid 4-sulfate	1.56
Polar negative	Extraction pair II	309.076	C8H14N2O5S||C8H14N2O5S	[M+Hac-H]-||[M+Hac-H]-	HMDB0001049||HMDB0028816	gamma-Glutamylcysteine||Glutamylcysteine	-1.44||-1.44
Polar negative	Extraction pair II	311.048	C10H16N2O5S	[M+Cl]-	HMDB0004818	Biotin sulfone	1.47
Polar negative	Extraction pair II	316.117	C8H20NO6P	[M+Hac-H]-	HMDB0000086	Glycerophosphocholine	0.2
Polar negative	Extraction pair II	322.045	C9H14N3O8P||C9H14N3O8P	[M-H]-||[M-H]-	HMDB0000095||HMDB0240312	Cytidine monophosphate||Cytidine 3'-monophosphate	0.5||0.5
Polar negative	Extraction pair II	323.029	C10H12N2O8||C9H13N2O9P||C9H13N2O9P	[M+Cl]-||[M-H]-||[M-H]-	HMDB0000788||HMDB0000288||HMDB0060282	Orotidine||Uridine 5'-monophosphate||3'-UMP	0.01||0.55||0.55
Polar negative	Extraction pair II	327.233	C22H32O2	[M-H]-	HMDB0002183	Docosahexaenoic acid	0.29
Polar negative	Extraction pair II	329.249	C22H34O2||C22H34O2	[M-H]-||[M-H]-	HMDB0001976||HMDB0006528	Docosapentaenoic acid (22n-6)||Docosapentaenoic acid (22n-3)	-0.23||-0.23
Polar negative	Extraction pair II	330.179	C11H21N5O3	[M+Hac-H]-	HMDB0028717	Arginyl-Proline	2.76
Polar negative	Extraction pair II	331.192	C18H24O2	[M+Hac-H]-	HMDB0000151	Estradiol	0.09
Polar negative	Extraction pair II	332.059	C11H15N5O3S	[M+Cl]-	HMDB0001173	5'-Methylthioadenosine	-0.1
Polar negative	Extraction pair II	332.195	C11H23N5O3||C11H23N5O3	[M+Hac-H]-||[M+Hac-H]-	HMDB0028722||HMDB0029121	Arginyl-Valine||Valyl-Arginine	2.96||2.96
Polar negative	Extraction pair II	333.059	C9H19O11P	[M-H]-	HMDB0011649	1-(sn-Glycero-3-phospho)-1D-myo-inositol	0.32
Polar negative	Extraction pair II	334.126	C10H17N3O6||C10H17N3O6||C12H21N3O8	[M+Hac-H]-||[M+Hac-H]-||[M-H]-	HMDB0011738||HMDB0029147||HMDB0000489	N2-gamma-Glutamylglutamine||N-gamma-Glutamylglutamine||Aspartylglycosamine	-0.01||-0.01||-0.02
Polar negative	Extraction pair II	335.038	C6H13O10P	[M+Hac-H]-	HMDB0001316	6-Phosphogluconic acid	-2.47
Polar negative	Extraction pair II	337.054	C9H15N4O8P	[M-H]-	HMDB0001517	AICAR	-4.72
Polar negative	Extraction pair II	338.989	C6H14O12P2||C6H14O12P2	[M-H]-||[M-H]-	HMDB0001058||HMDB0003514	Fructose 1,6-bisphosphate||Alpha-D-Glucose 1,6-bisphosphate	0.19||0.19
Polar negative	Extraction pair II	343.091	C10H12N4O6	[M+Hac-H]-	HMDB0000299	Xanthosine	4.41
Polar negative	Extraction pair II	343.191	C21H28O4	[M-H]-	HMDB0004029	11-Dehydrocorticosterone	-0.1
Polar negative	Extraction pair II	346.056	C10H14N5O7P||C10H14N5O7P	[M-H]-||[M-H]-	HMDB0000045||HMDB0003540	Adenosine monophosphate||3'-AMP	0.25||0.25
Polar negative	Extraction pair II	356.103	C11H15N5O3S	[M+Hac-H]-	HMDB0001173	5'-Methylthioadenosine	0.09
Polar negative	Extraction pair II	357.077	C12H14N2O5S	[M+Hac-H]-	HMDB0060834	N-Acetylserotonin sulfate	1.53
Polar negative	Extraction pair II	362.051	C10H14N5O8P	[M-H]-	HMDB0001397	Guanosine monophosphate	0.35
Polar negative	Extraction pair II	363.218	C19H28O3||C21H32O5||C19H28O3	[M+Hac-H]-||[M-H]-||[M+Hac-H]-	HMDB0000352||HMDB0000903||HMDB0006031	16a-Hydroxydehydroisoandrosterone||Tetrahydrocortisone||11-Ketoetiocholanolone	0.07||0.07||0.07
Polar negative	Extraction pair II	367.018	C10H13N2O11P	[M-H]-	HMDB0000218	Orotidylic acid	-2.22
Polar negative	Extraction pair II	369.005	C12H14O9S	[M+Cl]-	HMDB0060029	5-(3',4',5'-Trihydroxyphenyl)-gamma-valerolactone-O-methyl-O-sulphate	0.25
Polar negative	Extraction pair II	376.118	C17H19N5O3	[M+Cl]-	HMDB0028896	Histidinyl-Tryptophan	0.33
Polar negative	Extraction pair II	379.101	C12H24O11	[M+Cl]-	HMDB0002928	Maltitol	-1.17
Polar negative	Extraction pair II	382.1	C14H17N5O8	[M-H]-	HMDB0000912	Succinyladenosine	-1.67
Polar negative	Extraction pair II	383.114	C14H20N6O5S	[M-H]-	HMDB0000939	S-Adenosylhomocysteine	0.01
Polar negative	Extraction pair II	388.177	C19H23NO4	[M+Hac-H]-	HMDB0003601	(S)-Reticuline	1.64
Polar negative	Extraction pair II	397.114	C18H22O10||C18H22O10||C18H22O10||C18H22O10	[M-H]-||[M-H]-||[M-H]-||[M-H]-	HMDB0029190||HMDB0059988||HMDB0059990||HMDB0060030	5-(3',4'-dihydroxyphenyl)-gamma-valerolactone-3'-O-glucuronide||5-(3',4'-Dihydroxyphenyl)-gamma-valerolactone-3'-O-methyl-4'-O-glucuronide||5-(3',4'-Dihydroxyphenyl)-gamma-valerolactone-4'-O-methyl-3'-O-glucuronide||5-(3',5'-Dihydroxyphenyl)-gamma-valerolactone-O-glucuronide-O-methyl	0.87||0.87||0.87||0.87
Polar negative	Extraction pair II	399.131	C16H20O8	[M+Hac-H]-	HMDB0060021	trans-isoeugenol-O-glucuronide	2.86
Polar negative	Extraction pair II	402.01	C9H15N3O11P2	[M-H]-	HMDB0001546	CDP	-1.22
Polar negative	Extraction pair II	402.994	C9H14N2O12P2||C10H13N2O11P	[M-H]-||[M+Cl]-	HMDB0000295||HMDB0000218	Uridine 5'-diphosphate||Orotidylic acid	-1.44||-1.87
Polar negative	Extraction pair II	405.096	C17H22O9	[M+Cl]-	HMDB0059980	4-Hydroxy-5-(phenyl)-valeric acid-O-glucuronide	0.07
Polar negative	Extraction pair II	419.091	C14H20N6O5S	[M+Cl]-	HMDB0000939	S-Adenosylhomocysteine	-0.78
Polar negative	Extraction pair II	419.207	C21H28O5||C21H28O5	[M+Hac-H]-||[M+Hac-H]-	HMDB0000037||HMDB0002802	Aldosterone||Cortisone	-0.97||-0.97
Polar negative	Extraction pair II	421.223	C21H30O5||C21H30O5	[M+Hac-H]-||[M+Hac-H]-	HMDB0000063||HMDB0000319	Cortisol||18-Hydroxycorticosterone	-0.3||-0.3
Polar negative	Extraction pair II	423.239	C21H32O5	[M+Hac-H]-	HMDB0000903	Tetrahydrocortisone	-0.3
Polar negative	Extraction pair II	424.919	C5H13O14P3	[M+Cl]-	HMDB0000280	Phosphoribosyl pyrophosphate	-4.78
Polar negative	Extraction pair II	425.08	C13H22N4O8S2	[M-H]-	HMDB0000656	Cysteineglutathione disulfide	-1.89
Polar negative	Extraction pair II	426.022	C10H15N5O10P2||C10H15N5O10P2	[M-H]-||[M-H]-	HMDB0000061||HMDB0001341	Adenosine 3',5'-diphosphate||ADP	-0.57||-0.57
Polar negative	Extraction pair II	427.039	C10H13N2O11P	[M+Hac-H]-	HMDB0000218	Orotidylic acid	-2.29
Polar negative	Extraction pair II	430.984	C12H19Cl3O8	[M+Cl]-	HMDB0031554	Sucralose	-0.75
Polar negative	Extraction pair II	442.017	C10H15N5O11P2	[M-H]-	HMDB0001201	Guanosine diphosphate	-0.3
Polar negative	Extraction pair II	445.053	C11H20N4O11P2	[M-H]-	HMDB0001564	CDP-Ethanolamine	0.59
Polar negative	Extraction pair II	448.307	C26H43NO5||C26H43NO5||C26H43NO5	[M-H]-||[M-H]-||[M-H]-	HMDB0000631||HMDB0000637||HMDB0000708	Deoxycholic acid glycine conjugate||Chenodeoxycholic acid glycine conjugate||Glycoursodeoxycholic acid	0.43||0.43||0.43
Polar negative	Extraction pair II	448.964	C5H13O14P3	[M+Hac-H]-	HMDB0000280	Phosphoribosyl pyrophosphate	-3.21
Polar negative	Extraction pair II	452.278	C21H44NO7P||C21H44NO7P	[M-H]-||[M-H]-	HMDB0011473||HMDB0011503	LysoPE(0:0/16:0)||LysoPE(16:0/0:0)	-0.31||-0.31
Polar negative	Extraction pair II	460.016	C12H19N4O7P2S	[M+Cl]-	HMDB0001372	Thiamine pyrophosphate	3.05
Polar negative	Extraction pair II	466.965	C9H15N2O14P3	[M-H]-	HMDB0001191	Deoxyuridine triphosphate	-3.24
Polar negative	Extraction pair II	478.294	C23H46NO7P||C23H46NO7P||C23H46NO7P||C23H46NO7P	[M-H]-||[M-H]-||[M-H]-||[M-H]-	HMDB0011475||HMDB0011476||HMDB0011505||HMDB0011506	LysoPE(0:0/18:1(11Z))||LysoPE(0:0/18:1(9Z))||LysoPE(18:1(11Z)/0:0)||LysoPE(18:1(9Z)/0:0)	-0.3||-0.3||-0.3||-0.3
Polar negative	Extraction pair II	482.961	C9H15N2O15P3	[M-H]-	HMDB0000285	Uridine triphosphate	-0.71
Polar negative	Extraction pair II	487.099	C14H26N4O11P2	[M-H]-	HMDB0001413	Citicoline	-1.18
Polar negative	Extraction pair II	489.992	C10H16N5O12P3	[M-H]-	HMDB0001532	Deoxyadenosine triphosphate	-3.37
Polar negative	Extraction pair II	498.289	C26H45NO6S||C26H45NO6S||C26H45NO6S	[M-H]-||[M-H]-||[M-H]-	HMDB0000874||HMDB0000896||HMDB0000951	Tauroursodeoxycholic acid||Taurodeoxycholic acid||Taurochenodesoxycholic acid	-0.02||-0.02||-0.02
Polar negative	Extraction pair II	505.989	C10H16N5O13P3	[M-H]-	HMDB0000538	Adenosine triphosphate	0.17
Polar negative	Extraction pair II	557.96	C10H16N5O14P3	[M+Cl]-	HMDB0001273	Guanosine triphosphate	0.66
Polar negative	Extraction pair II	565.048	C15H24N2O17P2||C15H24N2O17P2	[M-H]-||[M-H]-	HMDB0000286||HMDB0000302	Uridine diphosphate glucose||Uridine diphosphategalactose	0.23||0.23
Polar negative	Extraction pair II	572.482	C34H67NO3||C34H67NO3	[M+Cl]-||[M+Cl]-	HMDB0000790||HMDB0004949	N-Palmitoylsphingosine||Ceramide (d18:1/16:0)	0.05||0.05
Polar negative	Extraction pair II	579.027	C15H22N2O18P2	[M-H]-	HMDB0000935	Uridine diphosphate glucuronic acid	0.06
Polar negative	Extraction pair II	582.005	C10H16N5O14P3	[M+Hac-H]-	HMDB0001273	Guanosine triphosphate	0.31
Polar negative	Extraction pair II	599.32	C27H53O12P||C27H53O12P	[M-H]-||[M-H]-	HMDB0061696||HMDB0240261	1-Stearoylglycerophosphoinositol||LysoPI(18:0/0:0)	-0.33||-0.33
Polar negative	Extraction pair II	606.074	C17H27N3O17P2	[M-H]-	HMDB0000290	Uridine diphosphate-N-acetylglucosamine	-0.42
Polar negative	Extraction pair II	611.144	C20H32N6O12S2	[M-H]-	HMDB0003337	Oxidized glutathione	-0.76

## Sheet: S-3d-lipidpositive
measured m/z	molecular formula	adduct	LIPID MAPS ID	putative name	mass error (ppm)
194.022	C6H5ClO4||C6H5ClO4||C6H5ClO4||C6H5ClO4||C6H5ClO4	[M+NH4]+||[M+NH4]+||[M+NH4]+||[M+NH4]+||[M+NH4]+	(E,E)-3-chloromuconic acid||(Z,Z)-3-chloromuconic acid||2-chloromuconic acid||3-chloro-cis,cis-muconic acid||3-chloromuconic acid	LMFA01090148||LMFA01090149||LMFA01030967||LMFA01090153||LMFA01030976	4.03||4.03||4.03||4.03||4.03
201.052	C10H10O3||C10H10O3||C10H10O3||C10H10O3||C10H10O3||C10H10O3	[M+Na]+||[M+Na]+||[M+Na]+||[M+Na]+||[M+Na]+||[M+Na]+	10-hydroxy-8E-Decene-4,6-diynoic acid||10-hydroxy-8Z-Decene-4,6-diynoic acid||8S-hydroxy-2-Decene-4,6-diynoic acid||8S-hydroxy-2E-Decene-4,6-diynoic acid||9-oxo-2,4,5,7-decatetraenoic acid||Antibiotic LA-1	LMFA01030712||LMFA01030713||LMFA01030711||LMFA01030710||LMFA01060086||LMFA01031130	0.64||0.64||0.64||0.64||0.64||0.64
203.139	C9H15NO3	[M+NH4]+	N-pentanoyl-homoserine lactone	LMFA08030030	-0.11
204.123	C9H17NO4||C9H17NO4||C9H17NO4	[M+H]+||[M+H]+||[M+H]+	Acetyl-D-carnitine||Acetyl-L-carnitine||DL-Acetylcarnitine	LMFA07070049||LMFA07070050||LMFA07070060	-0.26||-0.26||-0.26
205.126	C10H20O2S	[M+H]+	Hexyl 3-mercaptobutanoate	LMFA07010907	3.34
207.051	C8H14O2S2||C7H10O7||C7H10O7	[M+H]+||[M+H]+||[M+H]+	Lipoic acid||(2R,3S)-2-methylcitric acid||(2S,3R)-3-hydroxybutane-1,2,3-tricarboxylic acid	LMFA01130001||LMFA01050442||LMFA01050444	-0.86||3.33||3.33
208.059	C10H6O4	[M+NH4]+	Deca-2,4,6-triynedioic acid	LMFA01031138	-4.6
213.085	C7H14N2O4	[M+Na]+	diamino-pimelic acid	LMFA01170102	0.33
217.046	C10H10O4||C10H10O4||C10H10O4||C10H10O4	[M+Na]+||[M+Na]+||[M+Na]+||[M+Na]+	2E,4E,6E,8E-Decatetraenedioic acid||2E,4E,6Z,8Z-Decatetraenedioic acid||2E,4Z,6Z,8Z-Decatetraenedioic acid||Deca-4,6,8-triyne-1,1,2,3-tetraol	LMFA01170005||LMFA01170003||LMFA01170004||LMFA05000711	-4.06||-4.06||-4.06||-4.06
218.139	C10H16O4||C10H16O4||C10H16O4||C10H16O4||C10H16O4||C10H16O4||C10H16O4||C10H16O4||C10H19NO4||C10H19NO4||C10H19NO4	[M+NH4]+||[M+NH4]+||[M+NH4]+||[M+NH4]+||[M+NH4]+||[M+NH4]+||[M+NH4]+||[M+NH4]+||[M+H]+||[M+H]+||[M+H]+	2,6R-Dimethyl-2E-octen-1,8-dioic acid||2E-Decenedioic acid||3,6-dioxo-decanoic acid||4E-Decenedioic acid||4Z-Decenedioic acid||6,9-dioxo-decanoic acid||Callosobruchusic acid||Cladosporacid E||O-propanoyl-D-carnitine||O-propanoyl-carnitine||Propionylcarnitine	LMFA01170132||LMFA01170032||LMFA01060079||LMFA01170044||LMFA01170045||LMFA01060080||LMFA01170131||LMFA01050579||LMFA07070099||LMFA07070005||LMFA07070105	-0.23||-0.23||-0.23||-0.23||-0.23||-0.23||-0.23||-0.23||-0.24||-0.24||-0.24
219.134	C9H18N2O4||C9H15NO4	[M+H]+||[M+NH4]+	N-(3-carboxypropanoyl)-N-hydroxycadaverine||N-(3-hydroxy-pentanoyl)-homoserine lactone	LMFA08020187||LMFA08030032	0.0||0.01
223.075	C15H10O2	[M+H]+	Flavone	LMPK12110097	-3.18
224.027	C7H11BrO2||C7H11BrO2	[M+NH4]+||[M+NH4]+	3-bromo-2E-heptenoic acid||3-bromo-2Z-heptenoic acid	LMFA01090079||LMFA01090001	-3.5||-3.5
226.105	C9H17NO4||C9H17NO4||C9H17NO4	[M+Na]+||[M+Na]+||[M+Na]+	Acetyl-D-carnitine||Acetyl-L-carnitine||DL-Acetylcarnitine	LMFA07070049||LMFA07070050||LMFA07070060	-0.17||-0.17||-0.17
227.108	C10H20O2S	[M+Na]+	Hexyl 3-mercaptobutanoate	LMFA07010907	3.03
232.154	C11H18O4||C11H21NO4||C11H21NO4||C11H21NO4	[M+NH4]+||[M+H]+||[M+H]+||[M+H]+	Pantheric Acid C||Butyrylcarnitine||Isobutyryl-L-carnitine||O-butanoyl-carnitine	LMFA01170139||LMFA07070054||LMFA07070075||LMFA07070003	-0.4||-0.41||-0.41||-0.41
232.959	C5H11AsO2S	[M+Na]+	3-thiodimethylarsenopropanoic acid	LMFA00000040	-0.19
237.089	C14H14O2||C14H14O2||C14H14O2||C14H14O2	[M+Na]+||[M+Na]+||[M+Na]+||[M+Na]+	4,4-dihydroxybibenzyl||4E,6E,12Z-Tetradecatriene-8,10-diynoic acid||Dihydropinosylvin||Lunularin	LMPK13090042||LMFA01031065||LMPK13090034||LMPK13090039	0.58||0.58||0.58||0.58
240.102	C15H10O2	[M+NH4]+	Flavone	LMPK12110097	-0.19
240.121	C10H19NO4||C10H19NO4||C10H19NO4	[M+Na]+||[M+Na]+||[M+Na]+	O-propanoyl-D-carnitine||O-propanoyl-carnitine||Propionylcarnitine	LMFA07070099||LMFA07070005||LMFA07070105	-0.33||-0.33||-0.33
241.116	C9H18N2O4	[M+Na]+	N-(3-carboxypropanoyl)-N-hydroxycadaverine	LMFA08020187	-0.18
241.155	C12H17NO3	[M+NH4]+	Cerulenin	LMFA08010013	-0.03
242.019	C6H13AsO2S	[M+NH4]+	4-thiodimethylarsenobutanoic acid	LMFA00000041	-0.31
245.056	C15H10O2	[M+Na]+	Flavone	LMPK12110097	-3.32
246.17	C12H20O4||C12H20O4||C12H20O4||C12H20O4||C12H20O4||C12H20O4||C12H20O4||C12H20O4||C12H20O4||C12H20O4||C12H23NO4||C12H23NO4||C12H23NO4||C12H23NO4||C12H23NO4	[M+NH4]+||[M+NH4]+||[M+NH4]+||[M+NH4]+||[M+NH4]+||[M+NH4]+||[M+NH4]+||[M+NH4]+||[M+NH4]+||[M+NH4]+||[M+H]+||[M+H]+||[M+H]+||[M+H]+||[M+H]+	(-)-11-hydroxy-9,10-dihydrojasmonic acid||(-)-12-hydroxy-9,10-dihydrojasmonic acid||2Z-Dodecenedioic acid||3Z-dodecenedioic acid||9,12-dioxo-dodecanoic acid||9-hydroxy-traumatin||Cladosporacid D||Gallicynoic acid G||Ieodomycin C||Traumatic acid||2-Methylbutyroylcarnitine||Isovalerylcarnitine||Valerylcarnitine||isovaleryl-L-carnitine||pivaloylcarnitine	LMFA02020012||LMFA02020015||LMFA01170033||LMFA01170137||LMFA01060092||LMFA01050566||LMFA01050580||LMFA01050570||LMFA01050564||LMFA01170002||LMFA07070034||LMFA07070076||LMFA07070111||LMFA07070077||LMFA07070103	-0.63||-0.63||-0.63||-0.63||-0.63||-0.63||-0.63||-0.63||-0.63||-0.63||-0.64||-0.64||-0.64||-0.64||-0.64
247.058	C11H12O5	[M+Na]+	4-methyl-5-carboxyethyl-2-furanacrylic acid	LMFA01150052	-0.47
250.093	C10H19NO2S2||C10H19NO2S2	[M+H]+||[M+H]+	S-Acetyldihydrolipoamide||S-Acetyldihydrolipoamide-E	LMFA08010023||LMFA08020202	1.37||1.37
250.996	C13H8S2	[M+Na]+	Thiorubrine A	LMFA12000371	-0.52
253.12	C15H18O2||C15H18O2||C15H18O2	[M+Na]+||[M+Na]+||[M+Na]+	(2E,8Z)-Decadiene-4,6-diyn-1-yl 3-methylbutanoate||15-octadecene-9,11,13-triynoic acid||6,8,10-Pentadecatriynoic acid	LMFA07010699||LMFA01030559||LMFA01031107	0.19||0.19||0.19
254.136	C11H21NO4||C11H21NO4||C11H21NO4||C9H20N2OS2	[M+Na]+||[M+Na]+||[M+Na]+||[M+NH4]+	Butyrylcarnitine||Isobutyryl-L-carnitine||O-butanoyl-carnitine||S-aminomethyldihydrolipoamide	LMFA07070054||LMFA07070075||LMFA07070003||LMFA08010025	-0.6||-0.6||-0.6||2.35
255.136	C15H20O2||C15H20O2||C15H20O2||C12H18F4O	[M+Na]+||[M+Na]+||[M+Na]+||[M+H]+	(Z)-8-Decene-4,6-diyn-1-yl 3-methylbutanoate||10E-Pentadecen-6,8-diynoic acid||alantolactone||8,9,10,11-Tetrafluoro-8E,10E-dodecadien-1-ol	LMFA07010705||LMFA01031097||LMPR0103190013||LMFA05000168	0.39||0.39||0.39||-3.94
267.099	C10H19O6P||C15H16O3	[M+H]+||[M+Na]+	10-phospho-2E-decenoic acid||Batatasin IV	LMFA01050430||LMPK13090032	0.15||0.29
268.152	C12H23NO4||C12H23NO4||C12H23NO4||C12H23NO4||C12H23NO4	[M+Na]+||[M+Na]+||[M+Na]+||[M+Na]+||[M+Na]+	2-Methylbutyroylcarnitine||Isovalerylcarnitine||Valerylcarnitine||isovaleryl-L-carnitine||pivaloylcarnitine	LMFA07070034||LMFA07070076||LMFA07070111||LMFA07070077||LMFA07070103	-0.4||-0.4||-0.4||-0.4||-0.4
282.096	C11H17NO6	[M+Na]+	Fumarycarnitine	LMFA07070064	4.88
284.126	C10H19O6P	[M+NH4]+	10-phospho-2E-decenoic acid	LMFA01050430	0.03
285.052	C17H10O3	[M+Na]+	Furano[2,3:6,7]aurone	LMPK12130001	-2.19
293.115	C17H18O3||C17H18O3||C17H18O3||C17H18O3||C17H18O3	[M+Na]+||[M+Na]+||[M+Na]+||[M+Na]+||[M+Na]+	(R)-5-Hydroxy-2,4-dimethoxydalbergiquinol||4-Hydrocinnamoyl-2,2,5-trimethyl-4-cyclopentene-1,3-dione||4-Hydroxy-7-methoxy-8-methylflavan||7-Hydroxy-5-methoxy-6-methylflavan||Tephrowatsin E	LMPK12100068||LMPK12120611||LMPK12020231||LMPK12020257||LMPK12020259	0.47||0.47||0.47||0.47||0.47
304.991	C12H10O4S2	[M+Na]+	(E)-4-(6-((formyloxy)methyl)-1,2-dithiin-3-yl)but-1-en-3-yn-1-yl acetate	LMFA12000369	-0.23
316.986	C16H9ClOS2	[M+H]+	1-chloro-3-(5-(penta-1,3-diyn-1-yl)-[2,2-bithiophen]-5-yl)prop-2-yn-1-ol	LMFA12000360	1.8
317.085	C11H18O9||C11H18O9	[M+Na]+||[M+Na]+	6-O-(3R,4-dihydroxy-2-methylene-butanoyl)-beta-D-glucopyranose||Tuliposide B	LMSL05000003||LMFA13010038	1.43||1.43
329.211	C21H28O3||C21H28O3	[M+H]+||[M+H]+	9,11alpha-epoxypregn-4-ene-3,20-dione||megestrol	LMST02030160||LMST02030177	-0.07||-0.07
332.077	C16H10O7||C16H10O7||C16H10O7||C16H10O7||C16H10O7	[M+NH4]+||[M+NH4]+||[M+NH4]+||[M+NH4]+||[M+NH4]+	2,3,8,10-Tetrahydroxy[2]benzopyrano[4,3-b][1]benzopyran-7(5H)-one||5-Hydroxybowdichione||Fasciculiferin||Gomphrenol||Wedelolactone	LMPK12113387||LMPK12050445||LMPK12113390||LMPK12112878||LMPK12090046	2.57||2.57||2.57||2.57||2.57
333.072	C18H14O5	[M+Na]+	Hoslundal	LMPK12110172	-3.75
337.274	C21H36O3||C21H36O3||C21H36O3||C21H36O3||C21H36O3||C21H36O3	[M+H]+||[M+H]+||[M+H]+||[M+H]+||[M+H]+||[M+H]+	10-(3,4-dimethyl-5-pentylfuran-2-yl)-decanoic acid||11-(3,4-dimethyl-5-butylfuran-2-yl)-undecanoic acid||11-(3-methyl-5-pentylfuran-2-yl)-undecanoic acid||5-(2R-hydroxy-pentadecyl)resorcinol||methyl 5R,6R-epoxy-7-eicosynoate||methyl 5S,6R-epoxy-7-eicosynoate	LMFA01150029||LMFA01150021||LMFA01150013||LMPK15030042||LMFA01070041||LMFA01070044	-0.48||-0.48||-0.48||-0.48||-0.48||-0.48
343.034	C16H13ClO5	[M+Na]+	8-Chloro-5,7,4-trihydroxy-3-C-methylflavanone	LMPK12140304	-2.43
343.174	C15H28O7||C15H28O7	[M+Na]+||[M+Na]+	bhas#10||bhos#10	LMFA13040053||LMFA13040094	4.18||4.18
343.345	C21H44NO2	[M+H]+	N,N,N-trimethyl-sphingosine	LMSP01080057	1.98
344.351	C21H42O2||C21H42O2||C21H42O2||C21H42O2||C21H42O2||C21H42O2||C21H42O2||C21H42O2||C21H42O2||C21H42O2||C21H42O2||C21H42O2||C21H42O2||C21H42O2||C21H42O2	[M+NH4]+||[M+NH4]+||[M+NH4]+||[M+NH4]+||[M+NH4]+||[M+NH4]+||[M+NH4]+||[M+NH4]+||[M+NH4]+||[M+NH4]+||[M+NH4]+||[M+NH4]+||[M+NH4]+||[M+NH4]+||[M+NH4]+	10,14-Dimethylpentadecyl butyrate||10,14-Dimethylpentadecyl isobutyrate||12,18-dimethyl-nonadecanoic acid||19-methyl-eicosanoic acid||2,6-dimethyl-nonadecanoic acid||20:0(12Me)||3-Methyl-2-butenyl hexadecanoate||Heneicosylic acid||Homophytanic acid||Methylarachidic acid||dodecyl nonanoate||hexadecyl 2-methyl-butanoate||octadecyl propionate||pentadecyl hexanoate||propyl stearate	LMFA07010556||LMFA07010649||LMFA01020420||LMFA01020223||LMFA01020033||LMFA01020356||LMFA07010576||LMFA01010021||LMPR0104010038||LMFA01020018||LMFA07010453||LMFA07010509||LMFA07010416||LMFA07010443||LMFA07011006	-2.52||-2.52||-2.52||-2.52||-2.52||-2.52||-2.52||-2.52||-2.52||-2.52||-2.52||-2.52||-2.52||-2.52||-2.52
349.141	C20H22O4||C20H22O4||C20H22O4||C20H22O4||C20H22O4	[M+Na]+||[M+Na]+||[M+Na]+||[M+Na]+||[M+Na]+	(+)-Acutifolin A||2,4,6-Trihydroxy-3-prenyldihydrochalcone||2,6-Dihydroxy-4-prenyloxydihydrochalcone||Broussinol||Cyclomillinol	LMPK12020281||LMPK12120482||LMPK12120484||LMPK12020005||LMPK12080006	-0.06||-0.06||-0.06||-0.06||-0.06
359.091	C22H14O5	[M+H]+	5,7-Dihydroxyflavone 7-benzoate	LMPK12110191	-0.56
360.326	C24H41NO||C24H41NO||C24H41NO||C24H41NO||C24H41NO||C24H41NO||C24H41NO	[M+H]+||[M+H]+||[M+H]+||[M+H]+||[M+H]+||[M+H]+||[M+H]+	(+)N-(1S-methyl-propyl) arachidonoyl amine||(-)N-(1R-methyl-propyl) arachidonoyl amine||N,N-diethyl arachidonoyl amine||N-butyl arachidonoyl amine||N-isopropyl alpha-methylarachidonoyl amine||N-propyl alpha-methyl arachidonoyl amine||N-tert-butyl arachidonoyl amine	LMFA08020017||LMFA08020016||LMFA08020024||LMFA08020011||LMFA08020035||LMFA08020033||LMFA08020012	-1.63||-1.63||-1.63||-1.63||-1.63||-1.63||-1.63
361.079	C19H21BrO2||C19H21BrO2||C19H21BrO2	[M+H]+||[M+H]+||[M+H]+	Methyl 18-bromo-13E,17E-octadecatrien-5,7,15-triynoate||Methyl 18-bromo-9E,17E-octadecadien-5,7,15-triynoate||Methyl 18-bromo-9Z,17E-octadecadien-5,7,15-triynoate	LMFA01090132||LMFA01090125||LMFA01090126	-3.24||-3.24||-3.24
362.232	C21H28O4||C21H28O4	[M+NH4]+||[M+NH4]+	11-Dehydrocorticosterone||Formyldienolone	LMST02030192||LMST02020026	-0.56||-0.56
363.216	C21H30O5||C21H30O5||C21H30O5||C21H30O5||C21H30O5||C21H30O5||C21H30O5||C21H30O5||C21H30O5||C21H30O5	[M+H]+||[M+H]+||[M+H]+||[M+H]+||[M+H]+||[M+H]+||[M+H]+||[M+H]+||[M+H]+||[M+H]+	11b,21-Dihydroxy-3,20-oxo-5b-pregnan-18-al||11beta,20-Dihydroxy-3-oxopregn-4-en-21-oic acid||18-Hydroxycorticosterone||1alpha,17alpha,21-trihydroxy-20-oxo-22,23,24,25,26,27-hexanorvitamin D3 / 1alpha,17alpha,21-trihydroxy-20-oxo-22,23,24,25,26,27-hexanorcholecalciferol||20alpha-DHOPA||4,5alpha-Dihydrocortisone||4,5beta-Dihydrocortisone||Cortisol||Lophachinin B||poststerone	LMST02030187||LMST02030223||LMST02030091||LMST03020005||LMST02030224||LMST02030096||LMST02030095||LMST02030001||LMPR0104050018||LMST02030165	-0.52||-0.52||-0.52||-0.52||-0.52||-0.52||-0.52||-0.52||-0.52||-0.52
365.232	C21H32O5||C21H32O5||C21H32O5||C21H32O5||C21H32O5	[M+H]+||[M+H]+||[M+H]+||[M+H]+||[M+H]+	11beta,17alpha,21-trihydroxypregnenolone||3a,11b,21-Trihydroxy-20-oxo-5b-pregnan-18-al||Dihydrocortisol||Insignin A||Urocortisone	LMST02030166||LMST02030197||LMST02030204||LMST02030222||LMST02030098	-0.72||-0.72||-0.72||-0.72||-0.72
366.096	C20H12O6	[M+NH4]+	Tephcalostan B	LMPK12090002	-2.43
367.083	C20H14O7||C20H14O7||C20H14O7||C20H14O7	[M+H]+||[M+H]+||[M+H]+||[M+H]+	12a-Methoxydolineone||3-Methoxypongapin||Neofolin||Pachyrrhizone	LMPK12060034||LMPK12111576||LMPK12160016||LMPK12060023	4.16||4.16||4.16||4.16
372.311	C21H38O4||C21H38O4||C21H38O4||C21H38O4||C21H38O4||C21H41NO4||C21H41NO4||C21H41NO4	[M+NH4]+||[M+NH4]+||[M+NH4]+||[M+NH4]+||[M+NH4]+||[M+H]+||[M+H]+||[M+H]+	2-linoleoyl-sn-glycerol||Ceriporic acid B||MG(18:2(9Z,12Z)/0:0/0:0)[rac]||PGF2alpha methyl ether||Persenone B||N-stearoyl serine||O-tetradecanoylcarnitine||Tetradecanoylcarnitine	LMGL01010033||LMFA01170125||LMGL01010006||LMFA03010073||LMFA05000719||LMFA08020102||LMFA07070102||LMFA07070107	-0.28||-0.28||-0.28||-0.28||-0.28||-0.28||-0.28||-0.28
375.09	C15H25Cl3O4	[M+H]+	Chlorosphaerolactylate D	LMFA07090122	2.62
380.134	C18H18O8	[M+NH4]+	5,7,3-Trihydroxy-6,4,5-trimethoxyflavanone	LMPK12140637	-0.44
380.425	C26H50||C26H50	[M+NH4]+||[M+NH4]+	5,9-Hexacosadiene||9,10-Hexacosadiene	LMFA11000452||LMFA11000533	-0.45||-0.45
381.073	C22H14O5	[M+Na]+	5,7-Dihydroxyflavone 7-benzoate	LMPK12110191	-0.27
383.06	C19H21BrO2||C19H21BrO2||C19H21BrO2	[M+Na]+||[M+Na]+||[M+Na]+	Methyl 18-bromo-13E,17E-octadecatrien-5,7,15-triynoate||Methyl 18-bromo-9E,17E-octadecadien-5,7,15-triynoate||Methyl 18-bromo-9Z,17E-octadecadien-5,7,15-triynoate	LMFA01090132||LMFA01090125||LMFA01090126	-3.23||-3.23||-3.23
385.346	C27H44O||C27H44O||C27H44O||C27H44O||C27H44O||C27H44O||C27H44O||C27H44O||C27H44O||C27H44O||C27H44O||C27H44O||C27H44O||C27H44O||C27H44O||C27H44O||C27H44O||C27H44O||C27H44O||C27H44O||C27H44O||C27H44O||C27H44O||C27H44O||C27H44O||C27H44O||C27H44O||C27H44O||C27H44O||C27H44O||C27H44O||C27H44O||C27H44O||C27H44O||C27H44O	[M+H]+||[M+H]+||[M+H]+||[M+H]+||[M+H]+||[M+H]+||[M+H]+||[M+H]+||[M+H]+||[M+H]+||[M+H]+||[M+H]+||[M+H]+||[M+H]+||[M+H]+||[M+H]+||[M+H]+||[M+H]+||[M+H]+||[M+H]+||[M+H]+||[M+H]+||[M+H]+||[M+H]+||[M+H]+||[M+H]+||[M+H]+||[M+H]+||[M+H]+||[M+H]+||[M+H]+||[M+H]+||[M+H]+||[M+H]+||[M+H]+	(25S)-24S,26-cyclo-5alpha-cholestan-3beta-ol||(3S,6R)-9,10-seco-5(10),6,7-cholestatrien-3-ol||(3S,6S)-9,10-seco-5(10),6,7-cholestatrien-3-ol||(5E)-3-epivitamin D3 / (5E)-3-epicholecalciferol||(5E)-isovitamin D3 / (5E)-isocholecalciferol||(5E)-vitamin D3 / (5E)-cholecalciferol / (5E)-calciol||(7E)-(3S,6S)-6,19-cyclo-9,10-seco-5(10),7-cholestadien-3-ol||1-(5alpha)-cholestenone||1alpha-hydroxy-3-deo…	LMST01110015||LMST03020229||LMST03020228||LMST03020221||LMST03020225||LMST03020220||LMST03020230||LMST01010349||LMST03020217||LMST01010095||LMST01010317||LMST01110008||LMST01031048||LMST03020619||LMST03020648||LMST03020219||LMST01010248||LMST01010351||LMST01010350||LMST01010239||LMST01010206||LMST01010069||LMST01010242||LMST01010015||LMST01010286||LMST01010016||LMST01010247||LMST01031049||LMST030…	-0.34||-0.34||-0.34||-0.34||-0.34||-0.34||-0.34||-0.34||-0.34||-0.34||-0.34||-0.34||-0.34||-0.34||-0.34||-0.34||-0.34||-0.34||-0.34||-0.34||-0.34||-0.34||-0.34||-0.34||-0.34||-0.34||-0.34||-0.34||-0.34||-0.34||-0.34||-0.34||-0.34||-0.34||-0.34
387.214	C21H32O5||C21H32O5||C21H32O5||C21H32O5||C21H32O5	[M+Na]+||[M+Na]+||[M+Na]+||[M+Na]+||[M+Na]+	11beta,17alpha,21-trihydroxypregnenolone||3a,11b,21-Trihydroxy-20-oxo-5b-pregnan-18-al||Dihydrocortisol||Insignin A||Urocortisone	LMST02030166||LMST02030197||LMST02030204||LMST02030222||LMST02030098	-0.63||-0.63||-0.63||-0.63||-0.63
390.989	C15H20Br2O2||C15H20Br2O2||C15H20Br2O2||C15H20Br2O2	[M+H]+||[M+H]+||[M+H]+||[M+H]+	Thuwalallene C||Thuwalallene E||thuwalenyne A||thuwalenyne B	LMPK02000059||LMPK02000060||LMPK02000062||LMPK02000063	-3.84||-3.84||-3.84||-3.84
397.022	C16H12O10S||C16H12O10S||C16H12O10S||C16H12O10S||C16H12O10S||C16H12O10S||C16H12O10S||C16H12O10S	[M+H]+||[M+H]+||[M+H]+||[M+H]+||[M+H]+||[M+H]+||[M+H]+||[M+H]+	6-Hydroxykaempferol 3-methyl ether 7-O-sulfate||6-Hydroxyluteolin 3-methyl ether 7-sulfate||6-Methoxykaempferol 3-O-sulfate||6-Methoxyluteolin 7-sulfate||Isorhamnetin 7-O-sulfate||Persicarin||Rhamnetin 3-O-sulfate||Tamarixetin 3-O-sulfate	LMPK12112881||LMPK12111256||LMPK12112882||LMPK12111254||LMPK12112397||LMPK12112396||LMPK12112625||LMPK12110607	-0.4||-0.4||-0.4||-0.4||-0.4||-0.4||-0.4||-0.4
397.072	C15H25Cl3O4	[M+Na]+	Chlorosphaerolactylate D	LMFA07090122	2.6
397.141	C24H22O4	[M+Na]+	4-Hydroxy-4-(4-hydroxystyryl)-7-methoxyflavan	LMPK12020228	0.42
398.326	C23H40O4||C23H40O4||C23H40O4||C23H40O4||C23H40O4||C23H40O4||C23H40O4||C23H43NO4||C23H43NO4	[M+NH4]+||[M+NH4]+||[M+NH4]+||[M+NH4]+||[M+NH4]+||[M+NH4]+||[M+NH4]+||[M+H]+||[M+H]+	24-Nor-5beta-cholane-3alpha,12alpha,22,23-tetrol||24-Nor-5beta-cholane-3alpha,7alpha,12alpha,23-tetrol||24-Nor-5beta-cholane-3alpha,7alpha,22,23-tetrol||24-Nor-5beta-cholane-3alpha,7beta,22,23-tetrol||Isopersin||Persin||Sciadonoyl-2-glycerol||O-palmitoleoylcarnitine||trans-Hexadec-2-enoyl carnitine	LMST04060006||LMST04060003||LMST04060004||LMST04060005||LMFA05000670||LMFA05000011||LMGL01010036||LMFA07070097||LMFA07070109	-0.36||-0.36||-0.36||-0.36||-0.36||-0.36||-0.36||-0.37||-0.37
399.144	C22H22O7||C22H22O7||C22H22O7||C22H22O7||C22H22O7||C22H22O7||C22H22O7||C22H22O7||C22H22O7||C22H22O7||C22H22O7||C22H22O7||C22H22O7||C22H22O7||C22H22O7||C22H22O7||C22H22O7||C22H22O7	[M+H]+||[M+H]+||[M+H]+||[M+H]+||[M+H]+||[M+H]+||[M+H]+||[M+H]+||[M+H]+||[M+H]+||[M+H]+||[M+H]+||[M+H]+||[M+H]+||[M+H]+||[M+H]+||[M+H]+||[M+H]+	2-Hydroxypiscerythrinetin||3-Angeloyloxy-4,6-dihydroxy-2,5-dimethoxychalcone||5,3,4-Trihydroxy-3,7-dimethoxy-6-prenylflavone||5,4-Dihydroxy-3,3-dimethoxy-7-prenyloxyflavone||5,7-Dihydroxy-3,6-dimethoxy-4-prenyloxyflavone||5,7-Dihydroxy-3,8-dimethoxy-4-prenyloxyflavone||5,7-Dihydroxy-3-methoxy-2-[3-methoxy-4-[(3-methyl-2-butenyl)oxy]phenyl]-4H-1-benzopyran-4-one||5-Hydroxy-2-(3-hydroxy-4-methoxyph…	LMPK12050295||LMPK12120356||LMPK12112718||LMPK12112743||LMPK12112853||LMPK12113144||LMPK12112746||LMPK12112760||LMPK12113146||LMPK12110910||LMPK12110911||LMPK12110871||LMPK12090049||LMPK12113079||LMPK12110140||LMPK12112651||LMPK12112650||LMPK12050292	1.19||1.19||1.19||1.19||1.19||1.19||1.19||1.19||1.19||1.19||1.19||1.19||1.19||1.19||1.19||1.19||1.19||1.19
400.342	C23H42O4||C23H42O4||C23H42O4||C23H45NO4||C23H45NO4||C23H45NO4	[M+NH4]+||[M+NH4]+||[M+NH4]+||[M+H]+||[M+H]+||[M+H]+	Persin||methyl 13-butylperoxy-9,11-octadecadienoate||methyl 9-butylperoxy-10,12-octadecadienoate||L-palmitoylcarnitine||O-palmitoylcarnitine||Palmitoylcarnitine	LMFA05000720||LMFA01040037||LMFA01040036||LMFA07070079||LMFA07070098||LMFA07070004	-0.52||-0.52||-0.52||-0.52||-0.52||-0.52
401.172	C21H21NO6	[M+NH4]+	Phyllospadine	LMPK12111158	3.92
403.188	C24H28O4||C24H28O4||C21H29FO5	[M+Na]+||[M+Na]+||[M+Na]+	Chlorophorin||Norbixin||Fludrocortisone	LMPK13090008||LMPR01070209||LMST02030103	-0.14||-0.14||-2.98
408.017	C15H20Br2O2||C15H20Br2O2||C15H20Br2O2||C15H20Br2O2	[M+NH4]+||[M+NH4]+||[M+NH4]+||[M+NH4]+	Thuwalallene C||Thuwalallene E||thuwalenyne A||thuwalenyne B	LMPK02000059||LMPK02000060||LMPK02000062||LMPK02000063	0.71||0.71||0.71||0.71
410.06	C18H17BrO5	[M+NH4]+	3-Bromo-6-hydroxy-2,4,4-trimethoxychalcone	LMPK12120312	1.28
416.209	C23H26O6||C23H26O6	[M+NH4]+||[M+NH4]+	3beta,4beta,5-Trimethoxy-4-hydroxy- (6:7)-2,2-dimethylpyranoflavan||Sphenostylin A	LMPK12020218||LMPK12070119	4.7||4.7
418.001	C16H18Br2O2	[M+NH4]+	14,16-dibromo-7E,9E,13E,15Z-hexadecatetraen-5-ynoic acid	LMFA01090115	-1.57
421.111	C20H20O10||C20H20O10||C20H20O10||C20H20O10||C20H20O10||C20H20O10||C20H20O10	[M+H]+||[M+H]+||[M+H]+||[M+H]+||[M+H]+||[M+H]+||[M+H]+	3-Demethyldigicitrin||5,3,5-Trihydroxy-3,6,7,8,4-pentamethoxyflavone||5,4,5-Trihydroxy-3,6,7,8,2-pentamethoxyflavone||5,7,2-Trihydroxy-3,6,8,4,5-pentamethoxyflavone||5,7,3-Trihydroxy-3,6,8,4,5-pentamethoxyflavone||5,7,4-Trihydroxy-3,6,8,2,5-pentamethoxyflavone||5,7,4-Trihydroxy-3,6,8,3,5-pentamethoxyflavone	LMPK12113364||LMPK12113361||LMPK12113381||LMPK12113383||LMPK12113363||LMPK12113382||LMPK12113362	-4.56||-4.56||-4.56||-4.56||-4.56||-4.56||-4.56
426.358	C25H47NO4||C25H47NO4	[M+H]+||[M+H]+	Elaidic carnitine||O-oleoylcarnitine	LMFA07070063||LMFA07070096	-0.33||-0.33
427.449	C28H58O2	[M+H]+	1,28-Octacosanediol	LMFA05000582	-4.17
428.373	C25H49NO4||C25H49NO4	[M+H]+||[M+H]+	Acylcarnitine C18:0||Stearoylcarnitine	LMFA07070051||LMFA07070008	0.1||0.1
441.237	C21H39O6P	[M+Na]+	CPA(18:1(9Z))	LMGP00000056	-0.36
443.093	C20H20O10||C20H20O10||C20H20O10||C20H20O10||C20H20O10||C20H20O10||C20H20O10	[M+Na]+||[M+Na]+||[M+Na]+||[M+Na]+||[M+Na]+||[M+Na]+||[M+Na]+	3-Demethyldigicitrin||5,3,5-Trihydroxy-3,6,7,8,4-pentamethoxyflavone||5,4,5-Trihydroxy-3,6,7,8,2-pentamethoxyflavone||5,7,2-Trihydroxy-3,6,8,4,5-pentamethoxyflavone||5,7,3-Trihydroxy-3,6,8,4,5-pentamethoxyflavone||5,7,4-Trihydroxy-3,6,8,2,5-pentamethoxyflavone||5,7,4-Trihydroxy-3,6,8,3,5-pentamethoxyflavone	LMPK12113364||LMPK12113361||LMPK12113381||LMPK12113383||LMPK12113363||LMPK12113382||LMPK12113362	-4.36||-4.36||-4.36||-4.36||-4.36||-4.36||-4.36
443.253	C21H41O6P||C24H43BrO2||C18H36NO8P	[M+Na]+||[M+H]+||[M+NH4]+	CPA(18:0)||6-bromo-tetracosa-5E,9Z-dienoic acid||PC(5:0/5:0)	LMGP00000055||LMFA01090102||LMGP01011225	-0.07||3.04||3.59
454.425	C28H52O3||C28H52O3||C28H52O3||C28H52O3	[M+NH4]+||[M+NH4]+||[M+NH4]+||[M+NH4]+	(5Z,9Z)-2R-Methoxy-24-methyl-hexacosadienoic acid||(5Z,9Z)-2R-methoxy-25-methyl-hexacosadienoic acid||19-oxo-22Z-octacosenoic acid||Ficulinic acid B	LMFA01080036||LMFA01080035||LMFA01060150||LMFA01060207	-0.62||-0.62||-0.62||-0.62
459.248	C21H41O7P||C21H41O7P||C21H41O7P||C18H36NO9P	[M+Na]+||[M+Na]+||[M+Na]+||[M+NH4]+	PA(0:0/18:1(9Z))||PA(18:1(9Z)/0:0)||lysophosphatidic acid||PS(12:0/0:0)	LMGP10050014||LMGP10050008||LMGP10050045||LMGP03050008	-0.2||-0.2||-0.2||3.32
463.219	C20H32NO8P	[M+NH4]+	PC(6:2(2E,4E)/6:2(2E,4E))	LMGP01011235	-2.28
465.235	C24H43BrO2||C21H36O11	[M+Na]+||[M+H]+	6-bromo-tetracosa-5E,9Z-dienoic acid||glas#3	LMFA01090102||LMFA13040105	1.95||3.73
466.887	C15H17Br3O2	[M+H]+	Katsuurenyne B	LMPK02000056	4.55
467.018	C19H26Br2O2	[M+Na]+	Methyl 18,18-dibromo-17-octadecen-5,7-diynoate	LMFA01090090	-2.55
467.253	C23H41O6P||C26H43BrO2	[M+Na]+||[M+H]+	sn-3-O-(geranylgeranyl)glycerol 1-phosphate||6-Bromo-5E,9Z,13Z,24Z-heptacosatetraenoic acid	LMGP10060002||LMFA01090105	-0.2||2.74
475.149	C29H24O5	[M+Na]+	Chamuvaritin	LMPK12120473	-4.62
478.012	C16H12O12S2||C16H12O12S2	[M+NH4]+||[M+NH4]+	Hispidulin 7,4-disulfate||Luteolin 4-methyl ether 7,3-disulfate	LMPK12111173||LMPK12110827	3.41||3.41
480.308	C23H43O7P||C23H46NO7P||C23H46NO7P||C23H46NO7P||C23H46NO7P||C23H46NO7P||C30H38O4||C30H38O4||C30H38O4	[M+NH4]+||[M+H]+||[M+H]+||[M+H]+||[M+H]+||[M+H]+||[M+NH4]+||[M+NH4]+||[M+NH4]+	PA(20:2(11Z,14Z)/0:0)||PC(15:1(9Z)/0:0)||PE(0:0/18:1(11Z))||PE(0:0/18:1(9Z))||PE(18:1(11Z)/0:0)||PE(18:1(9Z)/0:0)||Helilupolone||Kazinol E||Kazinol Q	LMGP10050027||LMGP01050125||LMGP02050039||LMGP02050040||LMGP02050064||LMGP02050004||LMPK12120593||LMPK12020237||LMPK12020238	0.0||0.0||0.0||0.0||0.0||0.0||-4.93||-4.93||-4.93
482.324	C23H45O7P||C23H48NO7P||C23H48NO7P||C23H48NO7P||C23H48NO7P	[M+NH4]+||[M+H]+||[M+H]+||[M+H]+||[M+H]+	PA(20:1(11Z)/0:0)||1-(2-methoxy-6Z-heptadecenyl)-sn-glycero-3-phosphoethanolamine||PC(15:0/0:0)||PE(0:0/18:0)||PE(18:0/0:0)	LMGP10050026||LMGP02060019||LMGP01050016||LMGP02050038||LMGP02050001	-0.06||-0.07||-0.07||-0.07||-0.07
485.067	C20H32Br2O2||C21H18O12||C21H18O12||C21H18O12||C21H18O12||C21H18O12||C21H18O12||C21H18O12||C21H18O12||C21H18O12||C21H18O12||C21H18O12||C21H18O12||C21H18O12||C21H18O12||C21H18O12	[M+Na]+||[M+Na]+||[M+Na]+||[M+Na]+||[M+Na]+||[M+Na]+||[M+Na]+||[M+Na]+||[M+Na]+||[M+Na]+||[M+Na]+||[M+Na]+||[M+Na]+||[M+Na]+||[M+Na]+||[M+Na]+	Iriediol||5,6,7,2-Tetrahydroxyflavone 7-glucuronide||5,7,8,2-Tetrahydroxyflavone 7-glucuronide||Aureusidin 6-glucuronide||Demethylwedelolactone 3-O-glucoside||Isoscutellarein 8-glucuronide||Kaempferol 3-glucuronide||Kaempferol 5-glucuronide||Kaempferol 7-glucuronide||Luteolin 3-galacturonide||Luteolin 3-glucuronide||Luteolin 5-glucuronide||Luteolin 7-galacturonide||Luteolin 7-glucuronide||Scutell…	LMPR0104520001||LMPK12111077||LMPK12111295||LMPK12130035||LMPK12090040||LMPK12111341||LMPK12111843||LMPK12111905||LMPK12111852||LMPK12110651||LMPK12110650||LMPK12110639||LMPK12110645||LMPK12110644||LMPK12111105||LMPK12111110	1.12||-4.9||-4.9||-4.9||-4.9||-4.9||-4.9||-4.9||-4.9||-4.9||-4.9||-4.9||-4.9||-4.9||-4.9||-4.9
485.26	C20H38NO9P	[M+NH4]+	PS(14:1(9Z)/0:0)	LMGP03050032	-3.63
488.411	C31H50O3||C31H50O3||C31H50O3	[M+NH4]+||[M+NH4]+||[M+NH4]+	(10E)-19-(3-carboxylpropyl)vitamin D3 / (10E)-19-(3-carboxylpropyl)cholecalciferol||(5E,10E)-19-(3-carboxylpropyl)vitamin D3 / (5E,10E)-19-(3-carboxylpropyl)cholecalciferol||Japonicumins A	LMST03020493||LMST03020494||LMPR0106230001	3.0||3.0||3.0
489.115	C25H22O9||C25H22O9||C25H22O9||C25H22O9||C25H22O9	[M+Na]+||[M+Na]+||[M+Na]+||[M+Na]+||[M+Na]+	Neosilyhermin A||Neosilyhermin B||Silandrin||Silyhermin||Silymonin	LMPK12140416||LMPK12140417||LMPK12140414||LMPK12140415||LMPK12140696	-2.09||-2.09||-2.09||-2.09||-2.09
489.319	C27H46O6||C27H46O6||C27H46O6||C27H46O6||C27H46O6||C27H46O6||C27H46O6||C27H46O6||C27H46O6||C27H46O6||C27H46O6||C27H46O6||C27H46O6||C27H46O6||C27H46O6||C27H46O6||C27H46O6||C27H46O6||C27H46O6||C27H46O6||C27H46O6||C27H46O6	[M+Na]+||[M+Na]+||[M+Na]+||[M+Na]+||[M+Na]+||[M+Na]+||[M+Na]+||[M+Na]+||[M+Na]+||[M+Na]+||[M+Na]+||[M+Na]+||[M+Na]+||[M+Na]+||[M+Na]+||[M+Na]+||[M+Na]+||[M+Na]+||[M+Na]+||[M+Na]+||[M+Na]+||[M+Na]+	(25R)-1beta,3alpha,7alpha,12alpha-tetrahydroxy-5beta-cholestan-26-oic acid||(25R)-3alpha,7alpha,12alpha,24R-tetrahydroxy-5beta-cholestan-26-oic acid||(25R)-3alpha,7alpha,12alpha,24S-tetrahydroxy-5beta-cholestan-26-oic acid||(25S)-2beta,3alpha,7alpha,12alpha-tetrahydroxy-5beta-cholestan-26-oic acid||(25S)-3alpha,7alpha,12alpha,24R-tetrahydroxy-5beta-cholestan-26-oic acid||(25S)-3alpha,7alpha,12alp…	LMST04030189||LMST04030195||LMST04030197||LMST04030190||LMST04030194||LMST04030196||LMST04030047||LMST04030042||LMST04030071||LMST04030210||LMST04030043||LMST04030193||LMST04030045||LMST04030044||LMST04030073||LMST04030198||LMST04030185||LMST04030207||LMST04030208||LMST04030209||LMST04030184||LMST04030067	-0.05||-0.05||-0.05||-0.05||-0.05||-0.05||-0.05||-0.05||-0.05||-0.05||-0.05||-0.05||-0.05||-0.05||-0.05||-0.05||-0.05||-0.05||-0.05||-0.05||-0.05||-0.05
490.244	C26H32O8	[M+NH4]+	16beta-hydroxy-melianthugenin	LMST01130054	0.69
492.39	C26H50O7	[M+NH4]+	bhos#36	LMFA13040059	0.79
496.303	C30H38O5	[M+NH4]+	3-Geranyl-4,2,4,6-tetrahydroxy-5-prenyldihydrochalcone	LMPK12120523	-4.6
498.124	C21H20O13||C21H20O13||C21H20O13||C21H20O13||C21H20O13||C21H20O13||C21H20O13||C21H20O13||C21H20O13||C21H20O13||C21H20O13||C21H20O13||C21H20O13||C21H20O13||C21H20O13	[M+NH4]+||[M+NH4]+||[M+NH4]+||[M+NH4]+||[M+NH4]+||[M+NH4]+||[M+NH4]+||[M+NH4]+||[M+NH4]+||[M+NH4]+||[M+NH4]+||[M+NH4]+||[M+NH4]+||[M+NH4]+||[M+NH4]+	3,5,7,2,3,4-Hexahydroxyflavone 3-glucoside||6-Hydroxytricetin 5-glucoside||Gossypetin 3-galactoside||Gossypetin 3-glucoside||Gossypetin 7-glucoside||Gossypetin 8-glucoside||Myricetin 3-galactoside||Myricetin 3-glucoside||Myricetin 3-glucoside||Myricetin 7-glucoside||Quercetagetin 6-glucoside||Quercetagetin 7-glucoside||Tagetiin||Telephioidin||Zeravschanoside	LMPK12112510||LMPK12111261||LMPK12113174||LMPK12113180||LMPK12113196||LMPK12113198||LMPK12112412||LMPK12112420||LMPK12112440||LMPK12112438||LMPK12112956||LMPK12112906||LMPK12112890||LMPK12110116||LMPK12111467	-0.35||-0.35||-0.35||-0.35||-0.35||-0.35||-0.35||-0.35||-0.35||-0.35||-0.35||-0.35||-0.35||-0.35||-0.35
501.283	C29H40O7	[M+H]+	catechin 3-tetradecanoate	LMPK12020289	-3.94
502.329	C24H50NO6P||C24H50NO6P||C24H50NO6P||C24H50NO6P	[M+Na]+||[M+Na]+||[M+Na]+||[M+Na]+	PC(O-16:1(11Z)/0:0)||PC(O-16:1(9E)/0:0)||PC(O-16:1(9Z)/0:0)||PC(P-16:0/0:0)	LMGP01060028||LMGP01060029||LMGP01060031||LMGP01070006	4.4||4.4||4.4||4.4
503.334	C28H48O6||C28H48O6||C28H48O6||C30H46O6||C30H46O6||C30H46O6||C30H46O6	[M+Na]+||[M+Na]+||[M+Na]+||[M+H]+||[M+H]+||[M+H]+||[M+H]+	24-epi-brassinolide||3alpha,7alpha,12alpha,24-tetrahydroxy-24-methyl-5beta-cholestan-26-oic acid||Brassinolide||16alpha-hydroxygypsogenic acidid||3beta,19alpha,23-trihydroxy-6-oxo-olean-12-en-28-oic acid||3beta,6beta,19alpha-trihydroxy-23-oxo-urs-12-en-28-oic acid||Medicagenic acid	LMST01140002||LMST04040001||LMST01140001||LMPR0106150017||LMPR0106150040||LMPR0106180022||LMPR0106150034	-0.11||-0.11||-0.11||-4.89||-4.89||-4.89||-4.89
504.345	C24H52NO6P	[M+Na]+	PC(O-16:0/0:0)	LMGP01060010	4.29
506.311	C28H40O7	[M+NH4]+	Hydrocortisone butyrate propionate	LMST02030128	-0.66
506.36	C26H52NO6P||C26H52NO6P	[M+H]+||[M+H]+	CerP(d18:1/8:0)||PC(P-18:1(9Z)/0:0)	LMSP02050012||LMGP01070012	-0.06||-0.06
512.979	C17H14O13S2||C17H14O13S2	[M+Na]+||[M+Na]+	6-Hydroxyluteolin 6,3-dimethyl ether 7,4-disulfate||Ombuin 3,3-di-O-sulfate	LMPK12111259||LMPK12112654	4.73||4.73
513.139	C24H26O11||C24H26O11||C24H26O11||C24H26O11||C24H26O11||C24H26O11||C24H26O11||C24H26O11||C24H26O11||C24H26O11	[M+Na]+||[M+Na]+||[M+Na]+||[M+Na]+||[M+Na]+||[M+Na]+||[M+Na]+||[M+Na]+||[M+Na]+||[M+Na]+	5-Hydroxy-7,8,2-trimethoxyflavone 5-glucoside||5-Methoxyafrormosin 7-O-glucoside||6-Hydroxykaempferol 3,6-dimethyl ether 7-glucoside||6-Hydroxyluteolin 6,7-dimethyl ether 4-glucoside||7-Hydroxy-2,4,5-trimethoxyisoflavone 7-O-glucoside||Cladrastin 7-O-glucoside||Isoorientin 7,3,4-trimethyl ether||Lethedoside A||Quercetin 7,3,4-trimethyl ether 3-rhamnoside||Scutellarein 6,7,4-trimethyl ether 5-gluc…	LMPK12111292||LMPK12050378||LMPK12112838||LMPK12111201||LMPK12050064||LMPK12050108||LMPK12111058||LMPK12111061||LMPK12112656||LMPK12111131	4.45||4.45||4.45||4.45||4.45||4.45||4.45||4.45||4.45||4.45
513.292	C22H42NO9P	[M+NH4]+	PS(16:1(9Z)/0:0)	LMGP03050010	-3.06
514.459	C34H56O2	[M+NH4]+	34:6(16Z,19Z,22Z,25Z,28Z,31Z)	LMFA01030842	-4.84
518.311	C29H40O7	[M+NH4]+	catechin 3-tetradecanoate	LMPK12020289	0
520.22	C26H30O10	[M+NH4]+	Phellodensin F	LMPK12140229	4.53
520.254	C27H34O9	[M+NH4]+	Geranioloxyalatum flavone	LMPK12112977	0.16
521.034	C20H18O13S	[M+Na]+	Kaempferol 3-sulfate-7-alpha-arabinopyranoside	LMPK12111975	-4.85
529.249	C27H36F6O2	[M+Na]+	(22E)-26,26,26,27,27,27-hexafluoro-25-hydroxy-22,23-didehydrovitamin D3 / (22E)-26,26,26,27,27,27-hexafluoro-25-hydroxy-22,23-didehydrocholecalciferol	LMST03020081	-3.29
535.17	C25H33ClO9	[M+Na]+	10S,11R-epoxy-punaglandin 3	LMFA03120039	-0.12
537.231	C22H45ClO8S2||C27H36O11	[M+H]+||[M+H]+	13-chloro-docosane-1,14-disulfate||Aldosterone 18-glucuronide	LMFA00000017||LMST05010062	-1.66||-4.13
542.491	C36H60O2||C36H60O2||C36H60O2||C36H60O2	[M+NH4]+||[M+NH4]+||[M+NH4]+||[M+NH4]+	11-cis-retinyl palmitate||36:6(18Z,21Z,24Z,27Z,30Z,33Z)||Linolenyl linolenate||all-trans-retinyl Palmitate	LMPR01090052||LMFA01030843||LMFA07010141||LMPR01090013	-4.22||-4.22||-4.22||-4.22
561.281	C27H45O10P	[M+H]+	20-hydroxyecdysone 22-phosphate	LMST01010185	-2.86
571.431	C34H60O5||C34H60O5	[M+Na]+||[M+Na]+	DG(13:0/18:3(9Z,12Z,15Z)/0:0)[iso2]||DG(14:1(9Z)/17:2(9Z,12Z)/0:0)[iso2]	LMGL02010362||LMGL02010406	-3.74||-3.74
575.481	C40H62O2||C38H64O2||C38H64O2||C38H64O2	[M+H]+||[M+Na]+||[M+Na]+||[M+Na]+	Dihydroxyneurosporene/ OH-Chloroxanthin||38:6(20Z,23Z,26Z,29Z,32Z,35Z)||Linoleyl arachidonate||all-trans-retinyl stearate	LMPR01070212||LMFA01030844||LMFA07010160||LMPR01090014	-1.36||2.82||2.82||2.82
575.503	C37H66O4||C35H68O4||C35H68O4||C35H68O4||C35H68O4||C35H68O4	[M+H]+||[M+Na]+||[M+Na]+||[M+Na]+||[M+Na]+||[M+Na]+	Mayolene-19||FAHFA(17:0/10-O-18:0)||FAHFA(17:0/5-O-18:0)||FAHFA(17:0/7-O-18:0)||FAHFA(17:0/8-O-18:0)||FAHFA(17:0/9-O-18:0)	LMFA07090152||LMFA07090086||LMFA07090090||LMFA07090089||LMFA07090088||LMFA07090087	-0.27||3.91||3.91||3.91||3.91||3.91
576.317	C24H47O12P	[M+NH4]+	PI(15:0/0:0)	LMGP06050030	3.93
577.519	C37H68O4	[M+H]+	phenolic phthiocerol	LMFA05000691	-0.29
591.33	C29H51O10P||C34H48O7||C34H48O7	[M+H]+||[M+Na]+||[M+Na]+	OHOOA-PA||(-)-Helvolic acid||Karatavigenin B	LMGP20070031||LMPR0106040002||LMST01080012	0.81||0.87||0.87
595.47	C37H64O4	[M+Na]+	Annopurpuricin E	LMPK03000040	0.03
596.319	C27H47O11P||C27H50NO11P	[M+NH4]+||[M+H]+	PKODiA-PA||POV-PS	LMGP20070008||LMGP20040015	-0.16||-0.16
597.485	C37H66O4	[M+Na]+	Mayolene-19	LMFA07090152	-0.07
598.299	C26H48NO12P	[M+H]+	PS-PS	LMGP20040018	-0.21
599.501	C37H68O4	[M+Na]+	phenolic phthiocerol	LMFA05000691	-0.29
601.423	C40H56O4||C40H56O4||C40H56O4||C40H56O4||C40H56O4||C40H56O4||C40H56O4||C40H56O4||C40H56O4||C40H56O4||C40H56O4||C40H56O4||C40H56O4||C40H56O4||C40H56O4||C40H56O4||C31H63O7P	[M+H]+||[M+H]+||[M+H]+||[M+H]+||[M+H]+||[M+H]+||[M+H]+||[M+H]+||[M+H]+||[M+H]+||[M+H]+||[M+H]+||[M+H]+||[M+H]+||[M+H]+||[M+H]+||[M+Na]+	4-Hydroxymyxol/ 4-OH-myxol/ (Aphanizophyll)||9-cis-Violaxanthin||9-cis-neoxanthin||Capsanthin 3,6-epoxide||Capsorubin||Cucurbitaxanthin B||Cycloviolaxanthin||Luteoxanthin||Nostoxanthin||Oscillol||Prasinoxanthin||Preprasinoxanthin||Salmoxanthin/ Trollixanthin||Siphonaxanthin||Violaxanthin||all-trans-neoxanthin||PA(O-16:0/12:0)	LMPR01070190||LMPR01070284||LMPR01070291||LMPR01070050||LMPR01070048||LMPR01070065||LMPR01070063||LMPR01070301||LMPR01070104||LMPR01070187||LMPR01070200||LMPR01070201||LMPR01070193||LMPR01070158||LMPR01070282||LMPR01070290||LMGP10020002	-3.67||-3.67||-3.67||-3.67||-3.67||-3.67||-3.67||-3.67||-3.67||-3.67||-3.67||-3.67||-3.67||-3.67||-3.67||-3.67||4.27
603.535	C39H70O4||C39H70O4||C39H70O4||C39H70O4||C37H72O4	[M+H]+||[M+H]+||[M+H]+||[M+H]+||[M+Na]+	1-(14-methyl-pentadecanoyl)-2-(8-[1]-ladderane-octanyl)-sn-glycerol||1-(14-methyl-pentadecanoyl)-2-(8-[3]-ladderane-octanyl)-sn-glycerol||1-(hexadecanoyl)-2-(8-[1]-ladderane-octanyl)-sn-glycerol||1-(hexadecanoyl)-2-(8-[3]-ladderane-octanyl)-sn-glycerol||DG(O-16:0/18:1(9Z))	LMGL02070023||LMGL02070004||LMGL02070024||LMGL02070011||LMGL02020001	-0.11||-0.11||-0.11||-0.11||3.87
604.603	C40H74O2||C40H74O2||C40H74O2	[M+NH4]+||[M+NH4]+||[M+NH4]+	Behenyl linolenate||Gondoyl-linoleate||Linolenyl behenate	LMFA07010168||LMFA07010685||LMFA07010169	0.84||0.84||0.84
606.911	C17H12O17S3	[M+Na]+	Quercetin 3-acetate 7,3,4-tri-O-sulfate	LMPK12112312	-2.55
607.361	C30H55O10P||C35H52O7	[M+H]+||[M+Na]+	OA-PA||catechin 3-eicosanoate	LMGP20070024||LMPK12020291	1.47||1.53
608.089	C17H27N3O17P2	[M+H]+	UDP-GlcNAc	LMSL01010002	-0.12
608.597	C39H77NO3||C39H77NO3||C39H77NO3	[M+H]+||[M+H]+||[M+H]+	Cer(d15:1/24:0)||Cer(d16:1/23:0)||Cer(d18:1/21:0)	LMSP02010045||LMSP02010017||LMSP02010121	-0.49||-0.49||-0.49
610.54	C37H68O5||C37H68O5||C37H68O5||C37H68O5||C37H68O5||C37H68O5||C37H68O5||C37H68O5	[M+NH4]+||[M+NH4]+||[M+NH4]+||[M+NH4]+||[M+NH4]+||[M+NH4]+||[M+NH4]+||[M+NH4]+	DG(12:0/22:2(13Z,16Z)/0:0)[iso2]||DG(14:0/20:2(11Z,14Z)/0:0)[iso2]||DG(14:1(9Z)/20:1(11Z)/0:0)[iso2]||DG(16:0/18:2(9Z,12Z)/0:0)[iso2]||DG(16:1(9Z)/18:1(9Z)/0:0)[iso2]||DG(17:0/17:2(9Z,12Z)/0:0)[iso2]||DG(17:1(9Z)/17:1(9Z)/0:0)||Squafosacin G	LMGL02010349||LMGL02010390||LMGL02010413||LMGL02010027||LMGL02010026||LMGL02010022||LMGL02010021||LMPK03000052	-0.2||-0.2||-0.2||-0.2||-0.2||-0.2||-0.2||-0.2
611.501	C38H68O4	[M+Na]+	Mayolene-20	LMFA07090153	-0.25
612.556	C37H70O5||C37H70O5||C37H70O5||C37H70O5||C37H70O5||C37H70O5||C37H70O5||C37H70O5||C37H70O5||C37H70O5||C37H73NO5	[M+NH4]+||[M+NH4]+||[M+NH4]+||[M+NH4]+||[M+NH4]+||[M+NH4]+||[M+NH4]+||[M+NH4]+||[M+NH4]+||[M+NH4]+||[M+H]+	DG(12:0/22:1(11Z)/0:0)[iso2]||DG(14:0/20:1(11Z)/0:0)[iso2]||DG(14:1(9Z)/20:0/0:0)[iso2]||DG(15:1(9Z)/19:0/0:0)[iso2]||DG(16:0/18:1(11Z)/0:0)||DG(16:0/18:1(9Z)/0:0)||DG(16:1(9Z)/18:0/0:0)[iso2]||DG(17:0/17:1(9Z)/0:0)[iso2]||DG(18:1(11E)/16:0/0:0)||DG(18:1(9Z)/16:0/0:0)||Cer(t18:1(6OH)/19:0(2OH))	LMGL02010348||LMGL02010389||LMGL02010412||LMGL02010459||LMGL02010307||LMGL02010006||LMGL02010023||LMGL02010018||LMGL02010004||LMGL02010005||LMSP02010190	-0.41||-0.41||-0.41||-0.41||-0.41||-0.41||-0.41||-0.41||-0.41||-0.41||-0.41
615.496	C37H68O5||C37H68O5||C37H68O5||C37H68O5||C37H68O5||C37H68O5||C37H68O5||C37H68O5||C39H66O5||C39H66O5||C39H66O5||C39H66O5||C39H66O5||C39H66O5||C39H66O5	[M+Na]+||[M+Na]+||[M+Na]+||[M+Na]+||[M+Na]+||[M+Na]+||[M+Na]+||[M+Na]+||[M+H]+||[M+H]+||[M+H]+||[M+H]+||[M+H]+||[M+H]+||[M+H]+	DG(12:0/22:2(13Z,16Z)/0:0)[iso2]||DG(14:0/20:2(11Z,14Z)/0:0)[iso2]||DG(14:1(9Z)/20:1(11Z)/0:0)[iso2]||DG(16:0/18:2(9Z,12Z)/0:0)[iso2]||DG(16:1(9Z)/18:1(9Z)/0:0)[iso2]||DG(17:0/17:2(9Z,12Z)/0:0)[iso2]||DG(17:1(9Z)/17:1(9Z)/0:0)||Squafosacin G||DG(14:0/22:5(7Z,10Z,13Z,16Z,19Z)/0:0)[iso2]||DG(14:1(9Z)/22:4(7Z,10Z,13Z,16Z)/0:0)[iso2]||DG(16:0/20:5(5Z,8Z,11Z,14Z,17Z)/0:0)[iso2]||DG(16:1(9Z)/20:4(5Z,8Z…	LMGL02010349||LMGL02010390||LMGL02010413||LMGL02010027||LMGL02010026||LMGL02010022||LMGL02010021||LMPK03000052||LMGL02010400||LMGL02010423||LMGL02010078||LMGL02010077||LMGL02010071||LMGL02010481||LMGL02010504	-0.14||-0.14||-0.14||-0.14||-0.14||-0.14||-0.14||-0.14||-4.04||-4.04||-4.04||-4.04||-4.04||-4.04||-4.04
619.469	C34H67O7P||C34H67O7P||C34H67O7P	[M+H]+||[M+H]+||[M+H]+	PA(O-16:0/15:1(9Z))||PA(P-16:0/15:0)||PA(P-18:0/13:0)	LMGP10020007||LMGP10030005||LMGP10030029	-0.37||-0.37||-0.37
621.485	C34H69O7P||C34H69O7P||C33H65NO6S||C41H64O4||C41H64O4||C41H64O4||C41H64O4	[M+H]+||[M+H]+||[M+NH4]+||[M+H]+||[M+H]+||[M+H]+||[M+H]+	PA(O-16:0/15:0)||PA(O-18:0/13:0)||Sulfobacin SL3||1-(6-[1]-ladderane-hexanoyl)-2-(8-[1]-ladderane-octanyl)-sn-glycerol||1-(6-[1]-ladderane-hexanoyl)-2-(8-[3]-ladderane-octanyl)-sn-glycerol||1-(6-[5]-ladderane-hexanoyl)-2-(8-[1]-ladderane-octanyl)-sn-glycerol||1-(6-[5]-ladderane-hexanoyl)-2-(8-[3]-ladderane-octanyl)-sn-glycerol	LMGP10020006||LMGP10020020||LMSP00000021||LMGL02070028||LMGL02070016||LMGL02070027||LMGL02070007	-0.25||-0.25||-3.01||-4.06||-4.06||-4.06||-4.06
623.501	C41H66O4	[M+H]+	1-(6-[3]-ladderane-hexanoyl)-2-(8-[3]-ladderane-octanyl)-sn-glycerol	LMGL02070015	-4.1
625.516	C39H70O4||C39H70O4||C39H70O4||C39H70O4	[M+Na]+||[M+Na]+||[M+Na]+||[M+Na]+	1-(14-methyl-pentadecanoyl)-2-(8-[1]-ladderane-octanyl)-sn-glycerol||1-(14-methyl-pentadecanoyl)-2-(8-[3]-ladderane-octanyl)-sn-glycerol||1-(hexadecanoyl)-2-(8-[1]-ladderane-octanyl)-sn-glycerol||1-(hexadecanoyl)-2-(8-[3]-ladderane-octanyl)-sn-glycerol	LMGL02070023||LMGL02070004||LMGL02070024||LMGL02070011	-0.36||-0.36||-0.36||-0.36
630.071	C17H27N3O17P2	[M+Na]+	UDP-GlcNAc	LMSL01010002	-0.26
633.485	C35H69O7P||C35H69O7P||C35H69O7P||C35H69O7P||C35H69O7P||C37H64N2O6	[M+H]+||[M+H]+||[M+H]+||[M+H]+||[M+H]+||[M+H]+	PA(O-16:0/16:1(9Z))||PA(O-18:0/14:1(9Z))||PA(P-16:0/16:0)||PA(P-18:0/14:0)||PA(P-20:0/12:0)||bacteriohopane-32,33-diol-34,35-dicarbamate	LMGP10020008||LMGP10020022||LMGP10030007||LMGP10030030||LMGP10030056||LMPR04000013	-0.06||-0.06||-0.06||-0.06||-0.06||2.55
634.374	C31H56NO10P||C31H56NO10P	[M+H]+||[M+H]+	OHOOA-PE||PKOHA-PC	LMGP20020046||LMGP20010011	3.44||3.44
634.446	C40H56O5||C40H56O5||C33H64NO8P||C33H64NO8P||C33H64NO8P||C33H64NO8P||C33H64NO8P||C33H64NO8P||C33H61O8P||C33H61O8P||C33H61O8P||C33H61O8P||C33H61O8P||C33H61O8P||C33H61O8P	[M+NH4]+||[M+NH4]+||[M+H]+||[M+H]+||[M+H]+||[M+H]+||[M+H]+||[M+H]+||[M+NH4]+||[M+NH4]+||[M+NH4]+||[M+NH4]+||[M+NH4]+||[M+NH4]+||[M+NH4]+	6-Hydroxysiphonaxanthin||Fucoxanthinol||PE(12:0/16:1(9Z))||PE(13:0/15:1(9Z))||PE(14:0/14:1(9Z))||PE(14:1(9Z)/14:0)||PE(15:1(9Z)/13:0)||PE(16:1(9Z)/12:0)||PA(12:0/18:2(9Z,12Z))||PA(13:0/17:2(9Z,12Z))||PA(14:1(9Z)/16:1(9Z))||PA(15:1(9Z)/15:1(9Z))||PA(16:1(9Z)/14:1(9Z))||PA(17:2(9Z,12Z)/13:0)||PA(18:2(9Z,12Z)/12:0)	LMPR01070204||LMPR01070055||LMGP02010362||LMGP02010384||LMGP02010407||LMGP02010424||LMGP02010475||LMGP02010514||LMGP10010051||LMGP10010073||LMGP10010113||LMGP10010164||LMGP10010202||LMGP10010277||LMGP10010338	-0.53||-0.53||3.2||3.2||3.2||3.2||3.2||3.2||3.2||3.2||3.2||3.2||3.2||3.2||3.2
636.556	C39H70O5||C39H70O5||C39H70O5||C39H70O5||C39H70O5||C39H70O5||C39H70O5||C39H70O5||C37H75NO5||C37H75NO5	[M+NH4]+||[M+NH4]+||[M+NH4]+||[M+NH4]+||[M+NH4]+||[M+NH4]+||[M+NH4]+||[M+NH4]+||[M+Na]+||[M+Na]+	DG(14:0/22:3(10Z,13Z,16Z)/0:0)[iso2]||DG(14:1(9Z)/22:2(13Z,16Z)/0:0)[iso2]||DG(16:0/20:3(8Z,11Z,14Z)/0:0)[iso2]||DG(16:1(9Z)/20:2(11Z,14Z)/0:0)[iso2]||DG(18:0/18:3(9Z,12Z,15Z)/0:0)[iso2]||DG(18:1(9Z)/18:2(9Z,12Z)/0:0)[iso2]||DG(18:3(6Z,9Z,12Z)/18:0/0:0)[iso2]||DG(19:1(9Z)/17:2(9Z,12Z)/0:0)[iso2]||Cer(t15:0(14Me)/21:0(2OH[R]))||Cer(t18:0/19:0(2OH))	LMGL02010398||LMGL02010421||LMGL02010062||LMGL02010061||LMGL02010057||LMGL02010056||LMGL02010479||LMGL02010526||LMSP02030033||LMSP02030065	0.08||0.08||0.08||0.08||0.08||0.08||0.08||0.08||3.86||3.86
639.496	C39H68O5||C39H68O5||C39H68O5||C39H68O5||C39H68O5||C39H68O5||C39H68O5||C39H68O5||C41H66O5||C41H66O5||C41H66O5||C41H66O5||C41H66O5	[M+Na]+||[M+Na]+||[M+Na]+||[M+Na]+||[M+Na]+||[M+Na]+||[M+Na]+||[M+Na]+||[M+H]+||[M+H]+||[M+H]+||[M+H]+||[M+H]+	DG(14:0/22:4(7Z,10Z,13Z,16Z)/0:0)[iso2]||DG(14:1(9Z)/22:3(10Z,13Z,16Z)/0:0)[iso2]||DG(16:0/20:4(5Z,8Z,11Z,14Z)/0:0)[iso2]||DG(16:1(9Z)/20:3(8Z,11Z,14Z)/0:0)[iso2]||DG(18:1(9Z)/18:3(9Z,12Z,15Z)/0:0)[iso2]||DG(18:2(9Z,12Z)/18:2(9Z,12Z)/0:0)||DG(18:3(6Z,9Z,12Z)/18:1(9Z)/0:0)[iso2]||DG(18:4(6Z,9Z,12Z,15Z)/18:0/0:0)[iso2]||DG(16:1(9Z)/22:6(4Z,7Z,10Z,13Z,16Z,19Z)/0:0)[iso2]||DG(18:2(9Z,12Z)/20:5(5Z,8Z,…	LMGL02010399||LMGL02010422||LMGL02010070||LMGL02010069||LMGL02010064||LMGL02010063||LMGL02010480||LMGL02010503||LMGL02010174||LMGL02010143||LMGL02010488||LMGL02010142||LMGL02010511	-0.49||-0.49||-0.49||-0.49||-0.49||-0.49||-0.49||-0.49||-4.25||-4.25||-4.25||-4.25||-4.25
640.309	C35H45NO10	[M+H]+	Protorifamycin I	LMPK05000007	-3.98
640.515	C37H66O7||C37H66O7||C37H66O7||C37H66O7||C37H66O7||C37H66O7||C37H66O7||C37H66O7||C37H66O7||C37H66O7||C37H66O7||C37H66O7||C37H66O7||C37H66O7||C37H66O7||C37H66O7||C37H66O7||C37H66O7	[M+NH4]+||[M+NH4]+||[M+NH4]+||[M+NH4]+||[M+NH4]+||[M+NH4]+||[M+NH4]+||[M+NH4]+||[M+NH4]+||[M+NH4]+||[M+NH4]+||[M+NH4]+||[M+NH4]+||[M+NH4]+||[M+NH4]+||[M+NH4]+||[M+NH4]+||[M+NH4]+	Annopurpuricin A||Annopurpuricin B||Annopurpuricin D||Annosquacin C||Annosquacin-I||Annosquatin V||Bullatacinone||Montalicin E||Muricenin||Rolliniastatin-1||Rolliniastatin-2||Squamocin||Squamocin-II||Squamocin-III||Squamocin-IV||Squamostanin-D||Squamotin A||Squamoxinone-E	LMPK03000036||LMPK03000037||LMPK03000039||LMPK03000045||LMPK03000033||LMPK03000020||LMFA05000646||LMPK03000084||LMPK03000072||LMPK03000010||LMPK03000011||LMPK03000012||LMPK03000027||LMPK03000025||LMPK03000031||LMPK03000064||LMPK03000015||LMPK03000032	-0.26||-0.26||-0.26||-0.26||-0.26||-0.26||-0.26||-0.26||-0.26||-0.26||-0.26||-0.26||-0.26||-0.26||-0.26||-0.26||-0.26||-0.26
641.511	C39H70O5||C39H70O5||C39H70O5||C39H70O5||C39H70O5||C39H70O5||C39H70O5||C39H70O5||C41H68O5||C41H68O5||C41H68O5||C41H68O5||C41H68O5||C41H68O5||C41H68O5	[M+Na]+||[M+Na]+||[M+Na]+||[M+Na]+||[M+Na]+||[M+Na]+||[M+Na]+||[M+Na]+||[M+H]+||[M+H]+||[M+H]+||[M+H]+||[M+H]+||[M+H]+||[M+H]+	DG(14:0/22:3(10Z,13Z,16Z)/0:0)[iso2]||DG(14:1(9Z)/22:2(13Z,16Z)/0:0)[iso2]||DG(16:0/20:3(8Z,11Z,14Z)/0:0)[iso2]||DG(16:1(9Z)/20:2(11Z,14Z)/0:0)[iso2]||DG(18:0/18:3(9Z,12Z,15Z)/0:0)[iso2]||DG(18:1(9Z)/18:2(9Z,12Z)/0:0)[iso2]||DG(18:3(6Z,9Z,12Z)/18:0/0:0)[iso2]||DG(19:1(9Z)/17:2(9Z,12Z)/0:0)[iso2]||DG(16:0/22:6(4Z,7Z,10Z,13Z,16Z,19Z)/0:0)[iso2]||DG(16:1(9Z)/22:5(7Z,10Z,13Z,16Z,19Z)/0:0)[iso2]||DG(1…	LMGL02010398||LMGL02010421||LMGL02010062||LMGL02010061||LMGL02010057||LMGL02010056||LMGL02010479||LMGL02010526||LMGL02010162||LMGL02010161||LMGL02010132||LMGL02010131||LMGL02010487||LMGL02010130||LMGL02010510	-0.13||-0.13||-0.13||-0.13||-0.13||-0.13||-0.13||-0.13||-3.88||-3.88||-3.88||-3.88||-3.88||-3.88||-3.88
642.241	C29H36O15||C29H36O15||C29H36O15	[M+NH4]+||[M+NH4]+||[M+NH4]+	3,4,6-Trihydroxy-4,2-dimethoxychalcone 4-O-rutinoside||Farrerol 5,7-di-O-glucoside||Homoesperetin 7-rutinoside	LMPK12120304||LMPK12140233||LMPK12140387	3.31||3.31||3.31
642.511	C40H64O5||C40H64O5	[M+NH4]+||[M+NH4]+	DG(15:1(9Z)/22:6(4Z,7Z,10Z,13Z,16Z,19Z)/0:0)[iso2]||DG(17:2(9Z,12Z)/20:5(5Z,8Z,11Z,14Z,17Z)/0:0)[iso2]	LMGL02010473||LMGL02010112	3.1||3.1
643.271	C32H44O12	[M+Na]+	3-O-(beta-D-glucopyranosyl)-3beta,14beta-dihydroxy-16beta-acetoxy-19-oxo-5alpha-bufa-20,22-dienolide	LMST01130037	-1.85
644.509	C36H69NO8||C36H69NO8	[M+H]+||[M+H]+	GlcCer(d14:1/16:0)||GlcCer(d18:1/12:0)	LMSP0501AA39||LMSP0501AA01	-1.28||-1.28
645.485	C41H66O4||C36H69O7P||C36H69O7P||C36H69O7P	[M+Na]+||[M+H]+||[M+H]+||[M+H]+	1-(6-[3]-ladderane-hexanoyl)-2-(8-[3]-ladderane-octanyl)-sn-glycerol||PA(O-16:0/17:2(9Z,12Z))||PA(P-16:0/17:1(9Z))||PA(P-18:0/15:1(9Z))	LMGL02070015||LMGP10020010||LMGP10030010||LMGP10030033	-0.1||-0.16||-0.16||-0.16
647.501	C36H71O7P||C36H71O7P||C36H71O7P||C36H71O7P||C36H71O7P	[M+H]+||[M+H]+||[M+H]+||[M+H]+||[M+H]+	PA(O-16:0/17:1(9Z))||PA(O-18:0/15:1(9Z))||PA(P-16:0/17:0)||PA(P-18:0/15:0)||PA(P-20:0/13:0)	LMGP10020009||LMGP10020024||LMGP10030009||LMGP10030032||LMGP10030057	-0.25||-0.25||-0.25||-0.25||-0.25
649.516	C36H73O7P||C36H73O7P||C36H73O7P||C43H68O4||C43H68O4||C43H68O4||C43H68O4||C43H68O4	[M+H]+||[M+H]+||[M+H]+||[M+H]+||[M+H]+||[M+H]+||[M+H]+||[M+H]+	PA(O-16:0/17:0)||PA(O-18:0/15:0)||PA(O-20:0/13:0)||1-(8-[1]-ladderane-octanoyl)-2-(8-[1]-ladderane-octanyl)-sn-glycerol||1-(8-[1]-ladderane-octanoyl)-2-(8-[3]-ladderane-octanyl)-sn-glycerol||1-(8-[5]-ladderane-octanoyl)-2-(8-[1]-ladderane-octanyl)-sn-glycerol||1-(8-[5]-ladderane-octanoyl)-2-(8-[3]-ladderane-octanyl)-sn-glycerol||1-(8-[5]-ladderane-octanoyl)-2-(8-[3]-ladderane-octanyl)-sn-glycerol	LMGP10020083||LMGP10020023||LMGP10020043||LMGL02070030||LMGL02070017||LMGL02070029||LMGL02070008||LMGL02070019	-0.29||-0.29||-0.29||-3.94||-3.94||-3.94||-3.94||-3.94
650.439	C33H64NO9P||C33H64NO9P||C33H64NO9P	[M+H]+||[M+H]+||[M+H]+	1-(2-methoxy-5Z,19Z-hexacosadienyl)-sn-glycero-3-phosphoserine||1-(2-methoxy-5Z,9Z-hexacosadienyl)-sn-glycero-3-phosphoserine||PON-PC	LMGP03060031||LMGP03060030||LMGP20010008	-0.22||-0.22||-0.22
650.585	C44H72O2||C44H72O2	[M+NH4]+||[M+NH4]+	16:3 Campesterol ester||ergosteryl palmitoleate	LMST01020061||LMST01031011	-3.82||-3.82
651.532	C43H70O4||C43H70O4||C43H70O4||C43H70O4	[M+H]+||[M+H]+||[M+H]+||[M+H]+	1-(8-[1]-ladderane-octanoyl)-2-(8-[1]-ladderane-octanyl)-sn-glycerol||1-(8-[1]-ladderane-octanoyl)-2-(8-[3]-ladderane-octanyl)-sn-glycerol||1-(8-[3]-ladderane-octanoyl)-2-(8-[1]-ladderane-octanyl)-sn-glycerol||1-(8-[3]-ladderane-octanoyl-2-(8-[3]-ladderane-octanyl)-sn-glycerol	LMGL02070031||LMGL02070018||LMGL02070032||LMGL02070009	-4.1||-4.1||-4.1||-4.1
651.626	C42H82O4	[M+H]+	2S,3R-didecanoyl-docosane-2,3-diol	LMFA07020001	-3.27
652.494	C41H62O5||C34H67O8P||C34H67O8P||C34H67O8P||C34H67O8P||C34H67O8P||C34H67O8P||C34H67O8P||C34H67O8P	[M+NH4]+||[M+NH4]+||[M+NH4]+||[M+NH4]+||[M+NH4]+||[M+NH4]+||[M+NH4]+||[M+NH4]+||[M+NH4]+	DG(18:4(6Z,9Z,12Z,15Z)/20:5(5Z,8Z,11Z,14Z,17Z)/0:0)[iso2]||PA(12:0/19:0)||PA(13:0/18:0)||PA(14:0/17:0)||PA(15:0/16:0)||PA(16:0/15:0)||PA(17:0/14:0)||PA(18:0/13:0)||PA(19:0/12:0)	LMGL02010513||LMGP10010055||LMGP10010074||LMGP10010094||LMGP10010919||LMGP10010912||LMGP10010225||LMGP10010306||LMGP10010872	0.73||4.36||4.36||4.36||4.36||4.36||4.36||4.36||4.36
652.6	C44H74O2||C44H74O2||C44H74O2	[M+NH4]+||[M+NH4]+||[M+NH4]+	16:2 Campesterol ester||episteryl palmitoleate||fecosteryl palmitoleate	LMST01020058||LMST01031009||LMST01031013	-3.89||-3.89||-3.89
653.623	C45H80O2||C45H80O2	[M+H]+||[M+H]+	16:0 Sitosterol ester||18:0 Cholesterol ester	LMST01020047||LMST01020007	0.0||0.0
657.485	C37H69O7P||C37H69O7P||C37H69O7P||C35H71O7P||C35H71O7P||C35H71O7P	[M+H]+||[M+H]+||[M+H]+||[M+Na]+||[M+Na]+||[M+Na]+	PA(O-16:0/18:3(6Z,9Z,12Z))||PA(O-16:0/18:3(9Z,12Z,15Z))||PA(P-16:0/18:2(9Z,12Z))||PA(O-16:0/16:0)||PA(O-18:0/14:0)||PA(O-20:0/12:0)	LMGP10020080||LMGP10020079||LMGP10030088||LMGP10020084||LMGP10020021||LMGP10020042	-0.92||-0.92||-0.92||2.74||2.74||2.74
659.139	C32H28O14||C32H28O14||C32H28O14	[M+Na]+||[M+Na]+||[M+Na]+	Kaempferol 3-(2-(E)-p-coumaroyl-6-acetylglucoside)||Kaempferol 3-(3-acetyl-6-p-coumaroylglucoside)||Kaempferol 3-(4-acetyl-6-p-coumarylglucoside)	LMPK12111945||LMPK12111946||LMPK12111793	2.27||2.27||2.27
659.501	C37H71O7P||C37H71O7P||C37H71O7P||C37H71O7P	[M+H]+||[M+H]+||[M+H]+||[M+H]+	PA(O-16:0/18:2(9Z,12Z))||PA(P-16:0/18:1(9Z))||PA(P-18:0/16:1(9Z))||PA(P-20:0/14:1(9Z))	LMGP10020081||LMGP10030089||LMGP10030035||LMGP10030059	-0.09||-0.09||-0.09||-0.09
660.565	C40H73N3O4	[M+H]+	N-ornithinyl-35-aminobacteriohopane-32,33,34-triol	LMPR04000015	-4.03
662.562	C36H73N2O5P	[M+NH4]+	N-palmitoyl-D-sphingosyl-1-(2-aminoethyl)phosphonate	LMSP04000002	3.54
662.572	C41H72O5||C41H72O5||C41H72O5||C41H72O5||C41H72O5||C41H72O5||C41H72O5||C41H72O5||C39H77NO5	[M+NH4]+||[M+NH4]+||[M+NH4]+||[M+NH4]+||[M+NH4]+||[M+NH4]+||[M+NH4]+||[M+NH4]+||[M+Na]+	DG(16:0/22:4(7Z,10Z,13Z,16Z)/0:0)[iso2]||DG(16:1(9Z)/22:3(10Z,13Z,16Z)/0:0)[iso2]||DG(18:0/20:4(5Z,8Z,11Z,14Z)/0:0)[iso2]||DG(18:1(9Z)/20:3(8Z,11Z,14Z)/0:0)[iso2]||DG(18:2(9Z,12Z)/20:2(11Z,14Z)/0:0)[iso2]||DG(18:3(6Z,9Z,12Z)/20:1(11Z)/0:0)[iso2]||DG(18:3(9Z,12Z,15Z)/20:1(11Z)/0:0)[iso2]||DG(18:4(6Z,9Z,12Z,15Z)/20:0/0:0)[iso2]||Cer(t18:1(6OH)/21:0(2OH))	LMGL02010138||LMGL02010126||LMGL02010111||LMGL02010110||LMGL02010109||LMGL02010485||LMGL02010108||LMGL02010508||LMSP02010188	-0.38||-0.38||-0.38||-0.38||-0.38||-0.38||-0.38||-0.38||3.24
667.527	C41H72O5||C41H72O5||C41H72O5||C41H72O5||C41H72O5||C41H72O5||C41H72O5||C41H72O5||C38H70N2O7||C43H70O5||C43H70O5||C43H70O5||C43H70O5||C43H70O5||C43H70O5||C43H70O5	[M+Na]+||[M+Na]+||[M+Na]+||[M+Na]+||[M+Na]+||[M+Na]+||[M+Na]+||[M+Na]+||[M+H]+||[M+H]+||[M+H]+||[M+H]+||[M+H]+||[M+H]+||[M+H]+||[M+H]+	DG(16:0/22:4(7Z,10Z,13Z,16Z)/0:0)[iso2]||DG(16:1(9Z)/22:3(10Z,13Z,16Z)/0:0)[iso2]||DG(18:0/20:4(5Z,8Z,11Z,14Z)/0:0)[iso2]||DG(18:1(9Z)/20:3(8Z,11Z,14Z)/0:0)[iso2]||DG(18:2(9Z,12Z)/20:2(11Z,14Z)/0:0)[iso2]||DG(18:3(6Z,9Z,12Z)/20:1(11Z)/0:0)[iso2]||DG(18:3(9Z,12Z,15Z)/20:1(11Z)/0:0)[iso2]||DG(18:4(6Z,9Z,12Z,15Z)/20:0/0:0)[iso2]||N-(3R-(15-methyl-3-(13-methyl-tetradecanoyloxy)-hexadecanoyl)-glycyl)-…	LMGL02010138||LMGL02010126||LMGL02010111||LMGL02010110||LMGL02010109||LMGL02010485||LMGL02010108||LMGL02010508||LMFA08020224||LMGL02010225||LMGL02010224||LMGL02010495||LMGL02010223||LMGL02010518||LMGL02010198||LMGL02010197	-0.21||-0.21||-0.21||-0.21||-0.21||-0.21||-0.21||-0.21||2.21||-3.82||-3.82||-3.82||-3.82||-3.82||-3.82||-3.82
669.446	C35H67O8P||C35H67O8P||C35H67O8P||C35H67O8P||C35H67O8P||C35H67O8P||C35H67O8P||C35H67O8P||C35H67O8P||C35H67O8P||C35H67O8P||C35H67O8P||C35H67O8P||C35H67O8P||C32H62NO10P||C32H62NO10P||C32H62NO10P||C37H65O8P||C37H65O8P||C37H65O8P||C37H65O8P||C37H65O8P||C37H65O8P||C37H65O8P||C37H65O8P||C37H65O8P||C37H65O8P||C37H65O8P||C37H65O8P||C37H65O8P	[M+Na]+||[M+Na]+||[M+Na]+||[M+Na]+||[M+Na]+||[M+Na]+||[M+Na]+||[M+Na]+||[M+Na]+||[M+Na]+||[M+Na]+||[M+Na]+||[M+Na]+||[M+Na]+||[M+NH4]+||[M+NH4]+||[M+NH4]+||[M+H]+||[M+H]+||[M+H]+||[M+H]+||[M+H]+||[M+H]+||[M+H]+||[M+H]+||[M+H]+||[M+H]+||[M+H]+||[M+H]+||[M+H]+	PA(12:0/20:1(11Z))||PA(13:0/19:1(9Z))||PA(14:0/18:1(9Z))||PA(14:1(9Z)/18:0)||PA(15:0/17:1(9Z))||PA(15:1(9Z)/17:0)||PA(16:0/16:1(9Z))||PA(16:1(9Z)/16:0)||PA(17:0/15:1(9Z))||PA(17:1(9Z)/15:0)||PA(18:0/14:1(9Z))||PA(18:1(9Z)/14:0)||PA(19:1(9Z)/13:0)||PA(20:1(11Z)/12:0)||PS(12:0/14:0)||PS(13:0/13:0)||PS(14:0/12:0)||PA(12:0/22:4(7Z,10Z,13Z,16Z))||PA(14:0/20:4(5Z,8Z,11Z,14Z))||PA(14:1(9Z)/20:3(8Z,11Z,1…	LMGP10010057||LMGP10010080||LMGP10010019||LMGP10010117||LMGP10010141||LMGP10010167||LMGP10010911||LMGP10010205||LMGP10010226||LMGP10010250||LMGP10010307||LMGP10010882||LMGP10010479||LMGP10010526||LMGP03010972||LMGP03010971||LMGP03010931||LMGP10010065||LMGP10010925||LMGP10010128||LMGP10010906||LMGP10010210||LMGP10010211||LMGP10010891||LMGP10010371||LMGP10010401||LMGP10010429||LMGP10010590||LMGP100…	-0.35||-0.35||-0.35||-0.35||-0.35||-0.35||-0.35||-0.35||-0.35||-0.35||-0.35||-0.35||-0.35||-0.35||2.07||2.07||2.07||-3.95||-3.95||-3.95||-3.95||-3.95||-3.95||-3.95||-3.95||-3.95||-3.95||-3.95||-3.95||-3.95
669.69	C42H85NO3||C42H85NO3	[M+NH4]+||[M+NH4]+	Cer(d18:0/24:0)||Cer(d20:0/22:0)	LMSP02020012||LMSP02020026	4.1||4.1
672.314	C30H52NO12P	[M+Na]+	PKOOA-PS	LMGP20040006	3.32
673.516	C43H70O4||C43H70O4||C43H70O4||C43H70O4||C38H73O7P||C38H73O7P||C38H73O7P||C38H73O7P	[M+Na]+||[M+Na]+||[M+Na]+||[M+Na]+||[M+H]+||[M+H]+||[M+H]+||[M+H]+	1-(8-[1]-ladderane-octanoyl)-2-(8-[1]-ladderane-octanyl)-sn-glycerol||1-(8-[1]-ladderane-octanoyl)-2-(8-[3]-ladderane-octanyl)-sn-glycerol||1-(8-[3]-ladderane-octanoyl)-2-(8-[1]-ladderane-octanyl)-sn-glycerol||1-(8-[3]-ladderane-octanoyl-2-(8-[3]-ladderane-octanyl)-sn-glycerol||PA(O-18:0/17:2(9Z,12Z))||PA(P-16:0/19:1(9Z))||PA(P-18:0/17:1(9Z))||PA(P-20:0/15:1(9Z))	LMGL02070031||LMGL02070018||LMGL02070032||LMGL02070009||LMGP10020027||LMGP10030017||LMGP10030037||LMGP10030061	-0.48||-0.48||-0.48||-0.48||-0.54||-0.54||-0.54||-0.54
675.533	C38H75O7P||C38H75O7P||C38H75O7P||C38H75O7P||C38H75O7P||C38H75O7P||C37H71NO6S	[M+H]+||[M+H]+||[M+H]+||[M+H]+||[M+H]+||[M+H]+||[M+NH4]+	PA(O-16:0/19:1(9Z))||PA(O-18:0/17:1(9Z))||PA(O-20:0/15:1(9Z))||PA(P-16:0/19:0)||PA(P-18:0/17:0)||PA(P-20:0/15:0)||(2S,3R,4E,8E)-3-Hydroxy-2-[methyl(stearoyl)amino]-4,8-octadecadien-1-yl hydrogen sulfate	LMGP10020012||LMGP10020026||LMGP10020047||LMGP10030016||LMGP10030036||LMGP10030060||LMSP00000025	0.65||0.65||0.65||0.65||0.65||0.65||-1.88
675.543	C37H75N2O6P||C37H75N2O6P||C37H75N2O6P||C37H75N2O6P||C37H75N2O6P||C38H74O9||C38H74O9	[M+H]+||[M+H]+||[M+H]+||[M+H]+||[M+H]+||[M+H]+||[M+H]+	PE-Cer(d14:1(4E)/21:0)||PE-Cer(d15:1(4E)/20:0)||PE-Cer(d16:1(4E)/19:0)||SM(d16:1/16:0)||SM(d18:1/14:0)||1-(O-alpha-D-glucopyranosyl)-29-keto-(1,3R,31R)-dotriacontanetriol||1-(O-alpha-D-mannopyranosyl)-29-keto-(1,3R,31R)-dotriacontanetriol	LMSP03020007||LMSP03020016||LMSP03020021||LMSP03010035||LMSP03010028||LMFA13010030||LMFA13010031	-0.33||-0.33||-0.33||-0.33||-0.33||4.1||4.1
678.218	C35H32O13||C35H32O13	[M+NH4]+||[M+NH4]+	Isophylloflavanine||Phylloflavanine	LMPK12020080||LMPK12020081	-0.14||-0.14
682.356	C31H53O13P	[M+NH4]+	OKHdiA-PG	LMGP20060026	0
683.501	C39H71O7P||C39H71O7P||C39H71O7P||C39H71O7P||C39H71O7P||C37H73O7P||C37H73O7P||C37H73O7P||C37H73O7P||C37H73O7P||C37H73O7P	[M+H]+||[M+H]+||[M+H]+||[M+H]+||[M+H]+||[M+Na]+||[M+Na]+||[M+Na]+||[M+Na]+||[M+Na]+||[M+Na]+	PA(O-16:0/20:4(5Z,8Z,11Z,14Z))||PA(O-18:0/18:4(6Z,9Z,12Z,15Z))||PA(P-16:0/20:3(8Z,11Z,14Z))||PA(P-18:0/18:3(6Z,9Z,12Z))||PA(P-18:0/18:3(9Z,12Z,15Z))||PA(O-16:0/18:1(9Z))||PA(O-18:0/16:1(9Z))||PA(O-20:0/14:1(9Z))||PA(P-16:0/18:0)||PA(P-18:0/16:0)||PA(P-20:0/14:0)	LMGP10020092||LMGP10020032||LMGP10030021||LMGP10030041||LMGP10030042||LMGP10020094||LMGP10020074||LMGP10020045||LMGP10030012||LMGP10030034||LMGP10030058	-0.36||-0.36||-0.36||-0.36||-0.36||3.15||3.15||3.15||3.15||3.15||3.15
686.606	C42H81NO4||C42H81NO4	[M+Na]+||[M+Na]+	Cer(d18:2/24:0(2OH))||GlcCer(d18:2(4E,8Z)/24:0(2OH[R]))	LMSP02020063||LMSP05010056	0.59||0.59
688.603	C47H74O2	[M+NH4]+	20:5 Cholesterol ester	LMST01020015	0.8
689.559	C38H77N2O6P||C38H77N2O6P||C38H77N2O6P||C38H77N2O6P	[M+H]+||[M+H]+||[M+H]+||[M+H]+	PE-Cer(d14:1(4E)/22:0)||PE-Cer(d16:1(4E)/20:0)||SM(d16:1/17:0)||SM(d18:1/15:0)	LMSP03020008||LMSP03020022||LMSP03010037||LMSP03010038	-0.83||-0.83||-0.83||-0.83
690.506	C37H69O8P||C37H69O8P||C37H69O8P||C37H69O8P||C37H69O8P||C37H69O8P||C37H69O8P||C37H69O8P||C37H69O8P||C37H69O8P||C37H69O8P||C37H69O8P||C37H69O8P||C37H69O8P||C37H69O8P||C37H72NO8P||C37H72NO8P||C37H72NO8P||C37H72NO8P||C37H72NO8P||C37H72NO8P||C37H72NO8P||C37H72NO8P||C37H72NO8P||C37H72NO8P||C37H72NO8P||C37H72NO8P||C37H72NO8P||C37H72NO8P||C37H72NO8P||C37H72NO8P||C37H72NO8P||C37H72NO8P||C37H72NO8P||C37H72…	[M+NH4]+||[M+NH4]+||[M+NH4]+||[M+NH4]+||[M+NH4]+||[M+NH4]+||[M+NH4]+||[M+NH4]+||[M+NH4]+||[M+NH4]+||[M+NH4]+||[M+NH4]+||[M+NH4]+||[M+NH4]+||[M+NH4]+||[M+H]+||[M+H]+||[M+H]+||[M+H]+||[M+H]+||[M+H]+||[M+H]+||[M+H]+||[M+H]+||[M+H]+||[M+H]+||[M+H]+||[M+H]+||[M+H]+||[M+H]+||[M+H]+||[M+H]+||[M+H]+||[M+H]+||[M+H]+||[M+H]+||[M+H]+||[M+H]+||[M+H]+	PA(12:0/22:2(13Z,16Z))||PA(14:0/20:2(11Z,14Z))||PA(14:1(9Z)/20:1(11Z))||PA(15:1(9Z)/19:1(9Z))||PA(16:0/18:2(9Z,12Z))||PA(16:1(9Z)/18:1(9Z))||PA(17:0/17:2(9Z,12Z))||PA(17:1(9Z)/17:1(9Z))||PA(17:2(9Z,12Z)/17:0)||PA(18:1(9Z)/16:1(9Z))||PA(18:2(9Z,12Z)/16:0)||PA(19:1(9Z)/15:1(9Z))||PA(20:1(11Z)/14:1(9Z))||PA(20:2(11Z,14Z)/14:0)||PA(22:2(13Z,16Z)/12:0)||PC(12:0/17:1(9Z))||PC(13:0/16:1(9Z))||PC(14:0/15…	LMGP10010064||LMGP10010101||LMGP10010126||LMGP10010177||LMGP10010023||LMGP10010903||LMGP10010230||LMGP10010892||LMGP10010284||LMGP10010881||LMGP10010877||LMGP10010483||LMGP10010529||LMGP10010558||LMGP10010755||LMGP01011321||LMGP01011343||LMGP01011365||LMGP01011382||LMGP01011411||LMGP01011433||LMGP01011474||LMGP01011521||LMGP01010735||LMGP02010372||LMGP02010395||LMGP02011247||LMGP02010432||LMGP020…	-0.48||-0.48||-0.48||-0.48||-0.48||-0.48||-0.48||-0.48||-0.48||-0.48||-0.48||-0.48||-0.48||-0.48||-0.48||-0.48||-0.48||-0.48||-0.48||-0.48||-0.48||-0.48||-0.48||-0.48||-0.48||-0.48||-0.48||-0.48||-0.48||-0.48||-0.48||-0.48||-0.48||-0.48||-0.48||-0.48||-0.48||-0.48||-0.48
693.446	C37H67O8P||C37H67O8P||C37H67O8P||C37H67O8P||C37H67O8P||C37H67O8P||C37H67O8P||C37H67O8P||C37H67O8P||C37H67O8P||C37H67O8P||C37H67O8P||C34H62NO10P||C34H62NO10P||C34H62NO10P||C39H65O8P||C39H65O8P||C39H65O8P||C39H65O8P||C39H65O8P||C39H65O8P||C39H65O8P||C39H65O8P||C39H65O8P||C39H65O8P	[M+Na]+||[M+Na]+||[M+Na]+||[M+Na]+||[M+Na]+||[M+Na]+||[M+Na]+||[M+Na]+||[M+Na]+||[M+Na]+||[M+Na]+||[M+Na]+||[M+NH4]+||[M+NH4]+||[M+NH4]+||[M+H]+||[M+H]+||[M+H]+||[M+H]+||[M+H]+||[M+H]+||[M+H]+||[M+H]+||[M+H]+||[M+H]+	PA(14:0/20:3(8Z,11Z,14Z))||PA(14:1(9Z)/20:2(11Z,14Z))||PA(16:0/18:3(6Z,9Z,12Z))||PA(16:0/18:3(9Z,12Z,15Z))||PA(16:1(9Z)/18:2(9Z,12Z))||PA(17:1(9Z)/17:2(9Z,12Z))||PA(17:2(9Z,12Z)/17:1(9Z))||PA(18:2(9Z,12Z)/16:1(9Z))||PA(18:3(6Z,9Z,12Z)/16:0)||PA(18:3(9Z,12Z,15Z)/16:0)||PA(20:2(11Z,14Z)/14:1(9Z))||PA(20:3(8Z,11Z,14Z)/14:0)||OHOOA-PC||PKDdiA-PE||PS(14:1(9Z)/14:1(9Z))||PA(14:0/22:6(4Z,7Z,10Z,13Z,16Z,…	LMGP10010102||LMGP10010127||LMGP10010907||LMGP10010975||LMGP10010902||LMGP10010255||LMGP10010285||LMGP10010344||LMGP10010370||LMGP10010956||LMGP10010559||LMGP10010589||LMGP20010037||LMGP20020024||LMGP03010919||LMGP10010922||LMGP10010218||LMGP10010351||LMGP10010378||LMGP10010379||LMGP10010407||LMGP10010016||LMGP10010436||LMGP10010654||LMGP10010818	-0.61||-0.61||-0.61||-0.61||-0.61||-0.61||-0.61||-0.61||-0.61||-0.61||-0.61||-0.61||1.72||1.72||1.72||-4.08||-4.08||-4.08||-4.08||-4.08||-4.08||-4.08||-4.08||-4.08||-4.08
695.462	C37H69O8P||C37H69O8P||C37H69O8P||C37H69O8P||C37H69O8P||C37H69O8P||C37H69O8P||C37H69O8P||C37H69O8P||C37H69O8P||C37H69O8P||C37H69O8P||C37H69O8P||C37H69O8P||C37H69O8P||C34H64NO10P||C34H64NO10P||C34H64NO10P||C34H64NO10P||C34H64NO10P||C34H64NO10P||C39H67O8P||C39H67O8P||C39H67O8P||C39H67O8P||C39H67O8P||C39H67O8P||C39H67O8P||C39H67O8P||C39H67O8P||C39H67O8P||C39H67O8P||C39H67O8P	[M+Na]+||[M+Na]+||[M+Na]+||[M+Na]+||[M+Na]+||[M+Na]+||[M+Na]+||[M+Na]+||[M+Na]+||[M+Na]+||[M+Na]+||[M+Na]+||[M+Na]+||[M+Na]+||[M+Na]+||[M+NH4]+||[M+NH4]+||[M+NH4]+||[M+NH4]+||[M+NH4]+||[M+NH4]+||[M+H]+||[M+H]+||[M+H]+||[M+H]+||[M+H]+||[M+H]+||[M+H]+||[M+H]+||[M+H]+||[M+H]+||[M+H]+||[M+H]+	PA(12:0/22:2(13Z,16Z))||PA(14:0/20:2(11Z,14Z))||PA(14:1(9Z)/20:1(11Z))||PA(15:1(9Z)/19:1(9Z))||PA(16:0/18:2(9Z,12Z))||PA(16:1(9Z)/18:1(9Z))||PA(17:0/17:2(9Z,12Z))||PA(17:1(9Z)/17:1(9Z))||PA(17:2(9Z,12Z)/17:0)||PA(18:1(9Z)/16:1(9Z))||PA(18:2(9Z,12Z)/16:0)||PA(19:1(9Z)/15:1(9Z))||PA(20:1(11Z)/14:1(9Z))||PA(20:2(11Z,14Z)/14:0)||PA(22:2(13Z,16Z)/12:0)||PS(12:0/16:1(9Z))||PS(13:0/15:1(9Z))||PS(14:0/14…	LMGP10010064||LMGP10010101||LMGP10010126||LMGP10010177||LMGP10010023||LMGP10010903||LMGP10010230||LMGP10010892||LMGP10010284||LMGP10010881||LMGP10010877||LMGP10010483||LMGP10010529||LMGP10010558||LMGP10010755||LMGP03010049||LMGP03010071||LMGP03010094||LMGP03010111||LMGP03010162||LMGP03010201||LMGP10010135||LMGP10010904||LMGP10010900||LMGP10010329||LMGP10010349||LMGP10010350||LMGP10010377||LMGP100…	-0.22||-0.22||-0.22||-0.22||-0.22||-0.22||-0.22||-0.22||-0.22||-0.22||-0.22||-0.22||-0.22||-0.22||-0.22||2.11||2.11||2.11||2.11||2.11||2.11||-3.68||-3.68||-3.68||-3.68||-3.68||-3.68||-3.68||-3.68||-3.68||-3.68||-3.68||-3.68
695.7	C44H87NO3||C44H87NO3	[M+NH4]+||[M+NH4]+	Cer(d18:0/26:1(17Z))||Cer(d18:1/26:0)	LMSP02020013||LMSP02010011	-3.24||-3.24
697.478	C37H71O8P||C37H71O8P||C37H71O8P||C37H71O8P||C37H71O8P||C37H71O8P||C37H71O8P||C37H71O8P||C37H71O8P||C37H71O8P||C37H71O8P||C37H71O8P||C37H71O8P||C37H71O8P||C37H71O8P||C37H71O8P||C37H71O8P||C34H66NO10P||C34H66NO10P||C34H66NO10P||C34H66NO10P||C34H66NO10P||C39H69O8P||C39H69O8P||C39H69O8P||C39H69O8P||C39H69O8P||C39H69O8P||C39H69O8P||C39H69O8P||C39H69O8P||C39H69O8P||C39H69O8P||C39H69O8P||C39H69O8P	[M+Na]+||[M+Na]+||[M+Na]+||[M+Na]+||[M+Na]+||[M+Na]+||[M+Na]+||[M+Na]+||[M+Na]+||[M+Na]+||[M+Na]+||[M+Na]+||[M+Na]+||[M+Na]+||[M+Na]+||[M+Na]+||[M+Na]+||[M+NH4]+||[M+NH4]+||[M+NH4]+||[M+NH4]+||[M+NH4]+||[M+H]+||[M+H]+||[M+H]+||[M+H]+||[M+H]+||[M+H]+||[M+H]+||[M+H]+||[M+H]+||[M+H]+||[M+H]+||[M+H]+||[M+H]+	PA(12:0/22:1(11Z))||PA(14:0/20:1(11Z))||PA(14:1(9Z)/20:0)||PA(15:0/19:1(9Z))||PA(15:1(9Z)/19:0)||PA(16:0/18:1(11Z))||PA(16:0/18:1(9Z))||PA(16:1(9Z)/18:0)||PA(17:0/17:1(9Z))||PA(17:1(9Z)/17:0)||PA(18:0/16:1(9Z))||PA(18:1(9Z)/16:0)||PA(19:0/15:1(9Z))||PA(19:1(9Z)/15:0)||PA(20:0/14:1(9Z))||PA(20:1(11Z)/14:0)||PA(22:1(11Z)/12:0)||PS(12:0/16:0)||PS(13:0/15:0)||PS(14:0/14:0)||PS(15:0/13:0)||PS(16:0/12:…	LMGP10010063||LMGP10010100||LMGP10010125||LMGP10010147||LMGP10010176||LMGP10010007||LMGP10010032||LMGP10010209||LMGP10010229||LMGP10010254||LMGP10010887||LMGP10010964||LMGP10010455||LMGP10010482||LMGP10010509||LMGP10010528||LMGP10010724||LMGP03010942||LMGP03010936||LMGP03010028||LMGP03010918||LMGP03010981||LMGP10010106||LMGP10010025||LMGP10010217||LMGP10010886||LMGP10010328||LMGP10010880||LMGP100…	-0.39||-0.39||-0.39||-0.39||-0.39||-0.39||-0.39||-0.39||-0.39||-0.39||-0.39||-0.39||-0.39||-0.39||-0.39||-0.39||-0.39||1.93||1.93||1.93||1.93||1.93||-3.84||-3.84||-3.84||-3.84||-3.84||-3.84||-3.84||-3.84||-3.84||-3.84||-3.84||-3.84||-3.84
697.525	C37H75N2O6P||C37H75N2O6P||C37H75N2O6P||C37H75N2O6P||C37H75N2O6P||C38H74O9||C38H74O9	[M+Na]+||[M+Na]+||[M+Na]+||[M+Na]+||[M+Na]+||[M+Na]+||[M+Na]+	PE-Cer(d14:1(4E)/21:0)||PE-Cer(d15:1(4E)/20:0)||PE-Cer(d16:1(4E)/19:0)||SM(d16:1/16:0)||SM(d18:1/14:0)||1-(O-alpha-D-glucopyranosyl)-29-keto-(1,3R,31R)-dotriacontanetriol||1-(O-alpha-D-mannopyranosyl)-29-keto-(1,3R,31R)-dotriacontanetriol	LMSP03020007||LMSP03020016||LMSP03020021||LMSP03010035||LMSP03010028||LMFA13010030||LMFA13010031	-0.85||-0.85||-0.85||-0.85||-0.85||3.44||3.44
698.481	C35H69O8PS	[M+NH4]+	1,2-ditetradecanoyl-sn-glycero-3-phosphosulfocholine	LMGP00000051	2.52
701.559	C39H74NO6P||C39H77N2O6P||C39H77N2O6P||C39H77N2O6P||C39H77N2O6P||C39H77N2O6P||C39H77N2O6P	[M+NH4]+||[M+H]+||[M+H]+||[M+H]+||[M+H]+||[M+H]+||[M+H]+	1-tetradecanyl-2-(8-[3]-ladderane-octanyl)-sn-glycerophosphoethanolamine||PE-Cer(d14:2(4E,6E)/23:0)||PE-Cer(d15:2(4E,6E)/22:0)||PE-Cer(d16:2(4E,6E)/21:0)||SM(d16:1/18:1)||SM(d18:1/16:1)||SM(d18:2/16:0)	LMGP02040015||LMSP03020041||LMSP03020045||LMSP03020057||LMSP03010040||LMSP03010041||LMSP03010090	-0.28||-0.29||-0.29||-0.29||-0.29||-0.29||-0.29
702.58	C40H80NO6P	[M+H]+	CerP(d18:1/22:0)	LMSP02050006	0.76
703.575	C39H79N2O6P||C39H79N2O6P||C39H79N2O6P||C39H79N2O6P||C39H79N2O6P||C39H79N2O6P	[M+H]+||[M+H]+||[M+H]+||[M+H]+||[M+H]+||[M+H]+	PE-Cer(d14:1(4E)/23:0)||PE-Cer(d15:1(4E)/22:0)||PE-Cer(d16:1(4E)/21:0)||SM(d16:1/18:0)||SM(d17:1/17:0)||SM(d18:1/16:0)	LMSP03020010||LMSP03020017||LMSP03020023||LMSP03010042||LMSP03010043||LMSP03010003	-0.26||-0.26||-0.26||-0.26||-0.26||-0.26
704.522	C38H71O8P||C38H71O8P||C38H71O8P||C38H71O8P||C38H71O8P||C38H71O8P||C38H71O8P||C38H71O8P||C38H71O8P||C38H71O8P||C38H71O8P||C38H71O8P||C38H71O8P||C38H71O8P||C38H74NO8P||C38H74NO8P||C38H74NO8P||C38H74NO8P||C38H74NO8P||C38H74NO8P||C38H74NO8P||C38H74NO8P||C38H74NO8P||C38H74NO8P||C38H74NO8P||C38H74NO8P||C38H74NO8P||C38H74NO8P||C38H74NO8P||C38H74NO8P||C38H74NO8P||C38H74NO8P||C38H74NO8P||C38H74NO8P||C38H7…	[M+NH4]+||[M+NH4]+||[M+NH4]+||[M+NH4]+||[M+NH4]+||[M+NH4]+||[M+NH4]+||[M+NH4]+||[M+NH4]+||[M+NH4]+||[M+NH4]+||[M+NH4]+||[M+NH4]+||[M+NH4]+||[M+H]+||[M+H]+||[M+H]+||[M+H]+||[M+H]+||[M+H]+||[M+H]+||[M+H]+||[M+H]+||[M+H]+||[M+H]+||[M+H]+||[M+H]+||[M+H]+||[M+H]+||[M+H]+||[M+H]+||[M+H]+||[M+H]+||[M+H]+||[M+H]+||[M+H]+||[M+H]+||[M+H]+||[M+H]+||[M+NH4]+	PA(13:0/22:2(13Z,16Z))||PA(15:0/20:2(11Z,14Z))||PA(15:1(9Z)/20:1(11Z))||PA(16:1(9Z)/19:1(9Z))||PA(17:0/18:2(9Z,12Z))||PA(17:1(9Z)/18:1(9Z))||PA(17:2(9Z,12Z)/18:0)||PA(18:0/17:2(9Z,12Z))||PA(18:1(9Z)/17:1(9Z))||PA(18:2(9Z,12Z)/17:0)||PA(19:1(9Z)/16:1(9Z))||PA(20:1(11Z)/15:1(9Z))||PA(20:2(11Z,14Z)/15:0)||PA(22:2(13Z,16Z)/13:0)||PC(12:0/18:1(9Z))||PC(13:0/17:1(9Z))||PC(14:0/16:1(9Z))||PC(14:1(9Z)/16…	LMGP10010088||LMGP10010150||LMGP10010179||LMGP10010213||LMGP10010231||LMGP10010257||LMGP10010286||LMGP10010312||LMGP10010326||LMGP10010345||LMGP10010485||LMGP10010531||LMGP10010560||LMGP10010756||LMGP01010440||LMGP01011344||LMGP01010485||LMGP01011384||LMGP01011412||LMGP01011435||LMGP01011463||LMGP01011475||LMGP01011522||LMGP01011595||LMGP02010396||LMGP02010414||LMGP02010438||LMGP02010458||LMGP020…	-0.3||-0.3||-0.3||-0.3||-0.3||-0.3||-0.3||-0.3||-0.3||-0.3||-0.3||-0.3||-0.3||-0.3||-0.3||-0.3||-0.3||-0.3||-0.3||-0.3||-0.3||-0.3||-0.3||-0.3||-0.3||-0.3||-0.3||-0.3||-0.3||-0.3||-0.3||-0.3||-0.3||-0.3||-0.3||-0.3||-0.3||-0.3||-0.3||-3.66
705.581	C47H76O4||C40H81O7P||C40H81O7P||C40H81O7P	[M+H]+||[M+H]+||[M+H]+||[M+H]+	Cholesteryl 11-hydroperoxy-eicosatetraenoate||PA(O-16:0/21:0)||PA(O-18:0/19:0)||PA(O-20:0/17:0)	LMST01020029||LMGP10020015||LMGP10020033||LMGP10020049	-0.39||2.97||2.97||2.97
705.59	C39H81N2O6P||C39H81N2O6P	[M+H]+||[M+H]+	SM(d16:0/18:0)||SM(d18:0/16:0)	LMSP03010095||LMSP03010004	-0.27||-0.27
706.538	C38H73O8P||C38H73O8P||C38H73O8P||C38H73O8P||C38H73O8P||C38H73O8P||C38H73O8P||C38H73O8P||C38H73O8P||C38H73O8P||C38H73O8P||C38H73O8P||C38H73O8P||C38H73O8P||C38H73O8P||C38H73O8P||C38H76NO8P||C38H76NO8P||C38H76NO8P||C38H76NO8P||C38H76NO8P||C38H76NO8P||C38H76NO8P||C38H76NO8P||C38H76NO8P||C38H76NO8P||C38H76NO8P||C38H76NO8P||C38H76NO8P||C38H76NO8P||C38H76NO8P||C38H76NO8P||C38H76NO8P||C38H76NO8P||C38H76N…	[M+NH4]+||[M+NH4]+||[M+NH4]+||[M+NH4]+||[M+NH4]+||[M+NH4]+||[M+NH4]+||[M+NH4]+||[M+NH4]+||[M+NH4]+||[M+NH4]+||[M+NH4]+||[M+NH4]+||[M+NH4]+||[M+NH4]+||[M+NH4]+||[M+H]+||[M+H]+||[M+H]+||[M+H]+||[M+H]+||[M+H]+||[M+H]+||[M+H]+||[M+H]+||[M+H]+||[M+H]+||[M+H]+||[M+H]+||[M+H]+||[M+H]+||[M+H]+||[M+H]+||[M+H]+||[M+H]+||[M+H]+||[M+H]+||[M+H]+||[M+H]+||[M+NH4]+||[M+NH4]+	PA(13:0/22:1(11Z))||PA(14:1(9Z)/21:0)||PA(15:0/20:1(11Z))||PA(15:1(9Z)/20:0)||PA(16:0/19:1(9Z))||PA(16:1(9Z)/19:0)||PA(17:0/18:1(9Z))||PA(17:1(9Z)/18:0)||PA(18:0/17:1(9Z))||PA(18:1(9Z)/17:0)||PA(19:0/16:1(9Z))||PA(19:1(9Z)/16:0)||PA(20:0/15:1(9Z))||PA(20:1(11Z)/15:0)||PA(21:0/14:1(9Z))||PA(22:1(11Z)/13:0)||PC(10:0/20:0)||PC(11:0/19:0)||PC(12:0/18:0)||PC(13:0/17:0)||PC(14:0/16:0)||PC(15:0/15:0)||P…	LMGP10010087||LMGP10010131||LMGP10010149||LMGP10010178||LMGP10010194||LMGP10010212||LMGP10010894||LMGP10010256||LMGP10010311||LMGP10010325||LMGP10010456||LMGP10010484||LMGP10010511||LMGP10010530||LMGP10010676||LMGP10010725||LMGP01010395||LMGP01010416||LMGP01010438||LMGP01010461||LMGP01010481||LMGP01010530||LMGP01010560||LMGP01010702||LMGP01010736||LMGP01010969||LMGP01010995||LMGP01011265||LMGP020…	-0.33||-0.33||-0.33||-0.33||-0.33||-0.33||-0.33||-0.33||-0.33||-0.33||-0.33||-0.33||-0.33||-0.33||-0.33||-0.33||-0.34||-0.34||-0.34||-0.34||-0.34||-0.34||-0.34||-0.34||-0.34||-0.34||-0.34||-0.34||-0.34||-0.34||-0.34||-0.34||-0.34||-0.34||-0.34||-0.34||-0.34||-0.34||-0.34||-3.69||-3.69
708.653	C44H82O5||C44H82O5||C44H82O5	[M+NH4]+||[M+NH4]+||[M+NH4]+	DG(19:0/22:2(13Z,16Z)/0:0)[iso2]||DG(19:1(9Z)/22:1(11Z)/0:0)[iso2]||DG(20:2(11Z,14Z)/21:0/0:0)[iso2]	LMGL02010222||LMGL02010540||LMGL02010209	4.77||4.77||4.77
709.408	C36H63O10P||C36H63O10P	[M+Na]+||[M+Na]+	PG(12:0/18:4(6Z,9Z,12Z,15Z))||PG(18:4(6Z,9Z,12Z,15Z)/12:0)	LMGP04010056||LMGP04010425	3.72||3.72
712.439	C34H63O12P||C34H66NO12P	[M+NH4]+||[M+H]+	PHODA-PG||Lipid X	LMGP20060001||LMSL01020001	-0.37||-0.37
712.648	C43H82O6||C43H82O6||C43H82O6||C43H82O6	[M+NH4]+||[M+NH4]+||[M+NH4]+||[M+NH4]+	TG(12:0/12:0/16:0)[iso3]||TG(12:0/13:0/15:0)[iso6]||TG(12:0/14:0/14:0)[iso3]||TG(13:0/13:0/14:0)[iso3]	LMGL03012632||LMGL03013179||LMGL03012660||LMGL03012691	3.75||3.75||3.75||3.75
716.45	C37H66NO10P||C37H66NO10P||C37H66NO10P||C37H66NO10P||C37H66NO10P||C37H66NO10P||C35H68NO10P||C35H68NO10P||C35H68NO10P||C35H68NO10P||C35H68NO10P||C35H68NO10P	[M+H]+||[M+H]+||[M+H]+||[M+H]+||[M+H]+||[M+H]+||[M+Na]+||[M+Na]+||[M+Na]+||[M+Na]+||[M+Na]+||[M+Na]+	PS(13:0/18:3(6Z,9Z,12Z))||PS(13:0/18:3(9Z,12Z,15Z))||PS(14:1(9Z)/17:2(9Z,12Z))||PS(17:2(9Z,12Z)/14:1(9Z))||PS(18:3(6Z,9Z,12Z)/13:0)||PS(18:3(9Z,12Z,15Z)/13:0)||PS(12:0/17:0)||PS(13:0/16:0)||PS(14:0/15:0)||PS(15:0/14:0)||PS(16:0/13:0)||PS(17:0/12:0)	LMGP03010079||LMGP03010080||LMGP03010118||LMGP03010281||LMGP03010367||LMGP03010398||LMGP03010050||LMGP03010072||LMGP03010930||LMGP03010140||LMGP03010192||LMGP03010226	-0.07||-0.07||-0.07||-0.07||-0.07||-0.07||3.28||3.28||3.28||3.28||3.28||3.28
716.522	C39H71O8P||C39H71O8P||C39H71O8P||C39H71O8P||C39H71O8P||C39H71O8P||C39H71O8P||C39H71O8P||C39H71O8P||C39H71O8P||C39H71O8P||C39H71O8P||C39H71O8P||C39H71O8P||C39H74NO8P||C39H74NO8P||C39H74NO8P||C39H74NO8P||C39H74NO8P||C39H74NO8P||C39H74NO8P||C39H74NO8P||C39H74NO8P||C39H74NO8P||C39H74NO8P||C39H74NO8P||C39H74NO8P||C39H74NO8P||C39H74NO8P||C39H74NO8P||C39H74NO8P||C39H74NO8P||C39H74NO8P||C39H74NO8P||C39H7…	[M+NH4]+||[M+NH4]+||[M+NH4]+||[M+NH4]+||[M+NH4]+||[M+NH4]+||[M+NH4]+||[M+NH4]+||[M+NH4]+||[M+NH4]+||[M+NH4]+||[M+NH4]+||[M+NH4]+||[M+NH4]+||[M+H]+||[M+H]+||[M+H]+||[M+H]+||[M+H]+||[M+H]+||[M+H]+||[M+H]+||[M+H]+||[M+H]+||[M+H]+||[M+H]+||[M+H]+||[M+H]+||[M+H]+||[M+H]+||[M+H]+||[M+H]+||[M+H]+||[M+H]+||[M+H]+||[M+H]+||[M+H]+||[M+H]+	PA(14:1(9Z)/22:2(13Z,16Z))||PA(16:0/20:3(8Z,11Z,14Z))||PA(16:1(9Z)/20:2(11Z,14Z))||PA(17:2(9Z,12Z)/19:1(9Z))||PA(18:0/18:3(6Z,9Z,12Z))||PA(18:0/18:3(9Z,12Z,15Z))||PA(18:1(9Z)/18:2(9Z,12Z))||PA(18:2(9Z,12Z)/18:1(9Z))||PA(18:3(6Z,9Z,12Z)/18:0)||PA(18:3(9Z,12Z,15Z)/18:0)||PA(19:1(9Z)/17:2(9Z,12Z))||PA(20:2(11Z,14Z)/16:1(9Z))||PA(20:3(8Z,11Z,14Z)/16:0)||PA(22:2(13Z,16Z)/14:1(9Z))||PC(13:0/18:2(9Z,12Z…	LMGP10010134||LMGP10010905||LMGP10010216||LMGP10010293||LMGP10010313||LMGP10010314||LMGP10010961||LMGP10010348||LMGP10010375||LMGP10010405||LMGP10010488||LMGP10010563||LMGP10010593||LMGP10010758||LMGP01011348||LMGP01011368||LMGP01011387||LMGP01011438||LMGP01011478||LMGP01011524||LMGP01011553||LMGP01011615||LMGP02010379||LMGP02010416||LMGP02010441||LMGP02010492||LMGP02011269||LMGP02010042||LMGP020…	-0.44||-0.44||-0.44||-0.44||-0.44||-0.44||-0.44||-0.44||-0.44||-0.44||-0.44||-0.44||-0.44||-0.44||-0.44||-0.44||-0.44||-0.44||-0.44||-0.44||-0.44||-0.44||-0.44||-0.44||-0.44||-0.44||-0.44||-0.44||-0.44||-0.44||-0.44||-0.44||-0.44||-0.44||-0.44||-0.44||-0.44||-0.44
716.558	C45H75NO4||C40H75O7P||C40H78NO7P||C40H78NO7P||C40H78NO7P||C40H78NO7P||C40H78NO7P||C40H78NO7P||C40H78NO7P||C40H78NO7P||C40H78NO7P||C40H78NO7P	[M+Na]+||[M+NH4]+||[M+H]+||[M+H]+||[M+H]+||[M+H]+||[M+H]+||[M+H]+||[M+H]+||[M+H]+||[M+H]+||[M+H]+	Cholesteryl nitrolinoleate||PA(P-20:0/17:2(9Z,12Z))||PC(O-14:0/18:2(9Z,12Z))||PC(P-14:0/18:1(9Z))||PC(P-16:0/16:1(9Z))||PC(P-18:0/14:1(9Z))||PC(P-18:1(11Z)/14:0)||PC(P-18:1(9Z)/14:0)||PE(O-18:0/17:2(9Z,12Z))||PE(P-16:0/19:1(9Z))||PE(P-18:0/17:1(9Z))||PE(P-20:0/15:1(9Z))	LMST01020028||LMGP10030066||LMGP01020017||LMGP01030004||LMGP01030026||LMGP01030049||LMGP01030133||LMGP01030143||LMGP02020046||LMGP02030023||LMGP02030043||LMGP02030067	-0.87||-0.92||-0.92||-0.92||-0.92||-0.92||-0.92||-0.92||-0.92||-0.92||-0.92||-0.92
717.59	C40H81N2O6P||C40H81N2O6P||C40H81N2O6P||C40H81N2O6P	[M+H]+||[M+H]+||[M+H]+||[M+H]+	PE-Cer(d14:1(4E)/24:0)||PE-Cer(d16:1(4E)/22:0)||SM(d18:1/17:0)||SM(d19:1/16:0)	LMSP03020011||LMSP03020024||LMSP03010044||LMSP03010045	-0.33||-0.33||-0.33||-0.33
718.538	C39H73O8P||C39H73O8P||C39H73O8P||C39H73O8P||C39H73O8P||C39H73O8P||C39H73O8P||C39H73O8P||C39H73O8P||C39H73O8P||C39H73O8P||C39H73O8P||C39H73O8P||C39H73O8P||C39H73O8P||C39H76NO8P||C39H76NO8P||C39H76NO8P||C39H76NO8P||C39H76NO8P||C39H76NO8P||C39H76NO8P||C39H76NO8P||C39H76NO8P||C39H76NO8P||C39H76NO8P||C39H76NO8P||C39H76NO8P||C39H76NO8P||C39H76NO8P||C39H76NO8P||C39H76NO8P||C39H76NO8P||C39H76NO8P||C39H76…	[M+NH4]+||[M+NH4]+||[M+NH4]+||[M+NH4]+||[M+NH4]+||[M+NH4]+||[M+NH4]+||[M+NH4]+||[M+NH4]+||[M+NH4]+||[M+NH4]+||[M+NH4]+||[M+NH4]+||[M+NH4]+||[M+NH4]+||[M+H]+||[M+H]+||[M+H]+||[M+H]+||[M+H]+||[M+H]+||[M+H]+||[M+H]+||[M+H]+||[M+H]+||[M+H]+||[M+H]+||[M+H]+||[M+H]+||[M+H]+||[M+H]+||[M+H]+||[M+H]+||[M+H]+||[M+H]+||[M+H]+||[M+H]+||[M+H]+||[M+H]+||[M+H]+||[M+H]+||[M+H]+||[M+H]+||[M+H]+||[M+H]+||[M+H]+	PA(14:0/22:2(13Z,16Z))||PA(14:1(9Z)/22:1(11Z))||PA(16:0/20:2(11Z,14Z))||PA(16:1(9Z)/20:1(11Z))||PA(17:1(9Z)/19:1(9Z))||PA(17:2(9Z,12Z)/19:0)||PA(18:0/18:2(9Z,12Z))||PA(18:1(9Z)/18:1(9Z))||PA(18:2(9Z,12Z)/18:0)||PA(19:0/17:2(9Z,12Z))||PA(19:1(9Z)/17:1(9Z))||PA(20:1(11Z)/16:1(9Z))||PA(20:2(11Z,14Z)/16:0)||PA(22:1(11Z)/14:1(9Z))||PA(22:2(13Z,16Z)/14:0)||PC(12:0/19:1(9Z))||PC(13:0/18:1(9Z))||PC(14:0/…	LMGP10010105||LMGP10010133||LMGP10010195||LMGP10010215||LMGP10010263||LMGP10010292||LMGP10010036||LMGP10010962||LMGP10010876||LMGP10010459||LMGP10010487||LMGP10010533||LMGP10010562||LMGP10010727||LMGP10010757||LMGP01011328||LMGP01011347||LMGP01011367||LMGP01011386||LMGP01010535||LMGP01011437||LMGP01010002||LMGP01011464||LMGP01011477||LMGP01010008||LMGP01011523||LMGP01011596||LMGP01011756||LMGP020…	-0.46||-0.46||-0.46||-0.46||-0.46||-0.46||-0.46||-0.46||-0.46||-0.46||-0.46||-0.46||-0.46||-0.46||-0.46||-0.46||-0.46||-0.46||-0.46||-0.46||-0.46||-0.46||-0.46||-0.46||-0.46||-0.46||-0.46||-0.46||-0.46||-0.46||-0.46||-0.46||-0.46||-0.46||-0.46||-0.46||-0.46||-0.46||-0.46||-0.46||-0.46||-0.46||-0.46||-0.46||-0.46||-0.46
718.574	C40H77O7P||C40H77O7P||C40H77O7P||C40H80NO7P||C40H80NO7P||C40H80NO7P||C40H80NO7P||C40H80NO7P||C40H80NO7P||C40H80NO7P||C40H80NO7P||C40H80NO7P||C40H80NO7P||C40H80NO7P||C40H80NO7P	[M+NH4]+||[M+NH4]+||[M+NH4]+||[M+H]+||[M+H]+||[M+H]+||[M+H]+||[M+H]+||[M+H]+||[M+H]+||[M+H]+||[M+H]+||[M+H]+||[M+H]+||[M+H]+	PA(O-20:0/17:2(9Z,12Z))||PA(P-18:0/19:1(9Z))||PA(P-20:0/17:1(9Z))||PC(O-14:0/18:1(9Z))||PC(O-16:0/16:1(9Z))||PC(O-18:0/14:1(9Z))||PC(P-16:0/16:0)||PC(P-18:0/14:0)||PC(P-20:0/12:0)||PE(O-16:0/19:1(9Z))||PE(O-18:0/17:1(9Z))||PE(O-20:0/15:1(9Z))||PE(P-16:0/19:0)||PE(P-18:0/17:0)||PE(P-20:0/15:0)	LMGP10020051||LMGP10030045||LMGP10030065||LMGP01020016||LMGP01020182||LMGP01020196||LMGP01030025||LMGP01030048||LMGP01030074||LMGP02020031||LMGP02020045||LMGP02020066||LMGP02030022||LMGP02030042||LMGP02030066	-0.39||-0.39||-0.39||-0.39||-0.39||-0.39||-0.39||-0.39||-0.39||-0.39||-0.39||-0.39||-0.39||-0.39||-0.39
719.462	C39H69O8P||C39H69O8P||C39H69O8P||C39H69O8P||C39H69O8P||C39H69O8P||C39H69O8P||C39H69O8P||C39H69O8P||C39H69O8P||C39H69O8P||C39H69O8P||C39H69O8P||C36H64NO10P||C36H64NO10P||C36H64NO10P||C36H64NO10P||C41H67O8P||C41H67O8P||C41H67O8P||C41H67O8P||C41H67O8P||C41H67O8P||C41H67O8P||C41H67O8P||C41H67O8P||C41H67O8P	[M+Na]+||[M+Na]+||[M+Na]+||[M+Na]+||[M+Na]+||[M+Na]+||[M+Na]+||[M+Na]+||[M+Na]+||[M+Na]+||[M+Na]+||[M+Na]+||[M+Na]+||[M+NH4]+||[M+NH4]+||[M+NH4]+||[M+NH4]+||[M+H]+||[M+H]+||[M+H]+||[M+H]+||[M+H]+||[M+H]+||[M+H]+||[M+H]+||[M+H]+||[M+H]+	PA(14:0/22:4(7Z,10Z,13Z,16Z))||PA(16:0/20:4(5Z,8Z,11Z,14Z))||PA(16:1(9Z)/20:3(8Z,11Z,14Z))||PA(18:0/18:4(6Z,9Z,12Z,15Z))||PA(18:1(9Z)/18:3(6Z,9Z,12Z))||PA(18:1(9Z)/18:3(9Z,12Z,15Z))||PA(18:2(9Z,12Z)/18:2(9Z,12Z))||PA(18:3(6Z,9Z,12Z)/18:1(9Z))||PA(18:3(9Z,12Z,15Z)/18:1(9Z))||PA(18:4(6Z,9Z,12Z,15Z)/18:0)||PA(20:3(8Z,11Z,14Z)/16:1(9Z))||PA(20:4(5Z,8Z,11Z,14Z)/16:0)||PA(22:4(7Z,10Z,13Z,16Z)/14:0)||PS…	LMGP10010106||LMGP10010025||LMGP10010217||LMGP10010886||LMGP10010328||LMGP10010880||LMGP10010957||LMGP10010376||LMGP10010873||LMGP10010434||LMGP10010594||LMGP10010858||LMGP10010788||LMGP03010054||LMGP03010055||LMGP03010366||LMGP03010397||LMGP10010899||LMGP10010358||LMGP10010387||LMGP10010415||LMGP10010445||LMGP10010603||LMGP10010631||LMGP10010632||LMGP10010659||LMGP10010822	-0.69||-0.69||-0.69||-0.69||-0.69||-0.69||-0.69||-0.69||-0.69||-0.69||-0.69||-0.69||-0.69||1.56||1.56||1.56||1.56||-4.04||-4.04||-4.04||-4.04||-4.04||-4.04||-4.04||-4.04||-4.04||-4.04
720.553	C39H75O8P||C39H75O8P||C39H75O8P||C39H75O8P||C39H75O8P||C39H75O8P||C39H75O8P||C39H75O8P||C39H75O8P||C39H75O8P||C39H75O8P||C39H75O8P||C39H75O8P||C39H75O8P||C39H75O8P||C39H75O8P||C39H78NO8P||C39H78NO8P||C39H78NO8P||C39H78NO8P||C39H78NO8P||C39H78NO8P||C39H78NO8P||C39H78NO8P||C39H78NO8P||C39H78NO8P||C39H78NO8P||C39H78NO8P||C39H78NO8P||C39H78NO8P||C39H78NO8P||C39H78NO8P||C39H78NO8P||C39H78NO8P||C39H78N…	[M+NH4]+||[M+NH4]+||[M+NH4]+||[M+NH4]+||[M+NH4]+||[M+NH4]+||[M+NH4]+||[M+NH4]+||[M+NH4]+||[M+NH4]+||[M+NH4]+||[M+NH4]+||[M+NH4]+||[M+NH4]+||[M+NH4]+||[M+NH4]+||[M+H]+||[M+H]+||[M+H]+||[M+H]+||[M+H]+||[M+H]+||[M+H]+||[M+H]+||[M+H]+||[M+H]+||[M+H]+||[M+H]+||[M+H]+||[M+H]+||[M+H]+||[M+H]+||[M+H]+||[M+H]+||[M+H]+||[M+H]+||[M+H]+||[M+H]+||[M+H]+||[M+H]+||[M+H]+	PA(14:0/22:1(11Z))||PA(14:1(9Z)/22:0)||PA(15:1(9Z)/21:0)||PA(16:0/20:1(11Z))||PA(16:1(9Z)/20:0)||PA(17:0/19:1(9Z))||PA(17:1(9Z)/19:0)||PA(18:0/18:1(9Z))||PA(18:1(9Z)/18:0)||PA(19:0/17:1(9Z))||PA(19:1(9Z)/17:0)||PA(20:0/16:1(9Z))||PA(20:1(11Z)/16:0)||PA(21:0/15:1(9Z))||PA(22:0/14:1(9Z))||PA(22:1(11Z)/14:0)||PC(10:0/21:0)||PC(11:0/20:0)||PC(12:0/19:0)||PC(13:0/18:0)||PC(14:0/17:0)||PC(15:0/16:0)||P…	LMGP10010104||LMGP10010132||LMGP10010184||LMGP10010972||LMGP10010214||LMGP10010236||LMGP10010262||LMGP10010037||LMGP10010963||LMGP10010458||LMGP10010486||LMGP10010512||LMGP10010532||LMGP10010678||LMGP10010701||LMGP10010726||LMGP01010396||LMGP01010417||LMGP01011327||LMGP01011346||LMGP01011366||LMGP01010532||LMGP01010562||LMGP01011499||LMGP01011581||LMGP01010967||LMGP01010996||LMGP01011061||LMGP010…	-0.7||-0.7||-0.7||-0.7||-0.7||-0.7||-0.7||-0.7||-0.7||-0.7||-0.7||-0.7||-0.7||-0.7||-0.7||-0.7||-0.7||-0.7||-0.7||-0.7||-0.7||-0.7||-0.7||-0.7||-0.7||-0.7||-0.7||-0.7||-0.7||-0.7||-0.7||-0.7||-0.7||-0.7||-0.7||-0.7||-0.7||-0.7||-0.7||-0.7||-0.7
721.478	C39H71O8P||C39H71O8P||C39H71O8P||C39H71O8P||C39H71O8P||C39H71O8P||C39H71O8P||C39H71O8P||C39H71O8P||C39H71O8P||C39H71O8P||C39H71O8P||C39H71O8P||C39H71O8P||C36H66NO10P||C36H66NO10P||C36H66NO10P||C36H66NO10P||C36H66NO10P||C36H66NO10P||C36H66NO10P||C36H66NO10P||C41H69O8P||C41H69O8P||C41H69O8P||C41H69O8P||C41H69O8P||C41H69O8P||C41H69O8P||C41H69O8P||C41H69O8P||C41H69O8P||C41H69O8P||C41H69O8P	[M+Na]+||[M+Na]+||[M+Na]+||[M+Na]+||[M+Na]+||[M+Na]+||[M+Na]+||[M+Na]+||[M+Na]+||[M+Na]+||[M+Na]+||[M+Na]+||[M+Na]+||[M+Na]+||[M+NH4]+||[M+NH4]+||[M+NH4]+||[M+NH4]+||[M+NH4]+||[M+NH4]+||[M+NH4]+||[M+NH4]+||[M+H]+||[M+H]+||[M+H]+||[M+H]+||[M+H]+||[M+H]+||[M+H]+||[M+H]+||[M+H]+||[M+H]+||[M+H]+||[M+H]+	PA(14:1(9Z)/22:2(13Z,16Z))||PA(16:0/20:3(8Z,11Z,14Z))||PA(16:1(9Z)/20:2(11Z,14Z))||PA(17:2(9Z,12Z)/19:1(9Z))||PA(18:0/18:3(6Z,9Z,12Z))||PA(18:0/18:3(9Z,12Z,15Z))||PA(18:1(9Z)/18:2(9Z,12Z))||PA(18:2(9Z,12Z)/18:1(9Z))||PA(18:3(6Z,9Z,12Z)/18:0)||PA(18:3(9Z,12Z,15Z)/18:0)||PA(19:1(9Z)/17:2(9Z,12Z))||PA(20:2(11Z,14Z)/16:1(9Z))||PA(20:3(8Z,11Z,14Z)/16:0)||PA(22:2(13Z,16Z)/14:1(9Z))||PKODA-PC||PS(12:0/1…	LMGP10010134||LMGP10010905||LMGP10010216||LMGP10010293||LMGP10010313||LMGP10010314||LMGP10010961||LMGP10010348||LMGP10010375||LMGP10010405||LMGP10010488||LMGP10010563||LMGP10010593||LMGP10010758||LMGP20010019||LMGP03010053||LMGP03010075||LMGP03010115||LMGP03010166||LMGP03010204||LMGP03010279||LMGP03010340||LMGP10010038||LMGP10010878||LMGP10010875||LMGP10010386||LMGP10010414||LMGP10010444||LMGP100…	-0.4||-0.4||-0.4||-0.4||-0.4||-0.4||-0.4||-0.4||-0.4||-0.4||-0.4||-0.4||-0.4||-0.4||1.85||1.85||1.85||1.85||1.85||1.85||1.85||1.85||-3.73||-3.73||-3.73||-3.73||-3.73||-3.73||-3.73||-3.73||-3.73||-3.73||-3.73||-3.73
723.423	C37H65O10P||C37H65O10P	[M+Na]+||[M+Na]+	PG(13:0/18:4(6Z,9Z,12Z,15Z))||PG(18:4(6Z,9Z,12Z,15Z)/13:0)	LMGP04010081||LMGP04010426	3.41||3.41
723.493	C39H73O8P||C39H73O8P||C39H73O8P||C39H73O8P||C39H73O8P||C39H73O8P||C39H73O8P||C39H73O8P||C39H73O8P||C39H73O8P||C39H73O8P||C39H73O8P||C39H73O8P||C39H73O8P||C39H73O8P||C36H68NO10P||C36H68NO10P||C36H68NO10P||C36H68NO10P||C36H68NO10P||C36H68NO10P||C36H68NO10P||C36H68NO10P||C36H68NO10P||C36H68NO10P||C36H68NO10P||C41H71O8P||C41H71O8P||C41H71O8P||C41H71O8P||C41H71O8P||C41H71O8P||C41H71O8P||C41H71O8P||C41…	[M+Na]+||[M+Na]+||[M+Na]+||[M+Na]+||[M+Na]+||[M+Na]+||[M+Na]+||[M+Na]+||[M+Na]+||[M+Na]+||[M+Na]+||[M+Na]+||[M+Na]+||[M+Na]+||[M+Na]+||[M+NH4]+||[M+NH4]+||[M+NH4]+||[M+NH4]+||[M+NH4]+||[M+NH4]+||[M+NH4]+||[M+NH4]+||[M+NH4]+||[M+NH4]+||[M+NH4]+||[M+H]+||[M+H]+||[M+H]+||[M+H]+||[M+H]+||[M+H]+||[M+H]+||[M+H]+||[M+H]+||[M+H]+||[M+H]+||[M+H]+||[M+H]+||[M+H]+	PA(14:0/22:2(13Z,16Z))||PA(14:1(9Z)/22:1(11Z))||PA(16:0/20:2(11Z,14Z))||PA(16:1(9Z)/20:1(11Z))||PA(17:1(9Z)/19:1(9Z))||PA(17:2(9Z,12Z)/19:0)||PA(18:0/18:2(9Z,12Z))||PA(18:1(9Z)/18:1(9Z))||PA(18:2(9Z,12Z)/18:0)||PA(19:0/17:2(9Z,12Z))||PA(19:1(9Z)/17:1(9Z))||PA(20:1(11Z)/16:1(9Z))||PA(20:2(11Z,14Z)/16:0)||PA(22:1(11Z)/14:1(9Z))||PA(22:2(13Z,16Z)/14:0)||PHODA-PC||PS(12:0/18:1(9Z))||PS(13:0/17:1(9Z))…	LMGP10010105||LMGP10010133||LMGP10010195||LMGP10010215||LMGP10010263||LMGP10010292||LMGP10010036||LMGP10010962||LMGP10010876||LMGP10010459||LMGP10010487||LMGP10010533||LMGP10010562||LMGP10010727||LMGP10010757||LMGP20010020||LMGP03010940||LMGP03010074||LMGP03010929||LMGP03010114||LMGP03010142||LMGP03010165||LMGP03010193||LMGP03010203||LMGP03010249||LMGP03010322||LMGP10010223||LMGP10010884||LMGP100…	-0.46||-0.46||-0.46||-0.46||-0.46||-0.46||-0.46||-0.46||-0.46||-0.46||-0.46||-0.46||-0.46||-0.46||-0.46||1.78||1.78||1.78||1.78||1.78||1.78||1.78||1.78||1.78||1.78||1.78||-3.78||-3.78||-3.78||-3.78||-3.78||-3.78||-3.78||-3.78||-3.78||-3.78||-3.78||-3.78||-3.78||-3.78
723.588	C45H80O5||C45H80O5||C45H80O5||C45H80O5||C45H80O5	[M+Na]+||[M+Na]+||[M+Na]+||[M+Na]+||[M+Na]+	DG(20:0/22:4(7Z,10Z,13Z,16Z)/0:0)[iso2]||DG(20:1(11Z)/22:3(10Z,13Z,16Z)/0:0)[iso2]||DG(20:2(11Z,14Z)/22:2(13Z,16Z)/0:0)[iso2]||DG(20:3(8Z,11Z,14Z)/22:1(13Z)/0:0)[iso2]||DG(20:4(5Z,8Z,11Z,14Z)/22:0/0:0)[iso2]	LMGL02010240||LMGL02010230||LMGL02010247||LMGL02010237||LMGL02010236	-2.81||-2.81||-2.81||-2.81||-2.81
724.527	C41H71O7P||C41H71O7P||C41H74NO7P||C41H74NO7P||C41H74NO7P||C39H76NO7P||C39H76NO7P||C39H76NO7P||C39H76NO7P||C39H76NO7P||C39H76NO7P	[M+NH4]+||[M+NH4]+||[M+H]+||[M+H]+||[M+H]+||[M+Na]+||[M+Na]+||[M+Na]+||[M+Na]+||[M+Na]+||[M+Na]+	PA(O-16:0/22:6(4Z,7Z,10Z,13Z,16Z,19Z))||PA(P-18:0/20:5(5Z,8Z,11Z,14Z,17Z))||PE(O-16:0/20:5(5Z,8Z,11Z,14Z,17Z))||PE(P-16:0/20:4(5Z,8Z,11Z,14Z))||PE(P-18:0/18:4(6Z,9Z,12Z,15Z))||PC(P-16:0/15:1(9Z))||PE(O-16:0/18:2(9Z,12Z))||PE(P-16:0/18:1(9Z))||PE(P-18:0/16:1(9Z))||PE(P-20:0/14:1(9Z))||PnE(16:0/18:1(9Z))	LMGP10020090||LMGP10030050||LMGP02020095||LMGP02030093||LMGP02030049||LMGP01030024||LMGP02020100||LMGP02030095||LMGP02030041||LMGP02030065||LMGP17010001	-0.39||-0.39||-0.4||-0.4||-0.4||2.92||2.92||2.92||2.92||2.92||2.92
726.543	C41H73O7P||C41H73O7P||C41H73O7P||C41H73O7P||C41H76NO7P||C41H76NO7P||C41H76NO7P||C41H76NO7P||C41H76NO7P||C39H78NO7P||C39H78NO7P||C39H78NO7P||C39H78NO7P||C39H78NO7P||C39H78NO7P||C39H78NO7P||C39H78NO7P||C39H78NO7P	[M+NH4]+||[M+NH4]+||[M+NH4]+||[M+NH4]+||[M+H]+||[M+H]+||[M+H]+||[M+H]+||[M+H]+||[M+Na]+||[M+Na]+||[M+Na]+||[M+Na]+||[M+Na]+||[M+Na]+||[M+Na]+||[M+Na]+||[M+Na]+	PA(O-18:0/20:5(5Z,8Z,11Z,14Z,17Z))||PA(P-16:0/22:4(7Z,10Z,13Z,16Z))||PA(P-18:0/20:4(5Z,8Z,11Z,14Z))||PA(P-20:0/18:4(6Z,9Z,12Z,15Z))||PE(O-16:0/20:4(5Z,8Z,11Z,14Z))||PE(O-18:0/18:4(6Z,9Z,12Z,15Z))||PE(P-16:0/20:3(8Z,11Z,14Z))||PE(P-18:0/18:3(6Z,9Z,12Z))||PE(P-18:0/18:3(9Z,12Z,15Z))||PC(O-16:0/15:1(9Z))||PC(P-16:0/15:0)||PC(P-18:0/13:0)||PE(O-16:0/18:1(9Z))||PE(O-18:0/16:1(9Z))||PE(O-20:0/14:1(9Z))…	LMGP10020087||LMGP10030027||LMGP10030091||LMGP10030072||LMGP02020019||LMGP02020051||LMGP02030027||LMGP02030047||LMGP02030048||LMGP01020181||LMGP01030023||LMGP01030047||LMGP02020018||LMGP02020093||LMGP02020064||LMGP02030018||LMGP02030040||LMGP02030064	-0.07||-0.07||-0.07||-0.07||-0.07||-0.07||-0.07||-0.07||-0.07||3.24||3.24||3.24||3.24||3.24||3.24||3.24||3.24||3.24
727.572	C39H81N2O6P||C39H81N2O6P||C41H79N2O6P	[M+Na]+||[M+Na]+||[M+H]+	SM(d16:0/18:0)||SM(d18:0/16:0)||SM(d18:2/18:1)	LMSP03010095||LMSP03010004||LMSP03010047	-1.18||-1.18||-4.49
728.558	C41H75O7P||C41H75O7P||C41H75O7P||C41H75O7P||C41H75O7P||C41H75O7P||C41H78NO7P||C41H78NO7P||C41H78NO7P||C41H78NO7P||C41H78NO7P||C41H78NO7P||C39H80NO7P||C39H80NO7P||C39H80NO7P||C39H80NO7P||C39H80NO7P	[M+NH4]+||[M+NH4]+||[M+NH4]+||[M+NH4]+||[M+NH4]+||[M+NH4]+||[M+H]+||[M+H]+||[M+H]+||[M+H]+||[M+H]+||[M+H]+||[M+Na]+||[M+Na]+||[M+Na]+||[M+Na]+||[M+Na]+	PA(O-16:0/22:4(7Z,10Z,13Z,16Z))||PA(O-18:0/20:4(5Z,8Z,11Z,14Z))||PA(O-20:0/18:4(6Z,9Z,12Z,15Z))||PA(P-18:0/20:3(8Z,11Z,14Z))||PA(P-20:0/18:3(6Z,9Z,12Z))||PA(P-20:0/18:3(9Z,12Z,15Z))||PC(P-16:0/17:2(9Z,12Z))||PE(O-16:0/20:3(8Z,11Z,14Z))||PE(O-18:0/18:3(6Z,9Z,12Z))||PE(O-18:0/18:3(9Z,12Z,15Z))||PE(P-16:0/20:2(11Z,14Z))||PE(P-18:0/18:2(9Z,12Z))||PC(O-16:0/15:0)||PC(O-18:0/13:0)||PE(O-16:0/18:0)||PE(…	LMGP10020018||LMGP10020073||LMGP10020057||LMGP10030049||LMGP10030070||LMGP10030071||LMGP01030029||LMGP02020096||LMGP02020049||LMGP02020050||LMGP02030026||LMGP02030046||LMGP01020180||LMGP01020194||LMGP02020101||LMGP02020094||LMGP02020063	-0.54||-0.54||-0.54||-0.54||-0.54||-0.54||-0.54||-0.54||-0.54||-0.54||-0.54||-0.54||2.76||2.76||2.76||2.76||2.76
730.538	C40H73O8P||C40H73O8P||C40H73O8P||C40H73O8P||C40H73O8P||C40H73O8P||C40H73O8P||C40H73O8P||C40H73O8P||C40H73O8P||C40H73O8P||C40H73O8P||C40H73O8P||C40H73O8P||C40H76NO8P||C40H76NO8P||C40H76NO8P||C40H76NO8P||C40H76NO8P||C40H76NO8P||C40H76NO8P||C40H76NO8P||C40H76NO8P||C40H76NO8P||C40H76NO8P||C40H76NO8P||C40H76NO8P||C40H76NO8P||C40H76NO8P||C40H76NO8P||C40H76NO8P||C40H76NO8P||C40H76NO8P||C40H76NO8P||C40H7…	[M+NH4]+||[M+NH4]+||[M+NH4]+||[M+NH4]+||[M+NH4]+||[M+NH4]+||[M+NH4]+||[M+NH4]+||[M+NH4]+||[M+NH4]+||[M+NH4]+||[M+NH4]+||[M+NH4]+||[M+NH4]+||[M+H]+||[M+H]+||[M+H]+||[M+H]+||[M+H]+||[M+H]+||[M+H]+||[M+H]+||[M+H]+||[M+H]+||[M+H]+||[M+H]+||[M+H]+||[M+H]+||[M+H]+||[M+H]+||[M+H]+||[M+H]+||[M+H]+||[M+H]+||[M+H]+||[M+H]+||[M+H]+||[M+H]+||[M+H]+||[M+H]+||[M+H]+||[M+NH4]+	PA(15:1(9Z)/22:2(13Z,16Z))||PA(17:0/20:3(8Z,11Z,14Z))||PA(17:1(9Z)/20:2(11Z,14Z))||PA(17:2(9Z,12Z)/20:1(11Z))||PA(18:2(9Z,12Z)/19:1(9Z))||PA(18:3(6Z,9Z,12Z)/19:0)||PA(18:3(9Z,12Z,15Z)/19:0)||PA(19:0/18:3(6Z,9Z,12Z))||PA(19:0/18:3(9Z,12Z,15Z))||PA(19:1(9Z)/18:2(9Z,12Z))||PA(20:1(11Z)/17:2(9Z,12Z))||PA(20:2(11Z,14Z)/17:1(9Z))||PA(20:3(8Z,11Z,14Z)/17:0)||PA(22:2(13Z,16Z)/15:1(9Z))||PC(12:0/20:2(11Z,…	LMGP10010187||LMGP10010239||LMGP10010266||LMGP10010295||LMGP10010353||LMGP10010381||LMGP10010409||LMGP10010462||LMGP10010463||LMGP10010491||LMGP10010536||LMGP10010565||LMGP10010595||LMGP10010760||LMGP01011330||LMGP01010494||LMGP01010496||LMGP01011390||LMGP01011414||LMGP01011440||LMGP01010682||LMGP01010684||LMGP01011526||LMGP01011555||LMGP01011597||LMGP01011616||LMGP01011835||LMGP02010403||LMGP020…	-0.48||-0.48||-0.48||-0.48||-0.48||-0.48||-0.48||-0.48||-0.48||-0.48||-0.48||-0.48||-0.48||-0.48||-0.48||-0.48||-0.48||-0.48||-0.48||-0.48||-0.48||-0.48||-0.48||-0.48||-0.48||-0.48||-0.48||-0.48||-0.48||-0.48||-0.48||-0.48||-0.48||-0.48||-0.48||-0.48||-0.48||-0.48||-0.48||-0.48||-0.48||-3.72
731.606	C41H83N2O6P||C41H83N2O6P||C41H83N2O6P||C41H83N2O6P||C41H83N2O6P||C41H83N2O6P	[M+H]+||[M+H]+||[M+H]+||[M+H]+||[M+H]+||[M+H]+	PE-Cer(d14:1(4E)/25:0)||PE-Cer(d15:1(4E)/24:0)||PE-Cer(d16:1(4E)/23:0)||SM(d16:1/20:0)||SM(d18:0/18:1(9Z))||SM(d18:1/18:0)	LMSP03020013||LMSP03020018||LMSP03020025||LMSP03010052||LMSP03010031||LMSP03010001	-0.61||-0.61||-0.61||-0.61||-0.61||-0.61
732.553	C40H75O8P||C40H75O8P||C40H75O8P||C40H75O8P||C40H75O8P||C40H75O8P||C40H75O8P||C40H75O8P||C40H75O8P||C40H75O8P||C40H75O8P||C40H75O8P||C40H75O8P||C40H75O8P||C40H75O8P||C40H78NO8P||C40H78NO8P||C40H78NO8P||C40H78NO8P||C40H78NO8P||C40H78NO8P||C40H78NO8P||C40H78NO8P||C40H78NO8P||C40H78NO8P||C40H78NO8P||C40H78NO8P||C40H78NO8P||C40H78NO8P||C40H78NO8P||C40H78NO8P||C40H78NO8P||C40H78NO8P||C40H78NO8P||C40H78…	[M+NH4]+||[M+NH4]+||[M+NH4]+||[M+NH4]+||[M+NH4]+||[M+NH4]+||[M+NH4]+||[M+NH4]+||[M+NH4]+||[M+NH4]+||[M+NH4]+||[M+NH4]+||[M+NH4]+||[M+NH4]+||[M+NH4]+||[M+H]+||[M+H]+||[M+H]+||[M+H]+||[M+H]+||[M+H]+||[M+H]+||[M+H]+||[M+H]+||[M+H]+||[M+H]+||[M+H]+||[M+H]+||[M+H]+||[M+H]+||[M+H]+||[M+H]+||[M+H]+||[M+H]+||[M+H]+||[M+H]+||[M+H]+||[M+H]+||[M+H]+||[M+H]+||[M+H]+||[M+H]+||[M+H]+||[M+H]+||[M+H]+||[M+H]+||[…	1-tetradecanyl-2-(8-[3]-ladderane-octanyl)-sn-glycero-3-phospho-(1-sn-glycerol)||PA(15:0/22:2(13Z,16Z))||PA(15:1(9Z)/22:1(11Z))||PA(17:0/20:2(11Z,14Z))||PA(17:1(9Z)/20:1(11Z))||PA(17:2(9Z,12Z)/20:0)||PA(18:1(9Z)/19:1(9Z))||PA(18:2(9Z,12Z)/19:0)||PA(19:0/18:2(9Z,12Z))||PA(19:1(9Z)/18:1(9Z))||PA(20:0/17:2(9Z,12Z))||PA(20:1(11Z)/17:1(9Z))||PA(20:2(11Z,14Z)/17:0)||PA(22:1(11Z)/15:1(9Z))||PA(22:2(13Z,…	LMGP04040003||LMGP10010156||LMGP10010186||LMGP10010238||LMGP10010265||LMGP10010294||LMGP10010331||LMGP10010352||LMGP10010461||LMGP10010490||LMGP10010515||LMGP10010535||LMGP10010564||LMGP10010729||LMGP10010759||LMGP01011329||LMGP01011352||LMGP01010490||LMGP01010492||LMGP01011389||LMGP01011413||LMGP01011439||LMGP01010566||LMGP01011479||LMGP01011500||LMGP01011525||LMGP01011582||LMGP01012145||LMGP010…	-0.56||-0.56||-0.56||-0.56||-0.56||-0.56||-0.56||-0.56||-0.56||-0.56||-0.56||-0.56||-0.56||-0.56||-0.56||-0.57||-0.57||-0.57||-0.57||-0.57||-0.57||-0.57||-0.57||-0.57||-0.57||-0.57||-0.57||-0.57||-0.57||-0.57||-0.57||-0.57||-0.57||-0.57||-0.57||-0.57||-0.57||-0.57||-0.57||-0.57||-0.57||-0.57||-0.57||-0.57||-0.57||-0.57||-0.57||-0.57||-0.57||-0.57||-3.8
734.569	C40H77O8P||C40H77O8P||C40H77O8P||C40H77O8P||C40H77O8P||C40H77O8P||C40H77O8P||C40H77O8P||C40H77O8P||C40H77O8P||C40H77O8P||C40H77O8P||C40H77O8P||C40H77O8P||C40H80NO8P||C40H80NO8P||C40H80NO8P||C40H80NO8P||C40H80NO8P||C40H80NO8P||C40H80NO8P||C40H80NO8P||C40H80NO8P||C40H80NO8P||C40H80NO8P||C40H80NO8P||C40H80NO8P||C40H80NO8P||C40H80NO8P||C40H80NO8P||C40H80NO8P||C40H80NO8P||C40H80NO8P||C40H80NO8P||C40H8…	[M+NH4]+||[M+NH4]+||[M+NH4]+||[M+NH4]+||[M+NH4]+||[M+NH4]+||[M+NH4]+||[M+NH4]+||[M+NH4]+||[M+NH4]+||[M+NH4]+||[M+NH4]+||[M+NH4]+||[M+NH4]+||[M+H]+||[M+H]+||[M+H]+||[M+H]+||[M+H]+||[M+H]+||[M+H]+||[M+H]+||[M+H]+||[M+H]+||[M+H]+||[M+H]+||[M+H]+||[M+H]+||[M+H]+||[M+H]+||[M+H]+||[M+H]+||[M+H]+||[M+H]+||[M+H]+||[M+H]+||[M+H]+||[M+H]+||[M+H]+||[M+NH4]+||[M+NH4]+	PA(15:0/22:1(11Z))||PA(15:1(9Z)/22:0)||PA(16:1(9Z)/21:0)||PA(17:0/20:1(11Z))||PA(17:1(9Z)/20:0)||PA(18:0/19:1(9Z))||PA(18:1(9Z)/19:0)||PA(19:0/18:1(9Z))||PA(19:1(9Z)/18:0)||PA(20:0/17:1(9Z))||PA(20:1(11Z)/17:0)||PA(21:0/16:1(9Z))||PA(22:0/15:1(9Z))||PA(22:1(11Z)/15:0)||PC(10:0/22:0)||PC(11:0/21:0)||PC(12:0/20:0)||PC(13:0/19:0)||PC(14:0/18:0)||PC(15:0/17:0)||PC(16:0/16:0)||PC(17:0/15:0)||PC(18:0/1…	LMGP10010155||LMGP10010185||LMGP10010219||LMGP10010237||LMGP10010264||LMGP10010316||LMGP10010330||LMGP10010460||LMGP10010489||LMGP10010514||LMGP10010534||LMGP10010680||LMGP10010703||LMGP10010728||LMGP01010397||LMGP01010418||LMGP01010444||LMGP01010463||LMGP01010488||LMGP01010537||LMGP01010564||LMGP01010704||LMGP01010739||LMGP01010970||LMGP01010997||LMGP01011062||LMGP01011080||LMGP01011267||LMGP020…	-0.71||-0.71||-0.71||-0.71||-0.71||-0.71||-0.71||-0.71||-0.71||-0.71||-0.71||-0.71||-0.71||-0.71||-0.71||-0.71||-0.71||-0.71||-0.71||-0.71||-0.71||-0.71||-0.71||-0.71||-0.71||-0.71||-0.71||-0.71||-0.71||-0.71||-0.71||-0.71||-0.71||-0.71||-0.71||-0.71||-0.71||-0.71||-0.71||-3.93||-3.93
737.579	C39H78NO8P||C39H78NO8P||C39H78NO8P||C39H78NO8P||C39H78NO8P||C39H78NO8P||C39H78NO8P||C39H78NO8P||C39H78NO8P||C39H78NO8P||C39H78NO8P||C39H78NO8P||C39H78NO8P||C39H78NO8P||C39H78NO8P||C39H78NO8P||C39H78NO8P||C39H78NO8P||C39H78NO8P||C39H78NO8P||C39H78NO8P||C39H78NO8P||C39H78NO8P||C39H78NO8P||C39H78NO8P	[M+NH4]+||[M+NH4]+||[M+NH4]+||[M+NH4]+||[M+NH4]+||[M+NH4]+||[M+NH4]+||[M+NH4]+||[M+NH4]+||[M+NH4]+||[M+NH4]+||[M+NH4]+||[M+NH4]+||[M+NH4]+||[M+NH4]+||[M+NH4]+||[M+NH4]+||[M+NH4]+||[M+NH4]+||[M+NH4]+||[M+NH4]+||[M+NH4]+||[M+NH4]+||[M+NH4]+||[M+NH4]+	PC(10:0/21:0)||PC(11:0/20:0)||PC(12:0/19:0)||PC(13:0/18:0)||PC(14:0/17:0)||PC(15:0/16:0)||PC(16:0/15:0)||PC(17:0/14:0)||PC(18:0/13:0)||PC(19:0/12:0)||PC(20:0/11:0)||PC(21:0/10:0)||PC(9:0/22:0)||PE(12:0/22:0)||PE(13:0/21:0)||PE(14:0/20:0)||PE(15:0/19:0)||PE(16:0/18:0)||PE(17:0/17:0)||PE(18:0/16:0)||PE(19:0/15:0)||PE(20:0/14:0)||PE(21:0/13:0)||PE(22:0/12:0)||PE-NMe2(16:0/16:0)	LMGP01010396||LMGP01010417||LMGP01011327||LMGP01011346||LMGP01011366||LMGP01010532||LMGP01010562||LMGP01011499||LMGP01011581||LMGP01010967||LMGP01010996||LMGP01011061||LMGP01011266||LMGP02011258||LMGP02011252||LMGP02011243||LMGP02011231||LMGP02011225||LMGP02011213||LMGP02011205||LMGP02011185||LMGP02011180||LMGP02011169||LMGP02011165||LMGP02010325	-2.41||-2.41||-2.41||-2.41||-2.41||-2.41||-2.41||-2.41||-2.41||-2.41||-2.41||-2.41||-2.41||-2.41||-2.41||-2.41||-2.41||-2.41||-2.41||-2.41||-2.41||-2.41||-2.41||-2.41||-2.41
738.454	C36H65O12P	[M+NH4]+	OHODA-PG	LMGP20060035	-0.98
739.487	C36H68NO11P||C39H73O9P||C46H68O6||C46H68O6	[M+NH4]+||[M+Na]+||[M+Na]+||[M+Na]+	PHDdiA-PC||PG(P-16:0/17:2(9Z,12Z))||1-OH-gamma-carotene glucoside/ (Carotenoids B-G)||Rhodopin beta-D-glucoside/ Rhodopin glucoside	LMGP20010018||LMGP04030011||LMPR01070168||LMPR01070130	0.58||-1.61||-4.81||-4.81
739.572	C40H81N2O6P||C40H81N2O6P||C40H81N2O6P||C40H81N2O6P	[M+Na]+||[M+Na]+||[M+Na]+||[M+Na]+	PE-Cer(d14:1(4E)/24:0)||PE-Cer(d16:1(4E)/22:0)||SM(d18:1/17:0)||SM(d19:1/16:0)	LMSP03020011||LMSP03020024||LMSP03010044||LMSP03010045	-0.63||-0.63||-0.63||-0.63
740.522	C41H71O8P||C41H71O8P||C41H71O8P||C41H71O8P||C41H71O8P||C41H71O8P||C41H71O8P||C41H71O8P||C41H71O8P||C41H71O8P||C41H71O8P||C41H71O8P||C41H71O8P||C41H71O8P||C41H74NO8P||C41H74NO8P||C41H74NO8P||C41H74NO8P||C41H74NO8P||C41H74NO8P||C41H74NO8P||C41H74NO8P||C41H74NO8P||C41H74NO8P||C41H74NO8P||C41H74NO8P||C41H74NO8P||C41H74NO8P||C41H74NO8P||C41H74NO8P||C41H74NO8P||C41H74NO8P||C41H74NO8P||C41H74NO8P||C41H7…	[M+NH4]+||[M+NH4]+||[M+NH4]+||[M+NH4]+||[M+NH4]+||[M+NH4]+||[M+NH4]+||[M+NH4]+||[M+NH4]+||[M+NH4]+||[M+NH4]+||[M+NH4]+||[M+NH4]+||[M+NH4]+||[M+H]+||[M+H]+||[M+H]+||[M+H]+||[M+H]+||[M+H]+||[M+H]+||[M+H]+||[M+H]+||[M+H]+||[M+H]+||[M+H]+||[M+H]+||[M+H]+||[M+H]+||[M+H]+||[M+H]+||[M+H]+||[M+H]+||[M+H]+||[M+H]+||[M+H]+||[M+H]+||[M+H]+||[M+H]+||[M+Na]+||[M+Na]+||[M+Na]+||[M+Na]+||[M+Na]+||[M+Na]+||[M+Na…	PA(16:1(9Z)/22:4(7Z,10Z,13Z,16Z))||PA(18:0/20:5(5Z,8Z,11Z,14Z,17Z))||PA(18:1(9Z)/20:4(5Z,8Z,11Z,14Z))||PA(18:2(9Z,12Z)/20:3(8Z,11Z,14Z))||PA(18:3(6Z,9Z,12Z)/20:2(11Z,14Z))||PA(18:3(9Z,12Z,15Z)/20:2(11Z,14Z))||PA(18:4(6Z,9Z,12Z,15Z)/20:1(11Z))||PA(20:1(11Z)/18:4(6Z,9Z,12Z,15Z))||PA(20:2(11Z,14Z)/18:3(6Z,9Z,12Z))||PA(20:2(11Z,14Z)/18:3(9Z,12Z,15Z))||PA(20:3(8Z,11Z,14Z)/18:2(9Z,12Z))||PA(20:4(5Z,8Z,…	LMGP10010223||LMGP10010884||LMGP10010879||LMGP10010357||LMGP10010385||LMGP10010413||LMGP10010443||LMGP10010542||LMGP10010570||LMGP10010571||LMGP10010600||LMGP10010629||LMGP10010658||LMGP10010793||LMGP01011356||LMGP01011418||LMGP01011445||LMGP01011446||LMGP01011645||LMGP01011676||LMGP01011704||LMGP01011898||LMGP02010421||LMGP02010096||LMGP02010532||LMGP02011203||LMGP02010643||LMGP02011197||LMGP020…	-0.78||-0.78||-0.78||-0.78||-0.78||-0.78||-0.78||-0.78||-0.78||-0.78||-0.78||-0.78||-0.78||-0.78||-0.78||-0.78||-0.78||-0.78||-0.78||-0.78||-0.78||-0.78||-0.78||-0.78||-0.78||-0.78||-0.78||-0.78||-0.78||-0.78||-0.78||-0.78||-0.78||-0.78||-0.78||-0.78||-0.78||-0.78||-0.78||2.46||2.46||2.46||2.46||2.46||2.46||2.46||2.46||2.46||2.46||2.46||2.46||2.46||2.46||2.46||2.46||2.46||2.46||2.46||2.46||2.46||…
741.474	C40H69O10P||C40H69O10P||C40H69O10P||C40H69O10P||C40H69O10P||C40H69O10P	[M+H]+||[M+H]+||[M+H]+||[M+H]+||[M+H]+||[M+H]+	PG(14:0/20:5(5Z,8Z,11Z,14Z,17Z))||PG(14:1(9Z)/20:4(5Z,8Z,11Z,14Z))||PG(16:1(9Z)/18:4(6Z,9Z,12Z,15Z))||PG(18:4(6Z,9Z,12Z,15Z)/16:1(9Z))||PG(20:4(5Z,8Z,11Z,14Z)/14:1(9Z))||PG(20:5(5Z,8Z,11Z,14Z,17Z)/14:0)	LMGP04010923||LMGP04010131||LMGP04010900||LMGP04010432||LMGP04010623||LMGP04010650	4.62||4.62||4.62||4.62||4.62||4.62
742.574	C42H80NO7P||C42H80NO7P||C42H80NO7P||C42H80NO7P||C42H80NO7P||C42H80NO7P||C42H80NO7P||C40H82NO7P||C40H82NO7P||C40H82NO7P||C40H82NO7P||C40H82NO7P||C40H82NO7P||C40H82NO7P	[M+H]+||[M+H]+||[M+H]+||[M+H]+||[M+H]+||[M+H]+||[M+H]+||[M+Na]+||[M+Na]+||[M+Na]+||[M+Na]+||[M+Na]+||[M+Na]+||[M+Na]+	PC(O-16:0/18:3(6Z,9Z,12Z))||PC(O-16:0/18:3(9Z,12Z,15Z))||PC(O-16:1(9Z)/18:2(9Z,12Z))||PC(P-16:0/18:2(9Z,12Z))||PC(P-18:1(11Z)/16:1(9Z))||PC(P-18:1(9Z)/16:1(9Z))||PE(P-20:0/17:2(9Z,12Z))||PC(O-14:0/18:0)||PC(O-16:0/16:0)||PC(O-18:0/14:0)||PC(O-20:0/12:0)||PE(O-16:0/19:0)||PE(O-18:0/17:0)||PE(O-20:0/15:0)	LMGP01020041||LMGP01020042||LMGP01020257||LMGP01030008||LMGP01030135||LMGP01030145||LMGP02030072||LMGP01020015||LMGP01020029||LMGP01020195||LMGP01020216||LMGP02020097||LMGP02020044||LMGP02020065	-0.7||-0.7||-0.7||-0.7||-0.7||-0.7||-0.7||2.54||2.54||2.54||2.54||2.54||2.54||2.54
743.46	C38H64NO10P||C38H64NO10P||C38H64NO10P||C38H64NO10P||C41H69O8P||C41H69O8P||C41H69O8P||C41H69O8P||C41H69O8P||C41H69O8P||C41H69O8P||C41H69O8P||C41H69O8P||C41H69O8P||C41H69O8P||C41H69O8P	[M+NH4]+||[M+NH4]+||[M+NH4]+||[M+NH4]+||[M+Na]+||[M+Na]+||[M+Na]+||[M+Na]+||[M+Na]+||[M+Na]+||[M+Na]+||[M+Na]+||[M+Na]+||[M+Na]+||[M+Na]+||[M+Na]+	PS(12:0/20:5(5Z,8Z,11Z,14Z,17Z))||PS(14:1(9Z)/18:4(6Z,9Z,12Z,15Z))||PS(18:4(6Z,9Z,12Z,15Z)/14:1(9Z))||PS(20:5(5Z,8Z,11Z,14Z,17Z)/12:0)||PA(16:0/22:6(4Z,7Z,10Z,13Z,16Z,19Z))||PA(18:1(9Z)/20:5(5Z,8Z,11Z,14Z,17Z))||PA(18:2(9Z,12Z)/20:4(5Z,8Z,11Z,14Z))||PA(18:3(6Z,9Z,12Z)/20:3(8Z,11Z,14Z))||PA(18:3(9Z,12Z,15Z)/20:3(8Z,11Z,14Z))||PA(18:4(6Z,9Z,12Z,15Z)/20:2(11Z,14Z))||PA(20:2(11Z,14Z)/18:4(6Z,9Z,12Z,1…	LMGP03010063||LMGP03010124||LMGP03010428||LMGP03010648||LMGP10010038||LMGP10010878||LMGP10010875||LMGP10010386||LMGP10010414||LMGP10010444||LMGP10010572||LMGP10010601||LMGP10010602||LMGP10010630||LMGP10010856||LMGP10010845	-0.44||-0.44||-0.44||-0.44||-2.62||-2.62||-2.62||-2.62||-2.62||-2.62||-2.62||-2.62||-2.62||-2.62||-2.62||-2.62
744.494	C41H72NO7P||C43H70NO7P	[M+Na]+||[M+H]+	PE(P-16:0/20:5(5Z,8Z,11Z,14Z,17Z))||1-(6-[5]-ladderane-hexanoyl)-2-(8-[3]-ladderane-octanyl)-sn-glycerophosphoethanolamine	LMGP02030028||LMGP02080001	-0.39||-3.62
744.553	C41H75O8P||C41H75O8P||C41H75O8P||C41H75O8P||C41H75O8P||C41H75O8P||C41H75O8P||C41H75O8P||C41H75O8P||C41H75O8P||C41H75O8P||C41H75O8P||C41H78NO8P||C41H78NO8P||C41H78NO8P||C41H78NO8P||C41H78NO8P||C41H78NO8P||C41H78NO8P||C41H78NO8P||C41H78NO8P||C41H78NO8P||C41H78NO8P||C41H78NO8P||C41H78NO8P||C41H78NO8P||C41H78NO8P||C41H78NO8P||C41H78NO8P||C41H78NO8P||C41H78NO8P||C41H78NO8P||C41H78NO8P||C41H78NO8P||C41…	[M+NH4]+||[M+NH4]+||[M+NH4]+||[M+NH4]+||[M+NH4]+||[M+NH4]+||[M+NH4]+||[M+NH4]+||[M+NH4]+||[M+NH4]+||[M+NH4]+||[M+NH4]+||[M+H]+||[M+H]+||[M+H]+||[M+H]+||[M+H]+||[M+H]+||[M+H]+||[M+H]+||[M+H]+||[M+H]+||[M+H]+||[M+H]+||[M+H]+||[M+H]+||[M+H]+||[M+H]+||[M+H]+||[M+H]+||[M+H]+||[M+H]+||[M+H]+||[M+H]+||[M+H]+||[M+H]+||[M+H]+||[M+H]+||[M+H]+||[M+H]+||[M+H]+||[M+H]+	PA(16:1(9Z)/22:2(13Z,16Z))||PA(18:0/20:3(8Z,11Z,14Z))||PA(18:1(9Z)/20:2(11Z,14Z))||PA(18:2(9Z,12Z)/20:1(11Z))||PA(18:3(6Z,9Z,12Z)/20:0)||PA(18:3(9Z,12Z,15Z)/20:0)||PA(20:0/18:3(6Z,9Z,12Z))||PA(20:0/18:3(9Z,12Z,15Z))||PA(20:1(11Z)/18:2(9Z,12Z))||PA(20:2(11Z,14Z)/18:1(9Z))||PA(20:3(8Z,11Z,14Z)/18:0)||PA(22:2(13Z,16Z)/16:1(9Z))||PC(13:0/20:2(11Z,14Z))||PC(14:1(9Z)/19:1(9Z))||PC(15:0/18:2(9Z,12Z))||P…	LMGP10010222||LMGP10010885||LMGP10010332||LMGP10010355||LMGP10010383||LMGP10010411||LMGP10010516||LMGP10010517||LMGP10010539||LMGP10010568||LMGP10010598||LMGP10010762||LMGP01011354||LMGP01011396||LMGP01010543||LMGP01011443||LMGP01011465||LMGP01011481||LMGP01011528||LMGP01011557||LMGP01011599||LMGP01011618||LMGP01011759||LMGP01011836||LMGP02010420||LMGP02010448||LMGP02010510||LMGP02010530||LMGP020…	-0.58||-0.58||-0.58||-0.58||-0.58||-0.58||-0.58||-0.58||-0.58||-0.58||-0.58||-0.58||-0.58||-0.58||-0.58||-0.58||-0.58||-0.58||-0.58||-0.58||-0.58||-0.58||-0.58||-0.58||-0.58||-0.58||-0.58||-0.58||-0.58||-0.58||-0.58||-0.58||-0.58||-0.58||-0.58||-0.58||-0.58||-0.58||-0.58||-0.58||-0.58||-0.58
745.477	C38H66NO10P||C38H66NO10P||C38H66NO10P||C38H66NO10P||C38H66NO10P||C38H66NO10P||C38H66NO10P||C38H66NO10P||C41H71O8P||C41H71O8P||C41H71O8P||C41H71O8P||C41H71O8P||C41H71O8P||C41H71O8P||C41H71O8P||C41H71O8P||C41H71O8P||C41H71O8P||C41H71O8P||C41H71O8P||C41H71O8P||C43H69O8P||C43H69O8P||C43H69O8P||C43H69O8P||C43H69O8P||C43H69O8P||C43H69O8P	[M+NH4]+||[M+NH4]+||[M+NH4]+||[M+NH4]+||[M+NH4]+||[M+NH4]+||[M+NH4]+||[M+NH4]+||[M+Na]+||[M+Na]+||[M+Na]+||[M+Na]+||[M+Na]+||[M+Na]+||[M+Na]+||[M+Na]+||[M+Na]+||[M+Na]+||[M+Na]+||[M+Na]+||[M+Na]+||[M+Na]+||[M+H]+||[M+H]+||[M+H]+||[M+H]+||[M+H]+||[M+H]+||[M+H]+	PS(12:0/20:4(5Z,8Z,11Z,14Z))||PS(14:0/18:4(6Z,9Z,12Z,15Z))||PS(14:1(9Z)/18:3(6Z,9Z,12Z))||PS(14:1(9Z)/18:3(9Z,12Z,15Z))||PS(18:3(6Z,9Z,12Z)/14:1(9Z))||PS(18:3(9Z,12Z,15Z)/14:1(9Z))||PS(18:4(6Z,9Z,12Z,15Z)/14:0)||PS(20:4(5Z,8Z,11Z,14Z)/12:0)||PA(16:1(9Z)/22:4(7Z,10Z,13Z,16Z))||PA(18:0/20:5(5Z,8Z,11Z,14Z,17Z))||PA(18:1(9Z)/20:4(5Z,8Z,11Z,14Z))||PA(18:2(9Z,12Z)/20:3(8Z,11Z,14Z))||PA(18:3(6Z,9Z,12Z)/…	LMGP03010062||LMGP03010925||LMGP03010122||LMGP03010123||LMGP03010369||LMGP03010400||LMGP03010427||LMGP03010620||LMGP10010223||LMGP10010884||LMGP10010879||LMGP10010357||LMGP10010385||LMGP10010413||LMGP10010443||LMGP10010542||LMGP10010570||LMGP10010571||LMGP10010600||LMGP10010629||LMGP10010658||LMGP10010793||LMGP10010874||LMGP10010452||LMGP10010611||LMGP10010857||LMGP10010668||LMGP10010802||LMGP100…	0.9||0.9||0.9||0.9||0.9||0.9||0.9||0.9||-1.27||-1.27||-1.27||-1.27||-1.27||-1.27||-1.27||-1.27||-1.27||-1.27||-1.27||-1.27||-1.27||-1.27||-4.5||-4.5||-4.5||-4.5||-4.5||-4.5||-4.5
745.497	C38H75O10P||C38H75O10P||C38H75O10P||C38H75O10P||C38H75O10P||C38H75O10P||C38H75O10P||C38H75O10P||C38H75O10P	[M+Na]+||[M+Na]+||[M+Na]+||[M+Na]+||[M+Na]+||[M+Na]+||[M+Na]+||[M+Na]+||[M+Na]+	PG(12:0/20:0)||PG(13:0/19:0)||PG(14:0/18:0)||PG(15:0/17:0)||PG(16:0/16:0)||PG(17:0/15:0)||PG(18:0/14:0)||PG(19:0/13:0)||PG(20:0/12:0)	LMGP04010940||LMGP04010935||LMGP04010929||LMGP04010916||LMGP04010986||LMGP04010896||LMGP04010027||LMGP04010872||LMGP04010867	-3.17||-3.17||-3.17||-3.17||-3.17||-3.17||-3.17||-3.17||-3.17
745.593	C41H77NO9||C41H77NO9||C41H77NO9||C41H77NO9	[M+NH4]+||[M+NH4]+||[M+NH4]+||[M+NH4]+	Chrysogeside E||GlcCer(d15:2(4E,6E)/20:0(2OH))||GlcCer(d18:2(4E,8Z)/17:0(2OH[R]))||N-(2R-hydroxy-hexadecanoyl)-1-beta-glucosyl-9-methyl-sphing-4E,8E-dienine	LMSP05010093||LMSP0501AA74||LMSP05010049||LMSP05010113	-0.92||-0.92||-0.92||-0.92
746.509	C41H74NO7P||C41H74NO7P||C41H74NO7P||C43H72NO7P	[M+Na]+||[M+Na]+||[M+Na]+||[M+H]+	PE(O-16:0/20:5(5Z,8Z,11Z,14Z,17Z))||PE(P-16:0/20:4(5Z,8Z,11Z,14Z))||PE(P-18:0/18:4(6Z,9Z,12Z,15Z))||1-(6-[3]-ladderane-hexanoyl)-2-(8-[3]-ladderane-octanyl)-sn-glycerophosphoethanolamine	LMGP02020095||LMGP02030093||LMGP02030049||LMGP02080008	-0.74||-0.74||-0.74||-3.96
746.569	C41H77O8P||C41H77O8P||C41H77O8P||C41H77O8P||C41H77O8P||C41H77O8P||C41H77O8P||C41H77O8P||C41H77O8P||C41H77O8P||C41H77O8P||C41H77O8P||C41H77O8P||C41H80NO8P||C41H80NO8P||C41H80NO8P||C41H80NO8P||C41H80NO8P||C41H80NO8P||C41H80NO8P||C41H80NO8P||C41H80NO8P||C41H80NO8P||C41H80NO8P||C41H80NO8P||C41H80NO8P||C41H80NO8P||C41H80NO8P||C41H80NO8P||C41H80NO8P||C41H80NO8P||C41H80NO8P||C41H80NO8P||C41H80NO8P||C41H…	[M+NH4]+||[M+NH4]+||[M+NH4]+||[M+NH4]+||[M+NH4]+||[M+NH4]+||[M+NH4]+||[M+NH4]+||[M+NH4]+||[M+NH4]+||[M+NH4]+||[M+NH4]+||[M+NH4]+||[M+H]+||[M+H]+||[M+H]+||[M+H]+||[M+H]+||[M+H]+||[M+H]+||[M+H]+||[M+H]+||[M+H]+||[M+H]+||[M+H]+||[M+H]+||[M+H]+||[M+H]+||[M+H]+||[M+H]+||[M+H]+||[M+H]+||[M+H]+||[M+H]+||[M+H]+||[M+H]+||[M+H]+||[M+H]+||[M+H]+||[M+H]+||[M+H]+||[M+H]+||[M+H]+||[M+H]+||[M+H]+||[M+H]+||[M+H]+	PA(16:0/22:2(13Z,16Z))||PA(16:1(9Z)/22:1(11Z))||PA(17:2(9Z,12Z)/21:0)||PA(18:0/20:2(11Z,14Z))||PA(18:1(9Z)/20:1(11Z))||PA(18:2(9Z,12Z)/20:0)||PA(19:1(9Z)/19:1(9Z))||PA(20:0/18:2(9Z,12Z))||PA(20:1(11Z)/18:1(9Z))||PA(20:2(11Z,14Z)/18:0)||PA(21:0/17:2(9Z,12Z))||PA(22:1(11Z)/16:1(9Z))||PA(22:2(13Z,16Z)/16:0)||PC(13:0/20:1(11Z))||PC(14:0/19:1(9Z))||PC(14:1(9Z)/19:0)||PC(15:0/18:1(11Z))||PC(15:0/18:1(9…	LMGP10010198||LMGP10010221||LMGP10010300||LMGP10010965||LMGP10010959||LMGP10010354||LMGP10010496||LMGP10010952||LMGP10010538||LMGP10010567||LMGP10010683||LMGP10010731||LMGP10010761||LMGP01011353||LMGP01011371||LMGP01011395||LMGP01010541||LMGP01011415||LMGP01011442||LMGP01010571||LMGP01011480||LMGP01011502||LMGP01011527||LMGP01011584||LMGP01011598||LMGP01011731||LMGP01011758||LMGP01011806||LMGP020…	-0.82||-0.82||-0.82||-0.82||-0.82||-0.82||-0.82||-0.82||-0.82||-0.82||-0.82||-0.82||-0.82||-0.83||-0.83||-0.83||-0.83||-0.83||-0.83||-0.83||-0.83||-0.83||-0.83||-0.83||-0.83||-0.83||-0.83||-0.83||-0.83||-0.83||-0.83||-0.83||-0.83||-0.83||-0.83||-0.83||-0.83||-0.83||-0.83||-0.83||-0.83||-0.83||-0.83||-0.83||-0.83||-0.83||-0.83
746.605	C42H81O7P||C42H84NO7P||C42H84NO7P||C42H84NO7P||C42H84NO7P||C42H84NO7P||C42H84NO7P||C42H84NO7P||C42H84NO7P||C42H84NO7P||C42H84NO7P||C42H84NO7P||C42H84NO7P||C42H84NO7P||C42H84NO7P	[M+NH4]+||[M+H]+||[M+H]+||[M+H]+||[M+H]+||[M+H]+||[M+H]+||[M+H]+||[M+H]+||[M+H]+||[M+H]+||[M+H]+||[M+H]+||[M+H]+||[M+H]+	PA(P-20:0/19:1(9Z))||PC(O-16:0/18:1(9Z))||PC(O-16:1(9Z)/18:0)||PC(O-18:0/16:1(9Z))||PC(O-18:1(11Z)/16:0)||PC(O-18:1(9Z)/16:0)||PC(O-20:0/14:1(9Z))||PC(P-16:0/18:0)||PC(P-18:0/16:0)||PC(P-20:0/14:0)||PE(O-18:0/19:1(9Z))||PE(O-20:0/17:1(9Z))||PE(P-16:0/21:0)||PE(P-18:0/19:0)||PE(P-20:0/17:0)	LMGP10030074||LMGP01020003||LMGP01020256||LMGP01020089||LMGP01020261||LMGP01020152||LMGP01020219||LMGP01030030||LMGP01030052||LMGP01030076||LMGP02020053||LMGP02020069||LMGP02030029||LMGP02030050||LMGP02030070	-0.88||-0.88||-0.88||-0.88||-0.88||-0.88||-0.88||-0.88||-0.88||-0.88||-0.88||-0.88||-0.88||-0.88||-0.88
747.493	C41H73O8P||C41H73O8P||C41H73O8P||C41H73O8P||C41H73O8P||C41H73O8P||C41H73O8P||C41H73O8P||C41H73O8P||C41H73O8P||C41H73O8P||C41H73O8P||C41H73O8P||C41H73O8P||C38H68NO10P||C38H68NO10P||C38H68NO10P||C38H68NO10P||C38H68NO10P||C38H68NO10P||C38H68NO10P||C38H68NO10P||C38H68NO10P||C38H68NO10P||C38H68NO10P||C43H71O8P||C43H71O8P||C43H71O8P||C43H71O8P||C43H71O8P||C43H71O8P||C43H71O8P||C43H71O8P||C43H71O8P||C43…	[M+Na]+||[M+Na]+||[M+Na]+||[M+Na]+||[M+Na]+||[M+Na]+||[M+Na]+||[M+Na]+||[M+Na]+||[M+Na]+||[M+Na]+||[M+Na]+||[M+Na]+||[M+Na]+||[M+NH4]+||[M+NH4]+||[M+NH4]+||[M+NH4]+||[M+NH4]+||[M+NH4]+||[M+NH4]+||[M+NH4]+||[M+NH4]+||[M+NH4]+||[M+NH4]+||[M+H]+||[M+H]+||[M+H]+||[M+H]+||[M+H]+||[M+H]+||[M+H]+||[M+H]+||[M+H]+||[M+H]+	PA(16:0/22:4(7Z,10Z,13Z,16Z))||PA(18:0/20:4(5Z,8Z,11Z,14Z))||PA(18:1(9Z)/20:3(8Z,11Z,14Z))||PA(18:2(9Z,12Z)/20:2(11Z,14Z))||PA(18:3(6Z,9Z,12Z)/20:1(11Z))||PA(18:3(9Z,12Z,15Z)/20:1(11Z))||PA(18:4(6Z,9Z,12Z,15Z)/20:0)||PA(20:0/18:4(6Z,9Z,12Z,15Z))||PA(20:1(11Z)/18:3(6Z,9Z,12Z))||PA(20:1(11Z)/18:3(9Z,12Z,15Z))||PA(20:2(11Z,14Z)/18:2(9Z,12Z))||PA(20:3(8Z,11Z,14Z)/18:1(9Z))||PA(20:4(5Z,8Z,11Z,14Z)/18:…	LMGP10010970||LMGP10010024||LMGP10010333||LMGP10010356||LMGP10010384||LMGP10010412||LMGP10010442||LMGP10010951||LMGP10010540||LMGP10010541||LMGP10010569||LMGP10010599||LMGP10010628||LMGP10010792||LMGP20010039||LMGP03010061||LMGP03010099||LMGP03010926||LMGP03010121||LMGP03010171||LMGP03010283||LMGP03010343||LMGP03010368||LMGP03010399||LMGP03010589||LMGP10010040||LMGP10010393||LMGP10010421||LMGP100…	-0.71||-0.71||-0.71||-0.71||-0.71||-0.71||-0.71||-0.71||-0.71||-0.71||-0.71||-0.71||-0.71||-0.71||1.46||1.46||1.46||1.46||1.46||1.46||1.46||1.46||1.46||1.46||1.46||-3.93||-3.93||-3.93||-3.93||-3.93||-3.93||-3.93||-3.93||-3.93||-3.93
748.561	C42H80NO6P	[M+Na]+	1-tetradecanyl-2-(8-[3]-ladderane-octanyl)-sn-glycerophosphocholine	LMGP01040094	-1.27
749.439	C39H67O10P||C39H67O10P||C39H67O10P||C39H67O10P	[M+Na]+||[M+Na]+||[M+Na]+||[M+Na]+	PG(13:0/20:5(5Z,8Z,11Z,14Z,17Z))||PG(15:1(9Z)/18:4(6Z,9Z,12Z,15Z))||PG(18:4(6Z,9Z,12Z,15Z)/15:1(9Z))||PG(20:5(5Z,8Z,11Z,14Z,17Z)/13:0)	LMGP04010087||LMGP04010177||LMGP04010430||LMGP04010649	2.99||2.99||2.99||2.99
749.509	C41H75O8P||C41H75O8P||C41H75O8P||C41H75O8P||C41H75O8P||C41H75O8P||C41H75O8P||C41H75O8P||C41H75O8P||C41H75O8P||C41H75O8P||C41H75O8P||C38H70NO10P||C38H70NO10P||C38H70NO10P||C38H70NO10P||C38H70NO10P||C38H70NO10P||C38H70NO10P||C38H70NO10P||C38H70NO10P||C38H70NO10P||C38H70NO10P||C38H70NO10P||C43H73O8P||C43H73O8P||C43H73O8P||C43H73O8P||C43H73O8P||C43H73O8P||C43H73O8P||C43H73O8P||C43H73O8P||C43H73O8P||C…	[M+Na]+||[M+Na]+||[M+Na]+||[M+Na]+||[M+Na]+||[M+Na]+||[M+Na]+||[M+Na]+||[M+Na]+||[M+Na]+||[M+Na]+||[M+Na]+||[M+NH4]+||[M+NH4]+||[M+NH4]+||[M+NH4]+||[M+NH4]+||[M+NH4]+||[M+NH4]+||[M+NH4]+||[M+NH4]+||[M+NH4]+||[M+NH4]+||[M+NH4]+||[M+H]+||[M+H]+||[M+H]+||[M+H]+||[M+H]+||[M+H]+||[M+H]+||[M+H]+||[M+H]+||[M+H]+||[M+H]+	PA(16:1(9Z)/22:2(13Z,16Z))||PA(18:0/20:3(8Z,11Z,14Z))||PA(18:1(9Z)/20:2(11Z,14Z))||PA(18:2(9Z,12Z)/20:1(11Z))||PA(18:3(6Z,9Z,12Z)/20:0)||PA(18:3(9Z,12Z,15Z)/20:0)||PA(20:0/18:3(6Z,9Z,12Z))||PA(20:0/18:3(9Z,12Z,15Z))||PA(20:1(11Z)/18:2(9Z,12Z))||PA(20:2(11Z,14Z)/18:1(9Z))||PA(20:3(8Z,11Z,14Z)/18:0)||PA(22:2(13Z,16Z)/16:1(9Z))||OHODA-PC||PS(12:0/20:2(11Z,14Z))||PS(14:0/18:2(9Z,12Z))||PS(14:1(9Z)/18…	LMGP10010222||LMGP10010885||LMGP10010332||LMGP10010355||LMGP10010383||LMGP10010411||LMGP10010516||LMGP10010517||LMGP10010539||LMGP10010568||LMGP10010598||LMGP10010762||LMGP20010041||LMGP03010060||LMGP03010927||LMGP03010120||LMGP03010144||LMGP03010170||LMGP03010964||LMGP03010253||LMGP03010282||LMGP03010324||LMGP03010342||LMGP03010558||LMGP10010039||LMGP10010363||LMGP10010451||LMGP10010549||LMGP100…	-0.7||-0.7||-0.7||-0.7||-0.7||-0.7||-0.7||-0.7||-0.7||-0.7||-0.7||-0.7||1.46||1.46||1.46||1.46||1.46||1.46||1.46||1.46||1.46||1.46||1.46||1.46||-3.91||-3.91||-3.91||-3.91||-3.91||-3.91||-3.91||-3.91||-3.91||-3.91||-3.91
749.588	C40H77NO10	[M+NH4]+	GlcCer(t18:1(8Z)/16:0(2OH[S]))	LMSP05010042	-0.92
750.543	C43H73O7P||C43H76NO7P||C43H76NO7P||C41H78NO7P||C41H78NO7P||C41H78NO7P||C41H78NO7P||C41H78NO7P||C41H78NO7P	[M+NH4]+||[M+H]+||[M+H]+||[M+Na]+||[M+Na]+||[M+Na]+||[M+Na]+||[M+Na]+||[M+Na]+	PA(P-18:0/22:6(4Z,7Z,10Z,13Z,16Z,19Z))||PE(O-16:0/22:6(4Z,7Z,10Z,13Z,16Z,19Z))||PE(P-18:0/20:5(5Z,8Z,11Z,14Z,17Z))||PC(P-16:0/17:2(9Z,12Z))||PE(O-16:0/20:3(8Z,11Z,14Z))||PE(O-18:0/18:3(6Z,9Z,12Z))||PE(O-18:0/18:3(9Z,12Z,15Z))||PE(P-16:0/20:2(11Z,14Z))||PE(P-18:0/18:2(9Z,12Z))	LMGP10030090||LMGP02020020||LMGP02030056||LMGP01030029||LMGP02020096||LMGP02020049||LMGP02020050||LMGP02030026||LMGP02030046	-0.69||-0.69||-0.69||2.51||2.51||2.51||2.51||2.51||2.51
751.619	C47H84O5||C47H84O5||C47H84O5	[M+Na]+||[M+Na]+||[M+Na]+	DG(22:0/22:4(7Z,10Z,13Z,16Z)/0:0)[iso2]||DG(22:1(13Z)/22:3(10Z,13Z,16Z)/0:0)[iso2]||DG(22:2(13Z,16Z)/22:2(13Z,16Z)/0:0)	LMGL02010284||LMGL02010277||LMGL02010291	-2.51||-2.51||-2.51
752.519	C40H76NO8P||C40H76NO8P||C40H76NO8P||C40H76NO8P||C40H76NO8P||C40H76NO8P||C40H76NO8P||C40H76NO8P||C40H76NO8P||C40H76NO8P||C40H76NO8P||C40H76NO8P||C40H76NO8P||C40H76NO8P||C40H76NO8P||C40H76NO8P||C40H76NO8P||C40H76NO8P||C40H76NO8P||C40H76NO8P||C40H76NO8P||C40H76NO8P||C40H76NO8P||C40H76NO8P||C40H76NO8P||C40H76NO8P||C40H76NO8P||C42H71O8P||C42H71O8P||C42H71O8P||C42H71O8P||C42H71O8P||C42H71O8P||C42H74NO8…	[M+Na]+||[M+Na]+||[M+Na]+||[M+Na]+||[M+Na]+||[M+Na]+||[M+Na]+||[M+Na]+||[M+Na]+||[M+Na]+||[M+Na]+||[M+Na]+||[M+Na]+||[M+Na]+||[M+Na]+||[M+Na]+||[M+Na]+||[M+Na]+||[M+Na]+||[M+Na]+||[M+Na]+||[M+Na]+||[M+Na]+||[M+Na]+||[M+Na]+||[M+Na]+||[M+Na]+||[M+NH4]+||[M+NH4]+||[M+NH4]+||[M+NH4]+||[M+NH4]+||[M+NH4]+||[M+H]+||[M+H]+||[M+H]+||[M+H]+||[M+H]+||[M+H]+||[M+H]+||[M+H]+||[M+H]+||[M+H]+||[M+H]+||[M+H]+||…	PC(12:0/20:2(11Z,14Z))||PC(14:0/18:2(11Z,14Z))||PC(14:0/18:2(9Z,12Z))||PC(14:1(9Z)/18:1(9Z))||PC(15:0/17:2(9Z,12Z))||PC(15:1(9Z)/17:1(9Z))||PC(16:1(9E)/16:1(9E))||PC(16:1(9Z)/16:1(9Z))||PC(17:1(9Z)/15:1(9Z))||PC(17:2(9Z,12Z)/15:0)||PC(18:1(9Z)/14:1(9Z))||PC(18:2(9Z,12Z)/14:0)||PC(20:2(11Z,14Z)/12:0)||PE(13:0/22:2(13Z,16Z))||PE(15:0/20:2(11Z,14Z))||PE(15:1(9Z)/20:1(11Z))||PE(16:1(9Z)/19:1(9Z))||PE…	LMGP01011330||LMGP01010494||LMGP01010496||LMGP01011390||LMGP01011414||LMGP01011440||LMGP01010682||LMGP01010684||LMGP01011526||LMGP01011555||LMGP01011597||LMGP01011616||LMGP01011835||LMGP02010403||LMGP02010465||LMGP02010494||LMGP02010528||LMGP02010546||LMGP02010572||LMGP02010601||LMGP02010627||LMGP02010641||LMGP02010660||LMGP02010800||LMGP02010846||LMGP02010875||LMGP02011072||LMGP10010893||LMGP100…	-0.82||-0.82||-0.82||-0.82||-0.82||-0.82||-0.82||-0.82||-0.82||-0.82||-0.82||-0.82||-0.82||-0.82||-0.82||-0.82||-0.82||-0.82||-0.82||-0.82||-0.82||-0.82||-0.82||-0.82||-0.82||-0.82||-0.82||-4.01||-4.01||-4.01||-4.01||-4.01||-4.01||-4.01||-4.01||-4.01||-4.01||-4.01||-4.01||-4.01||-4.01||-4.01||-4.01||-4.01||-4.01||-4.01||-4.01||-4.01||-4.01
753.588	C41H83N2O6P||C41H83N2O6P||C41H83N2O6P||C41H83N2O6P||C41H83N2O6P||C41H83N2O6P	[M+Na]+||[M+Na]+||[M+Na]+||[M+Na]+||[M+Na]+||[M+Na]+	PE-Cer(d14:1(4E)/25:0)||PE-Cer(d15:1(4E)/24:0)||PE-Cer(d16:1(4E)/23:0)||SM(d16:1/20:0)||SM(d18:0/18:1(9Z))||SM(d18:1/18:0)	LMSP03020013||LMSP03020018||LMSP03020025||LMSP03010052||LMSP03010031||LMSP03010001	-0.65||-0.65||-0.65||-0.65||-0.65||-0.65
754.536	C40H78NO8P||C40H78NO8P||C40H78NO8P||C40H78NO8P||C40H78NO8P||C40H78NO8P||C40H78NO8P||C40H78NO8P||C40H78NO8P||C40H78NO8P||C40H78NO8P||C40H78NO8P||C40H78NO8P||C40H78NO8P||C40H78NO8P||C40H78NO8P||C40H78NO8P||C40H78NO8P||C40H78NO8P||C40H78NO8P||C40H78NO8P||C40H78NO8P||C40H78NO8P||C40H78NO8P||C40H78NO8P||C40H78NO8P||C40H78NO8P||C40H78NO8P||C40H78NO8P||C40H78NO8P||C40H78NO8P||C40H78NO8P||C40H78NO8P||C40…	[M+Na]+||[M+Na]+||[M+Na]+||[M+Na]+||[M+Na]+||[M+Na]+||[M+Na]+||[M+Na]+||[M+Na]+||[M+Na]+||[M+Na]+||[M+Na]+||[M+Na]+||[M+Na]+||[M+Na]+||[M+Na]+||[M+Na]+||[M+Na]+||[M+Na]+||[M+Na]+||[M+Na]+||[M+Na]+||[M+Na]+||[M+Na]+||[M+Na]+||[M+Na]+||[M+Na]+||[M+Na]+||[M+Na]+||[M+Na]+||[M+Na]+||[M+Na]+||[M+Na]+||[M+Na]+||[M+Na]+||[M+NH4]+||[M+NH4]+||[M+NH4]+||[M+NH4]+||[M+NH4]+||[M+NH4]+||[M+H]+||[M+H]+||[M+H]+||…	PC(12:0/20:1(11Z))||PC(13:0/19:1(9Z))||PC(14:0/18:1(11Z))||PC(14:0/18:1(9Z))||PC(14:1(9Z)/18:0)||PC(15:0/17:1(9Z))||PC(15:1(9Z)/17:0)||PC(16:0/16:1(9Z))||PC(16:1(9Z)/16:0)||PC(17:0/15:1(9Z))||PC(17:1(9Z)/15:0)||PC(18:0/14:1(9Z))||PC(18:1(11Z)/14:0)||PC(18:1(9Z)/14:0)||PC(19:1(9Z)/13:0)||PC(20:1(11Z)/12:0)||PE(13:0/22:1(11Z))||PE(14:1(9Z)/21:0)||PE(15:0/20:1(11Z))||PE(15:1(9Z)/20:0)||PE(16:0/18:0(…	LMGP01011329||LMGP01011352||LMGP01010490||LMGP01010492||LMGP01011389||LMGP01011413||LMGP01011439||LMGP01010566||LMGP01011479||LMGP01011500||LMGP01011525||LMGP01011582||LMGP01012145||LMGP01010882||LMGP01011757||LMGP01011805||LMGP02010402||LMGP02010446||LMGP02010464||LMGP02010493||LMGP02011265||LMGP02010509||LMGP02010527||LMGP02011211||LMGP02010571||LMGP02010626||LMGP02010640||LMGP02010771||LMGP020…	-0.3||-0.3||-0.3||-0.3||-0.3||-0.3||-0.3||-0.3||-0.3||-0.3||-0.3||-0.3||-0.3||-0.3||-0.3||-0.3||-0.3||-0.3||-0.3||-0.3||-0.3||-0.3||-0.3||-0.3||-0.3||-0.3||-0.3||-0.3||-0.3||-0.3||-0.3||-0.3||-0.3||-0.3||-0.3||-3.48||-3.48||-3.48||-3.48||-3.48||-3.48||-3.49||-3.49||-3.49||-3.49||-3.49||-3.49||-3.49||-3.49||-3.49||-3.49||-3.49||-3.49||-3.49||-3.49||-3.49||-3.49||-3.49||-3.49||-3.49||-3.49||-3.49||…
754.745	C51H92O2	[M+NH4]+	22:0 Sitosterol ester	LMST01020050	2.24
756.553	C42H75O8P||C42H75O8P||C42H75O8P||C42H75O8P||C42H75O8P||C42H75O8P||C42H75O8P||C42H75O8P||C42H75O8P||C42H75O8P||C42H78NO8P||C42H78NO8P||C42H78NO8P||C42H78NO8P||C42H78NO8P||C42H78NO8P||C42H78NO8P||C42H78NO8P||C42H78NO8P||C42H78NO8P||C42H78NO8P||C42H78NO8P||C42H78NO8P||C42H78NO8P||C42H78NO8P||C42H78NO8P||C42H78NO8P||C42H78NO8P||C42H78NO8P||C42H78NO8P||C42H78NO8P||C42H78NO8P||C42H78NO8P||C42H78NO8P||C…	[M+NH4]+||[M+NH4]+||[M+NH4]+||[M+NH4]+||[M+NH4]+||[M+NH4]+||[M+NH4]+||[M+NH4]+||[M+NH4]+||[M+NH4]+||[M+H]+||[M+H]+||[M+H]+||[M+H]+||[M+H]+||[M+H]+||[M+H]+||[M+H]+||[M+H]+||[M+H]+||[M+H]+||[M+H]+||[M+H]+||[M+H]+||[M+H]+||[M+H]+||[M+H]+||[M+H]+||[M+H]+||[M+H]+||[M+H]+||[M+H]+||[M+H]+||[M+H]+||[M+H]+||[M+H]+||[M+H]+||[M+H]+||[M+Na]+||[M+Na]+||[M+Na]+||[M+Na]+||[M+Na]+||[M+Na]+||[M+Na]+||[M+Na]+||[M+…	PA(17:0/22:4(7Z,10Z,13Z,16Z))||PA(17:2(9Z,12Z)/22:2(13Z,16Z))||PA(18:4(6Z,9Z,12Z,15Z)/21:0)||PA(19:0/20:4(5Z,8Z,11Z,14Z))||PA(19:1(9Z)/20:3(8Z,11Z,14Z))||PA(20:3(8Z,11Z,14Z)/19:1(9Z))||PA(20:4(5Z,8Z,11Z,14Z)/19:0)||PA(21:0/18:4(6Z,9Z,12Z,15Z))||PA(22:2(13Z,16Z)/17:2(9Z,12Z))||PA(22:4(7Z,10Z,13Z,16Z)/17:0)||PC(14:0/20:3(5Z,8Z,11Z))||PC(14:0/20:3(8Z,11Z,14Z))||PC(14:1(9Z)/20:2(11Z,14Z))||PC(16:0/18…	LMGP10010245||LMGP10010303||LMGP10010448||LMGP10010470||LMGP10010500||LMGP10010605||LMGP10010634||LMGP10010688||LMGP10010765||LMGP10010794||LMGP01012127||LMGP01011374||LMGP01011399||LMGP01010598||LMGP01010601||LMGP01010690||LMGP01011530||LMGP01011560||LMGP01011620||LMGP01011646||LMGP01011677||LMGP01011838||LMGP01012192||LMGP01011868||LMGP02010502||LMGP02010554||LMGP02010581||LMGP02010610||LMGP020…	-1.21||-1.21||-1.21||-1.21||-1.21||-1.21||-1.21||-1.21||-1.21||-1.21||-1.22||-1.22||-1.22||-1.22||-1.22||-1.22||-1.22||-1.22||-1.22||-1.22||-1.22||-1.22||-1.22||-1.22||-1.22||-1.22||-1.22||-1.22||-1.22||-1.22||-1.22||-1.22||-1.22||-1.22||-1.22||-1.22||-1.22||-1.22||1.96||1.96||1.96||1.96||1.96||1.96||1.96||1.96||1.96||1.96||1.96||1.96||1.96||1.96||1.96||1.96||1.96||1.96||1.96||1.96||1.96||1.96||1…
757.621	C43H85N2O6P||C43H85N2O6P||C43H85N2O6P	[M+H]+||[M+H]+||[M+H]+	SM(d16:1/22:1)||SM(d18:1/20:1)||SM(d18:2/20:0)	LMSP03010058||LMSP03010059||LMSP03010060	-0.56||-0.56||-0.56
758.569	C42H77O8P||C42H77O8P||C42H77O8P||C42H77O8P||C42H77O8P||C42H77O8P||C42H77O8P||C42H77O8P||C42H77O8P||C42H77O8P||C42H77O8P||C42H77O8P||C42H80NO8P||C42H80NO8P||C42H80NO8P||C42H80NO8P||C42H80NO8P||C42H80NO8P||C42H80NO8P||C42H80NO8P||C42H80NO8P||C42H80NO8P||C42H80NO8P||C42H80NO8P||C42H80NO8P||C42H80NO8P||C42H80NO8P||C42H80NO8P||C42H80NO8P||C42H80NO8P||C42H80NO8P||C42H80NO8P||C42H80NO8P||C42H80NO8P||C42…	[M+NH4]+||[M+NH4]+||[M+NH4]+||[M+NH4]+||[M+NH4]+||[M+NH4]+||[M+NH4]+||[M+NH4]+||[M+NH4]+||[M+NH4]+||[M+NH4]+||[M+NH4]+||[M+H]+||[M+H]+||[M+H]+||[M+H]+||[M+H]+||[M+H]+||[M+H]+||[M+H]+||[M+H]+||[M+H]+||[M+H]+||[M+H]+||[M+H]+||[M+H]+||[M+H]+||[M+H]+||[M+H]+||[M+H]+||[M+H]+||[M+H]+||[M+H]+||[M+H]+||[M+H]+||[M+H]+||[M+H]+||[M+H]+||[M+H]+||[M+H]+||[M+H]+||[M+H]+||[M+H]+||[M+H]+||[M+H]+||[M+H]+||[M+H]+|…	PA(17:1(9Z)/22:2(13Z,16Z))||PA(17:2(9Z,12Z)/22:1(11Z))||PA(18:3(6Z,9Z,12Z)/21:0)||PA(18:3(9Z,12Z,15Z)/21:0)||PA(19:0/20:3(8Z,11Z,14Z))||PA(19:1(9Z)/20:2(11Z,14Z))||PA(20:2(11Z,14Z)/19:1(9Z))||PA(20:3(8Z,11Z,14Z)/19:0)||PA(21:0/18:3(6Z,9Z,12Z))||PA(21:0/18:3(9Z,12Z,15Z))||PA(22:1(11Z)/17:2(9Z,12Z))||PA(22:2(13Z,16Z)/17:1(9Z))||PC(12:0/22:2(13Z,16Z))||PC(14:0/20:2(11Z,14Z))||PC(14:1(9Z)/20:1(11Z))|…	LMGP10010273||LMGP10010302||LMGP10010389||LMGP10010417||LMGP10010469||LMGP10010499||LMGP10010574||LMGP10010604||LMGP10010686||LMGP10010687||LMGP10010734||LMGP10010764||LMGP01011336||LMGP01011373||LMGP01011398||LMGP01011449||LMGP01010585||LMGP01010586||LMGP01010587||LMGP01010588||LMGP01010589||LMGP01010590||LMGP01010591||LMGP01010592||LMGP01010594||LMGP01010678||LMGP01010687||LMGP01010688||LMGP010…	-0.38||-0.38||-0.38||-0.38||-0.38||-0.38||-0.38||-0.38||-0.38||-0.38||-0.38||-0.38||-0.39||-0.39||-0.39||-0.39||-0.39||-0.39||-0.39||-0.39||-0.39||-0.39||-0.39||-0.39||-0.39||-0.39||-0.39||-0.39||-0.39||-0.39||-0.39||-0.39||-0.39||-0.39||-0.39||-0.39||-0.39||-0.39||-0.39||-0.39||-0.39||-0.39||-0.39||-0.39||-0.39||-0.39||-0.39||-0.39||-0.39||-0.39||-0.39||-0.39||-0.39||-0.39||-0.39||-0.39||-0.39||…
760.585	C42H79O8P||C42H79O8P||C42H79O8P||C42H79O8P||C42H79O8P||C42H79O8P||C42H79O8P||C42H79O8P||C42H79O8P||C42H79O8P||C42H79O8P||C42H79O8P||C42H82NO8P||C42H82NO8P||C42H82NO8P||C42H82NO8P||C42H82NO8P||C42H82NO8P||C42H82NO8P||C42H82NO8P||C42H82NO8P||C42H82NO8P||C42H82NO8P||C42H82NO8P||C42H82NO8P||C42H82NO8P||C42H82NO8P||C42H82NO8P||C42H82NO8P||C42H82NO8P||C42H82NO8P||C42H82NO8P||C42H82NO8P||C42H82NO8P||C42…	[M+NH4]+||[M+NH4]+||[M+NH4]+||[M+NH4]+||[M+NH4]+||[M+NH4]+||[M+NH4]+||[M+NH4]+||[M+NH4]+||[M+NH4]+||[M+NH4]+||[M+NH4]+||[M+H]+||[M+H]+||[M+H]+||[M+H]+||[M+H]+||[M+H]+||[M+H]+||[M+H]+||[M+H]+||[M+H]+||[M+H]+||[M+H]+||[M+H]+||[M+H]+||[M+H]+||[M+H]+||[M+H]+||[M+H]+||[M+H]+||[M+H]+||[M+H]+||[M+H]+||[M+H]+||[M+H]+||[M+H]+||[M+H]+||[M+H]+||[M+H]+||[M+H]+||[M+H]+||[M+H]+||[M+H]+||[M+H]+||[M+H]+||[M+H]+|…	PA(17:0/22:2(13Z,16Z))||PA(17:1(9Z)/22:1(11Z))||PA(17:2(9Z,12Z)/22:0)||PA(18:2(9Z,12Z)/21:0)||PA(19:0/20:2(11Z,14Z))||PA(19:1(9Z)/20:1(11Z))||PA(20:1(11Z)/19:1(9Z))||PA(20:2(11Z,14Z)/19:0)||PA(21:0/18:2(9Z,12Z))||PA(22:0/17:2(9Z,12Z))||PA(22:1(11Z)/17:1(9Z))||PA(22:2(13Z,16Z)/17:0)||PC(12:0/22:1(11Z))||PC(14:0/20:1(11Z))||PC(14:1(9Z)/20:0)||PC(15:0/19:1(9Z))||PC(15:1(9Z)/19:0)||PC(16:0/18:1(11E))…	LMGP10010244||LMGP10010272||LMGP10010301||LMGP10010359||LMGP10010468||LMGP10010498||LMGP10010544||LMGP10010573||LMGP10010685||LMGP10010708||LMGP10010733||LMGP10010763||LMGP01011335||LMGP01011372||LMGP01011397||LMGP01011419||LMGP01011448||LMGP01010575||LMGP01010576||LMGP01010578||LMGP01010579||LMGP01010581||LMGP01010005||LMGP01011483||LMGP01011503||LMGP01011529||LMGP01010744||LMGP01012146||LMGP010…	-0.61||-0.61||-0.61||-0.61||-0.61||-0.61||-0.61||-0.61||-0.61||-0.61||-0.61||-0.61||-0.62||-0.62||-0.62||-0.62||-0.62||-0.62||-0.62||-0.62||-0.62||-0.62||-0.62||-0.62||-0.62||-0.62||-0.62||-0.62||-0.62||-0.62||-0.62||-0.62||-0.62||-0.62||-0.62||-0.62||-0.62||-0.62||-0.62||-0.62||-0.62||-0.62||-0.62||-0.62||-0.62||-0.62||-0.62||-0.62
761.588	C41H77NO10||C41H77NO10	[M+NH4]+||[M+NH4]+	Termitomycesphin A||Termitomycesphin C	LMSP05010118||LMSP05010099	-0.68||-0.68
762.6	C42H81O8P||C42H81O8P||C42H81O8P||C42H81O8P||C42H81O8P||C42H81O8P||C42H81O8P||C42H81O8P||C42H81O8P||C42H81O8P||C42H84NO8P||C42H84NO8P||C42H84NO8P||C42H84NO8P||C42H84NO8P||C42H84NO8P||C42H84NO8P||C42H84NO8P||C42H84NO8P||C42H84NO8P||C42H84NO8P||C42H84NO8P||C42H84NO8P||C42H84NO8P||C42H84NO8P||C42H84NO8P||C42H84NO8P||C42H84NO8P||C42H84NO8P||C42H84NO8P||C42H84NO8P||C42H84NO8P	[M+NH4]+||[M+NH4]+||[M+NH4]+||[M+NH4]+||[M+NH4]+||[M+NH4]+||[M+NH4]+||[M+NH4]+||[M+NH4]+||[M+NH4]+||[M+H]+||[M+H]+||[M+H]+||[M+H]+||[M+H]+||[M+H]+||[M+H]+||[M+H]+||[M+H]+||[M+H]+||[M+H]+||[M+H]+||[M+H]+||[M+H]+||[M+H]+||[M+H]+||[M+H]+||[M+H]+||[M+H]+||[M+H]+||[M+H]+||[M+H]+	PA(17:0/22:1(11Z))||PA(17:1(9Z)/22:0)||PA(18:1(9Z)/21:0)||PA(19:0/20:1(11Z))||PA(19:1(9Z)/20:0)||PA(20:0/19:1(9Z))||PA(20:1(11Z)/19:0)||PA(21:0/18:1(9Z))||PA(22:0/17:1(9Z))||PA(22:1(11Z)/17:0)||PC(10:0/24:0)||PC(11:0/23:0)||PC(12:0/22:0)||PC(13:0/21:0)||PC(14:0/20:0)||PC(15:0/19:0)||PC(16:0/18:0)||PC(17:0/17:0)||PC(18:0/16:0)||PC(19:0/15:0)||PC(20:0/14:0)||PC(21:0/13:0)||PC(22:0/12:0)||PE(15:0/22…	LMGP10010243||LMGP10010271||LMGP10010334||LMGP10010467||LMGP10010497||LMGP10010519||LMGP10010543||LMGP10010684||LMGP10010707||LMGP10010732||LMGP01010400||LMGP01010420||LMGP01010446||LMGP01010466||LMGP01010505||LMGP01010545||LMGP01010573||LMGP01010707||LMGP01010742||LMGP01010972||LMGP01011000||LMGP01011064||LMGP01011082||LMGP02010469||LMGP02010511||LMGP02010067||LMGP02010630||LMGP02011184||LMGP020…	-1.1||-1.1||-1.1||-1.1||-1.1||-1.1||-1.1||-1.1||-1.1||-1.1||-1.1||-1.1||-1.1||-1.1||-1.1||-1.1||-1.1||-1.1||-1.1||-1.1||-1.1||-1.1||-1.1||-1.1||-1.1||-1.1||-1.1||-1.1||-1.1||-1.1||-1.1||-1.1
763.594	C41H80NO8P||C41H80NO8P||C41H80NO8P||C41H80NO8P||C41H80NO8P||C41H80NO8P||C41H80NO8P||C41H80NO8P||C41H80NO8P||C41H80NO8P||C41H80NO8P||C41H80NO8P||C41H80NO8P||C41H80NO8P||C41H80NO8P||C41H80NO8P||C41H80NO8P||C41H80NO8P||C41H80NO8P||C41H80NO8P||C41H80NO8P||C41H80NO8P||C41H80NO8P||C41H80NO8P||C41H80NO8P||C41H80NO8P||C41H80NO8P||C41H80NO8P||C41H80NO8P||C41H80NO8P||C41H80NO8P||C41H80NO8P||C41H80NO8P||C41…	[M+NH4]+||[M+NH4]+||[M+NH4]+||[M+NH4]+||[M+NH4]+||[M+NH4]+||[M+NH4]+||[M+NH4]+||[M+NH4]+||[M+NH4]+||[M+NH4]+||[M+NH4]+||[M+NH4]+||[M+NH4]+||[M+NH4]+||[M+NH4]+||[M+NH4]+||[M+NH4]+||[M+NH4]+||[M+NH4]+||[M+NH4]+||[M+NH4]+||[M+NH4]+||[M+NH4]+||[M+NH4]+||[M+NH4]+||[M+NH4]+||[M+NH4]+||[M+NH4]+||[M+NH4]+||[M+NH4]+||[M+NH4]+||[M+NH4]+||[M+NH4]+	PC(13:0/20:1(11Z))||PC(14:0/19:1(9Z))||PC(14:1(9Z)/19:0)||PC(15:0/18:1(11Z))||PC(15:0/18:1(9Z))||PC(15:1(9Z)/18:0)||PC(16:0/17:1(9Z))||PC(16:1(9Z)/17:0)||PC(17:0/16:1(9Z))||PC(17:1(9Z)/16:0)||PC(18:0/15:1(9Z))||PC(18:1(9Z)/15:0)||PC(19:0/14:1(9Z))||PC(19:1(9Z)/14:0)||PC(20:1(11Z)/13:0)||PE(14:0/22:1(11Z))||PE(14:1(9Z)/22:0)||PE(15:1(9Z)/21:0)||PE(16:0/20:1(11Z))||PE(16:1(9Z)/20:0)||PE(17:0/19:1(9…	LMGP01011353||LMGP01011371||LMGP01011395||LMGP01010541||LMGP01011415||LMGP01011442||LMGP01010571||LMGP01011480||LMGP01011502||LMGP01011527||LMGP01011584||LMGP01011598||LMGP01011731||LMGP01011758||LMGP01011806||LMGP02010419||LMGP02010447||LMGP02010499||LMGP02010312||LMGP02010529||LMGP02010551||LMGP02010577||LMGP02010301||LMGP02010036||LMGP02010050||LMGP02010773||LMGP02010801||LMGP02010827||LMGP020…	-2.72||-2.72||-2.72||-2.72||-2.72||-2.72||-2.72||-2.72||-2.72||-2.72||-2.72||-2.72||-2.72||-2.72||-2.72||-2.72||-2.72||-2.72||-2.72||-2.72||-2.72||-2.72||-2.72||-2.72||-2.72||-2.72||-2.72||-2.72||-2.72||-2.72||-2.72||-2.72||-2.72||-2.72
764.52	C41H76NO8P||C41H76NO8P||C41H76NO8P||C41H76NO8P||C41H76NO8P||C41H76NO8P||C41H76NO8P||C41H76NO8P||C41H76NO8P||C41H76NO8P||C41H76NO8P||C41H76NO8P||C41H76NO8P||C41H76NO8P||C41H76NO8P||C41H76NO8P||C41H76NO8P||C41H76NO8P||C41H76NO8P||C41H76NO8P||C41H76NO8P||C41H76NO8P||C41H76NO8P||C41H76NO8P||C43H71O8P||C43H71O8P||C43H71O8P||C43H71O8P||C43H71O8P||C43H71O8P||C43H71O8P||C43H71O8P||C43H71O8P||C43H71O8P||C…	[M+Na]+||[M+Na]+||[M+Na]+||[M+Na]+||[M+Na]+||[M+Na]+||[M+Na]+||[M+Na]+||[M+Na]+||[M+Na]+||[M+Na]+||[M+Na]+||[M+Na]+||[M+Na]+||[M+Na]+||[M+Na]+||[M+Na]+||[M+Na]+||[M+Na]+||[M+Na]+||[M+Na]+||[M+Na]+||[M+Na]+||[M+Na]+||[M+NH4]+||[M+NH4]+||[M+NH4]+||[M+NH4]+||[M+NH4]+||[M+NH4]+||[M+NH4]+||[M+NH4]+||[M+NH4]+||[M+NH4]+||[M+H]+||[M+H]+||[M+H]+||[M+H]+||[M+H]+||[M+H]+||[M+H]+||[M+H]+||[M+H]+||[M+H]+||[M+…	PC(13:0/20:3(8Z,11Z,14Z))||PC(15:0/18:3(6Z,9Z,12Z))||PC(15:0/18:3(9Z,12Z,15Z))||PC(15:1(9Z)/18:2(9Z,12Z))||PC(16:1(9Z)/17:2(9Z,12Z))||PC(17:2(9Z,12Z)/16:1(9Z))||PC(18:2(9Z,12Z)/15:1(9Z))||PC(18:3(6Z,9Z,12Z)/15:0)||PC(18:3(9Z,12Z,15Z)/15:0)||PC(20:3(8Z,11Z,14Z)/13:0)||PE(14:1(9Z)/22:2(13Z,16Z))||PE(16:0/20:3(8Z,11Z,14Z))||PE(16:1(9Z)/20:2(11Z,14Z))||PE(17:2(9Z,12Z)/19:1(9Z))||PE(18:0/18:3(6Z,9Z,12…	LMGP01011355||LMGP01011416||LMGP01011417||LMGP01011444||LMGP01011482||LMGP01011558||LMGP01011619||LMGP01011644||LMGP01011675||LMGP01011867||LMGP02010449||LMGP02011222||LMGP02010531||LMGP02010608||LMGP02010628||LMGP02010629||LMGP02010048||LMGP02010663||LMGP02010690||LMGP02010720||LMGP02010803||LMGP02010878||LMGP02010908||LMGP02011074||LMGP10010040||LMGP10010393||LMGP10010421||LMGP10010580||LMGP100…	-0.48||-0.48||-0.48||-0.48||-0.48||-0.48||-0.48||-0.48||-0.48||-0.48||-0.48||-0.48||-0.48||-0.48||-0.48||-0.48||-0.48||-0.48||-0.48||-0.48||-0.48||-0.48||-0.48||-0.48||-3.63||-3.63||-3.63||-3.63||-3.63||-3.63||-3.63||-3.63||-3.63||-3.63||-3.63||-3.63||-3.63||-3.63||-3.63||-3.63||-3.63||-3.63||-3.63||-3.63||-3.63||-3.63||-3.63||-3.63||-3.63||-3.63||-3.63||-3.63||-3.63
766.537	C41H78NO8P||C41H78NO8P||C41H78NO8P||C41H78NO8P||C41H78NO8P||C41H78NO8P||C41H78NO8P||C41H78NO8P||C41H78NO8P||C41H78NO8P||C41H78NO8P||C41H78NO8P||C41H78NO8P||C41H78NO8P||C41H78NO8P||C41H78NO8P||C41H78NO8P||C41H78NO8P||C41H78NO8P||C41H78NO8P||C41H78NO8P||C41H78NO8P||C41H78NO8P||C41H78NO8P||C41H78NO8P||C41H78NO8P||C41H78NO8P||C41H78NO8P||C41H78NO8P||C41H78NO8P||C43H73O8P||C43H73O8P||C43H73O8P||C43H73…	[M+Na]+||[M+Na]+||[M+Na]+||[M+Na]+||[M+Na]+||[M+Na]+||[M+Na]+||[M+Na]+||[M+Na]+||[M+Na]+||[M+Na]+||[M+Na]+||[M+Na]+||[M+Na]+||[M+Na]+||[M+Na]+||[M+Na]+||[M+Na]+||[M+Na]+||[M+Na]+||[M+Na]+||[M+Na]+||[M+Na]+||[M+Na]+||[M+Na]+||[M+Na]+||[M+Na]+||[M+Na]+||[M+Na]+||[M+Na]+||[M+NH4]+||[M+NH4]+||[M+NH4]+||[M+NH4]+||[M+NH4]+||[M+NH4]+||[M+NH4]+||[M+NH4]+||[M+NH4]+||[M+NH4]+||[M+NH4]+||[M+H]+||[M+H]+||[M+…	PC(13:0/20:2(11Z,14Z))||PC(14:1(9Z)/19:1(9Z))||PC(15:0/18:2(9Z,12Z))||PC(15:1(9Z)/18:1(9Z))||PC(16:0/17:2(9Z,12Z))||PC(16:1(9Z)/17:1(9Z))||PC(17:1(9Z)/16:1(9Z))||PC(17:2(9Z,12Z)/16:0)||PC(18:1(9Z)/15:1(9Z))||PC(18:2(9Z,12Z)/15:0)||PC(19:1(9Z)/14:1(9Z))||PC(20:2(11Z,14Z)/13:0)||PE(14:0/22:2(13Z,16Z))||PE(14:1(9Z)/22:1(11Z))||PE(16:0/20:2(11Z,14Z))||PE(16:1(9Z)/20:1(11Z))||PE(17:1(9Z)/19:1(9Z))||PE…	LMGP01011354||LMGP01011396||LMGP01010543||LMGP01011443||LMGP01011465||LMGP01011481||LMGP01011528||LMGP01011557||LMGP01011599||LMGP01011618||LMGP01011759||LMGP01011836||LMGP02010420||LMGP02010448||LMGP02010510||LMGP02010530||LMGP02010578||LMGP02010607||LMGP02011270||LMGP02010044||LMGP02010109||LMGP02010039||LMGP02010052||LMGP02011193||LMGP02010774||LMGP02010802||LMGP02010848||LMGP02010877||LMGP020…	1.09||1.09||1.09||1.09||1.09||1.09||1.09||1.09||1.09||1.09||1.09||1.09||1.09||1.09||1.09||1.09||1.09||1.09||1.09||1.09||1.09||1.09||1.09||1.09||1.09||1.09||1.09||1.09||1.09||1.09||-2.04||-2.04||-2.04||-2.04||-2.04||-2.04||-2.04||-2.04||-2.04||-2.04||-2.04||-2.04||-2.04||-2.04||-2.04||-2.04||-2.04||-2.04||-2.04||-2.04||-2.04||-2.04||-2.04||-2.04||-2.04||-2.04||-2.04||-2.04||-2.04||-2.04||-2.04||-2…
766.574	C44H80NO7P||C44H80NO7P||C44H80NO7P||C44H80NO7P||C42H82NO7P||C42H82NO7P||C42H82NO7P||C42H82NO7P||C42H82NO7P||C42H82NO7P||C42H82NO7P||C42H82NO7P||C42H82NO7P||C42H82NO7P||C42H82NO7P	[M+H]+||[M+H]+||[M+H]+||[M+H]+||[M+Na]+||[M+Na]+||[M+Na]+||[M+Na]+||[M+Na]+||[M+Na]+||[M+Na]+||[M+Na]+||[M+Na]+||[M+Na]+||[M+Na]+	PC(O-16:0/20:5(5Z,8Z,11Z,14Z,17Z))||PC(O-16:1(9Z)/20:4(8Z,11Z,14Z,17Z))||PC(P-16:0/20:4(5Z,8Z,11Z,14Z))||PC(P-18:0/18:4(6Z,9Z,12Z,15Z))||PC(O-16:0/18:2(9Z,12Z))||PC(P-16:0/18:1(11Z))||PC(P-16:0/18:1(9Z))||PC(P-18:0/16:1(9Z))||PC(P-18:1(11Z)/16:0)||PC(P-18:1(9Z)/16:0)||PC(P-20:0/14:1(9Z))||PE(O-20:0/17:2(9Z,12Z))||PE(P-18:0/19:1(9Z))||PE(P-20:0/17:1(9Z))||PnC(16:0/18:1(9Z))	LMGP01020058||LMGP01020259||LMGP01030010||LMGP01030061||LMGP01020039||LMGP01030128||LMGP01030006||LMGP01030053||LMGP01030134||LMGP01030144||LMGP01030077||LMGP02020070||LMGP02030051||LMGP02030071||LMGP16010001	-1.27||-1.27||-1.27||-1.27||1.87||1.87||1.87||1.87||1.87||1.87||1.87||1.87||1.87||1.87||1.87
768.493	C43H72NO7P	[M+Na]+	1-(6-[3]-ladderane-hexanoyl)-2-(8-[3]-ladderane-octanyl)-sn-glycerophosphoethanolamine	LMGP02080008	-0.65
768.553	C43H75O8P||C43H75O8P||C43H75O8P||C43H75O8P||C43H75O8P||C43H75O8P||C43H75O8P||C43H75O8P||C43H75O8P||C43H75O8P||C43H75O8P||C43H75O8P||C43H75O8P||C43H75O8P||C43H78NO8P||C43H78NO8P||C43H78NO8P||C43H78NO8P||C43H78NO8P||C43H78NO8P||C43H78NO8P||C43H78NO8P||C43H78NO8P||C43H78NO8P||C43H78NO8P||C43H78NO8P||C43H78NO8P||C43H78NO8P||C43H78NO8P||C43H78NO8P||C43H78NO8P||C43H78NO8P||C43H78NO8P||C43H78NO8P||C43H7…	[M+NH4]+||[M+NH4]+||[M+NH4]+||[M+NH4]+||[M+NH4]+||[M+NH4]+||[M+NH4]+||[M+NH4]+||[M+NH4]+||[M+NH4]+||[M+NH4]+||[M+NH4]+||[M+NH4]+||[M+NH4]+||[M+H]+||[M+H]+||[M+H]+||[M+H]+||[M+H]+||[M+H]+||[M+H]+||[M+H]+||[M+H]+||[M+H]+||[M+H]+||[M+H]+||[M+H]+||[M+H]+||[M+H]+||[M+H]+||[M+H]+||[M+H]+||[M+H]+||[M+H]+||[M+H]+||[M+H]+||[M+H]+||[M+H]+||[M+H]+||[M+H]+||[M+H]+||[M+H]+||[M+H]+||[M+H]+||[M+H]+||[M+H]+||[M+…	PA(18:1(9Z)/22:4(7Z,10Z,13Z,16Z))||PA(18:3(6Z,9Z,12Z)/22:2(13Z,16Z))||PA(18:3(9Z,12Z,15Z)/22:2(13Z,16Z))||PA(18:4(6Z,9Z,12Z,15Z)/22:1(11Z))||PA(20:0/20:5(5Z,8Z,11Z,14Z,17Z))||PA(20:1(11Z)/20:4(5Z,8Z,11Z,14Z))||PA(20:2(11Z,14Z)/20:3(8Z,11Z,14Z))||PA(20:3(8Z,11Z,14Z)/20:2(11Z,14Z))||PA(20:4(5Z,8Z,11Z,14Z)/20:1(11Z))||PA(20:5(5Z,8Z,11Z,14Z,17Z)/20:0)||PA(22:1(11Z)/18:4(6Z,9Z,12Z,15Z))||PA(22:2(13Z,1…	LMGP10010337||LMGP10010392||LMGP10010420||LMGP10010450||LMGP10010521||LMGP10010548||LMGP10010578||LMGP10010608||LMGP10010637||LMGP10010665||LMGP10010740||LMGP10010769||LMGP10010770||LMGP10010798||LMGP01011361||LMGP01011424||LMGP01011453||LMGP01011508||LMGP01011534||LMGP01011535||LMGP01011563||LMGP01010931||LMGP01011623||LMGP01011649||LMGP01011680||LMGP01011708||LMGP01011871||LMGP01011901||LMGP010…	-0.58||-0.58||-0.58||-0.58||-0.58||-0.58||-0.58||-0.58||-0.58||-0.58||-0.58||-0.58||-0.58||-0.58||-0.58||-0.58||-0.58||-0.58||-0.58||-0.58||-0.58||-0.58||-0.58||-0.58||-0.58||-0.58||-0.58||-0.58||-0.58||-0.58||-0.58||-0.58||-0.58||-0.58||-0.58||-0.58||-0.58||-0.58||-0.58||-0.58||-0.58||-0.58||-0.58||-0.58||-0.58||-0.58||-0.58||-0.58||2.54||2.54||2.54||2.54||2.54||2.54||2.54||2.54||2.54||2.54||2.5…
768.589	C44H82NO7P||C44H82NO7P||C44H82NO7P||C44H82NO7P||C44H82NO7P||C44H82NO7P||C44H82NO7P||C44H82NO7P||C44H82NO7P||C42H84NO7P||C42H84NO7P||C42H84NO7P||C42H84NO7P||C42H84NO7P||C42H84NO7P||C42H84NO7P||C42H84NO7P||C42H84NO7P||C42H84NO7P||C42H84NO7P||C42H84NO7P||C42H84NO7P||C42H84NO7P	[M+H]+||[M+H]+||[M+H]+||[M+H]+||[M+H]+||[M+H]+||[M+H]+||[M+H]+||[M+H]+||[M+Na]+||[M+Na]+||[M+Na]+||[M+Na]+||[M+Na]+||[M+Na]+||[M+Na]+||[M+Na]+||[M+Na]+||[M+Na]+||[M+Na]+||[M+Na]+||[M+Na]+||[M+Na]+	PC(O-16:0/20:4(5E,8E,11E,14E))||PC(O-16:0/20:4(5Z,8Z,11Z,14Z))||PC(O-16:0/20:4(8Z,11Z,14Z,17Z))||PC(O-18:0/18:4(6Z,9Z,12Z,15Z))||PC(O-18:2(9Z,12Z)/18:2(9Z,12Z))||PC(P-16:0/20:3(5Z,8Z,11Z))||PC(P-16:0/20:3(8Z,11Z,14Z))||PC(P-18:0/18:3(6Z,9Z,12Z))||PC(P-18:0/18:3(9Z,12Z,15Z))||PC(O-16:0/18:1(9Z))||PC(O-16:1(9Z)/18:0)||PC(O-18:0/16:1(9Z))||PC(O-18:1(11Z)/16:0)||PC(O-18:1(9Z)/16:0)||PC(O-20:0/14:1(9Z…	LMGP01020054||LMGP01020056||LMGP01020245||LMGP01020206||LMGP01020270||LMGP01030129||LMGP01030039||LMGP01030059||LMGP01030060||LMGP01020003||LMGP01020256||LMGP01020089||LMGP01020261||LMGP01020152||LMGP01020219||LMGP01030030||LMGP01030052||LMGP01030076||LMGP02020053||LMGP02020069||LMGP02030029||LMGP02030050||LMGP02030070	-1.1||-1.1||-1.1||-1.1||-1.1||-1.1||-1.1||-1.1||-1.1||2.03||2.03||2.03||2.03||2.03||2.03||2.03||2.03||2.03||2.03||2.03||2.03||2.03||2.03
769.475	C40H66NO10P||C40H66NO10P||C40H66NO10P||C40H66NO10P||C43H71O8P||C43H71O8P||C43H71O8P||C43H71O8P||C43H71O8P||C43H71O8P||C43H71O8P||C43H71O8P||C43H71O8P||C43H71O8P	[M+NH4]+||[M+NH4]+||[M+NH4]+||[M+NH4]+||[M+Na]+||[M+Na]+||[M+Na]+||[M+Na]+||[M+Na]+||[M+Na]+||[M+Na]+||[M+Na]+||[M+Na]+||[M+Na]+	PS(12:0/22:6(4Z,7Z,10Z,13Z,16Z,19Z))||PS(14:1(9Z)/20:5(5Z,8Z,11Z,14Z,17Z))||PS(20:5(5Z,8Z,11Z,14Z,17Z)/14:1(9Z))||PS(22:6(4Z,7Z,10Z,13Z,16Z,19Z)/12:0)||PA(18:1(9Z)/22:6(4Z,7Z,10Z,13Z,16Z,19Z))||PA(18:3(6Z,9Z,12Z)/22:4(7Z,10Z,13Z,16Z))||PA(18:3(9Z,12Z,15Z)/22:4(7Z,10Z,13Z,16Z))||PA(20:2(11Z,14Z)/20:5(5Z,8Z,11Z,14Z,17Z))||PA(20:3(8Z,11Z,14Z)/20:4(5Z,8Z,11Z,14Z))||PA(20:4(5Z,8Z,11Z,14Z)/20:3(8Z,11Z,…	LMGP03010937||LMGP03010132||LMGP03010651||LMGP03010817||LMGP10010040||LMGP10010393||LMGP10010421||LMGP10010580||LMGP10010610||LMGP10010639||LMGP10010667||LMGP10010800||LMGP10010801||LMGP10010827	-1.37||-1.37||-1.37||-1.37||-3.47||-3.47||-3.47||-3.47||-3.47||-3.47||-3.47||-3.47||-3.47||-3.47
770.509	C43H74NO7P	[M+Na]+	PE(P-16:0/22:6(4Z,7Z,10Z,13Z,16Z,19Z))	LMGP02030001	-0.36
770.568	C43H77O8P||C43H77O8P||C43H77O8P||C43H77O8P||C43H77O8P||C43H77O8P||C43H77O8P||C43H77O8P||C43H77O8P||C43H77O8P||C43H77O8P||C43H77O8P||C43H77O8P||C43H77O8P||C43H77O8P||C43H80NO8P||C43H80NO8P||C43H80NO8P||C43H80NO8P||C43H80NO8P||C43H80NO8P||C43H80NO8P||C43H80NO8P||C43H80NO8P||C43H80NO8P||C43H80NO8P||C43H80NO8P||C43H80NO8P||C43H80NO8P||C43H80NO8P||C43H80NO8P||C43H80NO8P||C43H80NO8P||C43H80NO8P||C43H80…	[M+NH4]+||[M+NH4]+||[M+NH4]+||[M+NH4]+||[M+NH4]+||[M+NH4]+||[M+NH4]+||[M+NH4]+||[M+NH4]+||[M+NH4]+||[M+NH4]+||[M+NH4]+||[M+NH4]+||[M+NH4]+||[M+NH4]+||[M+H]+||[M+H]+||[M+H]+||[M+H]+||[M+H]+||[M+H]+||[M+H]+||[M+H]+||[M+H]+||[M+H]+||[M+H]+||[M+H]+||[M+H]+||[M+H]+||[M+H]+||[M+H]+||[M+H]+||[M+H]+||[M+H]+||[M+H]+||[M+H]+||[M+H]+||[M+H]+||[M+H]+||[M+Na]+||[M+Na]+||[M+Na]+||[M+Na]+||[M+Na]+||[M+Na]+||[M+…	PA(18:0/22:4(7Z,10Z,13Z,16Z))||PA(18:2(9Z,12Z)/22:2(13Z,16Z))||PA(18:3(6Z,9Z,12Z)/22:1(11Z))||PA(18:3(9Z,12Z,15Z)/22:1(11Z))||PA(18:4(6Z,9Z,12Z,15Z)/22:0)||PA(20:0/20:4(5Z,8Z,11Z,14Z))||PA(20:1(11Z)/20:3(8Z,11Z,14Z))||PA(20:2(11Z,14Z)/20:2(11Z,14Z))||PA(20:3(8Z,11Z,14Z)/20:1(11Z))||PA(20:4(5Z,8Z,11Z,14Z)/20:0)||PA(22:0/18:4(6Z,9Z,12Z,15Z))||PA(22:1(11Z)/18:3(6Z,9Z,12Z))||PA(22:1(11Z)/18:3(9Z,12Z,…	LMGP10010883||LMGP10010362||LMGP10010391||LMGP10010419||LMGP10010449||LMGP10010861||LMGP10010547||LMGP10010577||LMGP10010607||LMGP10010636||LMGP10010712||LMGP10010738||LMGP10010739||LMGP10010768||LMGP10010797||LMGP01011423||LMGP01011452||LMGP01011506||LMGP01011507||LMGP01011533||LMGP01011562||LMGP01011602||LMGP01011622||LMGP01011648||LMGP01011679||LMGP01011840||LMGP01011870||LMGP02010537||LMGP020…	-1.42||-1.42||-1.42||-1.42||-1.42||-1.42||-1.42||-1.42||-1.42||-1.42||-1.42||-1.42||-1.42||-1.42||-1.42||-1.42||-1.42||-1.42||-1.42||-1.42||-1.42||-1.42||-1.42||-1.42||-1.42||-1.42||-1.42||-1.42||-1.42||-1.42||-1.42||-1.42||-1.42||-1.42||-1.42||-1.42||-1.42||-1.42||-1.42||1.7||1.7||1.7||1.7||1.7||1.7||1.7||1.7||1.7||1.7||1.7||1.7||1.7||1.7||1.7||1.7||1.7||1.7||1.7||1.7||1.7||1.7
770.605	C44H84NO7P||C44H84NO7P||C44H84NO7P||C44H84NO7P||C44H84NO7P||C44H84NO7P||C44H84NO7P||C44H84NO7P||C42H86NO7P||C42H86NO7P||C42H86NO7P||C42H86NO7P||C42H86NO7P||C42H86NO7P||C42H86NO7P	[M+H]+||[M+H]+||[M+H]+||[M+H]+||[M+H]+||[M+H]+||[M+H]+||[M+H]+||[M+Na]+||[M+Na]+||[M+Na]+||[M+Na]+||[M+Na]+||[M+Na]+||[M+Na]+	PC(O-16:0/20:3(8Z,11Z,14Z))||PC(O-18:0/18:3(6Z,9Z,12Z))||PC(O-18:0/18:3(9Z,12Z,15Z))||PC(O-18:1(11Z)/18:2(9Z,12Z))||PC(O-18:1(9Z)/18:2(9Z,12Z))||PC(P-16:0/20:2(11Z,14Z))||PC(P-18:0/18:2(9Z,12Z))||PC(P-18:1(11Z)/18:1(11Z))||PC(O-16:0/18:0)||PC(O-17:0/17:0)||PC(O-18:0/16:0)||PC(O-20:0/14:0)||PE(O-16:0/21:0)||PE(O-18:0/19:0)||PE(O-20:0/17:0)	LMGP01020053||LMGP01020204||LMGP01020205||LMGP01020262||LMGP01020264||LMGP01030038||LMGP01030058||LMGP01030137||LMGP01020033||LMGP01020076||LMGP01020086||LMGP01020218||LMGP02020034||LMGP02020052||LMGP02020068	-0.61||-0.61||-0.61||-0.61||-0.61||-0.61||-0.61||-0.61||2.51||2.51||2.51||2.51||2.51||2.51||2.51
771.493	C43H73O8P||C43H73O8P||C43H73O8P||C43H73O8P||C43H73O8P||C43H73O8P||C43H73O8P||C43H73O8P||C43H73O8P||C43H73O8P||C43H73O8P||C40H68NO10P||C40H68NO10P||C40H68NO10P||C40H68NO10P||C40H68NO10P||C40H68NO10P||C45H71O8P||C45H71O8P||C45H71O8P||C45H71O8P	[M+Na]+||[M+Na]+||[M+Na]+||[M+Na]+||[M+Na]+||[M+Na]+||[M+Na]+||[M+Na]+||[M+Na]+||[M+Na]+||[M+Na]+||[M+NH4]+||[M+NH4]+||[M+NH4]+||[M+NH4]+||[M+NH4]+||[M+NH4]+||[M+H]+||[M+H]+||[M+H]+||[M+H]+	PA(18:0/22:6(4Z,7Z,10Z,13Z,16Z,19Z))||PA(18:2(9Z,12Z)/22:4(7Z,10Z,13Z,16Z))||PA(18:4(6Z,9Z,12Z,15Z)/22:2(13Z,16Z))||PA(20:1(11Z)/20:5(5Z,8Z,11Z,14Z,17Z))||PA(20:2(11Z,14Z)/20:4(5Z,8Z,11Z,14Z))||PA(20:3(8Z,11Z,14Z)/20:3(8Z,11Z,14Z))||PA(20:4(5Z,8Z,11Z,14Z)/20:2(11Z,14Z))||PA(20:5(5Z,8Z,11Z,14Z,17Z)/20:1(11Z))||PA(22:2(13Z,16Z)/18:4(6Z,9Z,12Z,15Z))||PA(22:4(7Z,10Z,13Z,16Z)/18:2(9Z,12Z))||PA(22:6(4Z…	LMGP10010039||LMGP10010363||LMGP10010451||LMGP10010549||LMGP10010579||LMGP10010609||LMGP10010638||LMGP10010666||LMGP10010771||LMGP10010799||LMGP10010826||LMGP03010922||LMGP03010131||LMGP03010899||LMGP03010432||LMGP03010623||LMGP03010650||LMGP10010617||LMGP10010675||LMGP10010810||LMGP10010837	-0.82||-0.82||-0.82||-0.82||-0.82||-0.82||-0.82||-0.82||-0.82||-0.82||-0.82||1.28||1.28||1.28||1.28||1.28||1.28||-3.93||-3.93||-3.93||-3.93
771.513	C40H77O10P||C40H77O10P||C40H77O10P||C40H77O10P||C40H77O10P||C40H77O10P||C40H77O10P||C40H77O10P||C40H77O10P||C40H77O10P||C40H77O10P||C40H77O10P||C40H77O10P||C40H77O10P||C40H77O10P||C40H77O10P||C40H77O10P||C40H77O10P||C40H77O10P	[M+Na]+||[M+Na]+||[M+Na]+||[M+Na]+||[M+Na]+||[M+Na]+||[M+Na]+||[M+Na]+||[M+Na]+||[M+Na]+||[M+Na]+||[M+Na]+||[M+Na]+||[M+Na]+||[M+Na]+||[M+Na]+||[M+Na]+||[M+Na]+||[M+Na]+	LBPA(16:0/18:1(9Z))||PG(12:0/22:1(11Z))||PG(14:0/20:1(11Z))||PG(14:1(9Z)/20:0)||PG(15:0/19:1(9Z))||PG(15:1(9Z)/19:0)||PG(16:0/18:1(11Z))||PG(16:0/18:1(9Z))||PG(16:0/18:1(9Z))||PG(16:1(9Z)/18:0)||PG(17:0/17:1(9Z))||PG(17:1(9Z)/17:0)||PG(18:0/16:1(9Z))||PG(18:1(9Z)/16:0)||PG(19:0/15:1(9Z))||PG(19:1(9Z)/15:0)||PG(20:0/14:1(9Z))||PG(20:1(11Z)/14:0)||PG(22:1(11Z)/12:0)	LMGP04100002||LMGP04010065||LMGP04010102||LMGP04010127||LMGP04010149||LMGP04010178||LMGP04010008||LMGP04010002||LMGP04010987||LMGP04010211||LMGP04010231||LMGP04010256||LMGP04010887||LMGP04010962||LMGP04010457||LMGP04010484||LMGP04010511||LMGP04010530||LMGP04010725	-2.61||-2.61||-2.61||-2.61||-2.61||-2.61||-2.61||-2.61||-2.61||-2.61||-2.61||-2.61||-2.61||-2.61||-2.61||-2.61||-2.61||-2.61||-2.61
771.609	C43H79NO9||C43H79NO9||C43H79NO9||C43H79NO9||C53H80O2	[M+NH4]+||[M+NH4]+||[M+NH4]+||[M+NH4]+||[M+Na]+	Chrysogeside D||Flavicerebroside B||GalCer(d18:2(4E,8E)(9Me)/18:1(3E)(2OH[S]))||GlcCer(d18:2(4E,8E)(9Me)/18:1(3E)(2OH[S]))||Plastochromenol-8	LMSP05010092||LMSP05010117||LMSP0501AC24||LMSP0501AA82||LMPR02020067	-0.78||-0.78||-0.78||-0.78||4.73
772.516	C41H74NO10P||C41H74NO10P||C41H74NO10P||C41H74NO10P||C41H74NO10P||C41H74NO10P||C41H74NO10P||C41H74NO10P||C41H74NO10P||C41H74NO10P||C41H74NO10P||C41H74NO10P||C41H71O10P||C41H71O10P||C41H71O10P||C41H71O10P||C41H71O10P||C41H71O10P||C41H71O10P||C41H71O10P||C41H71O10P||C41H71O10P	[M+H]+||[M+H]+||[M+H]+||[M+H]+||[M+H]+||[M+H]+||[M+H]+||[M+H]+||[M+H]+||[M+H]+||[M+H]+||[M+H]+||[M+NH4]+||[M+NH4]+||[M+NH4]+||[M+NH4]+||[M+NH4]+||[M+NH4]+||[M+NH4]+||[M+NH4]+||[M+NH4]+||[M+NH4]+	PS(15:0/20:3(8Z,11Z,14Z))||PS(15:1(9Z)/20:2(11Z,14Z))||PS(17:0/18:3(6Z,9Z,12Z))||PS(17:0/18:3(9Z,12Z,15Z))||PS(17:1(9Z)/18:2(9Z,12Z))||PS(17:2(9Z,12Z)/18:1(9Z))||PS(18:1(9Z)/17:2(9Z,12Z))||PS(18:2(9Z,12Z)/17:1(9Z))||PS(18:3(6Z,9Z,12Z)/17:0)||PS(18:3(9Z,12Z,15Z)/17:0)||PS(20:2(11Z,14Z)/15:1(9Z))||PS(20:3(8Z,11Z,14Z)/15:0)||PG(15:0/20:5(5Z,8Z,11Z,14Z,17Z))||PG(15:1(9Z)/20:4(5Z,8Z,11Z,14Z))||PG(17:1…	LMGP03010153||LMGP03010182||LMGP03010234||LMGP03010235||LMGP03010260||LMGP03010289||LMGP03010329||LMGP03010348||LMGP03010374||LMGP03010404||LMGP03010563||LMGP03010593||LMGP04010155||LMGP04010184||LMGP04010263||LMGP04010291||LMGP04010292||LMGP04010376||LMGP04010406||LMGP04010434||LMGP04010625||LMGP04010652	4.45||4.45||4.45||4.45||4.45||4.45||4.45||4.45||4.45||4.45||4.45||4.45||4.45||4.45||4.45||4.45||4.45||4.45||4.45||4.45||4.45||4.45
772.525	C43H76NO7P||C43H76NO7P||C45H74NO7P	[M+Na]+||[M+Na]+||[M+H]+	PE(O-16:0/22:6(4Z,7Z,10Z,13Z,16Z,19Z))||PE(P-18:0/20:5(5Z,8Z,11Z,14Z,17Z))||1-(8-[5]-ladderane-octanoyl)-2-(8-[3]-ladderane-octanyl)-sn-glycerophosphoethanolamine	LMGP02020020||LMGP02030056||LMGP02080002	-0.74||-0.74||-3.85
772.585	C43H79O8P||C43H79O8P||C43H79O8P||C43H79O8P||C43H79O8P||C43H79O8P||C43H79O8P||C43H79O8P||C43H79O8P||C43H79O8P||C43H79O8P||C43H79O8P||C43H82NO8P||C43H82NO8P||C43H82NO8P||C43H82NO8P||C43H82NO8P||C43H82NO8P||C43H82NO8P||C43H82NO8P||C43H82NO8P||C43H82NO8P||C43H82NO8P||C43H82NO8P||C43H82NO8P||C43H82NO8P||C43H82NO8P||C43H82NO8P||C43H82NO8P||C43H82NO8P||C43H82NO8P||C43H82NO8P||C43H82NO8P||C43H82NO8P||C43…	[M+NH4]+||[M+NH4]+||[M+NH4]+||[M+NH4]+||[M+NH4]+||[M+NH4]+||[M+NH4]+||[M+NH4]+||[M+NH4]+||[M+NH4]+||[M+NH4]+||[M+NH4]+||[M+H]+||[M+H]+||[M+H]+||[M+H]+||[M+H]+||[M+H]+||[M+H]+||[M+H]+||[M+H]+||[M+H]+||[M+H]+||[M+H]+||[M+H]+||[M+H]+||[M+H]+||[M+H]+||[M+H]+||[M+H]+||[M+H]+||[M+H]+||[M+H]+||[M+H]+||[M+H]+||[M+H]+||[M+H]+||[M+H]+||[M+H]+||[M+H]+||[M+H]+||[M+H]+	PA(18:1(9Z)/22:2(13Z,16Z))||PA(18:2(9Z,12Z)/22:1(11Z))||PA(18:3(6Z,9Z,12Z)/22:0)||PA(18:3(9Z,12Z,15Z)/22:0)||PA(20:0/20:3(8Z,11Z,14Z))||PA(20:1(11Z)/20:2(11Z,14Z))||PA(20:2(11Z,14Z)/20:1(11Z))||PA(20:3(8Z,11Z,14Z)/20:0)||PA(22:0/18:3(6Z,9Z,12Z))||PA(22:0/18:3(9Z,12Z,15Z))||PA(22:1(11Z)/18:2(9Z,12Z))||PA(22:2(13Z,16Z)/18:1(9Z))||PC(13:0/22:2(13Z,16Z))||PC(15:0/20:2(11Z,14Z))||PC(15:1(9Z)/20:1(11Z)…	LMGP10010336||LMGP10010361||LMGP10010390||LMGP10010418||LMGP10010520||LMGP10010546||LMGP10010576||LMGP10010606||LMGP10010710||LMGP10010711||LMGP10010737||LMGP10010767||LMGP01011360||LMGP01011422||LMGP01011451||LMGP01011487||LMGP01011505||LMGP01011532||LMGP01011561||LMGP01011587||LMGP01011601||LMGP01011621||LMGP01011763||LMGP01011810||LMGP01011839||LMGP01012036||LMGP02010513||LMGP02010536||LMGP020…	-0.44||-0.44||-0.44||-0.44||-0.44||-0.44||-0.44||-0.44||-0.44||-0.44||-0.44||-0.44||-0.44||-0.44||-0.44||-0.44||-0.44||-0.44||-0.44||-0.44||-0.44||-0.44||-0.44||-0.44||-0.44||-0.44||-0.44||-0.44||-0.44||-0.44||-0.44||-0.44||-0.44||-0.44||-0.44||-0.44||-0.44||-0.44||-0.44||-0.44||-0.44||-0.44
772.621	C44H86NO7P||C44H86NO7P||C44H86NO7P||C44H86NO7P||C44H86NO7P||C44H86NO7P||C44H86NO7P||C44H86NO7P||C44H86NO7P||C44H86NO7P	[M+H]+||[M+H]+||[M+H]+||[M+H]+||[M+H]+||[M+H]+||[M+H]+||[M+H]+||[M+H]+||[M+H]+	PC(O-16:0/20:2(11Z,14Z))||PC(O-18:0/18:2(9Z,12Z))||PC(O-18:1(9Z)/18:1(11Z))||PC(P-16:0/20:1(11Z))||PC(P-18:0/18:1(11Z))||PC(P-18:0/18:1(9Z))||PC(P-18:1(11Z)/18:0)||PC(P-18:1(9Z)/18:0)||PC(P-20:0/16:1(9Z))||PE(P-20:0/19:1(9Z))	LMGP01020188||LMGP01020203||LMGP01020263||LMGP01030037||LMGP01030130||LMGP01030013||LMGP01030136||LMGP01030146||LMGP01030081||LMGP02030080	-0.6||-0.6||-0.6||-0.6||-0.6||-0.6||-0.6||-0.6||-0.6||-0.6
773.509	C43H75O8P||C43H75O8P||C43H75O8P||C43H75O8P||C43H75O8P||C43H75O8P||C43H75O8P||C43H75O8P||C43H75O8P||C43H75O8P||C43H75O8P||C43H75O8P||C43H75O8P||C43H75O8P||C40H70NO10P||C40H70NO10P||C40H70NO10P||C40H70NO10P||C40H70NO10P||C40H70NO10P||C40H70NO10P||C40H70NO10P||C40H70NO10P||C40H70NO10P||C40H70NO10P||C40H70NO10P||C40H70NO10P||C45H73O8P||C45H73O8P||C45H73O8P||C45H73O8P	[M+Na]+||[M+Na]+||[M+Na]+||[M+Na]+||[M+Na]+||[M+Na]+||[M+Na]+||[M+Na]+||[M+Na]+||[M+Na]+||[M+Na]+||[M+Na]+||[M+Na]+||[M+Na]+||[M+NH4]+||[M+NH4]+||[M+NH4]+||[M+NH4]+||[M+NH4]+||[M+NH4]+||[M+NH4]+||[M+NH4]+||[M+NH4]+||[M+NH4]+||[M+NH4]+||[M+NH4]+||[M+NH4]+||[M+H]+||[M+H]+||[M+H]+||[M+H]+	PA(18:1(9Z)/22:4(7Z,10Z,13Z,16Z))||PA(18:3(6Z,9Z,12Z)/22:2(13Z,16Z))||PA(18:3(9Z,12Z,15Z)/22:2(13Z,16Z))||PA(18:4(6Z,9Z,12Z,15Z)/22:1(11Z))||PA(20:0/20:5(5Z,8Z,11Z,14Z,17Z))||PA(20:1(11Z)/20:4(5Z,8Z,11Z,14Z))||PA(20:2(11Z,14Z)/20:3(8Z,11Z,14Z))||PA(20:3(8Z,11Z,14Z)/20:2(11Z,14Z))||PA(20:4(5Z,8Z,11Z,14Z)/20:1(11Z))||PA(20:5(5Z,8Z,11Z,14Z,17Z)/20:0)||PA(22:1(11Z)/18:4(6Z,9Z,12Z,15Z))||PA(22:2(13Z,1…	LMGP10010337||LMGP10010392||LMGP10010420||LMGP10010450||LMGP10010521||LMGP10010548||LMGP10010578||LMGP10010608||LMGP10010637||LMGP10010665||LMGP10010740||LMGP10010769||LMGP10010770||LMGP10010798||LMGP03010067||LMGP03010923||LMGP03010130||LMGP03010904||LMGP03010212||LMGP03010213||LMGP03010890||LMGP03010373||LMGP03010403||LMGP03010431||LMGP03010592||LMGP03010622||LMGP03010787||LMGP10010586||LMGP100…	-0.47||-0.47||-0.47||-0.47||-0.47||-0.47||-0.47||-0.47||-0.47||-0.47||-0.47||-0.47||-0.47||-0.47||1.63||1.63||1.63||1.63||1.63||1.63||1.63||1.63||1.63||1.63||1.63||1.63||1.63||-3.58||-3.58||-3.58||-3.58
774.577	C46H80NO6P	[M+H]+	1-(6-[3]-ladderane-hexanyl)-2-(8-[3]-ladderane-octanyl)-sn-glycerophosphocholine	LMGP01040090	-3.79
774.6	C43H81O8P||C43H81O8P||C43H81O8P||C43H81O8P||C43H81O8P||C43H81O8P||C43H81O8P||C43H81O8P||C43H81O8P||C43H84NO8P||C43H84NO8P||C43H84NO8P||C43H84NO8P||C43H84NO8P||C43H84NO8P||C43H84NO8P||C43H84NO8P||C43H84NO8P||C43H84NO8P||C43H84NO8P||C43H84NO8P||C43H84NO8P||C43H84NO8P||C43H84NO8P||C43H84NO8P||C43H84NO8P||C43H84NO8P||C43H84NO8P||C43H84NO8P||C43H84NO8P||C43H84NO8P||C43H84NO8P||C43H84NO8P||C43H84NO8P||…	[M+NH4]+||[M+NH4]+||[M+NH4]+||[M+NH4]+||[M+NH4]+||[M+NH4]+||[M+NH4]+||[M+NH4]+||[M+NH4]+||[M+H]+||[M+H]+||[M+H]+||[M+H]+||[M+H]+||[M+H]+||[M+H]+||[M+H]+||[M+H]+||[M+H]+||[M+H]+||[M+H]+||[M+H]+||[M+H]+||[M+H]+||[M+H]+||[M+H]+||[M+H]+||[M+H]+||[M+H]+||[M+H]+||[M+H]+||[M+H]+||[M+H]+||[M+H]+||[M+H]+||[M+H]+||[M+H]+||[M+H]+||[M+H]+||[M+H]+||[M+H]+	PA(18:0/22:2(13Z,16Z))||PA(18:1(9Z)/22:1(11Z))||PA(18:2(9Z,12Z)/22:0)||PA(20:0/20:2(11Z,14Z))||PA(20:1(11Z)/20:1(11Z))||PA(20:2(11Z,14Z)/20:0)||PA(22:0/18:2(9Z,12Z))||PA(22:1(11Z)/18:1(9Z))||PA(22:2(13Z,16Z)/18:0)||PC(13:0/22:1(11Z))||PC(14:1(9Z)/21:0)||PC(15:0/20:1(11Z))||PC(15:1(9Z)/20:0)||PC(16:0/19:1(9Z))||PC(16:1(9Z)/19:0)||PC(17:0/18:1(9Z))||PC(17:1(9Z)/18:0)||PC(18:0/17:1(9Z))||PC(18:1(9Z)…	LMGP10010319||LMGP10010335||LMGP10010360||LMGP10010949||LMGP10010859||LMGP10010575||LMGP10010709||LMGP10010736||LMGP10010766||LMGP01011359||LMGP01011403||LMGP01011421||LMGP01011450||LMGP01011467||LMGP01011486||LMGP01010711||LMGP01011531||LMGP01011586||LMGP01011600||LMGP01011734||LMGP01011762||LMGP01011789||LMGP01011809||LMGP01011955||LMGP01012005||LMGP02010512||LMGP02010136||LMGP02010535||LMGP020…	-0.8||-0.8||-0.8||-0.8||-0.8||-0.8||-0.8||-0.8||-0.8||-0.8||-0.8||-0.8||-0.8||-0.8||-0.8||-0.8||-0.8||-0.8||-0.8||-0.8||-0.8||-0.8||-0.8||-0.8||-0.8||-0.8||-0.8||-0.8||-0.8||-0.8||-0.8||-0.8||-0.8||-0.8||-0.8||-0.8||-0.8||-0.8||-0.8||-0.8||-0.8
776.592	C44H84NO6P	[M+Na]+	1-hexadecanyl-2-(8-[3]-ladderane-octanyl)-sn-glycerophosphocholine	LMGP01040092	-1.39
778.535	C42H78NO8P||C42H78NO8P||C42H78NO8P||C42H78NO8P||C42H78NO8P||C42H78NO8P||C42H78NO8P||C42H78NO8P||C42H78NO8P||C42H78NO8P||C42H78NO8P||C42H78NO8P||C42H78NO8P||C42H78NO8P||C42H78NO8P||C42H78NO8P||C42H78NO8P||C42H78NO8P||C42H78NO8P||C42H78NO8P||C42H78NO8P||C42H78NO8P||C42H78NO8P||C42H78NO8P||C42H78NO8P||C42H78NO8P||C42H78NO8P||C42H78NO8P||C44H73O8P||C44H73O8P||C44H73O8P||C44H76NO8P||C44H76NO8P||C44H76…	[M+Na]+||[M+Na]+||[M+Na]+||[M+Na]+||[M+Na]+||[M+Na]+||[M+Na]+||[M+Na]+||[M+Na]+||[M+Na]+||[M+Na]+||[M+Na]+||[M+Na]+||[M+Na]+||[M+Na]+||[M+Na]+||[M+Na]+||[M+Na]+||[M+Na]+||[M+Na]+||[M+Na]+||[M+Na]+||[M+Na]+||[M+Na]+||[M+Na]+||[M+Na]+||[M+Na]+||[M+Na]+||[M+NH4]+||[M+NH4]+||[M+NH4]+||[M+H]+||[M+H]+||[M+H]+||[M+H]+||[M+H]+||[M+H]+||[M+H]+||[M+H]+||[M+H]+||[M+H]+||[M+H]+||[M+H]+||[M+H]+||[M+H]+||[M+H]…	PC(14:0/20:3(5Z,8Z,11Z))||PC(14:0/20:3(8Z,11Z,14Z))||PC(14:1(9Z)/20:2(11Z,14Z))||PC(16:0/18:3(6Z,9Z,12Z))||PC(16:0/18:3(9Z,12Z,15Z))||PC(16:1(9Z)/18:2(9Z,12Z))||PC(17:1(9Z)/17:2(9Z,12Z))||PC(17:2(9Z,12Z)/17:1(9Z))||PC(18:2(9Z,12Z)/16:1(9Z))||PC(18:3(6Z,9Z,12Z)/16:0)||PC(18:3(9Z,12Z,15Z)/16:0)||PC(20:2(11Z,14Z)/14:1(9Z))||PC(20:3(5Z,8Z,11Z)/14:0)||PC(20:3(8Z,11Z,14Z)/14:0)||PE(15:1(9Z)/22:2(13Z,16…	LMGP01012127||LMGP01011374||LMGP01011399||LMGP01010598||LMGP01010601||LMGP01010690||LMGP01011530||LMGP01011560||LMGP01011620||LMGP01011646||LMGP01011677||LMGP01011838||LMGP01012192||LMGP01011868||LMGP02010502||LMGP02010554||LMGP02010581||LMGP02010610||LMGP02010668||LMGP02010696||LMGP02010724||LMGP02010777||LMGP02010778||LMGP02010806||LMGP02010851||LMGP02010880||LMGP02010910||LMGP02011076||LMGP040…	-0.64||-0.64||-0.64||-0.64||-0.64||-0.64||-0.64||-0.64||-0.64||-0.64||-0.64||-0.64||-0.64||-0.64||-0.64||-0.64||-0.64||-0.64||-0.64||-0.64||-0.64||-0.64||-0.64||-0.64||-0.64||-0.64||-0.64||-0.64||-3.73||-3.73||-3.73||-3.73||-3.73||-3.73||-3.73||-3.73||-3.73||-3.73||-3.73||-3.73||-3.73||-3.73||-3.73||-3.73||-3.73||-3.73||-3.73||-3.73||-3.73||-3.73||-3.73||-3.73||-3.73||-3.73
779.481	C41H73O10P||C41H73O10P||C41H73O10P||C41H73O10P||C41H73O10P||C41H73O10P||C41H73O10P||C41H73O10P||C41H73O10P||C41H73O10P||C41H73O10P||C41H73O10P||C41H73O10P||C41H73O10P	[M+Na]+||[M+Na]+||[M+Na]+||[M+Na]+||[M+Na]+||[M+Na]+||[M+Na]+||[M+Na]+||[M+Na]+||[M+Na]+||[M+Na]+||[M+Na]+||[M+Na]+||[M+Na]+	PG(13:0/22:4(7Z,10Z,13Z,16Z))||PG(15:0/20:4(5Z,8Z,11Z,14Z))||PG(15:1(9Z)/20:3(8Z,11Z,14Z))||PG(17:0/18:4(6Z,9Z,12Z,15Z))||PG(17:1(9Z)/18:3(6Z,9Z,12Z))||PG(17:1(9Z)/18:3(9Z,12Z,15Z))||PG(17:2(9Z,12Z)/18:2(9Z,12Z))||PG(18:2(9Z,12Z)/17:2(9Z,12Z))||PG(18:3(6Z,9Z,12Z)/17:1(9Z))||PG(18:3(9Z,12Z,15Z)/17:1(9Z))||PG(18:4(6Z,9Z,12Z,15Z)/17:0)||PG(20:3(8Z,11Z,14Z)/15:1(9Z))||PG(20:4(5Z,8Z,11Z,14Z)/15:0)||PG…	LMGP04010091||LMGP04010154||LMGP04010183||LMGP04010236||LMGP04010261||LMGP04010262||LMGP04010290||LMGP04010349||LMGP04010375||LMGP04010405||LMGP04010433||LMGP04010594||LMGP04010624||LMGP04010788	-2.9||-2.9||-2.9||-2.9||-2.9||-2.9||-2.9||-2.9||-2.9||-2.9||-2.9||-2.9||-2.9||-2.9
780.551	C42H80NO8P||C42H80NO8P||C42H80NO8P||C42H80NO8P||C42H80NO8P||C42H80NO8P||C42H80NO8P||C42H80NO8P||C42H80NO8P||C42H80NO8P||C42H80NO8P||C42H80NO8P||C42H80NO8P||C42H80NO8P||C42H80NO8P||C42H80NO8P||C42H80NO8P||C42H80NO8P||C42H80NO8P||C42H80NO8P||C42H80NO8P||C42H80NO8P||C42H80NO8P||C42H80NO8P||C42H80NO8P||C42H80NO8P||C42H80NO8P||C42H80NO8P||C42H80NO8P||C42H80NO8P||C42H80NO8P||C42H80NO8P||C42H80NO8P||C42…	[M+Na]+||[M+Na]+||[M+Na]+||[M+Na]+||[M+Na]+||[M+Na]+||[M+Na]+||[M+Na]+||[M+Na]+||[M+Na]+||[M+Na]+||[M+Na]+||[M+Na]+||[M+Na]+||[M+Na]+||[M+Na]+||[M+Na]+||[M+Na]+||[M+Na]+||[M+Na]+||[M+Na]+||[M+Na]+||[M+Na]+||[M+Na]+||[M+Na]+||[M+Na]+||[M+Na]+||[M+Na]+||[M+Na]+||[M+Na]+||[M+Na]+||[M+Na]+||[M+Na]+||[M+Na]+||[M+Na]+||[M+Na]+||[M+Na]+||[M+Na]+||[M+Na]+||[M+Na]+||[M+Na]+||[M+Na]+||[M+Na]+||[M+Na]+||[M+…	PC(12:0/22:2(13Z,16Z))||PC(14:0/20:2(11Z,14Z))||PC(14:1(9Z)/20:1(11Z))||PC(15:1(9Z)/19:1(9Z))||PC(16:0/18:2(10E,12Z))||PC(16:0/18:2(11Z,13Z))||PC(16:0/18:2(2E,4E))||PC(16:0/18:2(2Z,4Z))||PC(16:0/18:2(6Z,9Z))||PC(16:0/18:2(9E,11E))||PC(16:0/18:2(9E,11Z))||PC(16:0/18:2(9E,12E))||PC(16:0/18:2(9Z,12Z))||PC(16:1(2Z)/18:1(9Z))||PC(16:1(9Z)/18:1(11Z))||PC(16:1(9Z)/18:1(9Z))||PC(17:0/17:2(9Z,12Z))||PC(17…	LMGP01011336||LMGP01011373||LMGP01011398||LMGP01011449||LMGP01010585||LMGP01010586||LMGP01010587||LMGP01010588||LMGP01010589||LMGP01010590||LMGP01010591||LMGP01010592||LMGP01010594||LMGP01010678||LMGP01010687||LMGP01010688||LMGP01011504||LMGP01010727||LMGP01010728||LMGP01011559||LMGP01010745||LMGP01012147||LMGP01010887||LMGP01010920||LMGP01010926||LMGP01010932||LMGP01011761||LMGP01011808||LMGP010…	-0.46||-0.46||-0.46||-0.46||-0.46||-0.46||-0.46||-0.46||-0.46||-0.46||-0.46||-0.46||-0.46||-0.46||-0.46||-0.46||-0.46||-0.46||-0.46||-0.46||-0.46||-0.46||-0.46||-0.46||-0.46||-0.46||-0.46||-0.46||-0.46||-0.46||-0.46||-0.46||-0.46||-0.46||-0.46||-0.46||-0.46||-0.46||-0.46||-0.46||-0.46||-0.46||-0.46||-0.46||-0.46||-0.46||-3.53||-3.53||-3.54||-3.54||-3.54||-3.54||-3.54||-3.54||-3.54||-3.54||-3.54||…
782.558	C40H80NO11P||C40H80NO11P	[M+H]+||[M+H]+	PI-Cer(d18:0/16:0)||PI-Cer(d20:0/14:0)	LMSP03030006||LMSP03030152	4.53||4.53
782.568	C42H82NO8P||C42H82NO8P||C42H82NO8P||C42H82NO8P||C42H82NO8P||C42H82NO8P||C42H82NO8P||C42H82NO8P||C42H82NO8P||C42H82NO8P||C42H82NO8P||C42H82NO8P||C42H82NO8P||C42H82NO8P||C42H82NO8P||C42H82NO8P||C42H82NO8P||C42H82NO8P||C42H82NO8P||C42H82NO8P||C42H82NO8P||C42H82NO8P||C42H82NO8P||C42H82NO8P||C42H82NO8P||C42H82NO8P||C42H82NO8P||C42H82NO8P||C42H82NO8P||C42H82NO8P||C42H82NO8P||C42H82NO8P||C42H82NO8P||C42…	[M+Na]+||[M+Na]+||[M+Na]+||[M+Na]+||[M+Na]+||[M+Na]+||[M+Na]+||[M+Na]+||[M+Na]+||[M+Na]+||[M+Na]+||[M+Na]+||[M+Na]+||[M+Na]+||[M+Na]+||[M+Na]+||[M+Na]+||[M+Na]+||[M+Na]+||[M+Na]+||[M+Na]+||[M+Na]+||[M+Na]+||[M+Na]+||[M+Na]+||[M+Na]+||[M+Na]+||[M+Na]+||[M+Na]+||[M+Na]+||[M+Na]+||[M+Na]+||[M+Na]+||[M+Na]+||[M+Na]+||[M+Na]+||[M+NH4]+||[M+NH4]+||[M+NH4]+||[M+NH4]+||[M+H]+||[M+H]+||[M+H]+||[M+H]+||[M+…	PC(12:0/22:1(11Z))||PC(14:0/20:1(11Z))||PC(14:1(9Z)/20:0)||PC(15:0/19:1(9Z))||PC(15:1(9Z)/19:0)||PC(16:0/18:1(11E))||PC(16:0/18:1(11Z))||PC(16:0/18:1(6E))||PC(16:0/18:1(6Z))||PC(16:0/18:1(9E))||PC(16:0/18:1(9Z))||PC(16:1(9Z)/18:0)||PC(17:0/17:1(9Z))||PC(17:1(9Z)/17:0)||PC(18:0/16:1(9Z))||PC(18:1(11Z)/16:0)||PC(18:1(9Z)/16:0)||PC(19:0/15:1(9Z))||PC(19:1(9Z)/15:0)||PC(20:0/14:1(9Z))||PC(20:1(11Z)/1…	LMGP01011335||LMGP01011372||LMGP01011397||LMGP01011419||LMGP01011448||LMGP01010575||LMGP01010576||LMGP01010578||LMGP01010579||LMGP01010581||LMGP01010005||LMGP01011483||LMGP01011503||LMGP01011529||LMGP01010744||LMGP01012146||LMGP01010884||LMGP01011732||LMGP01011760||LMGP01011787||LMGP01011807||LMGP01012004||LMGP02010470||LMGP02010500||LMGP02010534||LMGP02010552||LMGP02010579||LMGP02010631||LMGP020…	0.76||0.76||0.76||0.76||0.76||0.76||0.76||0.76||0.76||0.76||0.76||0.76||0.76||0.76||0.76||0.76||0.76||0.76||0.76||0.76||0.76||0.76||0.76||0.76||0.76||0.76||0.76||0.76||0.76||0.76||0.76||0.76||0.76||0.76||0.76||0.76||-2.31||-2.31||-2.31||-2.31||-2.31||-2.31||-2.31||-2.31||-2.31||-2.31||-2.31||-2.31||-2.31||-2.31||-2.31||-2.31||-2.31||-2.31||-2.31||-2.31||-2.31||-2.31||-2.31||-2.31||-2.31||-2.31||-…
783.431	C37H67O15P	[M+H]+	PHODA-PI	LMGP20050001	2.49
783.513	C41H77O10P||C41H77O10P||C41H77O10P||C41H77O10P||C41H77O10P||C41H77O10P||C41H77O10P||C41H77O10P||C41H77O10P||C41H77O10P||C41H77O10P||C41H77O10P||C41H77O10P||C41H77O10P	[M+Na]+||[M+Na]+||[M+Na]+||[M+Na]+||[M+Na]+||[M+Na]+||[M+Na]+||[M+Na]+||[M+Na]+||[M+Na]+||[M+Na]+||[M+Na]+||[M+Na]+||[M+Na]+	PG(13:0/22:2(13Z,16Z))||PG(15:0/20:2(11Z,14Z))||PG(15:1(9Z)/20:1(11Z))||PG(16:1(9Z)/19:1(9Z))||PG(17:0/18:2(9Z,12Z))||PG(17:1(9Z)/18:1(9Z))||PG(17:2(9Z,12Z)/18:0)||PG(18:0/17:2(9Z,12Z))||PG(18:1(9Z)/17:1(9Z))||PG(18:2(9Z,12Z)/17:0)||PG(19:1(9Z)/16:1(9Z))||PG(20:1(11Z)/15:1(9Z))||PG(20:2(11Z,14Z)/15:0)||PG(22:2(13Z,16Z)/13:0)	LMGP04010090||LMGP04010152||LMGP04010181||LMGP04010215||LMGP04010233||LMGP04010259||LMGP04010288||LMGP04010314||LMGP04010328||LMGP04010347||LMGP04010487||LMGP04010533||LMGP04010562||LMGP04010757	-2.42||-2.42||-2.42||-2.42||-2.42||-2.42||-2.42||-2.42||-2.42||-2.42||-2.42||-2.42||-2.42||-2.42
784.486	C43H72NO8P||C43H72NO8P||C43H72NO8P||C43H72NO8P||C43H72NO8P||C43H72NO8P||C43H72NO8P||C43H72NO8P||C43H72NO8P||C43H72NO8P	[M+Na]+||[M+Na]+||[M+Na]+||[M+Na]+||[M+Na]+||[M+Na]+||[M+Na]+||[M+Na]+||[M+Na]+||[M+Na]+	PE(16:1(9Z)/22:6(4Z,7Z,10Z,13Z,16Z,19Z))||PE(18:2(9Z,12Z)/20:5(5Z,8Z,11Z,14Z,17Z))||PE(18:3(6Z,9Z,12Z)/20:4(5Z,8Z,11Z,14Z))||PE(18:3(9Z,12Z,15Z)/20:4(5Z,8Z,11Z,14Z))||PE(18:4(6Z,9Z,12Z,15Z)/20:3(8Z,11Z,14Z))||PE(20:3(8Z,11Z,14Z)/18:4(6Z,9Z,12Z,15Z))||PE(20:4(5Z,8Z,11Z,14Z)/18:3(6Z,9Z,12Z))||PE(20:4(5Z,8Z,11Z,14Z)/18:3(9Z,12Z,15Z))||PE(20:5(5Z,8Z,11Z,14Z,17Z)/18:2(9Z,12Z))||PE(22:6(4Z,7Z,10Z,13Z,1…	LMGP02011216||LMGP02010673||LMGP02010702||LMGP02010730||LMGP02010760||LMGP02010918||LMGP02010946||LMGP02010947||LMGP02010974||LMGP02011138	-3.78||-3.78||-3.78||-3.78||-3.78||-3.78||-3.78||-3.78||-3.78||-3.78
784.584	C44H79O8P||C44H79O8P||C44H79O8P||C44H79O8P||C44H82NO8P||C44H82NO8P||C44H82NO8P||C44H82NO8P||C44H82NO8P||C44H82NO8P||C44H82NO8P||C44H82NO8P||C44H82NO8P||C44H82NO8P||C44H82NO8P||C44H82NO8P||C44H82NO8P||C44H82NO8P||C44H82NO8P||C44H82NO8P||C44H82NO8P||C44H82NO8P||C44H82NO8P||C44H82NO8P||C44H82NO8P||C44H82NO8P||C44H82NO8P||C44H82NO8P||C44H82NO8P||C44H82NO8P||C44H82NO8P||C44H82NO8P||C44H82NO8P||C44H82N…	[M+NH4]+||[M+NH4]+||[M+NH4]+||[M+NH4]+||[M+H]+||[M+H]+||[M+H]+||[M+H]+||[M+H]+||[M+H]+||[M+H]+||[M+H]+||[M+H]+||[M+H]+||[M+H]+||[M+H]+||[M+H]+||[M+H]+||[M+H]+||[M+H]+||[M+H]+||[M+H]+||[M+H]+||[M+H]+||[M+H]+||[M+H]+||[M+H]+||[M+H]+||[M+H]+||[M+H]+||[M+H]+||[M+H]+||[M+H]+||[M+H]+||[M+H]+||[M+H]+||[M+Na]+||[M+Na]+||[M+Na]+||[M+Na]+||[M+Na]+||[M+Na]+||[M+Na]+||[M+Na]+||[M+Na]+||[M+Na]+||[M+Na]+||[M+N…	PA(19:0/22:4(7Z,10Z,13Z,16Z))||PA(20:4(5Z,8Z,11Z,14Z)/21:0)||PA(21:0/20:4(5Z,8Z,11Z,14Z))||PA(22:4(7Z,10Z,13Z,16Z)/19:0)||PC(14:1(9Z)/22:2(13Z,16Z))||PC(16:0/20:3(5Z,8Z,11Z))||PC(16:0/20:3(8E,11E,14E))||PC(16:0/20:3(8Z,11Z,14Z))||PC(16:1(9Z)/20:2(11Z,14Z))||PC(17:2(9Z,12Z)/19:1(9Z))||PC(18:0/18:3(6Z,9Z,12Z))||PC(18:0/18:3(9Z,12Z,15Z))||PC(18:1(11Z)/18:2(9Z,12Z))||PC(18:1(9Z)/18:2(6Z,9Z))||PC(18:1…	LMGP10010476||LMGP10010641||LMGP10010695||LMGP10010803||LMGP01011406||LMGP01010622||LMGP01010624||LMGP01010627||LMGP01011490||LMGP01011568||LMGP01011588||LMGP01011589||LMGP01012149||LMGP01010893||LMGP01010895||LMGP01012168||LMGP01011624||LMGP01011651||LMGP01011682||LMGP01011766||LMGP01011842||LMGP01012194||LMGP01011872||LMGP01012038||LMGP02010588||LMGP02010617||LMGP02010704||LMGP02010732||LMGP020…	-0.76||-0.76||-0.76||-0.76||-0.76||-0.76||-0.76||-0.76||-0.76||-0.76||-0.76||-0.76||-0.76||-0.76||-0.76||-0.76||-0.76||-0.76||-0.76||-0.76||-0.76||-0.76||-0.76||-0.76||-0.76||-0.76||-0.76||-0.76||-0.76||-0.76||-0.76||-0.76||-0.76||-0.76||-0.76||-0.76||2.3||2.3||2.3||2.3||2.3||2.3||2.3||2.3||2.3||2.3||2.3||2.3||2.3||2.3||2.3||2.3||2.3||2.3||2.3||2.3||2.3||2.3
785.653	C45H86NO6P||C45H89N2O6P||C45H89N2O6P||C45H89N2O6P	[M+NH4]+||[M+H]+||[M+H]+||[M+H]+	1-(10-methylhexadecanyl)-2-(8-[3]-ladderane-octanyl)-sn-glycerophosphocholine||SM(d16:1/24:1)||SM(d18:1/22:1)||SM(d18:2/22:0)	LMGP01040093||LMSP03010071||LMSP03010072||LMSP03010092	-0.53||-0.54||-0.54||-0.54
786.502	C43H74NO8P||C43H74NO8P||C43H74NO8P||C43H74NO8P||C43H74NO8P||C43H74NO8P||C43H74NO8P||C43H74NO8P||C43H74NO8P||C43H74NO8P||C43H74NO8P||C43H74NO8P||C43H74NO8P||C43H74NO8P||C43H74NO8P||C43H74NO8P||C43H74NO8P||C43H74NO8P||C43H74NO8P	[M+Na]+||[M+Na]+||[M+Na]+||[M+Na]+||[M+Na]+||[M+Na]+||[M+Na]+||[M+Na]+||[M+Na]+||[M+Na]+||[M+Na]+||[M+Na]+||[M+Na]+||[M+Na]+||[M+Na]+||[M+Na]+||[M+Na]+||[M+Na]+||[M+Na]+	PC(13:0/22:6(4Z,7Z,10Z,13Z,16Z,19Z))||PC(15:1(9Z)/20:5(5Z,8Z,11Z,14Z,17Z))||PC(17:2(9Z,12Z)/18:4(6Z,9Z,12Z,15Z))||PC(18:4(6Z,9Z,12Z,15Z)/17:2(9Z,12Z))||PC(20:5(5Z,8Z,11Z,14Z,17Z)/15:1(9Z))||PC(22:6(4Z,7Z,10Z,13Z,16Z,19Z)/13:0)||PE(16:0/22:6(4Z,7Z,10Z,13Z,16Z,19Z))||PE(18:1(9Z)/20:5(5Z,8Z,11Z,14Z,17Z))||PE(18:2(9Z,12Z)/20:4(5Z,8Z,11Z,14Z))||PE(18:3(6Z,9Z,12Z)/20:3(8Z,11Z,14Z))||PE(18:3(9Z,12Z,15Z)…	LMGP01011362||LMGP01011455||LMGP01011566||LMGP01011710||LMGP01011931||LMGP01012098||LMGP02010095||LMGP02011195||LMGP02011192||LMGP02010701||LMGP02010729||LMGP02010759||LMGP02010887||LMGP02010916||LMGP02010917||LMGP02010945||LMGP02011172||LMGP02011161||LMGP20020014	-3.6||-3.6||-3.6||-3.6||-3.6||-3.6||-3.6||-3.6||-3.6||-3.6||-3.6||-3.6||-3.6||-3.6||-3.6||-3.6||-3.6||-3.6||-3.6
786.6	C44H81O8P||C44H81O8P||C44H81O8P||C44H81O8P||C44H84NO8P||C44H84NO8P||C44H84NO8P||C44H84NO8P||C44H84NO8P||C44H84NO8P||C44H84NO8P||C44H84NO8P||C44H84NO8P||C44H84NO8P||C44H84NO8P||C44H84NO8P||C44H84NO8P||C44H84NO8P||C44H84NO8P||C44H84NO8P||C44H84NO8P||C44H84NO8P||C44H84NO8P||C44H84NO8P||C44H84NO8P||C44H84NO8P||C44H84NO8P||C44H84NO8P||C44H84NO8P||C44H84NO8P||C44H84NO8P||C44H84NO8P||C44H84NO8P||C44H84N…	[M+NH4]+||[M+NH4]+||[M+NH4]+||[M+NH4]+||[M+H]+||[M+H]+||[M+H]+||[M+H]+||[M+H]+||[M+H]+||[M+H]+||[M+H]+||[M+H]+||[M+H]+||[M+H]+||[M+H]+||[M+H]+||[M+H]+||[M+H]+||[M+H]+||[M+H]+||[M+H]+||[M+H]+||[M+H]+||[M+H]+||[M+H]+||[M+H]+||[M+H]+||[M+H]+||[M+H]+||[M+H]+||[M+H]+||[M+H]+||[M+H]+||[M+H]+||[M+H]+||[M+H]+||[M+H]+||[M+H]+||[M+H]+||[M+H]+||[M+H]+||[M+H]+||[M+H]+||[M+H]+||[M+H]+||[M+H]+||[M+H]+||[M+H]+|…	PA(19:1(9Z)/22:2(13Z,16Z))||PA(20:3(8Z,11Z,14Z)/21:0)||PA(21:0/20:3(8Z,11Z,14Z))||PA(22:2(13Z,16Z)/19:1(9Z))||PC(14:0/22:2(13Z,16Z))||PC(14:1(9Z)/22:1(11Z))||PC(14:1(9Z)/22:1(13Z))||PC(16:0/20:2(11Z,14Z))||PC(16:1(9Z)/20:1(11Z))||PC(17:1(9Z)/19:1(9Z))||PC(17:2(9Z,12Z)/19:0)||PC(18:0/18:2(10Z,12Z))||PC(18:0/18:2(2E,4E))||PC(18:0/18:2(6Z,9Z))||PC(18:0/18:2(9Z,12Z))||PC(18:1(10Z)/18:1(10Z))||PC(18:1…	LMGP10010506||LMGP10010612||LMGP10010694||LMGP10010773||LMGP01011377||LMGP01011405||LMGP01012133||LMGP01011469||LMGP01011489||LMGP01011538||LMGP01011567||LMGP01010764||LMGP01010765||LMGP01010766||LMGP01010768||LMGP01010836||LMGP01010837||LMGP01010841||LMGP01012148||LMGP01010849||LMGP01010851||LMGP01010853||LMGP01010855||LMGP01010857||LMGP01010858||LMGP01010860||LMGP01010862||LMGP01010966||LMGP010…	-0.78||-0.78||-0.78||-0.78||-0.78||-0.78||-0.78||-0.78||-0.78||-0.78||-0.78||-0.78||-0.78||-0.78||-0.78||-0.78||-0.78||-0.78||-0.78||-0.78||-0.78||-0.78||-0.78||-0.78||-0.78||-0.78||-0.78||-0.78||-0.78||-0.78||-0.78||-0.78||-0.78||-0.78||-0.78||-0.78||-0.78||-0.78||-0.78||-0.78||-0.78||-0.78||-0.78||-0.78||-0.78||-0.78||-0.78||-0.78||-0.78||-0.78||-0.78||-0.78||-0.78||-0.78||-0.78||-0.78
787.668	C45H91N2O6P||C45H91N2O6P	[M+H]+||[M+H]+	SM(d16:1/24:0)||SM(d18:1/22:0)	LMSP03010073||LMSP03010006	-1.05||-1.05
788.481	C42H72NO9P	[M+Na]+	PS(P-16:0/20:5(5Z,8Z,11Z,14Z,17Z))	LMGP03030022	-3.61
788.543	C42H75O10P||C42H75O10P||C42H75O10P||C42H75O10P||C42H75O10P||C42H75O10P||C42H75O10P||C42H75O10P||C42H75O10P||C42H75O10P||C42H75O10P||C42H75O10P||C42H75O10P||C42H78NO10P||C42H78NO10P||C42H78NO10P||C42H78NO10P||C42H78NO10P||C42H78NO10P||C42H78NO10P||C42H78NO10P||C42H78NO10P||C42H78NO10P||C42H78NO10P||C42H78NO10P||C42H78NO10P||C42H78NO10P||C42H78NO10P	[M+NH4]+||[M+NH4]+||[M+NH4]+||[M+NH4]+||[M+NH4]+||[M+NH4]+||[M+NH4]+||[M+NH4]+||[M+NH4]+||[M+NH4]+||[M+NH4]+||[M+NH4]+||[M+NH4]+||[M+H]+||[M+H]+||[M+H]+||[M+H]+||[M+H]+||[M+H]+||[M+H]+||[M+H]+||[M+H]+||[M+H]+||[M+H]+||[M+H]+||[M+H]+||[M+H]+||[M+H]+	PG(14:0/22:4(7Z,10Z,13Z,16Z))||PG(16:0/20:4(5Z,8Z,11Z,14Z))||PG(16:1(9Z)/20:3(8Z,11Z,14Z))||PG(18:0/18:4(6Z,9Z,12Z,15Z))||PG(18:1(9Z)/18:3(6Z,9Z,12Z))||PG(18:1(9Z)/18:3(9Z,12Z,15Z))||PG(18:2(9Z,12Z)/18:2(9Z,12Z))||PG(18:3(6Z,9Z,12Z)/18:1(9Z))||PG(18:3(9Z,12Z,15Z)/18:1(9Z))||PG(18:4(6Z,9Z,12Z,15Z)/18:0)||PG(20:3(8Z,11Z,14Z)/16:1(9Z))||PG(20:4(5Z,8Z,11Z,14Z)/16:0)||PG(22:4(7Z,10Z,13Z,16Z)/14:0)||PS…	LMGP04010108||LMGP04010036||LMGP04010219||LMGP04010886||LMGP04010330||LMGP04010880||LMGP04010956||LMGP04010378||LMGP04010874||LMGP04010436||LMGP04010596||LMGP04010859||LMGP04010789||LMGP03010107||LMGP03010135||LMGP03010197||LMGP03010217||LMGP03010265||LMGP03010294||LMGP03010031||LMGP03010030||LMGP03010876||LMGP03010461||LMGP03010489||LMGP03010535||LMGP03010564||LMGP03010728||LMGP03010758	-0.65||-0.65||-0.65||-0.65||-0.65||-0.65||-0.65||-0.65||-0.65||-0.65||-0.65||-0.65||-0.65||-0.65||-0.65||-0.65||-0.65||-0.65||-0.65||-0.65||-0.65||-0.65||-0.65||-0.65||-0.65||-0.65||-0.65||-0.65
788.616	C44H83O8P||C44H83O8P||C44H83O8P||C44H83O8P||C44H83O8P||C44H83O8P||C44H86NO8P||C44H86NO8P||C44H86NO8P||C44H86NO8P||C44H86NO8P||C44H86NO8P||C44H86NO8P||C44H86NO8P||C44H86NO8P||C44H86NO8P||C44H86NO8P||C44H86NO8P||C44H86NO8P||C44H86NO8P||C44H86NO8P||C44H86NO8P||C44H86NO8P||C44H86NO8P||C44H86NO8P||C44H86NO8P||C44H86NO8P||C44H86NO8P||C44H86NO8P||C44H86NO8P||C44H86NO8P||C44H86NO8P||C44H86NO8P||C44H86NO8…	[M+NH4]+||[M+NH4]+||[M+NH4]+||[M+NH4]+||[M+NH4]+||[M+NH4]+||[M+H]+||[M+H]+||[M+H]+||[M+H]+||[M+H]+||[M+H]+||[M+H]+||[M+H]+||[M+H]+||[M+H]+||[M+H]+||[M+H]+||[M+H]+||[M+H]+||[M+H]+||[M+H]+||[M+H]+||[M+H]+||[M+H]+||[M+H]+||[M+H]+||[M+H]+||[M+H]+||[M+H]+||[M+H]+||[M+H]+||[M+H]+||[M+H]+||[M+H]+||[M+H]+||[M+H]+||[M+H]+||[M+H]+||[M+H]+||[M+H]+||[M+H]+	PA(19:0/22:2(13Z,16Z))||PA(19:1(9Z)/22:1(11Z))||PA(20:2(11Z,14Z)/21:0)||PA(21:0/20:2(11Z,14Z))||PA(22:1(11Z)/19:1(9Z))||PA(22:2(13Z,16Z)/19:0)||PC(14:0/22:1(11Z))||PC(14:0/22:1(13Z))||PC(14:1(9Z)/22:0)||PC(15:1(9Z)/21:0)||PC(16:0/20:1(11Z))||PC(16:1(9Z)/20:0)||PC(17:0/19:1(9Z))||PC(17:1(9Z)/19:0)||PC(18:0/18:1(11Z))||PC(18:0/18:1(12Z))||PC(18:0/18:1(13Z))||PC(18:0/18:1(16Z))||PC(18:0/18:1(6Z))||P…	LMGP10010475||LMGP10010505||LMGP10010581||LMGP10010693||LMGP10010742||LMGP10010772||LMGP01011376||LMGP01012129||LMGP01011404||LMGP01011456||LMGP01011468||LMGP01011488||LMGP01011510||LMGP01011537||LMGP01010750||LMGP01010751||LMGP01010753||LMGP01010754||LMGP01010756||LMGP01010758||LMGP01010759||LMGP01010761||LMGP01010840||LMGP01010888||LMGP01011736||LMGP01011764||LMGP01011790||LMGP01011811||LMGP010…	-1.02||-1.02||-1.02||-1.02||-1.02||-1.02||-1.02||-1.02||-1.02||-1.02||-1.02||-1.02||-1.02||-1.02||-1.02||-1.02||-1.02||-1.02||-1.02||-1.02||-1.02||-1.02||-1.02||-1.02||-1.02||-1.02||-1.02||-1.02||-1.02||-1.02||-1.02||-1.02||-1.02||-1.02||-1.02||-1.02||-1.02||-1.02||-1.02||-1.02||-1.02||-1.02
789.547	C46H77O8P	[M+H]+	1-(8-[5]-ladderane-octanyl)-2-(8-[3]-ladderane-octanyl)-sn-glycero-3-phospho-(1-sn-glycerol)	LMGP04040004	4.6
789.61	C44H84O11||C44H84O11||C43H82NO8P||C43H82NO8P||C43H82NO8P||C43H82NO8P||C43H82NO8P||C43H82NO8P||C43H82NO8P||C43H82NO8P||C43H82NO8P||C43H82NO8P||C43H82NO8P||C43H82NO8P||C43H82NO8P||C43H82NO8P||C43H82NO8P||C43H82NO8P||C43H82NO8P||C43H82NO8P||C43H82NO8P||C43H82NO8P||C43H82NO8P||C43H82NO8P||C43H82NO8P||C43H82NO8P||C43H82NO8P||C43H82NO8P||C43H82NO8P||C43H82NO8P||C43H82NO8P||C43H82NO8P	[M+H]+||[M+H]+||[M+NH4]+||[M+NH4]+||[M+NH4]+||[M+NH4]+||[M+NH4]+||[M+NH4]+||[M+NH4]+||[M+NH4]+||[M+NH4]+||[M+NH4]+||[M+NH4]+||[M+NH4]+||[M+NH4]+||[M+NH4]+||[M+NH4]+||[M+NH4]+||[M+NH4]+||[M+NH4]+||[M+NH4]+||[M+NH4]+||[M+NH4]+||[M+NH4]+||[M+NH4]+||[M+NH4]+||[M+NH4]+||[M+NH4]+||[M+NH4]+||[M+NH4]+||[M+NH4]+||[M+NH4]+	Bastimolide A||Bastimolide B||PC(13:0/22:2(13Z,16Z))||PC(15:0/20:2(11Z,14Z))||PC(15:1(9Z)/20:1(11Z))||PC(16:1(9Z)/19:1(9Z))||PC(17:0/18:2(9Z,12Z))||PC(17:1(9Z)/18:1(9Z))||PC(17:2(9Z,12Z)/18:0)||PC(18:0/17:2(9Z,12Z))||PC(18:1(9Z)/17:1(9Z))||PC(18:2(9Z,12Z)/17:0)||PC(19:1(9Z)/16:1(9Z))||PC(20:1(11Z)/15:1(9Z))||PC(20:2(11Z,14Z)/15:0)||PC(22:2(13Z,16Z)/13:0)||PE(16:0/22:2(13Z,16Z))||PE(16:1(9Z)/22:1(…	LMFA07040112||LMFA07040111||LMGP01011360||LMGP01011422||LMGP01011451||LMGP01011487||LMGP01011505||LMGP01011532||LMGP01011561||LMGP01011587||LMGP01011601||LMGP01011621||LMGP01011763||LMGP01011810||LMGP01011839||LMGP01012036||LMGP02010513||LMGP02010536||LMGP02010615||LMGP02010124||LMGP02010126||LMGP02010669||LMGP02010811||LMGP02010125||LMGP02010853||LMGP02010882||LMGP02010122||LMGP02010998||LMGP020…	1.24||1.24||-2.54||-2.54||-2.54||-2.54||-2.54||-2.54||-2.54||-2.54||-2.54||-2.54||-2.54||-2.54||-2.54||-2.54||-2.54||-2.54||-2.54||-2.54||-2.54||-2.54||-2.54||-2.54||-2.54||-2.54||-2.54||-2.54||-2.54||-2.54||-2.54||-2.54
789.619	C43H81NO10||C43H81NO10	[M+NH4]+||[M+NH4]+	Termitomycesphin B||Termitomycesphin D	LMSP05010097||LMSP05010098	-1.08||-1.08
790.525	C48H68O8	[M+NH4]+	19-Hexanoyloxyfucoxanthin	LMPR01070056	-0.45
792.551	C43H80NO8P||C43H80NO8P||C43H80NO8P||C43H80NO8P||C43H80NO8P||C43H80NO8P||C43H80NO8P||C43H80NO8P||C43H80NO8P||C43H80NO8P||C43H80NO8P||C43H80NO8P||C43H80NO8P||C43H80NO8P||C43H80NO8P||C43H80NO8P||C43H80NO8P||C43H80NO8P||C43H80NO8P||C43H80NO8P||C43H80NO8P||C43H80NO8P||C43H80NO8P||C43H80NO8P||C45H75O8P||C45H75O8P||C45H75O8P||C45H75O8P||C45H75O8P||C45H75O8P||C45H78NO8P||C45H78NO8P||C45H78NO8P||C45H78NO8…	[M+Na]+||[M+Na]+||[M+Na]+||[M+Na]+||[M+Na]+||[M+Na]+||[M+Na]+||[M+Na]+||[M+Na]+||[M+Na]+||[M+Na]+||[M+Na]+||[M+Na]+||[M+Na]+||[M+Na]+||[M+Na]+||[M+Na]+||[M+Na]+||[M+Na]+||[M+Na]+||[M+Na]+||[M+Na]+||[M+Na]+||[M+Na]+||[M+NH4]+||[M+NH4]+||[M+NH4]+||[M+NH4]+||[M+NH4]+||[M+NH4]+||[M+H]+||[M+H]+||[M+H]+||[M+H]+||[M+H]+||[M+H]+||[M+H]+||[M+H]+||[M+H]+||[M+H]+||[M+H]+||[M+H]+||[M+H]+||[M+H]+||[M+H]+||[M+…	PC(15:0/20:3(8Z,11Z,14Z))||PC(15:1(9Z)/20:2(11Z,14Z))||PC(17:0/18:3(6Z,9Z,12Z))||PC(17:0/18:3(9Z,12Z,15Z))||PC(17:1(9Z)/18:2(9Z,12Z))||PC(17:2(9Z,12Z)/18:1(9Z))||PC(18:1(9Z)/17:2(9Z,12Z))||PC(18:2(9Z,12Z)/17:1(9Z))||PC(18:3(6Z,9Z,12Z)/17:0)||PC(18:3(9Z,12Z,15Z)/17:0)||PC(20:2(11Z,14Z)/15:1(9Z))||PC(20:3(8Z,11Z,14Z)/15:0)||PE(16:1(9Z)/22:2(13Z,16Z))||PE(18:0/20:3(8Z,11Z,14Z))||PE(18:1(9Z)/20:2(11Z…	LMGP01011423||LMGP01011452||LMGP01011506||LMGP01011507||LMGP01011533||LMGP01011562||LMGP01011602||LMGP01011622||LMGP01011648||LMGP01011679||LMGP01011840||LMGP01011870||LMGP02010537||LMGP02011202||LMGP02010647||LMGP02010670||LMGP02010698||LMGP02010726||LMGP02010831||LMGP02010832||LMGP02010854||LMGP02010883||LMGP02010913||LMGP02011078||LMGP10010555||LMGP10010616||LMGP10010674||LMGP10010779||LMGP100…	-0.4||-0.4||-0.4||-0.4||-0.4||-0.4||-0.4||-0.4||-0.4||-0.4||-0.4||-0.4||-0.4||-0.4||-0.4||-0.4||-0.4||-0.4||-0.4||-0.4||-0.4||-0.4||-0.4||-0.4||-3.44||-3.44||-3.44||-3.44||-3.44||-3.44||-3.44||-3.44||-3.44||-3.44||-3.44||-3.44||-3.44||-3.44||-3.44||-3.44||-3.44||-3.44||-3.44||-3.44||-3.44||-3.44||-3.44||-3.44
792.589	C44H84NO7P||C44H84NO7P||C44H84NO7P||C44H84NO7P||C44H84NO7P||C44H84NO7P||C44H84NO7P||C44H84NO7P||C46H82NO7P||C46H82NO7P	[M+Na]+||[M+Na]+||[M+Na]+||[M+Na]+||[M+Na]+||[M+Na]+||[M+Na]+||[M+Na]+||[M+H]+||[M+H]+	PC(O-16:0/20:3(8Z,11Z,14Z))||PC(O-18:0/18:3(6Z,9Z,12Z))||PC(O-18:0/18:3(9Z,12Z,15Z))||PC(O-18:1(11Z)/18:2(9Z,12Z))||PC(O-18:1(9Z)/18:2(9Z,12Z))||PC(P-16:0/20:2(11Z,14Z))||PC(P-18:0/18:2(9Z,12Z))||PC(P-18:1(11Z)/18:1(11Z))||PC(O-16:0/22:6(4Z,7Z,10Z,13Z,16Z,19Z))||PC(P-18:0/20:5(5Z,8Z,11Z,14Z,17Z))	LMGP01020053||LMGP01020204||LMGP01020205||LMGP01020262||LMGP01020264||LMGP01030038||LMGP01030058||LMGP01030137||LMGP01020064||LMGP01030068	1.05||1.05||1.05||1.05||1.05||1.05||1.05||1.05||-1.99||-1.99
793.496	C42H75O10P||C42H75O10P||C42H75O10P||C42H75O10P||C42H75O10P||C42H75O10P||C42H75O10P||C42H75O10P||C42H75O10P||C42H75O10P||C42H75O10P||C42H75O10P||C42H75O10P	[M+Na]+||[M+Na]+||[M+Na]+||[M+Na]+||[M+Na]+||[M+Na]+||[M+Na]+||[M+Na]+||[M+Na]+||[M+Na]+||[M+Na]+||[M+Na]+||[M+Na]+	PG(14:0/22:4(7Z,10Z,13Z,16Z))||PG(16:0/20:4(5Z,8Z,11Z,14Z))||PG(16:1(9Z)/20:3(8Z,11Z,14Z))||PG(18:0/18:4(6Z,9Z,12Z,15Z))||PG(18:1(9Z)/18:3(6Z,9Z,12Z))||PG(18:1(9Z)/18:3(9Z,12Z,15Z))||PG(18:2(9Z,12Z)/18:2(9Z,12Z))||PG(18:3(6Z,9Z,12Z)/18:1(9Z))||PG(18:3(9Z,12Z,15Z)/18:1(9Z))||PG(18:4(6Z,9Z,12Z,15Z)/18:0)||PG(20:3(8Z,11Z,14Z)/16:1(9Z))||PG(20:4(5Z,8Z,11Z,14Z)/16:0)||PG(22:4(7Z,10Z,13Z,16Z)/14:0)	LMGP04010108||LMGP04010036||LMGP04010219||LMGP04010886||LMGP04010330||LMGP04010880||LMGP04010956||LMGP04010378||LMGP04010874||LMGP04010436||LMGP04010596||LMGP04010859||LMGP04010789	-3.28||-3.28||-3.28||-3.28||-3.28||-3.28||-3.28||-3.28||-3.28||-3.28||-3.28||-3.28||-3.28
794.509	C45H74NO7P	[M+Na]+	1-(8-[5]-ladderane-octanoyl)-2-(8-[3]-ladderane-octanyl)-sn-glycerophosphoethanolamine	LMGP02080002	-0.62
794.567	C43H82NO8P||C43H82NO8P||C43H82NO8P||C43H82NO8P||C43H82NO8P||C43H82NO8P||C43H82NO8P||C43H82NO8P||C43H82NO8P||C43H82NO8P||C43H82NO8P||C43H82NO8P||C43H82NO8P||C43H82NO8P||C43H82NO8P||C43H82NO8P||C43H82NO8P||C43H82NO8P||C43H82NO8P||C43H82NO8P||C43H82NO8P||C43H82NO8P||C43H82NO8P||C43H82NO8P||C43H82NO8P||C43H82NO8P||C43H82NO8P||C43H82NO8P||C43H82NO8P||C43H82NO8P||C45H77O8P||C45H77O8P||C45H77O8P||C45H77…	[M+Na]+||[M+Na]+||[M+Na]+||[M+Na]+||[M+Na]+||[M+Na]+||[M+Na]+||[M+Na]+||[M+Na]+||[M+Na]+||[M+Na]+||[M+Na]+||[M+Na]+||[M+Na]+||[M+Na]+||[M+Na]+||[M+Na]+||[M+Na]+||[M+Na]+||[M+Na]+||[M+Na]+||[M+Na]+||[M+Na]+||[M+Na]+||[M+Na]+||[M+Na]+||[M+Na]+||[M+Na]+||[M+Na]+||[M+Na]+||[M+NH4]+||[M+NH4]+||[M+NH4]+||[M+NH4]+||[M+NH4]+||[M+NH4]+||[M+NH4]+||[M+NH4]+||[M+H]+||[M+H]+||[M+H]+||[M+H]+||[M+H]+||[M+H]+||[…	PC(13:0/22:2(13Z,16Z))||PC(15:0/20:2(11Z,14Z))||PC(15:1(9Z)/20:1(11Z))||PC(16:1(9Z)/19:1(9Z))||PC(17:0/18:2(9Z,12Z))||PC(17:1(9Z)/18:1(9Z))||PC(17:2(9Z,12Z)/18:0)||PC(18:0/17:2(9Z,12Z))||PC(18:1(9Z)/17:1(9Z))||PC(18:2(9Z,12Z)/17:0)||PC(19:1(9Z)/16:1(9Z))||PC(20:1(11Z)/15:1(9Z))||PC(20:2(11Z,14Z)/15:0)||PC(22:2(13Z,16Z)/13:0)||PE(16:0/22:2(13Z,16Z))||PE(16:1(9Z)/22:1(11Z))||PE(17:2(9Z,12Z)/21:0)||…	LMGP01011360||LMGP01011422||LMGP01011451||LMGP01011487||LMGP01011505||LMGP01011532||LMGP01011561||LMGP01011587||LMGP01011601||LMGP01011621||LMGP01011763||LMGP01011810||LMGP01011839||LMGP01012036||LMGP02010513||LMGP02010536||LMGP02010615||LMGP02010124||LMGP02010126||LMGP02010669||LMGP02010811||LMGP02010125||LMGP02010853||LMGP02010882||LMGP02010122||LMGP02010998||LMGP02011047||LMGP02011077||LMGP020…	0.24||0.24||0.24||0.24||0.24||0.24||0.24||0.24||0.24||0.24||0.24||0.24||0.24||0.24||0.24||0.24||0.24||0.24||0.24||0.24||0.24||0.24||0.24||0.24||0.24||0.24||0.24||0.24||0.24||0.24||-2.78||-2.78||-2.78||-2.78||-2.78||-2.78||-2.78||-2.78||-2.79||-2.79||-2.79||-2.79||-2.79||-2.79||-2.79||-2.79||-2.79||-2.79||-2.79||-2.79||-2.79||-2.79||-2.79||-2.79||-2.79||-2.79||-2.79||-2.79||-2.79||-2.79||-2.79||-2…
794.605	C46H84NO7P||C46H84NO7P||C46H84NO7P||C46H84NO7P||C46H84NO7P||C46H84NO7P||C46H84NO7P||C44H86NO7P||C44H86NO7P||C44H86NO7P||C44H86NO7P||C44H86NO7P||C44H86NO7P||C44H86NO7P||C44H86NO7P||C44H86NO7P||C44H86NO7P	[M+H]+||[M+H]+||[M+H]+||[M+H]+||[M+H]+||[M+H]+||[M+H]+||[M+Na]+||[M+Na]+||[M+Na]+||[M+Na]+||[M+Na]+||[M+Na]+||[M+Na]+||[M+Na]+||[M+Na]+||[M+Na]+	PC(O-16:0/22:5(7Z,10Z,13Z,16Z,19Z))||PC(O-18:0/20:5(5Z,8Z,11Z,14Z,17Z))||PC(O-18:1(9Z)/20:4(5Z,8Z,11Z,14Z))||PC(O-18:1(9Z)/20:4(8Z,11Z,14Z,17Z))||PC(P-16:0/22:4(7Z,10Z,13Z,16Z))||PC(P-18:0/20:4(5Z,8Z,11Z,14Z))||PC(P-20:0/18:4(6Z,9Z,12Z,15Z))||PC(O-16:0/20:2(11Z,14Z))||PC(O-18:0/18:2(9Z,12Z))||PC(O-18:1(9Z)/18:1(11Z))||PC(P-16:0/20:1(11Z))||PC(P-18:0/18:1(11Z))||PC(P-18:0/18:1(9Z))||PC(P-18:1(11Z)…	LMGP01020066||LMGP01020104||LMGP01020157||LMGP01020267||LMGP01030045||LMGP01030012||LMGP01030090||LMGP01020188||LMGP01020203||LMGP01020263||LMGP01030037||LMGP01030130||LMGP01030013||LMGP01030136||LMGP01030146||LMGP01030081||LMGP02030080	-0.99||-0.99||-0.99||-0.99||-0.99||-0.99||-0.99||2.03||2.03||2.03||2.03||2.03||2.03||2.03||2.03||2.03||2.03
795.513	C42H77O10P||C42H77O10P||C42H77O10P||C42H77O10P||C42H77O10P||C42H77O10P||C42H77O10P||C42H77O10P||C42H77O10P||C42H77O10P||C42H77O10P||C42H77O10P||C42H77O10P||C42H77O10P	[M+Na]+||[M+Na]+||[M+Na]+||[M+Na]+||[M+Na]+||[M+Na]+||[M+Na]+||[M+Na]+||[M+Na]+||[M+Na]+||[M+Na]+||[M+Na]+||[M+Na]+||[M+Na]+	PG(14:1(9Z)/22:2(13Z,16Z))||PG(16:0/20:3(8Z,11Z,14Z))||PG(16:1(9Z)/20:2(11Z,14Z))||PG(17:2(9Z,12Z)/19:1(9Z))||PG(18:0/18:3(6Z,9Z,12Z))||PG(18:0/18:3(9Z,12Z,15Z))||PG(18:1(9Z)/18:2(9Z,12Z))||PG(18:2(9Z,12Z)/18:1(9Z))||PG(18:3(6Z,9Z,12Z)/18:0)||PG(18:3(9Z,12Z,15Z)/18:0)||PG(19:1(9Z)/17:2(9Z,12Z))||PG(20:2(11Z,14Z)/16:1(9Z))||PG(20:3(8Z,11Z,14Z)/16:0)||PG(22:2(13Z,16Z)/14:1(9Z))	LMGP04010136||LMGP04010904||LMGP04010218||LMGP04010295||LMGP04010315||LMGP04010316||LMGP04010960||LMGP04010350||LMGP04010377||LMGP04010407||LMGP04010490||LMGP04010565||LMGP04010595||LMGP04010759	-2.02||-2.02||-2.02||-2.02||-2.02||-2.02||-2.02||-2.02||-2.02||-2.02||-2.02||-2.02||-2.02||-2.02
796.525	C45H76NO7P||C45H76NO7P||C40H77NO12S	[M+Na]+||[M+Na]+||[M+H]+	1-(8-[3]-ladderane-octanoyl)-2-(8-[3]-ladderane-octanyl)-sn-glycerophosphoethanolamine||PE(P-18:1(9Z)/22:6(4Z,7Z,10Z,13Z,16Z,19Z))||(3-sulfo)Galbeta-Cer(d18:1/16:0(2OH))	LMGP02080003||LMGP02030006||LMSP06020003	-0.46||-0.46||1.09
796.584	C45H79O8P||C45H79O8P||C45H79O8P||C45H79O8P||C45H79O8P||C45H79O8P||C45H79O8P||C45H79O8P||C45H82NO8P||C45H82NO8P||C45H82NO8P||C45H82NO8P||C45H82NO8P||C45H82NO8P||C45H82NO8P||C45H82NO8P||C45H82NO8P||C45H82NO8P||C45H82NO8P||C45H82NO8P||C45H82NO8P||C45H82NO8P||C45H82NO8P||C45H82NO8P||C45H82NO8P||C45H82NO8P||C45H82NO8P||C45H82NO8P||C45H82NO8P||C45H82NO8P||C45H82NO8P||C45H82NO8P||C45H82NO8P||C45H82NO8P|…	[M+NH4]+||[M+NH4]+||[M+NH4]+||[M+NH4]+||[M+NH4]+||[M+NH4]+||[M+NH4]+||[M+NH4]+||[M+H]+||[M+H]+||[M+H]+||[M+H]+||[M+H]+||[M+H]+||[M+H]+||[M+H]+||[M+H]+||[M+H]+||[M+H]+||[M+H]+||[M+H]+||[M+H]+||[M+H]+||[M+H]+||[M+H]+||[M+H]+||[M+H]+||[M+H]+||[M+H]+||[M+H]+||[M+H]+||[M+H]+||[M+H]+||[M+H]+||[M+H]+||[M+H]+||[M+H]+||[M+Na]+||[M+Na]+||[M+Na]+||[M+Na]+||[M+Na]+||[M+Na]+||[M+Na]+||[M+Na]+||[M+Na]+||[M+Na]…	PA(20:1(11Z)/22:4(7Z,10Z,13Z,16Z))||PA(20:3(8Z,11Z,14Z)/22:2(13Z,16Z))||PA(20:4(5Z,8Z,11Z,14Z)/22:1(11Z))||PA(20:5(5Z,8Z,11Z,14Z,17Z)/22:0)||PA(22:0/20:5(5Z,8Z,11Z,14Z,17Z))||PA(22:1(11Z)/20:4(5Z,8Z,11Z,14Z))||PA(22:2(13Z,16Z)/20:3(8Z,11Z,14Z))||PA(22:4(7Z,10Z,13Z,16Z)/20:1(11Z))||PC(15:0/22:4(7Z,10Z,13Z,16Z))||PC(17:0/20:4(5Z,8Z,11Z,14Z))||PC(17:1(9Z)/20:3(8Z,11Z,14Z))||PC(17:2(9Z,12Z)/20:2(11Z,…	LMGP10010554||LMGP10010615||LMGP10010643||LMGP10010672||LMGP10010719||LMGP10010747||LMGP10010777||LMGP10010806||LMGP01011429||LMGP01010003||LMGP01011542||LMGP01011571||LMGP01011658||LMGP01011687||LMGP01011717||LMGP01011742||LMGP01011770||LMGP01011771||LMGP01011845||LMGP01011875||LMGP01011904||LMGP01012070||LMGP02011200||LMGP02010677||LMGP02010706||LMGP02010734||LMGP02010764||LMGP02011177||LMGP020…	-1.27||-1.27||-1.27||-1.27||-1.27||-1.27||-1.27||-1.27||-1.27||-1.27||-1.27||-1.27||-1.27||-1.27||-1.27||-1.27||-1.27||-1.27||-1.27||-1.27||-1.27||-1.27||-1.27||-1.27||-1.27||-1.27||-1.27||-1.27||-1.27||-1.27||-1.27||-1.27||-1.27||-1.27||-1.27||-1.27||-1.27||1.75||1.75||1.75||1.75||1.75||1.75||1.75||1.75||1.75||1.75||1.75||1.75||1.75||1.75||1.75||1.75||1.75||1.75||1.75||1.75||1.75||1.75||1.75||1.…
797.528	C42H79O10P||C42H79O10P||C42H79O10P||C42H79O10P||C42H79O10P||C42H79O10P||C42H79O10P||C42H79O10P||C42H79O10P||C42H79O10P||C42H79O10P||C42H79O10P||C42H79O10P||C42H79O10P||C42H79O10P||C42H79O10P||C42H79O10P	[M+Na]+||[M+Na]+||[M+Na]+||[M+Na]+||[M+Na]+||[M+Na]+||[M+Na]+||[M+Na]+||[M+Na]+||[M+Na]+||[M+Na]+||[M+Na]+||[M+Na]+||[M+Na]+||[M+Na]+||[M+Na]+||[M+Na]+	LBPA(18:1(9Z)/18:1(9Z))||PG(14:0/22:2(13Z,16Z))||PG(14:1(9Z)/22:1(11Z))||PG(16:0/20:2(11Z,14Z))||PG(16:1(9Z)/20:1(11Z))||PG(17:1(9Z)/19:1(9Z))||PG(17:2(9Z,12Z)/19:0)||PG(18:0/18:2(9Z,12Z))||PG(18:1(9E)/18:1(9E))||PG(18:1(9Z)/18:1(9Z))||PG(18:2(9Z,12Z)/18:0)||PG(19:0/17:2(9Z,12Z))||PG(19:1(9Z)/17:1(9Z))||PG(20:1(11Z)/16:1(9Z))||PG(20:2(11Z,14Z)/16:0)||PG(22:1(11Z)/14:1(9Z))||PG(22:2(13Z,16Z)/14:0)	LMGP04100003||LMGP04010107||LMGP04010135||LMGP04010197||LMGP04010217||LMGP04010265||LMGP04010294||LMGP04010982||LMGP04010033||LMGP04010985||LMGP04010876||LMGP04010461||LMGP04010489||LMGP04010535||LMGP04010564||LMGP04010728||LMGP04010758	-2.69||-2.69||-2.69||-2.69||-2.69||-2.69||-2.69||-2.69||-2.69||-2.69||-2.69||-2.69||-2.69||-2.69||-2.69||-2.69||-2.69
798.522	C41H78NO10P||C41H78NO10P||C41H78NO10P||C41H78NO10P||C41H78NO10P||C41H78NO10P||C41H78NO10P||C41H78NO10P||C41H78NO10P||C41H78NO10P||C41H78NO10P||C41H78NO10P||C41H78NO10P||C41H78NO10P||C41H78NO10P||C41H78NO10P	[M+Na]+||[M+Na]+||[M+Na]+||[M+Na]+||[M+Na]+||[M+Na]+||[M+Na]+||[M+Na]+||[M+Na]+||[M+Na]+||[M+Na]+||[M+Na]+||[M+Na]+||[M+Na]+||[M+Na]+||[M+Na]+	PS(13:0/22:1(11Z))||PS(14:1(9Z)/21:0)||PS(15:0/20:1(11Z))||PS(15:1(9Z)/20:0)||PS(16:0/19:1(9Z))||PS(16:1(9Z)/19:0)||PS(17:0/18:1(9Z))||PS(17:1(9Z)/18:0)||PS(18:0/17:1(9Z))||PS(18:1(9Z)/17:0)||PS(19:0/16:1(9Z))||PS(19:1(9Z)/16:0)||PS(20:0/15:1(9Z))||PS(20:1(11Z)/15:0)||PS(21:0/14:1(9Z))||PS(22:1(11Z)/13:0)	LMGP03010089||LMGP03010133||LMGP03010151||LMGP03010180||LMGP03010196||LMGP03010214||LMGP03010893||LMGP03010258||LMGP03010313||LMGP03010327||LMGP03010458||LMGP03010486||LMGP03010513||LMGP03010532||LMGP03010677||LMGP03010726	-3.85||-3.85||-3.85||-3.85||-3.85||-3.85||-3.85||-3.85||-3.85||-3.85||-3.85||-3.85||-3.85||-3.85||-3.85||-3.85
798.531	C43H76NO10P||C43H76NO10P||C43H76NO10P||C43H76NO10P||C43H76NO10P||C43H76NO10P||C43H76NO10P||C43H76NO10P||C43H76NO10P||C43H76NO10P||C43H76NO10P||C43H76NO10P||C43H76NO10P||C43H76NO10P||C43H73O10P||C43H73O10P||C43H73O10P||C43H73O10P||C43H73O10P||C43H73O10P	[M+H]+||[M+H]+||[M+H]+||[M+H]+||[M+H]+||[M+H]+||[M+H]+||[M+H]+||[M+H]+||[M+H]+||[M+H]+||[M+H]+||[M+H]+||[M+H]+||[M+NH4]+||[M+NH4]+||[M+NH4]+||[M+NH4]+||[M+NH4]+||[M+NH4]+	PS(15:0/22:4(7Z,10Z,13Z,16Z))||PS(17:0/20:4(5Z,8Z,11Z,14Z))||PS(17:1(9Z)/20:3(8Z,11Z,14Z))||PS(17:2(9Z,12Z)/20:2(11Z,14Z))||PS(18:3(6Z,9Z,12Z)/19:1(9Z))||PS(18:3(9Z,12Z,15Z)/19:1(9Z))||PS(18:4(6Z,9Z,12Z,15Z)/19:0)||PS(19:0/18:4(6Z,9Z,12Z,15Z))||PS(19:1(9Z)/18:3(6Z,9Z,12Z))||PS(19:1(9Z)/18:3(9Z,12Z,15Z))||PS(20:2(11Z,14Z)/17:2(9Z,12Z))||PS(20:3(8Z,11Z,14Z)/17:1(9Z))||PS(20:4(5Z,8Z,11Z,14Z)/17:0)||…	LMGP03010159||LMGP03010003||LMGP03010269||LMGP03010298||LMGP03010384||LMGP03010412||LMGP03010442||LMGP03010466||LMGP03010494||LMGP03010495||LMGP03010568||LMGP03010598||LMGP03010627||LMGP03010791||LMGP04010160||LMGP04010271||LMGP04010300||LMGP04010629||LMGP04010657||LMGP04010821	4.1||4.1||4.1||4.1||4.1||4.1||4.1||4.1||4.1||4.1||4.1||4.1||4.1||4.1||4.11||4.11||4.11||4.11||4.11||4.11
798.54	C45H78NO7P||C40H76O12S	[M+Na]+||[M+NH4]+	PE(P-18:0/22:6(4Z,7Z,10Z,13Z,16Z,19Z))||SQDG(16:0/14:0)	LMGP02030005||LMGL05010005	-0.62||0.94
798.6	C45H81O8P||C45H81O8P||C45H81O8P||C45H81O8P||C45H81O8P||C45H81O8P||C45H81O8P||C45H81O8P||C45H84NO8P||C45H84NO8P||C45H84NO8P||C45H84NO8P||C45H84NO8P||C45H84NO8P||C45H84NO8P||C45H84NO8P||C45H84NO8P||C45H84NO8P||C45H84NO8P||C45H84NO8P||C45H84NO8P||C45H84NO8P||C45H84NO8P||C45H84NO8P||C45H84NO8P||C45H84NO8P||C45H84NO8P||C45H84NO8P||C45H84NO8P||C45H84NO8P||C45H84NO8P||C45H84NO8P||C45H84NO8P||C45H84NO8P|…	[M+NH4]+||[M+NH4]+||[M+NH4]+||[M+NH4]+||[M+NH4]+||[M+NH4]+||[M+NH4]+||[M+NH4]+||[M+H]+||[M+H]+||[M+H]+||[M+H]+||[M+H]+||[M+H]+||[M+H]+||[M+H]+||[M+H]+||[M+H]+||[M+H]+||[M+H]+||[M+H]+||[M+H]+||[M+H]+||[M+H]+||[M+H]+||[M+H]+||[M+H]+||[M+H]+||[M+H]+||[M+H]+||[M+H]+||[M+H]+||[M+H]+||[M+H]+||[M+Na]+||[M+Na]+||[M+Na]+||[M+Na]+||[M+Na]+||[M+Na]+||[M+Na]+||[M+Na]+||[M+Na]+||[M+Na]+||[M+Na]+||[M+Na]+||[M+…	PA(20:0/22:4(7Z,10Z,13Z,16Z))||PA(20:2(11Z,14Z)/22:2(13Z,16Z))||PA(20:3(8Z,11Z,14Z)/22:1(11Z))||PA(20:4(5Z,8Z,11Z,14Z)/22:0)||PA(22:0/20:4(5Z,8Z,11Z,14Z))||PA(22:1(11Z)/20:3(8Z,11Z,14Z))||PA(22:2(13Z,16Z)/20:2(11Z,14Z))||PA(22:4(7Z,10Z,13Z,16Z)/20:0)||PC(15:1(9Z)/22:2(13Z,16Z))||PC(17:0/20:3(8Z,11Z,14Z))||PC(17:1(9Z)/20:2(11Z,14Z))||PC(17:2(9Z,12Z)/20:1(11Z))||PC(18:2(9Z,12Z)/19:1(9Z))||PC(18:3(6…	LMGP10010525||LMGP10010584||LMGP10010614||LMGP10010642||LMGP10010718||LMGP10010746||LMGP10010776||LMGP10010805||LMGP01011459||LMGP01011514||LMGP01011541||LMGP01011570||LMGP01011629||LMGP01011657||LMGP01011686||LMGP01011740||LMGP01011741||LMGP01011769||LMGP01011815||LMGP01011844||LMGP01011874||LMGP01012040||LMGP02010651||LMGP02010676||LMGP02010705||LMGP02010733||LMGP02010835||LMGP02010861||LMGP020…	-0.29||-0.29||-0.29||-0.29||-0.29||-0.29||-0.29||-0.29||-0.3||-0.3||-0.3||-0.3||-0.3||-0.3||-0.3||-0.3||-0.3||-0.3||-0.3||-0.3||-0.3||-0.3||-0.3||-0.3||-0.3||-0.3||-0.3||-0.3||-0.3||-0.3||-0.3||-0.3||-0.3||-0.3||2.72||2.72||2.72||2.72||2.72||2.72||2.72||2.72||2.72||2.72||2.72||2.72||2.72||2.72||2.72||2.72||2.72||2.72||2.72||2.72||2.72||-3.26
799.526	C45H77O8P||C45H77O8P||C45H77O8P||C45H77O8P||C45H77O8P||C45H77O8P||C45H77O8P||C45H77O8P||C42H72NO10P||C42H72NO10P||C42H72NO10P||C42H72NO10P||C42H72NO10P||C42H72NO10P||C42H72NO10P||C42H72NO10P||C42H72NO10P||C42H72NO10P||C42H72NO10P||C42H72NO10P	[M+Na]+||[M+Na]+||[M+Na]+||[M+Na]+||[M+Na]+||[M+Na]+||[M+Na]+||[M+Na]+||[M+NH4]+||[M+NH4]+||[M+NH4]+||[M+NH4]+||[M+NH4]+||[M+NH4]+||[M+NH4]+||[M+NH4]+||[M+NH4]+||[M+NH4]+||[M+NH4]+||[M+NH4]+	PA(20:0/22:6(4Z,7Z,10Z,13Z,16Z,19Z))||PA(20:2(11Z,14Z)/22:4(7Z,10Z,13Z,16Z))||PA(20:4(5Z,8Z,11Z,14Z)/22:2(13Z,16Z))||PA(20:5(5Z,8Z,11Z,14Z,17Z)/22:1(11Z))||PA(22:1(11Z)/20:5(5Z,8Z,11Z,14Z,17Z))||PA(22:2(13Z,16Z)/20:4(5Z,8Z,11Z,14Z))||PA(22:4(7Z,10Z,13Z,16Z)/20:2(11Z,14Z))||PA(22:6(4Z,7Z,10Z,13Z,16Z,19Z)/20:0)||PS(14:1(9Z)/22:4(7Z,10Z,13Z,16Z))||PS(16:0/20:5(5Z,8Z,11Z,14Z,17Z))||PS(16:1(9Z)/20:4(5…	LMGP10010860||LMGP10010585||LMGP10010644||LMGP10010673||LMGP10010748||LMGP10010778||LMGP10010807||LMGP10010834||LMGP03010137||LMGP03010902||LMGP03010898||LMGP03010331||LMGP03010351||LMGP03010352||LMGP03010379||LMGP03010408||LMGP03010437||LMGP03010626||LMGP03010654||LMGP03010790	1.82||1.82||1.82||1.82||1.82||1.82||1.82||1.82||3.84||3.84||3.84||3.84||3.84||3.84||3.84||3.84||3.84||3.84||3.84||3.84
799.544	C42H81O10P||C42H81O10P||C42H81O10P||C42H81O10P||C42H81O10P||C42H81O10P||C42H81O10P||C42H81O10P||C42H81O10P||C42H81O10P||C42H81O10P||C42H81O10P||C42H81O10P||C42H81O10P||C42H81O10P||C42H81O10P	[M+Na]+||[M+Na]+||[M+Na]+||[M+Na]+||[M+Na]+||[M+Na]+||[M+Na]+||[M+Na]+||[M+Na]+||[M+Na]+||[M+Na]+||[M+Na]+||[M+Na]+||[M+Na]+||[M+Na]+||[M+Na]+	PG(14:0/22:1(11Z))||PG(14:1(9Z)/22:0)||PG(15:1(9Z)/21:0)||PG(16:0/20:1(11Z))||PG(16:1(9Z)/20:0)||PG(17:0/19:1(9Z))||PG(17:1(9Z)/19:0)||PG(18:0/18:1(9Z))||PG(18:1(9Z)/18:0)||PG(19:0/17:1(9Z))||PG(19:1(9Z)/17:0)||PG(20:0/16:1(9Z))||PG(20:1(11Z)/16:0)||PG(21:0/15:1(9Z))||PG(22:0/14:1(9Z))||PG(22:1(11Z)/14:0)	LMGP04010106||LMGP04010134||LMGP04010186||LMGP04010970||LMGP04010216||LMGP04010238||LMGP04010264||LMGP04010037||LMGP04010961||LMGP04010460||LMGP04010488||LMGP04010514||LMGP04010534||LMGP04010679||LMGP04010702||LMGP04010727	-2.79||-2.79||-2.79||-2.79||-2.79||-2.79||-2.79||-2.79||-2.79||-2.79||-2.79||-2.79||-2.79||-2.79||-2.79||-2.79
799.668	C46H91N2O6P||C46H91N2O6P	[M+H]+||[M+H]+	SM(d17:1/24:1)||SM(d18:2/23:0)	LMSP03010074||LMSP03010075	-0.85||-0.85
800.46	C37H67O15P	[M+NH4]+	PHODA-PI	LMGP20050001	4.91
800.538	C41H80NO10P||C41H80NO10P||C41H80NO10P||C41H80NO10P||C41H80NO10P||C41H80NO10P||C41H80NO10P||C41H80NO10P||C41H80NO10P||C41H80NO10P	[M+Na]+||[M+Na]+||[M+Na]+||[M+Na]+||[M+Na]+||[M+Na]+||[M+Na]+||[M+Na]+||[M+Na]+||[M+Na]+	PS(13:0/22:0)||PS(14:0/21:0)||PS(15:0/20:0)||PS(16:0/19:0)||PS(17:0/18:0)||PS(18:0/17:0)||PS(19:0/16:0)||PS(20:0/15:0)||PS(21:0/14:0)||PS(22:0/13:0)	LMGP03010088||LMGP03010105||LMGP03010150||LMGP03010968||LMGP03010894||LMGP03010312||LMGP03010953||LMGP03010512||LMGP03010853||LMGP03010849	-3.99||-3.99||-3.99||-3.99||-3.99||-3.99||-3.99||-3.99||-3.99||-3.99
800.547	C43H78NO10P||C43H78NO10P||C43H78NO10P||C43H78NO10P||C43H78NO10P||C43H78NO10P||C43H78NO10P||C43H78NO10P||C43H78NO10P||C43H78NO10P||C43H78NO10P||C43H78NO10P||C43H78NO10P||C43H78NO10P||C43H75O10P||C43H75O10P||C43H75O10P||C43H75O10P||C43H75O10P||C43H75O10P||C43H75O10P||C43H75O10P||C43H75O10P||C43H75O10P	[M+H]+||[M+H]+||[M+H]+||[M+H]+||[M+H]+||[M+H]+||[M+H]+||[M+H]+||[M+H]+||[M+H]+||[M+H]+||[M+H]+||[M+H]+||[M+H]+||[M+NH4]+||[M+NH4]+||[M+NH4]+||[M+NH4]+||[M+NH4]+||[M+NH4]+||[M+NH4]+||[M+NH4]+||[M+NH4]+||[M+NH4]+	PS(15:1(9Z)/22:2(13Z,16Z))||PS(17:0/20:3(8Z,11Z,14Z))||PS(17:1(9Z)/20:2(11Z,14Z))||PS(17:2(9Z,12Z)/20:1(11Z))||PS(18:2(9Z,12Z)/19:1(9Z))||PS(18:3(6Z,9Z,12Z)/19:0)||PS(18:3(9Z,12Z,15Z)/19:0)||PS(19:0/18:3(6Z,9Z,12Z))||PS(19:0/18:3(9Z,12Z,15Z))||PS(19:1(9Z)/18:2(9Z,12Z))||PS(20:1(11Z)/17:2(9Z,12Z))||PS(20:2(11Z,14Z)/17:1(9Z))||PS(20:3(8Z,11Z,14Z)/17:0)||PS(22:2(13Z,16Z)/15:1(9Z))||PG(15:1(9Z)/22:4(…	LMGP03010189||LMGP03010241||LMGP03010268||LMGP03010297||LMGP03010355||LMGP03010383||LMGP03010411||LMGP03010464||LMGP03010465||LMGP03010493||LMGP03010538||LMGP03010567||LMGP03010597||LMGP03010761||LMGP04010190||LMGP04010242||LMGP04010270||LMGP04010299||LMGP04010443||LMGP04010496||LMGP04010599||LMGP04010628||LMGP04010656||LMGP04010792	3.86||3.86||3.86||3.86||3.86||3.86||3.86||3.86||3.86||3.86||3.86||3.86||3.86||3.86||3.86||3.86||3.86||3.86||3.86||3.86||3.86||3.86||3.86||3.86
800.616	C45H83O8P||C45H83O8P||C45H83O8P||C45H83O8P||C45H83O8P||C45H83O8P||C45H86NO8P||C45H86NO8P||C45H86NO8P||C45H86NO8P||C45H86NO8P||C45H86NO8P||C45H86NO8P||C45H86NO8P||C45H86NO8P||C45H86NO8P||C45H86NO8P||C45H86NO8P||C45H86NO8P||C45H86NO8P||C45H86NO8P||C45H86NO8P||C45H86NO8P||C45H86NO8P||C45H86NO8P||C45H86NO8P||C45H86NO8P||C45H86NO8P||C45H86NO8P	[M+NH4]+||[M+NH4]+||[M+NH4]+||[M+NH4]+||[M+NH4]+||[M+NH4]+||[M+H]+||[M+H]+||[M+H]+||[M+H]+||[M+H]+||[M+H]+||[M+H]+||[M+H]+||[M+H]+||[M+H]+||[M+H]+||[M+H]+||[M+H]+||[M+H]+||[M+H]+||[M+H]+||[M+H]+||[M+H]+||[M+H]+||[M+H]+||[M+H]+||[M+H]+||[M+H]+	PA(20:1(11Z)/22:2(13Z,16Z))||PA(20:2(11Z,14Z)/22:1(11Z))||PA(20:3(8Z,11Z,14Z)/22:0)||PA(22:0/20:3(8Z,11Z,14Z))||PA(22:1(11Z)/20:2(11Z,14Z))||PA(22:2(13Z,16Z)/20:1(11Z))||PC(15:0/22:2(13Z,16Z))||PC(15:1(9Z)/22:1(11Z))||PC(17:0/20:2(11Z,14Z))||PC(17:1(9Z)/20:1(11Z))||PC(17:2(9Z,12Z)/20:0)||PC(18:1(9Z)/19:1(9Z))||PC(18:2(9Z,12Z)/19:0)||PC(19:0/18:2(9Z,12Z))||PC(19:1(9Z)/18:1(9Z))||PC(20:0/17:2(9Z,12…	LMGP10010553||LMGP10010583||LMGP10010613||LMGP10010717||LMGP10010745||LMGP10010775||LMGP01011428||LMGP01011458||LMGP01011513||LMGP01011540||LMGP01011569||LMGP01011606||LMGP01011628||LMGP01011739||LMGP01011768||LMGP01011793||LMGP01011814||LMGP01011843||LMGP01012009||LMGP01012039||LMGP02010634||LMGP02010650||LMGP02010675||LMGP02010140||LMGP02011175||LMGP02010890||LMGP02011024||LMGP02011052||LMGP020…	-0.69||-0.69||-0.69||-0.69||-0.69||-0.69||-0.69||-0.69||-0.69||-0.69||-0.69||-0.69||-0.69||-0.69||-0.69||-0.69||-0.69||-0.69||-0.69||-0.69||-0.69||-0.69||-0.69||-0.69||-0.69||-0.69||-0.69||-0.69||-0.69
801.541	C45H79O8P||C45H79O8P||C45H79O8P||C45H79O8P||C45H79O8P||C45H79O8P||C45H79O8P||C45H79O8P||C47H77O8P||C47H77O8P||C47H77O8P||C42H74NO10P||C42H74NO10P||C42H74NO10P||C42H74NO10P||C42H74NO10P||C42H74NO10P||C42H74NO10P||C42H74NO10P||C42H74NO10P||C42H74NO10P||C42H74NO10P||C42H74NO10P||C42H74NO10P	[M+Na]+||[M+Na]+||[M+Na]+||[M+Na]+||[M+Na]+||[M+Na]+||[M+Na]+||[M+Na]+||[M+H]+||[M+H]+||[M+H]+||[M+NH4]+||[M+NH4]+||[M+NH4]+||[M+NH4]+||[M+NH4]+||[M+NH4]+||[M+NH4]+||[M+NH4]+||[M+NH4]+||[M+NH4]+||[M+NH4]+||[M+NH4]+||[M+NH4]+	PA(20:1(11Z)/22:4(7Z,10Z,13Z,16Z))||PA(20:3(8Z,11Z,14Z)/22:2(13Z,16Z))||PA(20:4(5Z,8Z,11Z,14Z)/22:1(11Z))||PA(20:5(5Z,8Z,11Z,14Z,17Z)/22:0)||PA(22:0/20:5(5Z,8Z,11Z,14Z,17Z))||PA(22:1(11Z)/20:4(5Z,8Z,11Z,14Z))||PA(22:2(13Z,16Z)/20:3(8Z,11Z,14Z))||PA(22:4(7Z,10Z,13Z,16Z)/20:1(11Z))||PA(22:2(13Z,16Z)/22:6(4Z,7Z,10Z,13Z,16Z,19Z))||PA(22:4(7Z,10Z,13Z,16Z)/22:4(7Z,10Z,13Z,16Z))||PA(22:6(4Z,7Z,10Z,13Z,1…	LMGP10010554||LMGP10010615||LMGP10010643||LMGP10010672||LMGP10010719||LMGP10010747||LMGP10010777||LMGP10010806||LMGP10010785||LMGP10010815||LMGP10010843||LMGP03010108||LMGP03010038||LMGP03010219||LMGP03010886||LMGP03010330||LMGP03010880||LMGP03010023||LMGP03010378||LMGP03010874||LMGP03010436||LMGP03010596||LMGP03010859||LMGP03010789	1.02||1.02||1.02||1.02||1.02||1.02||1.02||1.02||-1.97||-1.97||-1.97||3.05||3.05||3.05||3.05||3.05||3.05||3.05||3.05||3.05||3.05||3.05||3.05||3.05
801.684	C46H93N2O6P||C46H93N2O6P||C46H93N2O6P	[M+H]+||[M+H]+||[M+H]+	SM(d16:1/25:0)||SM(d17:1/24:0)||SM(d18:1/23:0)	LMSP03010076||LMSP03010077||LMSP03010078	-0.54||-0.54||-0.54
803.697	C46H95N2O6P||C46H95N2O6P	[M+H]+||[M+H]+	SM(d16:0/25:0)||SM(d18:0/23:0)	LMSP03010097||LMSP03010096	-3.73||-3.73
805.496	C43H75O10P||C43H75O10P||C43H75O10P||C43H75O10P||C43H75O10P||C43H75O10P||C43H75O10P||C43H75O10P||C43H75O10P||C43H75O10P	[M+Na]+||[M+Na]+||[M+Na]+||[M+Na]+||[M+Na]+||[M+Na]+||[M+Na]+||[M+Na]+||[M+Na]+||[M+Na]+	PG(15:1(9Z)/22:4(7Z,10Z,13Z,16Z))||PG(17:0/20:5(5Z,8Z,11Z,14Z,17Z))||PG(17:1(9Z)/20:4(5Z,8Z,11Z,14Z))||PG(17:2(9Z,12Z)/20:3(8Z,11Z,14Z))||PG(18:4(6Z,9Z,12Z,15Z)/19:1(9Z))||PG(19:1(9Z)/18:4(6Z,9Z,12Z,15Z))||PG(20:3(8Z,11Z,14Z)/17:2(9Z,12Z))||PG(20:4(5Z,8Z,11Z,14Z)/17:1(9Z))||PG(20:5(5Z,8Z,11Z,14Z,17Z)/17:0)||PG(22:4(7Z,10Z,13Z,16Z)/15:1(9Z))	LMGP04010190||LMGP04010242||LMGP04010270||LMGP04010299||LMGP04010443||LMGP04010496||LMGP04010599||LMGP04010628||LMGP04010656||LMGP04010792	-4.19||-4.19||-4.19||-4.19||-4.19||-4.19||-4.19||-4.19||-4.19||-4.19
806.567	C44H82NO8P||C44H82NO8P||C44H82NO8P||C44H82NO8P||C44H82NO8P||C44H82NO8P||C44H82NO8P||C44H82NO8P||C44H82NO8P||C44H82NO8P||C44H82NO8P||C44H82NO8P||C44H82NO8P||C44H82NO8P||C44H82NO8P||C44H82NO8P||C44H82NO8P||C44H82NO8P||C44H82NO8P||C44H82NO8P||C44H82NO8P||C44H82NO8P||C44H82NO8P||C44H82NO8P||C44H82NO8P||C44H82NO8P||C44H82NO8P||C44H82NO8P||C44H82NO8P||C44H82NO8P||C44H82NO8P||C44H82NO8P||C46H77O8P||C46H…	[M+Na]+||[M+Na]+||[M+Na]+||[M+Na]+||[M+Na]+||[M+Na]+||[M+Na]+||[M+Na]+||[M+Na]+||[M+Na]+||[M+Na]+||[M+Na]+||[M+Na]+||[M+Na]+||[M+Na]+||[M+Na]+||[M+Na]+||[M+Na]+||[M+Na]+||[M+Na]+||[M+Na]+||[M+Na]+||[M+Na]+||[M+Na]+||[M+Na]+||[M+Na]+||[M+Na]+||[M+Na]+||[M+Na]+||[M+Na]+||[M+Na]+||[M+Na]+||[M+NH4]+||[M+H]+||[M+H]+||[M+H]+||[M+H]+||[M+H]+||[M+H]+||[M+H]+||[M+H]+||[M+H]+||[M+H]+||[M+H]+||[M+H]+||[M+H]…	PC(14:1(9Z)/22:2(13Z,16Z))||PC(16:0/20:3(5Z,8Z,11Z))||PC(16:0/20:3(8E,11E,14E))||PC(16:0/20:3(8Z,11Z,14Z))||PC(16:1(9Z)/20:2(11Z,14Z))||PC(17:2(9Z,12Z)/19:1(9Z))||PC(18:0/18:3(6Z,9Z,12Z))||PC(18:0/18:3(9Z,12Z,15Z))||PC(18:1(11Z)/18:2(9Z,12Z))||PC(18:1(9Z)/18:2(6Z,9Z))||PC(18:1(9Z)/18:2(9Z,12Z))||PC(18:2(9Z,12Z)/18:1(11Z))||PC(18:2(9Z,12Z)/18:1(9Z))||PC(18:3(6Z,9Z,12Z)/18:0)||PC(18:3(9Z,12Z,15Z)/1…	LMGP01011406||LMGP01010622||LMGP01010624||LMGP01010627||LMGP01011490||LMGP01011568||LMGP01011588||LMGP01011589||LMGP01012149||LMGP01010893||LMGP01010895||LMGP01012168||LMGP01011624||LMGP01011651||LMGP01011682||LMGP01011766||LMGP01011842||LMGP01012194||LMGP01011872||LMGP01012038||LMGP02010588||LMGP02010617||LMGP02010704||LMGP02010732||LMGP02010784||LMGP02010814||LMGP02010889||LMGP02010919||LMGP020…	-0.15||-0.15||-0.15||-0.15||-0.15||-0.15||-0.15||-0.15||-0.15||-0.15||-0.15||-0.15||-0.15||-0.15||-0.15||-0.15||-0.15||-0.15||-0.15||-0.15||-0.15||-0.15||-0.15||-0.15||-0.15||-0.15||-0.15||-0.15||-0.15||-0.15||-0.15||-0.15||-3.13||-3.13||-3.13||-3.13||-3.13||-3.13||-3.13||-3.13||-3.13||-3.13||-3.13||-3.13||-3.13||-3.13||-3.13||-3.13||-3.13||-3.13||-3.13||-3.13||-3.13||-3.13||-3.13||-3.13||-3.13||…
806.71	C45H93N2O6P||C45H93N2O6P	[M+NH4]+||[M+NH4]+	SM(d16:0/24:0)||SM(d18:0/22:0)	LMSP03010100||LMSP03010022	-1.37||-1.37
806.828	C53H104O3	[M+NH4]+	2-eicosyl-3-hydroxy-tritriaconta-16Z-enoic acid	LMFA01160026	-4.9
807.635	C45H89N2O6P||C45H89N2O6P||C45H89N2O6P	[M+Na]+||[M+Na]+||[M+Na]+	SM(d16:1/24:1)||SM(d18:1/22:1)||SM(d18:2/22:0)	LMSP03010071||LMSP03010072||LMSP03010092	-0.51||-0.51||-0.51
808.573	C42H82NO11P	[M+H]+	PI-Cer(d20:1/16:0)	LMSP03030154	4.45
808.583	C44H84NO8P||C44H84NO8P||C44H84NO8P||C44H84NO8P||C44H84NO8P||C44H84NO8P||C44H84NO8P||C44H84NO8P||C44H84NO8P||C44H84NO8P||C44H84NO8P||C44H84NO8P||C44H84NO8P||C44H84NO8P||C44H84NO8P||C44H84NO8P||C44H84NO8P||C44H84NO8P||C44H84NO8P||C44H84NO8P||C44H84NO8P||C44H84NO8P||C44H84NO8P||C44H84NO8P||C44H84NO8P||C44H84NO8P||C44H84NO8P||C44H84NO8P||C44H84NO8P||C44H84NO8P||C44H84NO8P||C44H84NO8P||C44H84NO8P||C44…	[M+Na]+||[M+Na]+||[M+Na]+||[M+Na]+||[M+Na]+||[M+Na]+||[M+Na]+||[M+Na]+||[M+Na]+||[M+Na]+||[M+Na]+||[M+Na]+||[M+Na]+||[M+Na]+||[M+Na]+||[M+Na]+||[M+Na]+||[M+Na]+||[M+Na]+||[M+Na]+||[M+Na]+||[M+Na]+||[M+Na]+||[M+Na]+||[M+Na]+||[M+Na]+||[M+Na]+||[M+Na]+||[M+Na]+||[M+Na]+||[M+Na]+||[M+Na]+||[M+Na]+||[M+Na]+||[M+Na]+||[M+Na]+||[M+Na]+||[M+Na]+||[M+Na]+||[M+Na]+||[M+Na]+||[M+Na]+||[M+Na]+||[M+Na]+||[M+…	PC(14:0/22:2(13Z,16Z))||PC(14:1(9Z)/22:1(11Z))||PC(14:1(9Z)/22:1(13Z))||PC(16:0/20:2(11Z,14Z))||PC(16:1(9Z)/20:1(11Z))||PC(17:1(9Z)/19:1(9Z))||PC(17:2(9Z,12Z)/19:0)||PC(18:0/18:2(10Z,12Z))||PC(18:0/18:2(2E,4E))||PC(18:0/18:2(6Z,9Z))||PC(18:0/18:2(9Z,12Z))||PC(18:1(10Z)/18:1(10Z))||PC(18:1(11E)/18:1(11E))||PC(18:1(11Z)/18:1(11Z))||PC(18:1(11Z)/18:1(9Z))||PC(18:1(12Z)/18:1(12Z))||PC(18:1(13Z)/18:1(…	LMGP01011377||LMGP01011405||LMGP01012133||LMGP01011469||LMGP01011489||LMGP01011538||LMGP01011567||LMGP01010764||LMGP01010765||LMGP01010766||LMGP01010768||LMGP01010836||LMGP01010837||LMGP01010841||LMGP01012148||LMGP01010849||LMGP01010851||LMGP01010853||LMGP01010855||LMGP01010857||LMGP01010858||LMGP01010860||LMGP01010862||LMGP01010966||LMGP01010865||LMGP01010866||LMGP01010868||LMGP01010871||LMGP010…	0.32||0.32||0.32||0.32||0.32||0.32||0.32||0.32||0.32||0.32||0.32||0.32||0.32||0.32||0.32||0.32||0.32||0.32||0.32||0.32||0.32||0.32||0.32||0.32||0.32||0.32||0.32||0.32||0.32||0.32||0.32||0.32||0.32||0.32||0.32||0.32||0.32||0.32||0.32||0.32||0.32||0.32||0.32||0.32||0.32||0.32||0.32||0.32||0.32||0.32||0.32||0.32||-2.65||-2.65||-2.65||-2.66||-2.66||-2.66||-2.66||-2.66||-2.66||-2.66||-2.66||-2.66||-2.…
809.651	C45H91N2O6P||C45H91N2O6P	[M+Na]+||[M+Na]+	SM(d16:1/24:0)||SM(d18:1/22:0)	LMSP03010073||LMSP03010006	0.57||0.57
810.502	C45H74NO8P||C45H74NO8P||C45H74NO8P||C45H74NO8P||C45H74NO8P||C45H74NO8P||C45H74NO8P	[M+Na]+||[M+Na]+||[M+Na]+||[M+Na]+||[M+Na]+||[M+Na]+||[M+Na]+	PE(18:2(9Z,12Z)/22:6(4Z,7Z,10Z,13Z,16Z,19Z))||PE(18:4(6Z,9Z,12Z,15Z)/22:4(7Z,10Z,13Z,16Z))||PE(20:3(8Z,11Z,14Z)/20:5(5Z,8Z,11Z,14Z,17Z))||PE(20:4(5Z,8Z,11Z,14Z)/20:4(5Z,8Z,11Z,14Z))||PE(20:5(5Z,8Z,11Z,14Z,17Z)/20:3(8Z,11Z,14Z))||PE(22:4(7Z,10Z,13Z,16Z)/18:4(6Z,9Z,12Z,15Z))||PE(22:6(4Z,7Z,10Z,13Z,16Z,19Z)/18:2(9Z,12Z))	LMGP02011191||LMGP02010767||LMGP02010926||LMGP02011173||LMGP02010983||LMGP02011118||LMGP02011144	-3.44||-3.44||-3.44||-3.44||-3.44||-3.44||-3.44
810.525	C42H78NO10P||C42H78NO10P||C42H78NO10P||C42H78NO10P||C42H78NO10P||C42H78NO10P||C42H78NO10P||C42H78NO10P||C42H78NO10P||C42H78NO10P||C42H78NO10P||C42H78NO10P||C42H78NO10P||C42H78NO10P||C42H78NO10P||C44H73O10P||C44H73O10P||C44H73O10P||C44H73O10P||C44H73O10P||C44H73O10P||C44H73O10P||C44H73O10P||C44H73O10P||C44H73O10P||C44H76NO10P||C44H76NO10P||C44H76NO10P||C44H76NO10P||C44H76NO10P||C44H76NO10P||C44H76…	[M+Na]+||[M+Na]+||[M+Na]+||[M+Na]+||[M+Na]+||[M+Na]+||[M+Na]+||[M+Na]+||[M+Na]+||[M+Na]+||[M+Na]+||[M+Na]+||[M+Na]+||[M+Na]+||[M+Na]+||[M+NH4]+||[M+NH4]+||[M+NH4]+||[M+NH4]+||[M+NH4]+||[M+NH4]+||[M+NH4]+||[M+NH4]+||[M+NH4]+||[M+NH4]+||[M+H]+||[M+H]+||[M+H]+||[M+H]+||[M+H]+||[M+H]+||[M+H]+||[M+H]+||[M+H]+||[M+H]+||[M+H]+||[M+H]+||[M+H]+||[M+H]+||[M+H]+	PS(14:0/22:2(13Z,16Z))||PS(14:1(9Z)/22:1(11Z))||PS(16:0/20:2(11Z,14Z))||PS(16:1(9Z)/20:1(11Z))||PS(17:1(9Z)/19:1(9Z))||PS(17:2(9Z,12Z)/19:0)||PS(18:0/18:2(9Z,12Z))||PS(18:1(9Z)/18:1(9Z))||PS(18:2(9Z,12Z)/18:0)||PS(19:0/17:2(9Z,12Z))||PS(19:1(9Z)/17:1(9Z))||PS(20:1(11Z)/16:1(9Z))||PS(20:2(11Z,14Z)/16:0)||PS(22:1(11Z)/14:1(9Z))||PS(22:2(13Z,16Z)/14:0)||PG(16:1(9Z)/22:6(4Z,7Z,10Z,13Z,16Z,19Z))||PG(1…	LMGP03010107||LMGP03010135||LMGP03010197||LMGP03010217||LMGP03010265||LMGP03010294||LMGP03010031||LMGP03010030||LMGP03010876||LMGP03010461||LMGP03010489||LMGP03010535||LMGP03010564||LMGP03010728||LMGP03010758||LMGP04010898||LMGP04010360||LMGP04010389||LMGP04010417||LMGP04010447||LMGP04010605||LMGP04010633||LMGP04010634||LMGP04010660||LMGP04010823||LMGP20010048||LMGP03010225||LMGP03010884||LMGP030…	-0.46||-0.46||-0.46||-0.46||-0.46||-0.46||-0.46||-0.46||-0.46||-0.46||-0.46||-0.46||-0.46||-0.46||-0.46||-3.42||-3.42||-3.42||-3.42||-3.42||-3.42||-3.42||-3.42||-3.42||-3.42||-3.42||-3.42||-3.42||-3.42||-3.42||-3.42||-3.42||-3.42||-3.42||-3.42||-3.42||-3.42||-3.42||-3.42||-3.42
810.59	C42H84NO11P||C42H84NO11P	[M+H]+||[M+H]+	PI-Cer(d18:0/18:0)||PI-Cer(d20:0/16:0)	LMSP03030007||LMSP03030024	4.98||4.98
810.6	C46H84NO8P||C46H84NO8P||C46H84NO8P||C46H84NO8P||C46H84NO8P||C46H84NO8P||C46H84NO8P||C46H84NO8P||C46H84NO8P||C46H84NO8P||C46H84NO8P||C46H84NO8P||C46H84NO8P||C46H84NO8P||C46H84NO8P||C46H84NO8P||C46H84NO8P||C46H84NO8P||C46H84NO8P||C46H84NO8P||C46H84NO8P||C46H84NO8P||C46H84NO8P||C46H84NO8P||C46H84NO8P||C46H84NO8P||C44H86NO8P||C44H86NO8P||C44H86NO8P||C44H86NO8P||C44H86NO8P||C44H86NO8P||C44H86NO8P||C44…	[M+H]+||[M+H]+||[M+H]+||[M+H]+||[M+H]+||[M+H]+||[M+H]+||[M+H]+||[M+H]+||[M+H]+||[M+H]+||[M+H]+||[M+H]+||[M+H]+||[M+H]+||[M+H]+||[M+H]+||[M+H]+||[M+H]+||[M+H]+||[M+H]+||[M+H]+||[M+H]+||[M+H]+||[M+H]+||[M+H]+||[M+Na]+||[M+Na]+||[M+Na]+||[M+Na]+||[M+Na]+||[M+Na]+||[M+Na]+||[M+Na]+||[M+Na]+||[M+Na]+||[M+Na]+||[M+Na]+||[M+Na]+||[M+Na]+||[M+Na]+||[M+Na]+||[M+Na]+||[M+Na]+||[M+Na]+||[M+Na]+||[M+Na]+||[M…	PC(16:0/22:4(7Z,10Z,13Z,16Z))||PC(18:0/20:4(5Z,8Z,11Z,14Z))||PC(18:0/20:4(8Z,10Z,12Z,14Z))||PC(18:0/20:4(8Z,11Z,14Z,17Z))||PC(18:1(11Z)/20:3(5Z,8Z,11Z))||PC(18:1(11Z)/20:3(8Z,11Z,14Z))||PC(18:1(9Z)/20:3(5Z,8Z,11Z))||PC(18:1(9Z)/20:3(8Z,11Z,14Z))||PC(18:2(9Z,12Z)/20:2(11Z,14Z))||PC(18:3(6Z,9Z,12Z)/20:1(11Z))||PC(18:3(9Z,12Z,15Z)/20:1(11Z))||PC(18:4(6Z,9Z,12Z,15Z)/20:0)||PC(20:0/18:4(6Z,9Z,12Z,15Z)…	LMGP01010642||LMGP01010802||LMGP01010804||LMGP01012144||LMGP01012154||LMGP01012155||LMGP01010904||LMGP01011609||LMGP01011632||LMGP01011660||LMGP01011689||LMGP01011719||LMGP01011796||LMGP01011819||LMGP01011820||LMGP01011848||LMGP01012197||LMGP01012198||LMGP01012206||LMGP01011878||LMGP01011907||LMGP01012072||LMGP02010791||LMGP02010956||LMGP02011010||LMGP02011119||LMGP01011376||LMGP01012129||LMGP010…	-1.05||-1.05||-1.05||-1.05||-1.05||-1.05||-1.05||-1.05||-1.05||-1.05||-1.05||-1.05||-1.05||-1.05||-1.05||-1.05||-1.05||-1.05||-1.05||-1.05||-1.05||-1.05||-1.05||-1.05||-1.05||-1.05||1.91||1.91||1.91||1.91||1.91||1.91||1.91||1.91||1.91||1.91||1.91||1.91||1.91||1.91||1.91||1.91||1.91||1.91||1.91||1.91||1.91||1.91||1.91||1.91||1.91||1.91||1.91||1.91||1.91||1.91||1.91||1.91||1.91||1.91||1.91||1.91
811.529	C46H77O8P	[M+Na]+	1-(8-[5]-ladderane-octanyl)-2-(8-[3]-ladderane-octanyl)-sn-glycero-3-phospho-(1-sn-glycerol)	LMGP04040004	4.54
811.668	C47H91N2O6P||C45H93N2O6P||C45H93N2O6P	[M+H]+||[M+Na]+||[M+Na]+	SM(d18:2/24:1)||SM(d16:0/24:0)||SM(d18:0/22:0)	LMSP03010080||LMSP03010100||LMSP03010022	-0.47||2.5||2.5
812.517	C45H76NO8P||C45H76NO8P||C45H76NO8P||C45H76NO8P||C45H76NO8P||C45H76NO8P||C45H76NO8P||C45H76NO8P||C45H76NO8P||C45H76NO8P||C45H76NO8P||C45H76NO8P||C45H76NO8P||C45H76NO8P	[M+Na]+||[M+Na]+||[M+Na]+||[M+Na]+||[M+Na]+||[M+Na]+||[M+Na]+||[M+Na]+||[M+Na]+||[M+Na]+||[M+Na]+||[M+Na]+||[M+Na]+||[M+Na]+	PC(15:1(9Z)/22:6(4Z,7Z,10Z,13Z,16Z,19Z))||PC(17:2(9Z,12Z)/20:5(5Z,8Z,11Z,14Z,17Z))||PC(20:5(5Z,8Z,11Z,14Z,17Z)/17:2(9Z,12Z))||PC(22:6(4Z,7Z,10Z,13Z,16Z,19Z)/15:1(9Z))||PE(18:1(9Z)/22:6(4Z,7Z,10Z,13Z,16Z,19Z))||PE(18:3(6Z,9Z,12Z)/22:4(7Z,10Z,13Z,16Z))||PE(18:3(9Z,12Z,15Z)/22:4(7Z,10Z,13Z,16Z))||PE(20:2(11Z,14Z)/20:5(5Z,8Z,11Z,14Z,17Z))||PE(20:3(8Z,11Z,14Z)/20:4(5Z,8Z,11Z,14Z))||PE(20:4(5Z,8Z,11Z,1…	LMGP01011461||LMGP01011574||LMGP01011936||LMGP01012102||LMGP02011264||LMGP02010708||LMGP02010736||LMGP02010895||LMGP02010925||LMGP02010954||LMGP02010982||LMGP02011116||LMGP02011117||LMGP02011143	-3.44||-3.44||-3.44||-3.44||-3.44||-3.44||-3.44||-3.44||-3.44||-3.44||-3.44||-3.44||-3.44||-3.44
812.541	C42H80NO10P||C42H80NO10P||C42H80NO10P||C42H80NO10P||C42H80NO10P||C42H80NO10P||C42H80NO10P||C42H80NO10P||C42H80NO10P||C42H80NO10P||C42H80NO10P||C42H80NO10P||C42H80NO10P||C42H80NO10P||C42H80NO10P||C42H80NO10P||C44H75O10P||C44H75O10P||C44H75O10P||C44H75O10P||C44H75O10P||C44H75O10P||C44H75O10P||C44H75O10P||C44H75O10P||C44H75O10P||C44H75O10P||C44H75O10P||C44H78NO10P||C44H78NO10P||C44H78NO10P||C44H78NO…	[M+Na]+||[M+Na]+||[M+Na]+||[M+Na]+||[M+Na]+||[M+Na]+||[M+Na]+||[M+Na]+||[M+Na]+||[M+Na]+||[M+Na]+||[M+Na]+||[M+Na]+||[M+Na]+||[M+Na]+||[M+Na]+||[M+NH4]+||[M+NH4]+||[M+NH4]+||[M+NH4]+||[M+NH4]+||[M+NH4]+||[M+NH4]+||[M+NH4]+||[M+NH4]+||[M+NH4]+||[M+NH4]+||[M+NH4]+||[M+H]+||[M+H]+||[M+H]+||[M+H]+||[M+H]+||[M+H]+||[M+H]+||[M+H]+||[M+H]+||[M+H]+||[M+H]+||[M+H]+||[M+H]+||[M+H]+||[M+H]+||[M+H]+	PS(14:0/22:1(11Z))||PS(14:1(9Z)/22:0)||PS(15:1(9Z)/21:0)||PS(16:0/20:1(11Z))||PS(16:1(9Z)/20:0)||PS(17:0/19:1(9Z))||PS(17:1(9Z)/19:0)||PS(18:0/18:1(9Z))||PS(18:1(9Z)/18:0)||PS(19:0/17:1(9Z))||PS(19:1(9Z)/17:0)||PS(20:0/16:1(9Z))||PS(20:1(11Z)/16:0)||PS(21:0/15:1(9Z))||PS(22:0/14:1(9Z))||PS(22:1(11Z)/14:0)||PG(16:0/22:6(4Z,7Z,10Z,13Z,16Z,19Z))||PG(18:1(9Z)/20:5(5Z,8Z,11Z,14Z,17Z))||PG(18:2(9Z,12Z)…	LMGP03010106||LMGP03010134||LMGP03010186||LMGP03010967||LMGP03010216||LMGP03010238||LMGP03010264||LMGP03010025||LMGP03010034||LMGP03010460||LMGP03010488||LMGP03010514||LMGP03010534||LMGP03010679||LMGP03010702||LMGP03010727||LMGP04010041||LMGP04010878||LMGP04010875||LMGP04010388||LMGP04010416||LMGP04010446||LMGP04010574||LMGP04010603||LMGP04010604||LMGP04010632||LMGP04010857||LMGP04010846||LMGP200…	0.14||0.14||0.14||0.14||0.14||0.14||0.14||0.14||0.14||0.14||0.14||0.14||0.14||0.14||0.14||0.14||-2.81||-2.81||-2.81||-2.81||-2.81||-2.81||-2.81||-2.81||-2.81||-2.81||-2.81||-2.81||-2.82||-2.82||-2.82||-2.82||-2.82||-2.82||-2.82||-2.82||-2.82||-2.82||-2.82||-2.82||-2.82||-2.82||-2.82||-2.82
812.616	C46H83O8P||C46H83O8P||C46H86NO8P||C46H86NO8P||C46H86NO8P||C46H86NO8P||C46H86NO8P||C46H86NO8P||C46H86NO8P||C46H86NO8P||C46H86NO8P||C46H86NO8P||C46H86NO8P||C46H86NO8P||C46H86NO8P||C46H86NO8P||C46H86NO8P||C46H86NO8P||C46H86NO8P||C46H86NO8P||C46H86NO8P||C46H86NO8P||C46H86NO8P||C46H86NO8P||C46H86NO8P||C44H88NO8P||C44H88NO8P||C44H88NO8P||C44H88NO8P||C44H88NO8P||C44H88NO8P||C44H88NO8P||C44H88NO8P||C44H8…	[M+NH4]+||[M+NH4]+||[M+H]+||[M+H]+||[M+H]+||[M+H]+||[M+H]+||[M+H]+||[M+H]+||[M+H]+||[M+H]+||[M+H]+||[M+H]+||[M+H]+||[M+H]+||[M+H]+||[M+H]+||[M+H]+||[M+H]+||[M+H]+||[M+H]+||[M+H]+||[M+H]+||[M+H]+||[M+H]+||[M+Na]+||[M+Na]+||[M+Na]+||[M+Na]+||[M+Na]+||[M+Na]+||[M+Na]+||[M+Na]+||[M+Na]+||[M+Na]+||[M+Na]+||[M+Na]+||[M+Na]+||[M+Na]+||[M+Na]+||[M+Na]+||[M+Na]+||[M+Na]+	PA(21:0/22:4(7Z,10Z,13Z,16Z))||PA(22:4(7Z,10Z,13Z,16Z)/21:0)||PC(16:1(9Z)/22:2(13Z,16Z))||PC(18:0/20:3(5Z,11Z,14Z))||PC(18:0/20:3(5Z,8Z,11Z))||PC(18:0/20:3(5Z,8Z,14Z))||PC(18:0/20:3(8Z,11Z,14Z))||PC(18:1(11Z)/20:2(11Z,14Z))||PC(18:1(9Z)/20:2(11Z,14Z))||PC(18:2(9Z,12Z)/20:1(11Z))||PC(18:2(9Z,12Z)/20:1(13Z))||PC(18:3(6Z,9Z,12Z)/20:0)||PC(18:3(9Z,12Z,15Z)/20:0)||PC(20:0/18:3(6Z,9Z,12Z))||PC(20:0/18:…	LMGP10010700||LMGP10010811||LMGP01011496||LMGP01010795||LMGP01010796||LMGP01010798||LMGP01010799||LMGP01012153||LMGP01011608||LMGP01011631||LMGP01010942||LMGP01011659||LMGP01011688||LMGP01011794||LMGP01011795||LMGP01011818||LMGP01012190||LMGP01011847||LMGP01012196||LMGP01011877||LMGP01012042||LMGP02010821||LMGP02010927||LMGP02011009||LMGP02011089||LMGP01010422||LMGP01010449||LMGP01010468||LMGP010…	-0.84||-0.84||-0.85||-0.85||-0.85||-0.85||-0.85||-0.85||-0.85||-0.85||-0.85||-0.85||-0.85||-0.85||-0.85||-0.85||-0.85||-0.85||-0.85||-0.85||-0.85||-0.85||-0.85||-0.85||-0.85||2.11||2.11||2.11||2.11||2.11||2.11||2.11||2.11||2.11||2.11||2.11||2.11||2.11||2.11||2.11||2.11||2.11||2.11
813.56	C43H83O10P||C43H83O10P||C43H83O10P||C43H83O10P||C43H83O10P||C43H83O10P||C43H83O10P||C43H83O10P||C43H83O10P||C43H83O10P||C43H83O10P||C43H83O10P||C43H83O10P||C43H83O10P	[M+Na]+||[M+Na]+||[M+Na]+||[M+Na]+||[M+Na]+||[M+Na]+||[M+Na]+||[M+Na]+||[M+Na]+||[M+Na]+||[M+Na]+||[M+Na]+||[M+Na]+||[M+Na]+	PG(15:0/22:1(11Z))||PG(15:1(9Z)/22:0)||PG(16:1(9Z)/21:0)||PG(17:0/20:1(11Z))||PG(17:1(9Z)/20:0)||PG(18:0/19:1(9Z))||PG(18:1(9Z)/19:0)||PG(19:0/18:1(9Z))||PG(19:1(9Z)/18:0)||PG(20:0/17:1(9Z))||PG(20:1(11Z)/17:0)||PG(21:0/16:1(9Z))||PG(22:0/15:1(9Z))||PG(22:1(11Z)/15:0)	LMGP04010157||LMGP04010187||LMGP04010221||LMGP04010239||LMGP04010266||LMGP04010318||LMGP04010332||LMGP04010462||LMGP04010491||LMGP04010516||LMGP04010536||LMGP04010681||LMGP04010704||LMGP04010729	-2.52||-2.52||-2.52||-2.52||-2.52||-2.52||-2.52||-2.52||-2.52||-2.52||-2.52||-2.52||-2.52||-2.52
813.61	C45H82NO8P||C45H82NO8P||C45H82NO8P||C45H82NO8P||C45H82NO8P||C45H82NO8P||C45H82NO8P||C45H82NO8P||C45H82NO8P||C45H82NO8P||C45H82NO8P||C45H82NO8P||C45H82NO8P||C45H82NO8P||C45H82NO8P||C45H82NO8P||C45H82NO8P||C45H82NO8P||C45H82NO8P||C45H82NO8P||C45H82NO8P||C45H82NO8P||C45H82NO8P||C45H82NO8P||C45H82NO8P||C45H82NO8P||C45H82NO8P||C45H82NO8P||C45H82NO8P	[M+NH4]+||[M+NH4]+||[M+NH4]+||[M+NH4]+||[M+NH4]+||[M+NH4]+||[M+NH4]+||[M+NH4]+||[M+NH4]+||[M+NH4]+||[M+NH4]+||[M+NH4]+||[M+NH4]+||[M+NH4]+||[M+NH4]+||[M+NH4]+||[M+NH4]+||[M+NH4]+||[M+NH4]+||[M+NH4]+||[M+NH4]+||[M+NH4]+||[M+NH4]+||[M+NH4]+||[M+NH4]+||[M+NH4]+||[M+NH4]+||[M+NH4]+||[M+NH4]+	PC(15:0/22:4(7Z,10Z,13Z,16Z))||PC(17:0/20:4(5Z,8Z,11Z,14Z))||PC(17:1(9Z)/20:3(8Z,11Z,14Z))||PC(17:2(9Z,12Z)/20:2(11Z,14Z))||PC(18:3(6Z,9Z,12Z)/19:1(9Z))||PC(18:3(9Z,12Z,15Z)/19:1(9Z))||PC(18:4(6Z,9Z,12Z,15Z)/19:0)||PC(19:0/18:4(6Z,9Z,12Z,15Z))||PC(19:1(9Z)/18:3(6Z,9Z,12Z))||PC(19:1(9Z)/18:3(9Z,12Z,15Z))||PC(20:2(11Z,14Z)/17:2(9Z,12Z))||PC(20:3(8Z,11Z,14Z)/17:1(9Z))||PC(20:4(5Z,8Z,11Z,14Z)/17:0)||…	LMGP01011429||LMGP01010003||LMGP01011542||LMGP01011571||LMGP01011658||LMGP01011687||LMGP01011717||LMGP01011742||LMGP01011770||LMGP01011771||LMGP01011845||LMGP01011875||LMGP01011904||LMGP01012070||LMGP02011200||LMGP02010677||LMGP02010706||LMGP02010734||LMGP02010764||LMGP02011177||LMGP02010862||LMGP02010892||LMGP02010922||LMGP02010951||LMGP02011027||LMGP02011054||LMGP02011055||LMGP02011084||LMGP020…	-2.39||-2.39||-2.39||-2.39||-2.39||-2.39||-2.39||-2.39||-2.39||-2.39||-2.39||-2.39||-2.39||-2.39||-2.39||-2.39||-2.39||-2.39||-2.39||-2.39||-2.39||-2.39||-2.39||-2.39||-2.39||-2.39||-2.39||-2.39||-2.39
813.684	C47H93N2O6P||C47H93N2O6P	[M+H]+||[M+H]+	SM(d18:1/24:1(15Z))||SM(d18:2/24:0)	LMSP03010007||LMSP03010081	-0.56||-0.56
813.692	C47H89NO8||C47H89NO8||C50H94O6||C50H94O6||C50H94O6||C50H94O6||C50H94O6||C50H94O6||C50H94O6||C50H94O6||C50H94O6||C50H94O6||C50H94O6||C50H94O6||C50H94O6||C50H94O6||C50H94O6||C50H94O6||C50H94O6||C50H94O6||C50H94O6||C50H94O6||C50H94O6||C50H94O6||C50H94O6||C50H94O6||C50H94O6||C50H94O6||C50H94O6	[M+NH4]+||[M+NH4]+||[M+Na]+||[M+Na]+||[M+Na]+||[M+Na]+||[M+Na]+||[M+Na]+||[M+Na]+||[M+Na]+||[M+Na]+||[M+Na]+||[M+Na]+||[M+Na]+||[M+Na]+||[M+Na]+||[M+Na]+||[M+Na]+||[M+Na]+||[M+Na]+||[M+Na]+||[M+Na]+||[M+Na]+||[M+Na]+||[M+Na]+||[M+Na]+||[M+Na]+||[M+Na]+||[M+Na]+	GalCer(d18:2/23:0)||GlcCer(d18:2/23:0)||TG(12:0/13:0/22:1(11Z))[iso6]||TG(12:0/14:1(9Z)/21:0)[iso6]||TG(12:0/15:0/20:1(11Z))[iso6]||TG(12:0/15:1(9Z)/20:0)[iso6]||TG(12:0/16:0/19:1(9Z))[iso6]||TG(12:0/16:1(9Z)/19:0)[iso6]||TG(12:0/17:0/18:1(9Z))[iso6]||TG(12:0/17:1(9Z)/18:0)[iso6]||TG(13:0/14:0/20:1(11Z))[iso6]||TG(13:0/14:1(9Z)/20:0)[iso6]||TG(13:0/15:0/19:1(9Z))[iso6]||TG(13:0/15:1(9Z)/19:0)[iso…	LMSP0501AC23||LMSP0501AA38||LMGL03013202||LMGL03013259||LMGL03013282||LMGL03013308||LMGL03013332||LMGL03013356||LMGL03013375||LMGL03013397||LMGL03013689||LMGL03013717||LMGL03013744||LMGL03013770||LMGL03013791||LMGL03013815||LMGL03013837||LMGL03012768||LMGL03014150||LMGL03014173||LMGL03014199||LMGL03014223||LMGL03014247||LMGL03014578||LMGL03014628||LMGL03012875||LMGL03014980||LMGL03015005||LMGL030…	-0.91||-0.91||-2.9||-2.9||-2.9||-2.9||-2.9||-2.9||-2.9||-2.9||-2.9||-2.9||-2.9||-2.9||-2.9||-2.9||-2.9||-2.9||-2.9||-2.9||-2.9||-2.9||-2.9||-2.9||-2.9||-2.9||-2.9||-2.9||-2.9
814.534	C45H78NO8P||C45H78NO8P||C45H78NO8P||C45H78NO8P||C45H78NO8P||C45H78NO8P||C45H78NO8P||C45H78NO8P||C45H78NO8P||C45H78NO8P||C45H78NO8P||C45H78NO8P||C45H78NO8P||C45H78NO8P||C45H78NO8P||C45H78NO8P||C45H78NO8P||C45H78NO8P	[M+Na]+||[M+Na]+||[M+Na]+||[M+Na]+||[M+Na]+||[M+Na]+||[M+Na]+||[M+Na]+||[M+Na]+||[M+Na]+||[M+Na]+||[M+Na]+||[M+Na]+||[M+Na]+||[M+Na]+||[M+Na]+||[M+Na]+||[M+Na]+	PC(15:0/22:6(4Z,7Z,10Z,13Z,16Z,19Z))||PC(17:1(9Z)/20:5(5Z,8Z,11Z,14Z,17Z))||PC(17:2(9Z,12Z)/20:4(5Z,8Z,11Z,14Z))||PC(20:4(5Z,8Z,11Z,14Z)/17:2(9Z,12Z))||PC(20:5(5Z,8Z,11Z,14Z,17Z)/17:1(9Z))||PC(22:6(4Z,7Z,10Z,13Z,16Z,19Z)/15:0)||PE(18:0/22:6(4Z,7Z,10Z,13Z,16Z,19Z))||PE(18:2(9Z,12Z)/22:4(7Z,10Z,13Z,16Z))||PE(18:4(6Z,9Z,12Z,15Z)/22:2(13Z,16Z))||PE(20:1(11Z)/20:5(5Z,8Z,11Z,14Z,17Z))||PE(20:2(11Z,14Z)…	LMGP01011430||LMGP01011544||LMGP01011573||LMGP01011906||LMGP01011935||LMGP01012101||LMGP02010094||LMGP02010678||LMGP02010766||LMGP02010864||LMGP02010894||LMGP02010924||LMGP02010953||LMGP02010981||LMGP02011087||LMGP02011115||LMGP02011142||LMGP20020015	-2.7||-2.7||-2.7||-2.7||-2.7||-2.7||-2.7||-2.7||-2.7||-2.7||-2.7||-2.7||-2.7||-2.7||-2.7||-2.7||-2.7||-2.7
814.631	C46H88NO8P||C46H88NO8P||C46H88NO8P||C46H88NO8P||C46H88NO8P||C46H88NO8P||C46H88NO8P||C46H88NO8P||C46H88NO8P||C46H88NO8P||C46H88NO8P||C46H88NO8P||C46H88NO8P||C46H88NO8P||C46H88NO8P||C46H88NO8P||C46H88NO8P||C46H88NO8P||C46H88NO8P||C46H88NO8P||C46H88NO8P||C46H88NO8P||C46H88NO8P||C46H88NO8P||C46H88NO8P	[M+H]+||[M+H]+||[M+H]+||[M+H]+||[M+H]+||[M+H]+||[M+H]+||[M+H]+||[M+H]+||[M+H]+||[M+H]+||[M+H]+||[M+H]+||[M+H]+||[M+H]+||[M+H]+||[M+H]+||[M+H]+||[M+H]+||[M+H]+||[M+H]+||[M+H]+||[M+H]+||[M+H]+||[M+H]+	PC(16:0/22:2(13Z,16Z))||PC(16:1(9Z)/22:1(11Z))||PC(17:2(9Z,12Z)/21:0)||PC(18:0/20:2(11Z,14Z))||PC(18:0/20:2(5Z,11Z))||PC(18:0/20:2(5Z,14Z))||PC(18:0/20:2(5Z,8Z))||PC(18:0/20:2(8Z,11Z))||PC(18:0/20:2(8Z,14Z))||PC(18:1(11Z)/20:1(13Z))||PC(18:1(9Z)/20:1(11Z))||PC(18:2(9Z,12Z)/20:0)||PC(19:1(9Z)/19:1(9Z))||PC(20:0/18:2(9Z,12Z))||PC(20:1(11Z)/18:1(9Z))||PC(20:2(11Z,14Z)/18:0)||PC(21:0/17:2(9Z,12Z))||P…	LMGP01011472||LMGP01011495||LMGP01011575||LMGP01010788||LMGP01010789||LMGP01010790||LMGP01010791||LMGP01010792||LMGP01010793||LMGP01010843||LMGP01011607||LMGP01011630||LMGP01011774||LMGP01011296||LMGP01011817||LMGP01011846||LMGP01011962||LMGP01012011||LMGP01012041||LMGP02010790||LMGP02010820||LMGP02010896||LMGP02011008||LMGP02011058||LMGP02011088	-0.87||-0.87||-0.87||-0.87||-0.87||-0.87||-0.87||-0.87||-0.87||-0.87||-0.87||-0.87||-0.87||-0.87||-0.87||-0.87||-0.87||-0.87||-0.87||-0.87||-0.87||-0.87||-0.87||-0.87||-0.87
815.699	C47H95N2O6P||C47H95N2O6P	[M+H]+||[M+H]+	SM(d18:0/24:1(15Z))||SM(d18:1/24:0)	LMSP03010023||LMSP03010008	-0.89||-0.89
816.647	C46H87O8P||C46H87O8P||C46H90NO8P||C46H90NO8P||C46H90NO8P||C46H90NO8P||C46H90NO8P||C46H90NO8P||C46H90NO8P||C46H90NO8P||C46H90NO8P||C46H90NO8P||C46H90NO8P||C46H90NO8P||C46H90NO8P||C46H90NO8P||C46H90NO8P||C46H90NO8P||C46H90NO8P||C46H90NO8P||C46H90NO8P||C46H90NO8P||C46H90NO8P||C46H90NO8P||C46H90NO8P||C46H90NO8P||C46H90NO8P||C46H90NO8P||C46H90NO8P||C46H90NO8P	[M+NH4]+||[M+NH4]+||[M+H]+||[M+H]+||[M+H]+||[M+H]+||[M+H]+||[M+H]+||[M+H]+||[M+H]+||[M+H]+||[M+H]+||[M+H]+||[M+H]+||[M+H]+||[M+H]+||[M+H]+||[M+H]+||[M+H]+||[M+H]+||[M+H]+||[M+H]+||[M+H]+||[M+H]+||[M+H]+||[M+H]+||[M+H]+||[M+H]+||[M+H]+||[M+H]+	PA(21:0/22:2(13Z,16Z))||PA(22:2(13Z,16Z)/21:0)||PC(14:0/24:1(15Z))||PC(16:0/22:1(11Z))||PC(16:0/22:1(13Z))||PC(16:1(9Z)/22:0)||PC(17:1(9Z)/21:0)||PC(18:0/20:1(11Z))||PC(18:0/20:1(13Z))||PC(18:0/20:1(14Z))||PC(18:0/20:1(5Z))||PC(18:0/20:1(8Z))||PC(18:1(9E)/20:0)||PC(18:1(9Z)/20:0)||PC(19:0/19:1(9Z))||PC(19:1(9Z)/19:0)||PC(20:0/18:1(11Z))||PC(20:0/18:1(6Z))||PC(20:0/18:1(7Z))||PC(20:0/18:1(9Z))||PC…	LMGP10010699||LMGP10010780||LMGP01010516||LMGP01011471||LMGP01010638||LMGP01011494||LMGP01011545||LMGP01010783||LMGP01010784||LMGP01010785||LMGP01010786||LMGP01010787||LMGP01010879||LMGP01010902||LMGP01011743||LMGP01011773||LMGP01011005||LMGP01011008||LMGP01011009||LMGP01011010||LMGP01011816||LMGP01011961||LMGP01011984||LMGP01012010||LMGP02010789||LMGP02010819||LMGP02010865||LMGP02011007||LMGP020…	-0.76||-0.76||-0.76||-0.76||-0.76||-0.76||-0.76||-0.76||-0.76||-0.76||-0.76||-0.76||-0.76||-0.76||-0.76||-0.76||-0.76||-0.76||-0.76||-0.76||-0.76||-0.76||-0.76||-0.76||-0.76||-0.76||-0.76||-0.76||-0.76||-0.76
818.498	C45H72NO10P||C45H72NO10P	[M+H]+||[M+H]+	PS(17:2(9Z,12Z)/22:6(4Z,7Z,10Z,13Z,16Z,19Z))||PS(22:6(4Z,7Z,10Z,13Z,16Z,19Z)/17:2(9Z,12Z))	LMGP03010307||LMGP03010826	2.07||2.07
819.512	C44H77O10P||C44H77O10P||C44H77O10P||C44H77O10P||C44H77O10P||C44H77O10P||C44H77O10P||C44H77O10P||C44H77O10P||C44H77O10P||C44H77O10P||C44H77O10P||C44H77O10P||C44H77O10P	[M+Na]+||[M+Na]+||[M+Na]+||[M+Na]+||[M+Na]+||[M+Na]+||[M+Na]+||[M+Na]+||[M+Na]+||[M+Na]+||[M+Na]+||[M+Na]+||[M+Na]+||[M+Na]+	PG(16:1(9Z)/22:4(7Z,10Z,13Z,16Z))||PG(18:0/20:5(5Z,8Z,11Z,14Z,17Z))||PG(18:1(9Z)/20:4(5Z,8Z,11Z,14Z))||PG(18:2(9Z,12Z)/20:3(8Z,11Z,14Z))||PG(18:3(6Z,9Z,12Z)/20:2(11Z,14Z))||PG(18:3(9Z,12Z,15Z)/20:2(11Z,14Z))||PG(18:4(6Z,9Z,12Z,15Z)/20:1(11Z))||PG(20:1(11Z)/18:4(6Z,9Z,12Z,15Z))||PG(20:2(11Z,14Z)/18:3(6Z,9Z,12Z))||PG(20:2(11Z,14Z)/18:3(9Z,12Z,15Z))||PG(20:3(8Z,11Z,14Z)/18:2(9Z,12Z))||PG(20:4(5Z,8Z,…	LMGP04010225||LMGP04010884||LMGP04010879||LMGP04010359||LMGP04010387||LMGP04010415||LMGP04010445||LMGP04010544||LMGP04010572||LMGP04010573||LMGP04010602||LMGP04010631||LMGP04010659||LMGP04010794	-3.08||-3.08||-3.08||-3.08||-3.08||-3.08||-3.08||-3.08||-3.08||-3.08||-3.08||-3.08||-3.08||-3.08
820.583	C45H84NO8P||C45H84NO8P||C45H84NO8P||C45H84NO8P||C45H84NO8P||C45H84NO8P||C45H84NO8P||C45H84NO8P||C45H84NO8P||C45H84NO8P||C45H84NO8P||C45H84NO8P||C45H84NO8P||C45H84NO8P||C45H84NO8P||C45H84NO8P||C45H84NO8P||C45H84NO8P||C45H84NO8P||C45H84NO8P||C45H84NO8P||C45H84NO8P||C45H84NO8P||C45H84NO8P||C45H84NO8P||C45H84NO8P||C47H79O8P||C47H79O8P||C47H82NO8P||C47H82NO8P||C47H82NO8P||C47H82NO8P||C47H82NO8P||C47H8…	[M+Na]+||[M+Na]+||[M+Na]+||[M+Na]+||[M+Na]+||[M+Na]+||[M+Na]+||[M+Na]+||[M+Na]+||[M+Na]+||[M+Na]+||[M+Na]+||[M+Na]+||[M+Na]+||[M+Na]+||[M+Na]+||[M+Na]+||[M+Na]+||[M+Na]+||[M+Na]+||[M+Na]+||[M+Na]+||[M+Na]+||[M+Na]+||[M+Na]+||[M+Na]+||[M+NH4]+||[M+NH4]+||[M+H]+||[M+H]+||[M+H]+||[M+H]+||[M+H]+||[M+H]+||[M+H]+||[M+H]+||[M+H]+||[M+H]+||[M+H]+||[M+H]+||[M+H]+||[M+H]+	PC(15:1(9Z)/22:2(13Z,16Z))||PC(17:0/20:3(8Z,11Z,14Z))||PC(17:1(9Z)/20:2(11Z,14Z))||PC(17:2(9Z,12Z)/20:1(11Z))||PC(18:2(9Z,12Z)/19:1(9Z))||PC(18:3(6Z,9Z,12Z)/19:0)||PC(18:3(9Z,12Z,15Z)/19:0)||PC(19:0/18:3(6Z,9Z,12Z))||PC(19:0/18:3(9Z,12Z,15Z))||PC(19:1(9Z)/18:2(9Z,12Z))||PC(20:1(11Z)/17:2(9Z,12Z))||PC(20:2(11Z,14Z)/17:1(9Z))||PC(20:3(8Z,11Z,14Z)/17:0)||PC(22:2(13Z,16Z)/15:1(9Z))||PE(18:1(9Z)/22:2(…	LMGP01011459||LMGP01011514||LMGP01011541||LMGP01011570||LMGP01011629||LMGP01011657||LMGP01011686||LMGP01011740||LMGP01011741||LMGP01011769||LMGP01011815||LMGP01011844||LMGP01011874||LMGP01012040||LMGP02010651||LMGP02010676||LMGP02010705||LMGP02010733||LMGP02010835||LMGP02010861||LMGP02010891||LMGP02010921||LMGP02011025||LMGP02011026||LMGP02011053||LMGP02011083||LMGP10010754||LMGP10010842||LMGP010…	-0.2||-0.2||-0.2||-0.2||-0.2||-0.2||-0.2||-0.2||-0.2||-0.2||-0.2||-0.2||-0.2||-0.2||-0.2||-0.2||-0.2||-0.2||-0.2||-0.2||-0.2||-0.2||-0.2||-0.2||-0.2||-0.2||-3.13||-3.13||-3.13||-3.13||-3.13||-3.13||-3.13||-3.13||-3.13||-3.13||-3.13||-3.13||-3.13||-3.13||-3.13||-3.13
821.528	C44H79O10P||C44H79O10P||C44H79O10P||C44H79O10P||C44H79O10P||C44H79O10P||C44H79O10P||C44H79O10P||C44H79O10P||C44H79O10P||C44H79O10P||C44H79O10P||C44H79O10P||C44H79O10P	[M+Na]+||[M+Na]+||[M+Na]+||[M+Na]+||[M+Na]+||[M+Na]+||[M+Na]+||[M+Na]+||[M+Na]+||[M+Na]+||[M+Na]+||[M+Na]+||[M+Na]+||[M+Na]+	PG(16:0/22:4(7Z,10Z,13Z,16Z))||PG(18:0/20:4(5Z,8Z,11Z,14Z))||PG(18:1(9Z)/20:3(8Z,11Z,14Z))||PG(18:2(9Z,12Z)/20:2(11Z,14Z))||PG(18:3(6Z,9Z,12Z)/20:1(11Z))||PG(18:3(9Z,12Z,15Z)/20:1(11Z))||PG(18:4(6Z,9Z,12Z,15Z)/20:0)||PG(20:0/18:4(6Z,9Z,12Z,15Z))||PG(20:1(11Z)/18:3(6Z,9Z,12Z))||PG(20:1(11Z)/18:3(9Z,12Z,15Z))||PG(20:2(11Z,14Z)/18:2(9Z,12Z))||PG(20:3(8Z,11Z,14Z)/18:1(9Z))||PG(20:4(5Z,8Z,11Z,14Z)/18:…	LMGP04010968||LMGP04010039||LMGP04010335||LMGP04010358||LMGP04010386||LMGP04010414||LMGP04010444||LMGP04010950||LMGP04010542||LMGP04010543||LMGP04010571||LMGP04010601||LMGP04010630||LMGP04010793	-2.62||-2.62||-2.62||-2.62||-2.62||-2.62||-2.62||-2.62||-2.62||-2.62||-2.62||-2.62||-2.62||-2.62
823.544	C44H81O10P||C44H81O10P||C44H81O10P||C44H81O10P||C44H81O10P||C44H81O10P||C44H81O10P||C44H81O10P||C44H81O10P||C44H81O10P||C44H81O10P||C44H81O10P	[M+Na]+||[M+Na]+||[M+Na]+||[M+Na]+||[M+Na]+||[M+Na]+||[M+Na]+||[M+Na]+||[M+Na]+||[M+Na]+||[M+Na]+||[M+Na]+	PG(16:1(9Z)/22:2(13Z,16Z))||PG(18:0/20:3(8Z,11Z,14Z))||PG(18:1(9Z)/20:2(11Z,14Z))||PG(18:2(9Z,12Z)/20:1(11Z))||PG(18:3(6Z,9Z,12Z)/20:0)||PG(18:3(9Z,12Z,15Z)/20:0)||PG(20:0/18:3(6Z,9Z,12Z))||PG(20:0/18:3(9Z,12Z,15Z))||PG(20:1(11Z)/18:2(9Z,12Z))||PG(20:2(11Z,14Z)/18:1(9Z))||PG(20:3(8Z,11Z,14Z)/18:0)||PG(22:2(13Z,16Z)/16:1(9Z))	LMGP04010224||LMGP04010885||LMGP04010334||LMGP04010357||LMGP04010385||LMGP04010413||LMGP04010518||LMGP04010519||LMGP04010541||LMGP04010570||LMGP04010600||LMGP04010763	-2.45||-2.45||-2.45||-2.45||-2.45||-2.45||-2.45||-2.45||-2.45||-2.45||-2.45||-2.45
823.666	C46H93N2O6P||C46H93N2O6P||C46H93N2O6P||C48H88NO6P	[M+Na]+||[M+Na]+||[M+Na]+||[M+NH4]+	SM(d16:1/25:0)||SM(d17:1/24:0)||SM(d18:1/23:0)||1-(2E,6E,10E-phytatrienyl)-2-(2E,6E10E-phytatrienyl)-sn-glycero-3-phosphocholine	LMSP03010076||LMSP03010077||LMSP03010078||LMGP01040097	-0.33||-0.33||-0.33||-3.24
824.556	C42H81NO12S	[M+H]+	(3-sulfo)Galbeta-Cer(d18:1/18:0(2OH))	LMSP06020004	1.14
824.673	C45H91O9P||C45H91O9P||C52H86O6||C52H86O6||C52H86O6||C52H86O6||C52H86O6||C52H86O6||C52H86O6	[M+NH4]+||[M+NH4]+||[M+NH4]+||[M+NH4]+||[M+NH4]+||[M+NH4]+||[M+NH4]+||[M+NH4]+||[M+NH4]+	PG(O-18:0/21:0)||PG(O-20:0/19:0)||TG(12:0/15:1(9Z)/22:6(4Z,7Z,10Z,13Z,16Z,19Z))[iso6]||TG(12:0/17:2(9Z,12Z)/20:5(5Z,8Z,11Z,14Z,17Z))[iso6]||TG(13:0/14:1(9Z)/22:6(4Z,7Z,10Z,13Z,16Z,19Z))[iso6]||TG(13:0/18:3(6Z,9Z,12Z)/18:4(6Z,9Z,12Z,15Z))[iso6]||TG(13:0/18:3(9Z,12Z,15Z)/18:4(6Z,9Z,12Z,15Z))[iso6]||TG(14:1(9Z)/15:1(9Z)/20:5(5Z,8Z,11Z,14Z,17Z))[iso6]||TG(14:1(9Z)/17:2(9Z,12Z)/18:4(6Z,9Z,12Z,15Z))[is…	LMGP04020037||LMGP04020057||LMGL03013321||LMGL03013432||LMGL03013730||LMGL03013967||LMGL03013984||LMGL03014618||LMGL03014730	-1.11||-1.11||-3.98||-3.98||-3.98||-3.98||-3.98||-3.98||-3.98
825.542	C47H79O8P||C47H79O8P||C44H74NO10P||C44H74NO10P||C44H74NO10P||C44H74NO10P||C44H74NO10P||C44H74NO10P||C44H74NO10P||C44H74NO10P||C44H74NO10P||C44H74NO10P||C44H74NO10P||C44H74NO10P	[M+Na]+||[M+Na]+||[M+NH4]+||[M+NH4]+||[M+NH4]+||[M+NH4]+||[M+NH4]+||[M+NH4]+||[M+NH4]+||[M+NH4]+||[M+NH4]+||[M+NH4]+||[M+NH4]+||[M+NH4]+	PA(22:1(11Z)/22:6(4Z,7Z,10Z,13Z,16Z,19Z))||PA(22:6(4Z,7Z,10Z,13Z,16Z,19Z)/22:1(11Z))||PS(16:0/22:6(4Z,7Z,10Z,13Z,16Z,19Z))||PS(18:1(9Z)/20:5(5Z,8Z,11Z,14Z,17Z))||PS(18:2(9Z,12Z)/20:4(5Z,8Z,11Z,14Z))||PS(18:3(6Z,9Z,12Z)/20:3(8Z,11Z,14Z))||PS(18:3(9Z,12Z,15Z)/20:3(8Z,11Z,14Z))||PS(18:4(6Z,9Z,12Z,15Z)/20:2(11Z,14Z))||PS(20:2(11Z,14Z)/18:4(6Z,9Z,12Z,15Z))||PS(20:3(8Z,11Z,14Z)/18:3(6Z,9Z,12Z))||PS(20:…	LMGP10010754||LMGP10010842||LMGP03010043||LMGP03010878||LMGP03010875||LMGP03010388||LMGP03010416||LMGP03010446||LMGP03010574||LMGP03010603||LMGP03010604||LMGP03010632||LMGP03010857||LMGP03010846	1.73||1.73||3.69||3.69||3.69||3.69||3.69||3.69||3.69||3.69||3.69||3.69||3.69||3.69
825.56	C44H83O10P||C44H83O10P||C44H83O10P||C44H83O10P||C44H83O10P||C44H83O10P||C44H83O10P||C44H83O10P||C44H83O10P||C44H83O10P||C44H83O10P||C44H83O10P||C44H83O10P	[M+Na]+||[M+Na]+||[M+Na]+||[M+Na]+||[M+Na]+||[M+Na]+||[M+Na]+||[M+Na]+||[M+Na]+||[M+Na]+||[M+Na]+||[M+Na]+||[M+Na]+	PG(16:0/22:2(13Z,16Z))||PG(16:1(9Z)/22:1(11Z))||PG(17:2(9Z,12Z)/21:0)||PG(18:0/20:2(11Z,14Z))||PG(18:1(9Z)/20:1(11Z))||PG(18:2(9Z,12Z)/20:0)||PG(19:1(9Z)/19:1(9Z))||PG(20:0/18:2(9Z,12Z))||PG(20:1(11Z)/18:1(9Z))||PG(20:2(11Z,14Z)/18:0)||PG(21:0/17:2(9Z,12Z))||PG(22:1(11Z)/16:1(9Z))||PG(22:2(13Z,16Z)/16:0)	LMGP04010200||LMGP04010223||LMGP04010302||LMGP04010963||LMGP04010958||LMGP04010356||LMGP04010498||LMGP04010951||LMGP04010540||LMGP04010569||LMGP04010684||LMGP04010732||LMGP04010762	-2.49||-2.49||-2.49||-2.49||-2.49||-2.49||-2.49||-2.49||-2.49||-2.49||-2.49||-2.49||-2.49
825.679	C46H95N2O6P||C46H95N2O6P	[M+Na]+||[M+Na]+	SM(d16:0/25:0)||SM(d18:0/23:0)	LMSP03010097||LMSP03010096	-3.52||-3.52
826.475	C39H69O15P||C44H69NO12	[M+NH4]+||[M+Na]+	OHODA-PI||Tacrolimus	LMGP20050035||LMPK04000003	4.43||4.47
826.554	C43H82NO10P||C43H82NO10P||C43H82NO10P||C43H82NO10P||C43H82NO10P||C43H82NO10P||C43H82NO10P||C43H82NO10P||C43H82NO10P||C43H82NO10P||C43H82NO10P||C43H82NO10P||C43H82NO10P||C43H82NO10P||C43H82NO10P	[M+Na]+||[M+Na]+||[M+Na]+||[M+Na]+||[M+Na]+||[M+Na]+||[M+Na]+||[M+Na]+||[M+Na]+||[M+Na]+||[M+Na]+||[M+Na]+||[M+Na]+||[M+Na]+||[M+Na]+	PS(15:0/22:1(11Z))||PS(15:1(9Z)/22:0)||PS(16:1(9Z)/21:0)||PS(17:0/20:1(11Z))||PS(17:1(9Z)/20:0)||PS(18:0/19:1(9Z))||PS(18:1(9Z)/19:0)||PS(19:0/18:1(9Z))||PS(19:1(9Z)/18:0)||PS(20:0/17:1(9Z))||PS(20:1(11Z)/17:0)||PS(21:0/16:1(9Z))||PS(22:0/15:1(9Z))||PS(22:1(11Z)/15:0)||PT(18:0/18:1(9Z))	LMGP03010157||LMGP03010187||LMGP03010221||LMGP03010239||LMGP03010266||LMGP03010318||LMGP03010332||LMGP03010462||LMGP03010491||LMGP03010516||LMGP03010536||LMGP03010681||LMGP03010704||LMGP03010729||LMGP00000048	-3.82||-3.82||-3.82||-3.82||-3.82||-3.82||-3.82||-3.82||-3.82||-3.82||-3.82||-3.82||-3.82||-3.82||-3.82
826.563	C45H80NO10P||C45H80NO10P||C45H80NO10P||C45H80NO10P||C45H80NO10P||C45H80NO10P||C45H80NO10P||C45H80NO10P||C45H80NO10P||C45H80NO10P||C45H77O10P||C45H77O10P||C45H77O10P||C45H77O10P||C45H77O10P||C45H77O10P	[M+H]+||[M+H]+||[M+H]+||[M+H]+||[M+H]+||[M+H]+||[M+H]+||[M+H]+||[M+H]+||[M+H]+||[M+NH4]+||[M+NH4]+||[M+NH4]+||[M+NH4]+||[M+NH4]+||[M+NH4]+	PS(17:0/22:4(7Z,10Z,13Z,16Z))||PS(17:2(9Z,12Z)/22:2(13Z,16Z))||PS(18:4(6Z,9Z,12Z,15Z)/21:0)||PS(19:0/20:4(5Z,8Z,11Z,14Z))||PS(19:1(9Z)/20:3(8Z,11Z,14Z))||PS(20:3(8Z,11Z,14Z)/19:1(9Z))||PS(20:4(5Z,8Z,11Z,14Z)/19:0)||PS(21:0/18:4(6Z,9Z,12Z,15Z))||PS(22:2(13Z,16Z)/17:2(9Z,12Z))||PS(22:4(7Z,10Z,13Z,16Z)/17:0)||PG(17:0/22:6(4Z,7Z,10Z,13Z,16Z,19Z))||PG(17:2(9Z,12Z)/22:4(7Z,10Z,13Z,16Z))||PG(19:1(9Z)/20…	LMGP03010247||LMGP03010305||LMGP03010450||LMGP03010472||LMGP03010502||LMGP03010607||LMGP03010636||LMGP03010689||LMGP03010766||LMGP03010795||LMGP04010892||LMGP04010306||LMGP04010504||LMGP04010665||LMGP04010797||LMGP04010824	3.94||3.94||3.94||3.94||3.94||3.94||3.94||3.94||3.94||3.94||3.94||3.94||3.94||3.94||3.94||3.94
827.557	C47H81O8P||C47H81O8P||C47H81O8P||C47H81O8P||C44H76NO10P||C44H76NO10P||C44H76NO10P||C44H76NO10P||C44H76NO10P||C44H76NO10P||C44H76NO10P||C44H76NO10P||C44H76NO10P||C44H76NO10P||C44H76NO10P||C44H76NO10P||C44H76NO10P||C44H76NO10P||C44H76NO10P	[M+Na]+||[M+Na]+||[M+Na]+||[M+Na]+||[M+NH4]+||[M+NH4]+||[M+NH4]+||[M+NH4]+||[M+NH4]+||[M+NH4]+||[M+NH4]+||[M+NH4]+||[M+NH4]+||[M+NH4]+||[M+NH4]+||[M+NH4]+||[M+NH4]+||[M+NH4]+||[M+NH4]+	PA(22:0/22:6(4Z,7Z,10Z,13Z,16Z,19Z))||PA(22:2(13Z,16Z)/22:4(7Z,10Z,13Z,16Z))||PA(22:4(7Z,10Z,13Z,16Z)/22:2(13Z,16Z))||PA(22:6(4Z,7Z,10Z,13Z,16Z,19Z)/22:0)||PECPC||PS(16:1(9Z)/22:4(7Z,10Z,13Z,16Z))||PS(18:0/20:5(5Z,8Z,11Z,14Z,17Z))||PS(18:1(9Z)/20:4(5Z,8Z,11Z,14Z))||PS(18:2(9Z,12Z)/20:3(8Z,11Z,14Z))||PS(18:3(6Z,9Z,12Z)/20:2(11Z,14Z))||PS(18:3(9Z,12Z,15Z)/20:2(11Z,14Z))||PS(18:4(6Z,9Z,12Z,15Z)/20:1…	LMGP10010043||LMGP10010784||LMGP10010814||LMGP10010841||LMGP20010048||LMGP03010225||LMGP03010884||LMGP03010879||LMGP03010359||LMGP03010387||LMGP03010415||LMGP03010445||LMGP03010544||LMGP03010572||LMGP03010573||LMGP03010602||LMGP03010631||LMGP03010659||LMGP03010794	1.47||1.47||1.47||1.47||3.43||3.43||3.43||3.43||3.43||3.43||3.43||3.43||3.43||3.43||3.43||3.43||3.43||3.43||3.43
828.551	C46H80NO8P||C46H80NO8P||C46H80NO8P||C46H80NO8P||C46H80NO8P||C46H80NO8P||C46H80NO8P||C46H80NO8P||C46H80NO8P||C46H80NO8P||C46H80NO8P||C46H80NO8P||C46H80NO8P||C46H80NO8P||C46H80NO8P||C46H80NO8P||C46H80NO8P||C46H80NO8P||C46H80NO8P||C46H80NO8P||C46H80NO8P||C46H80NO8P||C46H80NO8P||C46H80NO8P||C46H80NO8P||C46H80NO8P||C48H78NO8P||C48H78NO8P||C48H78NO8P||C48H78NO8P||C48H78NO8P||C48H78NO8P	[M+Na]+||[M+Na]+||[M+Na]+||[M+Na]+||[M+Na]+||[M+Na]+||[M+Na]+||[M+Na]+||[M+Na]+||[M+Na]+||[M+Na]+||[M+Na]+||[M+Na]+||[M+Na]+||[M+Na]+||[M+Na]+||[M+Na]+||[M+Na]+||[M+Na]+||[M+Na]+||[M+Na]+||[M+Na]+||[M+Na]+||[M+Na]+||[M+Na]+||[M+Na]+||[M+H]+||[M+H]+||[M+H]+||[M+H]+||[M+H]+||[M+H]+	PC(16:0/22:6(4E,7E,10E,13E,16E,19E))||PC(16:0/22:6(4Z,7Z,10Z,13Z,16Z,19Z))||PC(16:1(9Z)/22:5(4Z,7Z,10Z,13Z,16Z))||PC(16:1(9Z)/22:5(7Z,10Z,13Z,16Z,19Z))||PC(18:1(11Z)/20:5(5Z,8Z,11Z,14Z,17Z))||PC(18:1(9Z)/20:5(5Z,8Z,11Z,14Z,17Z))||PC(18:2(9Z,12Z)/20:4(5Z,8Z,11Z,14Z))||PC(18:2(9Z,12Z)/20:4(8Z,11Z,14Z,17Z))||PC(18:3(6Z,9Z,12Z)/20:3(5Z,8Z,11Z))||PC(18:3(6Z,9Z,12Z)/20:3(8Z,11Z,14Z))||PC(18:3(9Z,12Z,15…	LMGP01010650||LMGP01012137||LMGP01012140||LMGP01012141||LMGP01010844||LMGP01010907||LMGP01010943||LMGP01012171||LMGP01012175||LMGP01011662||LMGP01012179||LMGP01011691||LMGP01011721||LMGP01011851||LMGP01012200||LMGP01012201||LMGP01011880||LMGP01011881||LMGP01011909||LMGP01012212||LMGP01012216||LMGP01011057||LMGP01011115||LMGP01011116||LMGP02010792||LMGP02011148||LMGP01011670||LMGP01011699||LMGP010…	-0.49||-0.49||-0.49||-0.49||-0.49||-0.49||-0.49||-0.49||-0.49||-0.49||-0.49||-0.49||-0.49||-0.49||-0.49||-0.49||-0.49||-0.49||-0.49||-0.49||-0.49||-0.49||-0.49||-0.49||-0.49||-0.49||-3.39||-3.39||-3.39||-3.39||-3.39||-3.39
828.578	C45H82NO10P||C45H82NO10P||C45H82NO10P||C45H82NO10P||C45H82NO10P||C45H82NO10P||C45H82NO10P||C45H82NO10P||C45H82NO10P||C45H82NO10P||C45H82NO10P||C45H82NO10P||C45H79O10P||C45H79O10P||C45H79O10P||C45H79O10P||C45H79O10P||C45H79O10P	[M+H]+||[M+H]+||[M+H]+||[M+H]+||[M+H]+||[M+H]+||[M+H]+||[M+H]+||[M+H]+||[M+H]+||[M+H]+||[M+H]+||[M+NH4]+||[M+NH4]+||[M+NH4]+||[M+NH4]+||[M+NH4]+||[M+NH4]+	PS(17:1(9Z)/22:2(13Z,16Z))||PS(17:2(9Z,12Z)/22:1(11Z))||PS(18:3(6Z,9Z,12Z)/21:0)||PS(18:3(9Z,12Z,15Z)/21:0)||PS(19:0/20:3(8Z,11Z,14Z))||PS(19:1(9Z)/20:2(11Z,14Z))||PS(20:2(11Z,14Z)/19:1(9Z))||PS(20:3(8Z,11Z,14Z)/19:0)||PS(21:0/18:3(6Z,9Z,12Z))||PS(21:0/18:3(9Z,12Z,15Z))||PS(22:1(11Z)/17:2(9Z,12Z))||PS(22:2(13Z,16Z)/17:1(9Z))||PG(17:1(9Z)/22:4(7Z,10Z,13Z,16Z))||PG(19:0/20:5(5Z,8Z,11Z,14Z,17Z))||PG…	LMGP03010275||LMGP03010304||LMGP03010391||LMGP03010419||LMGP03010471||LMGP03010501||LMGP03010576||LMGP03010606||LMGP03010687||LMGP03010688||LMGP03010735||LMGP03010765||LMGP04010276||LMGP04010473||LMGP04010503||LMGP04010637||LMGP04010664||LMGP04010796	3.89||3.89||3.89||3.89||3.89||3.89||3.89||3.89||3.89||3.89||3.89||3.89||3.89||3.89||3.89||3.89||3.89||3.89
830.49	C42H68O15	[M+NH4]+	bayogenin 3-O-cellobioside	LMPR0106150009	0.06
831.532	C42H81O12P||C42H81O12P||C42H81O12P||C42H81O12P||C42H81O12P	[M+Na]+||[M+Na]+||[M+Na]+||[M+Na]+||[M+Na]+	PI(O-16:0/17:1(9Z))||PI(O-18:0/15:1(9Z))||PI(P-16:0/17:0)||PI(P-18:0/15:0)||PI(P-20:0/13:0)	LMGP06020009||LMGP06020024||LMGP06030010||LMGP06030033||LMGP06030058	-4.91||-4.91||-4.91||-4.91||-4.91
832.507	C44H76NO10P||C44H76NO10P||C44H76NO10P||C44H76NO10P||C44H76NO10P||C44H76NO10P||C44H76NO10P||C44H76NO10P||C44H76NO10P||C44H76NO10P||C44H76NO10P||C44H76NO10P||C44H76NO10P||C44H76NO10P||C44H76NO10P	[M+Na]+||[M+Na]+||[M+Na]+||[M+Na]+||[M+Na]+||[M+Na]+||[M+Na]+||[M+Na]+||[M+Na]+||[M+Na]+||[M+Na]+||[M+Na]+||[M+Na]+||[M+Na]+||[M+Na]+	PECPC||PS(16:1(9Z)/22:4(7Z,10Z,13Z,16Z))||PS(18:0/20:5(5Z,8Z,11Z,14Z,17Z))||PS(18:1(9Z)/20:4(5Z,8Z,11Z,14Z))||PS(18:2(9Z,12Z)/20:3(8Z,11Z,14Z))||PS(18:3(6Z,9Z,12Z)/20:2(11Z,14Z))||PS(18:3(9Z,12Z,15Z)/20:2(11Z,14Z))||PS(18:4(6Z,9Z,12Z,15Z)/20:1(11Z))||PS(20:1(11Z)/18:4(6Z,9Z,12Z,15Z))||PS(20:2(11Z,14Z)/18:3(6Z,9Z,12Z))||PS(20:2(11Z,14Z)/18:3(9Z,12Z,15Z))||PS(20:3(8Z,11Z,14Z)/18:2(9Z,12Z))||PS(20:4…	LMGP20010048||LMGP03010225||LMGP03010884||LMGP03010879||LMGP03010359||LMGP03010387||LMGP03010415||LMGP03010445||LMGP03010544||LMGP03010572||LMGP03010573||LMGP03010602||LMGP03010631||LMGP03010659||LMGP03010794	-3.45||-3.45||-3.45||-3.45||-3.45||-3.45||-3.45||-3.45||-3.45||-3.45||-3.45||-3.45||-3.45||-3.45||-3.45
833.65	C47H91N2O6P	[M+Na]+	SM(d18:2/24:1)	LMSP03010080	-0.62
834.598	C46H86NO8P||C46H86NO8P||C46H86NO8P||C46H86NO8P||C46H86NO8P||C46H86NO8P||C46H86NO8P||C46H86NO8P||C46H86NO8P||C46H86NO8P||C46H86NO8P||C46H86NO8P||C46H86NO8P||C46H86NO8P||C46H86NO8P||C46H86NO8P||C46H86NO8P||C46H86NO8P||C46H86NO8P||C46H86NO8P||C46H86NO8P||C46H86NO8P||C46H86NO8P||C48H84NO8P||C48H84NO8P||C48H84NO8P||C48H84NO8P||C48H84NO8P||C48H84NO8P||C48H84NO8P||C48H84NO8P||C48H84NO8P||C48H84NO8P||C48…	[M+Na]+||[M+Na]+||[M+Na]+||[M+Na]+||[M+Na]+||[M+Na]+||[M+Na]+||[M+Na]+||[M+Na]+||[M+Na]+||[M+Na]+||[M+Na]+||[M+Na]+||[M+Na]+||[M+Na]+||[M+Na]+||[M+Na]+||[M+Na]+||[M+Na]+||[M+Na]+||[M+Na]+||[M+Na]+||[M+Na]+||[M+H]+||[M+H]+||[M+H]+||[M+H]+||[M+H]+||[M+H]+||[M+H]+||[M+H]+||[M+H]+||[M+H]+||[M+H]+||[M+H]+||[M+H]+||[M+H]+||[M+H]+	PC(16:1(9Z)/22:2(13Z,16Z))||PC(18:0/20:3(5Z,11Z,14Z))||PC(18:0/20:3(5Z,8Z,11Z))||PC(18:0/20:3(5Z,8Z,14Z))||PC(18:0/20:3(8Z,11Z,14Z))||PC(18:1(11Z)/20:2(11Z,14Z))||PC(18:1(9Z)/20:2(11Z,14Z))||PC(18:2(9Z,12Z)/20:1(11Z))||PC(18:2(9Z,12Z)/20:1(13Z))||PC(18:3(6Z,9Z,12Z)/20:0)||PC(18:3(9Z,12Z,15Z)/20:0)||PC(20:0/18:3(6Z,9Z,12Z))||PC(20:0/18:3(9Z,12Z,15Z))||PC(20:1(11Z)/18:2(9Z,12Z))||PC(20:2(11Z,14Z)/1…	LMGP01011496||LMGP01010795||LMGP01010796||LMGP01010798||LMGP01010799||LMGP01012153||LMGP01011608||LMGP01011631||LMGP01010942||LMGP01011659||LMGP01011688||LMGP01011794||LMGP01011795||LMGP01011818||LMGP01012190||LMGP01011847||LMGP01012196||LMGP01011877||LMGP01012042||LMGP02010821||LMGP02010927||LMGP02011009||LMGP02011089||LMGP01010821||LMGP01010823||LMGP01010846||LMGP01011639||LMGP01011728||LMGP010…	-0.02||-0.02||-0.02||-0.02||-0.02||-0.02||-0.02||-0.02||-0.02||-0.02||-0.02||-0.02||-0.02||-0.02||-0.02||-0.02||-0.02||-0.02||-0.02||-0.02||-0.02||-0.02||-0.02||-2.91||-2.91||-2.91||-2.91||-2.91||-2.91||-2.91||-2.91||-2.91||-2.91||-2.91||-2.91||-2.91||-2.91||-2.91
835.666	C47H93N2O6P||C47H93N2O6P	[M+Na]+||[M+Na]+	SM(d18:1/24:1(15Z))||SM(d18:2/24:0)	LMSP03010007||LMSP03010081	-0.71||-0.71
836.437	C41H67NO15	[M+Na]+	Troleandomycin	LMPK04000042	-3.83
836.517	C47H76NO8P||C47H76NO8P||C47H76NO8P||C47H76NO8P	[M+Na]+||[M+Na]+||[M+Na]+||[M+Na]+	PE(20:3(8Z,11Z,14Z)/22:6(4Z,7Z,10Z,13Z,16Z,19Z))||PE(20:5(5Z,8Z,11Z,14Z,17Z)/22:4(7Z,10Z,13Z,16Z))||PE(22:4(7Z,10Z,13Z,16Z)/20:5(5Z,8Z,11Z,14Z,17Z))||PE(22:6(4Z,7Z,10Z,13Z,16Z,19Z)/20:3(8Z,11Z,14Z))	LMGP02010932||LMGP02010990||LMGP02011126||LMGP02011153	-4.03||-4.03||-4.03||-4.03
836.615	C46H88NO8P||C46H88NO8P||C46H88NO8P||C46H88NO8P||C46H88NO8P||C46H88NO8P||C46H88NO8P||C46H88NO8P||C46H88NO8P||C46H88NO8P||C46H88NO8P||C46H88NO8P||C46H88NO8P||C46H88NO8P||C46H88NO8P||C46H88NO8P||C46H88NO8P||C46H88NO8P||C46H88NO8P||C46H88NO8P||C46H88NO8P||C46H88NO8P||C46H88NO8P||C46H88NO8P||C46H88NO8P||C48H86NO8P||C48H86NO8P||C48H86NO8P||C48H86NO8P||C48H86NO8P||C48H86NO8P||C48H86NO8P||C48H86NO8P||C48…	[M+Na]+||[M+Na]+||[M+Na]+||[M+Na]+||[M+Na]+||[M+Na]+||[M+Na]+||[M+Na]+||[M+Na]+||[M+Na]+||[M+Na]+||[M+Na]+||[M+Na]+||[M+Na]+||[M+Na]+||[M+Na]+||[M+Na]+||[M+Na]+||[M+Na]+||[M+Na]+||[M+Na]+||[M+Na]+||[M+Na]+||[M+Na]+||[M+Na]+||[M+H]+||[M+H]+||[M+H]+||[M+H]+||[M+H]+||[M+H]+||[M+H]+||[M+H]+||[M+H]+||[M+H]+||[M+H]+||[M+H]+||[M+H]+||[M+H]+||[M+H]+||[M+H]+||[M+H]+||[M+H]+||[M+H]+||[M+H]+||[M+H]+||[M+H]+…	PC(16:0/22:2(13Z,16Z))||PC(16:1(9Z)/22:1(11Z))||PC(17:2(9Z,12Z)/21:0)||PC(18:0/20:2(11Z,14Z))||PC(18:0/20:2(5Z,11Z))||PC(18:0/20:2(5Z,14Z))||PC(18:0/20:2(5Z,8Z))||PC(18:0/20:2(8Z,11Z))||PC(18:0/20:2(8Z,14Z))||PC(18:1(11Z)/20:1(13Z))||PC(18:1(9Z)/20:1(11Z))||PC(18:2(9Z,12Z)/20:0)||PC(19:1(9Z)/19:1(9Z))||PC(20:0/18:2(9Z,12Z))||PC(20:1(11Z)/18:1(9Z))||PC(20:2(11Z,14Z)/18:0)||PC(21:0/17:2(9Z,12Z))||P…	LMGP01011472||LMGP01011495||LMGP01011575||LMGP01010788||LMGP01010789||LMGP01010790||LMGP01010791||LMGP01010792||LMGP01010793||LMGP01010843||LMGP01011607||LMGP01011630||LMGP01011774||LMGP01011296||LMGP01011817||LMGP01011846||LMGP01011962||LMGP01012011||LMGP01012041||LMGP02010790||LMGP02010820||LMGP02010896||LMGP02011008||LMGP02011058||LMGP02011088||LMGP01010816||LMGP01010818||LMGP01012160||LMGP010…	1.09||1.09||1.09||1.09||1.09||1.09||1.09||1.09||1.09||1.09||1.09||1.09||1.09||1.09||1.09||1.09||1.09||1.09||1.09||1.09||1.09||1.09||1.09||1.09||1.09||-1.79||-1.79||-1.79||-1.79||-1.79||-1.79||-1.79||-1.79||-1.79||-1.79||-1.79||-1.79||-1.79||-1.79||-1.79||-1.79||-1.79||-1.79||-1.79||-1.79||-1.79||-1.79||-1.79||-1.79
837.542	C45H74NO10P||C45H74NO10P	[M+NH4]+||[M+NH4]+	PS(17:1(9Z)/22:6(4Z,7Z,10Z,13Z,16Z,19Z))||PS(22:6(4Z,7Z,10Z,13Z,16Z,19Z)/17:1(9Z))	LMGP03010277||LMGP03010825	3.7||3.7
837.672	C45H90NO9P||C45H90NO9P	[M+NH4]+||[M+NH4]+	PS(O-18:0/21:0)||PS(O-20:0/19:0)	LMGP03020037||LMGP03020057	3.73||3.73
837.681	C47H95N2O6P||C47H95N2O6P	[M+Na]+||[M+Na]+	SM(d18:0/24:1(15Z))||SM(d18:1/24:0)	LMSP03010023||LMSP03010008	-0.92||-0.92
838.533	C47H78NO8P||C47H78NO8P||C47H78NO8P||C47H78NO8P||C47H78NO8P||C47H78NO8P	[M+Na]+||[M+Na]+||[M+Na]+||[M+Na]+||[M+Na]+||[M+Na]+	PC(17:2(9Z,12Z)/22:6(4Z,7Z,10Z,13Z,16Z,19Z))||PC(22:6(4Z,7Z,10Z,13Z,16Z,19Z)/17:2(9Z,12Z))||PE(20:2(11Z,14Z)/22:6(4Z,7Z,10Z,13Z,16Z,19Z))||PE(20:4(5Z,8Z,11Z,14Z)/22:4(7Z,10Z,13Z,16Z))||PE(22:4(7Z,10Z,13Z,16Z)/20:4(5Z,8Z,11Z,14Z))||PE(22:6(4Z,7Z,10Z,13Z,16Z,19Z)/20:2(11Z,14Z))	LMGP01011580||LMGP01012106||LMGP02010901||LMGP02010960||LMGP02011125||LMGP02011152	-3.66||-3.66||-3.66||-3.66||-3.66||-3.66
838.631	C48H88NO8P||C48H88NO8P||C48H88NO8P||C48H88NO8P||C48H88NO8P||C48H88NO8P||C48H88NO8P||C48H88NO8P||C48H88NO8P||C48H88NO8P||C48H88NO8P||C48H88NO8P||C48H88NO8P||C48H88NO8P||C48H88NO8P||C48H88NO8P||C48H88NO8P||C48H88NO8P||C48H88NO8P||C48H88NO8P||C48H88NO8P||C48H88NO8P||C48H88NO8P||C48H88NO8P||C48H88NO8P||C48H88NO8P||C46H90NO8P||C46H90NO8P||C46H90NO8P||C46H90NO8P||C46H90NO8P||C46H90NO8P||C46H90NO8P||C46…	[M+H]+||[M+H]+||[M+H]+||[M+H]+||[M+H]+||[M+H]+||[M+H]+||[M+H]+||[M+H]+||[M+H]+||[M+H]+||[M+H]+||[M+H]+||[M+H]+||[M+H]+||[M+H]+||[M+H]+||[M+H]+||[M+H]+||[M+H]+||[M+H]+||[M+H]+||[M+H]+||[M+H]+||[M+H]+||[M+H]+||[M+Na]+||[M+Na]+||[M+Na]+||[M+Na]+||[M+Na]+||[M+Na]+||[M+Na]+||[M+Na]+||[M+Na]+||[M+Na]+||[M+Na]+||[M+Na]+||[M+Na]+||[M+Na]+||[M+Na]+||[M+Na]+||[M+Na]+||[M+Na]+||[M+Na]+||[M+Na]+||[M+Na]+||[M…	PC(18:0/22:4(7Z,10Z,13Z,16Z))||PC(18:2(9Z,12Z)/22:2(13Z,16Z))||PC(18:3(6Z,9Z,12Z)/22:1(11Z))||PC(18:3(6Z,9Z,12Z)/22:1(13Z))||PC(18:3(9Z,12Z,15Z)/22:1(11Z))||PC(18:3(9Z,12Z,15Z)/22:1(13Z))||PC(18:4(6Z,9Z,12Z,15Z)/22:0)||PC(20:0/20:4(5Z,8Z,11Z,14Z))||PC(20:0/20:4(8Z,11Z,14Z,17Z))||PC(20:1(11Z)/20:3(5Z,8Z,11Z))||PC(20:1(11Z)/20:3(8Z,11Z,14Z))||PC(20:2(11E,14E)/20:2(11E,14E))||PC(20:2(11Z,14Z)/20:2(1…	LMGP01010813||LMGP01011638||LMGP01011667||LMGP01012176||LMGP01011696||LMGP01012180||LMGP01011726||LMGP01011023||LMGP01012186||LMGP01012187||LMGP01011826||LMGP01011045||LMGP01011856||LMGP01012203||LMGP01011886||LMGP01011915||LMGP01012213||LMGP01011991||LMGP01012018||LMGP01012019||LMGP01012223||LMGP01012224||LMGP01012048||LMGP01012077||LMGP02011015||LMGP02011127||LMGP01010516||LMGP01011471||LMGP010…	-1.12||-1.12||-1.12||-1.12||-1.12||-1.12||-1.12||-1.12||-1.12||-1.12||-1.12||-1.12||-1.12||-1.12||-1.12||-1.12||-1.12||-1.12||-1.12||-1.12||-1.12||-1.12||-1.12||-1.12||-1.12||-1.12||1.75||1.75||1.75||1.75||1.75||1.75||1.75||1.75||1.75||1.75||1.75||1.75||1.75||1.75||1.75||1.75||1.75||1.75||1.75||1.75||1.75||1.75||1.75||1.75||1.75||1.75||1.75||1.75
839.486	C46H73O10P||C46H73O10P||C46H73O10P||C46H73O10P||C46H73O10P||C46H73O10P	[M+Na]+||[M+Na]+||[M+Na]+||[M+Na]+||[M+Na]+||[M+Na]+	PG(18:3(6Z,9Z,12Z)/22:6(4Z,7Z,10Z,13Z,16Z,19Z))||PG(18:3(9Z,12Z,15Z)/22:6(4Z,7Z,10Z,13Z,16Z,19Z))||PG(20:4(5Z,8Z,11Z,14Z)/20:5(5Z,8Z,11Z,14Z,17Z))||PG(20:5(5Z,8Z,11Z,14Z,17Z)/20:4(5Z,8Z,11Z,14Z))||PG(22:6(4Z,7Z,10Z,13Z,16Z,19Z)/18:3(6Z,9Z,12Z))||PG(22:6(4Z,7Z,10Z,13Z,16Z,19Z)/18:3(9Z,12Z,15Z))	LMGP04010396||LMGP04010424||LMGP04010642||LMGP04010670||LMGP04010830||LMGP04010831	2.59||2.59||2.59||2.59||2.59||2.59
840.647	C48H90NO8P||C48H90NO8P||C48H90NO8P||C48H90NO8P||C48H90NO8P||C48H90NO8P||C48H90NO8P||C48H90NO8P||C48H90NO8P||C48H90NO8P||C48H90NO8P||C48H90NO8P||C48H90NO8P||C48H90NO8P||C48H90NO8P||C48H90NO8P||C48H90NO8P||C48H90NO8P||C48H90NO8P||C48H90NO8P||C46H92NO8P||C46H92NO8P||C46H92NO8P||C46H92NO8P||C46H92NO8P||C46H92NO8P||C46H92NO8P||C46H92NO8P||C46H92NO8P||C46H92NO8P||C46H92NO8P||C46H92NO8P||C46H92NO8P||C46…	[M+H]+||[M+H]+||[M+H]+||[M+H]+||[M+H]+||[M+H]+||[M+H]+||[M+H]+||[M+H]+||[M+H]+||[M+H]+||[M+H]+||[M+H]+||[M+H]+||[M+H]+||[M+H]+||[M+H]+||[M+H]+||[M+H]+||[M+H]+||[M+Na]+||[M+Na]+||[M+Na]+||[M+Na]+||[M+Na]+||[M+Na]+||[M+Na]+||[M+Na]+||[M+Na]+||[M+Na]+||[M+Na]+||[M+Na]+||[M+Na]+||[M+Na]+||[M+Na]+	PC(18:0/22:3(10Z,13Z,16Z))||PC(18:1(11Z)/22:2(13Z,16Z))||PC(18:1(9Z)/22:2(13Z,16Z))||PC(18:2(9Z,12Z)/22:1(11Z))||PC(18:2(9Z,12Z)/22:1(13Z))||PC(18:3(6Z,9Z,12Z)/22:0)||PC(18:3(9Z,12Z,15Z)/22:0)||PC(20:0/20:3(11Z,14Z,17Z))||PC(20:0/20:3(5Z,8Z,11Z))||PC(20:0/20:3(8Z,11Z,14Z))||PC(20:1(11Z)/20:2(11Z,14Z))||PC(20:2(11Z,14Z)/20:1(11Z))||PC(20:3(5Z,8Z,11Z)/20:0)||PC(20:3(8Z,11Z,14Z)/20:0)||PC(22:0/18:3(…	LMGP01010812||LMGP01012159||LMGP01011612||LMGP01011637||LMGP01012172||LMGP01011666||LMGP01011695||LMGP01011022||LMGP01012185||LMGP01011799||LMGP01011825||LMGP01011855||LMGP01012202||LMGP01011885||LMGP01011989||LMGP01011990||LMGP01012017||LMGP01012222||LMGP01012230||LMGP01012047||LMGP01010452||LMGP01010470||LMGP01010515||LMGP01010636||LMGP01011516||LMGP01010781||LMGP01010976||LMGP01011004||LMGP010…	-0.87||-0.87||-0.87||-0.87||-0.87||-0.87||-0.87||-0.87||-0.87||-0.87||-0.87||-0.87||-0.87||-0.87||-0.87||-0.87||-0.87||-0.87||-0.87||-0.87||1.99||1.99||1.99||1.99||1.99||1.99||1.99||1.99||1.99||1.99||1.99||1.99||1.99||1.99||1.99
841.51	C45H76O12S	[M+H]+	SQDG(22:5(5Z,8Z,11Z,14Z,17Z)/16:1(13Z))	LMGL05010009	-3.82
843.663	C47H88NO8P||C47H88NO8P||C47H88NO8P||C47H88NO8P||C47H88NO8P||C47H88NO8P||C47H88NO8P||C47H88NO8P||C47H88NO8P||C47H88NO8P||C47H88NO8P||C47H88NO8P||C47H88NO8P||C47H88NO8P||C47H88NO8P||C47H88NO8P||C47H88NO8P||C47H88NO8P	[M+NH4]+||[M+NH4]+||[M+NH4]+||[M+NH4]+||[M+NH4]+||[M+NH4]+||[M+NH4]+||[M+NH4]+||[M+NH4]+||[M+NH4]+||[M+NH4]+||[M+NH4]+||[M+NH4]+||[M+NH4]+||[M+NH4]+||[M+NH4]+||[M+NH4]+||[M+NH4]+	PC(17:1(9Z)/22:2(13Z,16Z))||PC(17:2(9Z,12Z)/22:1(11Z))||PC(18:3(6Z,9Z,12Z)/21:0)||PC(18:3(9Z,12Z,15Z)/21:0)||PC(19:0/20:3(8Z,11Z,14Z))||PC(19:1(9Z)/20:2(11Z,14Z))||PC(20:2(11Z,14Z)/19:1(9Z))||PC(20:3(8Z,11Z,14Z)/19:0)||PC(21:0/18:3(6Z,9Z,12Z))||PC(21:0/18:3(9Z,12Z,15Z))||PC(22:1(11Z)/17:2(9Z,12Z))||PC(22:2(13Z,16Z)/17:1(9Z))||PE(20:1(11Z)/22:2(13Z,16Z))||PE(20:2(11Z,14Z)/22:1(11Z))||PE(20:3(8Z,11…	LMGP01011548||LMGP01011577||LMGP01011665||LMGP01011694||LMGP01011747||LMGP01011777||LMGP01011853||LMGP01011883||LMGP01011965||LMGP01011966||LMGP01012014||LMGP01012044||LMGP02010868||LMGP02010898||LMGP02010928||LMGP02011032||LMGP02011061||LMGP02011091	4.96||4.96||4.96||4.96||4.96||4.96||4.96||4.96||4.96||4.96||4.96||4.96||4.96||4.96||4.96||4.96||4.96||4.96
845.528	C46H79O10P||C46H79O10P||C46H79O10P||C46H79O10P||C46H79O10P||C46H79O10P||C46H79O10P||C46H79O10P||C46H79O10P||C46H79O10P||C46H79O10P	[M+Na]+||[M+Na]+||[M+Na]+||[M+Na]+||[M+Na]+||[M+Na]+||[M+Na]+||[M+Na]+||[M+Na]+||[M+Na]+||[M+Na]+	PG(18:0/22:6(4Z,7Z,10Z,13Z,16Z,19Z))||PG(18:2(9Z,12Z)/22:4(7Z,10Z,13Z,16Z))||PG(18:4(6Z,9Z,12Z,15Z)/22:2(13Z,16Z))||PG(20:1(11Z)/20:5(5Z,8Z,11Z,14Z,17Z))||PG(20:2(11Z,14Z)/20:4(5Z,8Z,11Z,14Z))||PG(20:3(8Z,11Z,14Z)/20:3(8Z,11Z,14Z))||PG(20:4(5Z,8Z,11Z,14Z)/20:2(11Z,14Z))||PG(20:5(5Z,8Z,11Z,14Z,17Z)/20:1(11Z))||PG(22:2(13Z,16Z)/18:4(6Z,9Z,12Z,15Z))||PG(22:4(7Z,10Z,13Z,16Z)/18:2(9Z,12Z))||PG(22:6(4Z…	LMGP04010040||LMGP04010365||LMGP04010453||LMGP04010551||LMGP04010581||LMGP04010611||LMGP04010640||LMGP04010667||LMGP04010772||LMGP04010800||LMGP04010827	-2.27||-2.27||-2.27||-2.27||-2.27||-2.27||-2.27||-2.27||-2.27||-2.27||-2.27
846.541	C42H81NO12S	[M+Na]+	(3-sulfo)Galbeta-Cer(d18:1/18:0(2OH))	LMSP06020004	4.09
847.544	C46H81O10P||C46H81O10P||C46H81O10P||C46H81O10P||C46H81O10P||C46H81O10P||C46H81O10P||C46H81O10P||C46H81O10P||C46H81O10P||C46H81O10P||C46H81O10P||C46H81O10P||C46H81O10P	[M+Na]+||[M+Na]+||[M+Na]+||[M+Na]+||[M+Na]+||[M+Na]+||[M+Na]+||[M+Na]+||[M+Na]+||[M+Na]+||[M+Na]+||[M+Na]+||[M+Na]+||[M+Na]+	PG(18:1(9Z)/22:4(7Z,10Z,13Z,16Z))||PG(18:3(6Z,9Z,12Z)/22:2(13Z,16Z))||PG(18:3(9Z,12Z,15Z)/22:2(13Z,16Z))||PG(18:4(6Z,9Z,12Z,15Z)/22:1(11Z))||PG(20:0/20:5(5Z,8Z,11Z,14Z,17Z))||PG(20:1(11Z)/20:4(5Z,8Z,11Z,14Z))||PG(20:2(11Z,14Z)/20:3(8Z,11Z,14Z))||PG(20:3(8Z,11Z,14Z)/20:2(11Z,14Z))||PG(20:4(5Z,8Z,11Z,14Z)/20:1(11Z))||PG(20:5(5Z,8Z,11Z,14Z,17Z)/20:0)||PG(22:1(11Z)/18:4(6Z,9Z,12Z,15Z))||PG(22:2(13Z,1…	LMGP04010339||LMGP04010394||LMGP04010422||LMGP04010452||LMGP04010523||LMGP04010550||LMGP04010580||LMGP04010610||LMGP04010639||LMGP04010666||LMGP04010741||LMGP04010770||LMGP04010771||LMGP04010799	-2.27||-2.27||-2.27||-2.27||-2.27||-2.27||-2.27||-2.27||-2.27||-2.27||-2.27||-2.27||-2.27||-2.27
848.539	C45H80NO10P||C45H80NO10P||C45H80NO10P||C45H80NO10P||C45H80NO10P||C45H80NO10P||C45H80NO10P||C45H80NO10P||C45H80NO10P||C45H80NO10P	[M+Na]+||[M+Na]+||[M+Na]+||[M+Na]+||[M+Na]+||[M+Na]+||[M+Na]+||[M+Na]+||[M+Na]+||[M+Na]+	PS(17:0/22:4(7Z,10Z,13Z,16Z))||PS(17:2(9Z,12Z)/22:2(13Z,16Z))||PS(18:4(6Z,9Z,12Z,15Z)/21:0)||PS(19:0/20:4(5Z,8Z,11Z,14Z))||PS(19:1(9Z)/20:3(8Z,11Z,14Z))||PS(20:3(8Z,11Z,14Z)/19:1(9Z))||PS(20:4(5Z,8Z,11Z,14Z)/19:0)||PS(21:0/18:4(6Z,9Z,12Z,15Z))||PS(22:2(13Z,16Z)/17:2(9Z,12Z))||PS(22:4(7Z,10Z,13Z,16Z)/17:0)	LMGP03010247||LMGP03010305||LMGP03010450||LMGP03010472||LMGP03010502||LMGP03010607||LMGP03010636||LMGP03010689||LMGP03010766||LMGP03010795	-2.35||-2.35||-2.35||-2.35||-2.35||-2.35||-2.35||-2.35||-2.35||-2.35
848.614	C47H88NO8P||C47H88NO8P||C47H88NO8P||C47H88NO8P||C47H88NO8P||C47H88NO8P||C47H88NO8P||C47H88NO8P||C47H88NO8P||C47H88NO8P||C47H88NO8P||C47H88NO8P||C47H88NO8P||C47H88NO8P||C47H88NO8P||C47H88NO8P||C47H88NO8P||C47H88NO8P||C49H86NO8P||C49H86NO8P||C49H86NO8P||C49H86NO8P||C49H86NO8P||C49H86NO8P	[M+Na]+||[M+Na]+||[M+Na]+||[M+Na]+||[M+Na]+||[M+Na]+||[M+Na]+||[M+Na]+||[M+Na]+||[M+Na]+||[M+Na]+||[M+Na]+||[M+Na]+||[M+Na]+||[M+Na]+||[M+Na]+||[M+Na]+||[M+Na]+||[M+H]+||[M+H]+||[M+H]+||[M+H]+||[M+H]+||[M+H]+	PC(17:1(9Z)/22:2(13Z,16Z))||PC(17:2(9Z,12Z)/22:1(11Z))||PC(18:3(6Z,9Z,12Z)/21:0)||PC(18:3(9Z,12Z,15Z)/21:0)||PC(19:0/20:3(8Z,11Z,14Z))||PC(19:1(9Z)/20:2(11Z,14Z))||PC(20:2(11Z,14Z)/19:1(9Z))||PC(20:3(8Z,11Z,14Z)/19:0)||PC(21:0/18:3(6Z,9Z,12Z))||PC(21:0/18:3(9Z,12Z,15Z))||PC(22:1(11Z)/17:2(9Z,12Z))||PC(22:2(13Z,16Z)/17:1(9Z))||PE(20:1(11Z)/22:2(13Z,16Z))||PE(20:2(11Z,14Z)/22:1(11Z))||PE(20:3(8Z,11…	LMGP01011548||LMGP01011577||LMGP01011665||LMGP01011694||LMGP01011747||LMGP01011777||LMGP01011853||LMGP01011883||LMGP01011965||LMGP01011966||LMGP01012014||LMGP01012044||LMGP02010868||LMGP02010898||LMGP02010928||LMGP02011032||LMGP02011061||LMGP02011091||LMGP01011755||LMGP01012113||LMGP02011039||LMGP02011100||LMGP02011130||LMGP02011157	0.34||0.34||0.34||0.34||0.34||0.34||0.34||0.34||0.34||0.34||0.34||0.34||0.34||0.34||0.34||0.34||0.34||0.34||-2.49||-2.49||-2.49||-2.49||-2.49||-2.49
849.559	C46H83O10P||C46H83O10P||C46H83O10P||C46H83O10P||C46H83O10P||C46H83O10P||C46H83O10P||C46H83O10P||C46H83O10P||C46H83O10P||C46H83O10P||C46H83O10P||C46H83O10P||C46H83O10P||C46H83O10P	[M+Na]+||[M+Na]+||[M+Na]+||[M+Na]+||[M+Na]+||[M+Na]+||[M+Na]+||[M+Na]+||[M+Na]+||[M+Na]+||[M+Na]+||[M+Na]+||[M+Na]+||[M+Na]+||[M+Na]+	PG(18:0/22:4(7Z,10Z,13Z,16Z))||PG(18:2(9Z,12Z)/22:2(13Z,16Z))||PG(18:3(6Z,9Z,12Z)/22:1(11Z))||PG(18:3(9Z,12Z,15Z)/22:1(11Z))||PG(18:4(6Z,9Z,12Z,15Z)/22:0)||PG(20:0/20:4(5Z,8Z,11Z,14Z))||PG(20:1(11Z)/20:3(8Z,11Z,14Z))||PG(20:2(11Z,14Z)/20:2(11Z,14Z))||PG(20:3(8Z,11Z,14Z)/20:1(11Z))||PG(20:4(5Z,8Z,11Z,14Z)/20:0)||PG(22:0/18:4(6Z,9Z,12Z,15Z))||PG(22:1(11Z)/18:3(6Z,9Z,12Z))||PG(22:1(11Z)/18:3(9Z,12Z,…	LMGP04010883||LMGP04010364||LMGP04010393||LMGP04010421||LMGP04010451||LMGP04010862||LMGP04010549||LMGP04010579||LMGP04010609||LMGP04010638||LMGP04010713||LMGP04010739||LMGP04010740||LMGP04010769||LMGP04010798	-2.88||-2.88||-2.88||-2.88||-2.88||-2.88||-2.88||-2.88||-2.88||-2.88||-2.88||-2.88||-2.88||-2.88||-2.88
850.627	C47H90NO8P||C47H90NO8P||C47H90NO8P||C47H90NO8P||C47H90NO8P||C47H90NO8P||C47H90NO8P||C47H90NO8P||C47H90NO8P||C47H90NO8P||C47H90NO8P||C47H90NO8P||C47H90NO8P||C47H90NO8P||C47H90NO8P||C47H90NO8P||C47H90NO8P||C47H90NO8P	[M+Na]+||[M+Na]+||[M+Na]+||[M+Na]+||[M+Na]+||[M+Na]+||[M+Na]+||[M+Na]+||[M+Na]+||[M+Na]+||[M+Na]+||[M+Na]+||[M+Na]+||[M+Na]+||[M+Na]+||[M+Na]+||[M+Na]+||[M+Na]+	PC(17:0/22:2(13Z,16Z))||PC(17:1(9Z)/22:1(11Z))||PC(17:2(9Z,12Z)/22:0)||PC(18:2(9Z,12Z)/21:0)||PC(19:0/20:2(11Z,14Z))||PC(19:1(9Z)/20:1(11Z))||PC(20:1(11Z)/19:1(9Z))||PC(20:2(11Z,14Z)/19:0)||PC(21:0/18:2(9Z,12Z))||PC(22:0/17:2(9Z,12Z))||PC(22:1(11Z)/17:1(9Z))||PC(22:2(13Z,16Z)/17:0)||PE(20:0/22:2(13Z,16Z))||PE(20:1(11Z)/22:1(11Z))||PE(20:2(11Z,14Z)/22:0)||PE(22:0/20:2(11Z,14Z))||PE(22:1(11Z)/20:1(…	LMGP01011519||LMGP01011547||LMGP01011576||LMGP01011635||LMGP01011746||LMGP01011776||LMGP01011823||LMGP01011852||LMGP01011964||LMGP01011987||LMGP01012013||LMGP01012043||LMGP02010839||LMGP02010867||LMGP02010897||LMGP02011031||LMGP02011060||LMGP02011090	-2.87||-2.87||-2.87||-2.87||-2.87||-2.87||-2.87||-2.87||-2.87||-2.87||-2.87||-2.87||-2.87||-2.87||-2.87||-2.87||-2.87||-2.87
851.575	C46H85O10P||C46H85O10P||C46H85O10P||C46H85O10P||C46H85O10P||C46H85O10P||C46H85O10P||C46H85O10P||C46H85O10P||C46H85O10P||C46H85O10P||C46H85O10P	[M+Na]+||[M+Na]+||[M+Na]+||[M+Na]+||[M+Na]+||[M+Na]+||[M+Na]+||[M+Na]+||[M+Na]+||[M+Na]+||[M+Na]+||[M+Na]+	PG(18:1(9Z)/22:2(13Z,16Z))||PG(18:2(9Z,12Z)/22:1(11Z))||PG(18:3(6Z,9Z,12Z)/22:0)||PG(18:3(9Z,12Z,15Z)/22:0)||PG(20:0/20:3(8Z,11Z,14Z))||PG(20:1(11Z)/20:2(11Z,14Z))||PG(20:2(11Z,14Z)/20:1(11Z))||PG(20:3(8Z,11Z,14Z)/20:0)||PG(22:0/18:3(6Z,9Z,12Z))||PG(22:0/18:3(9Z,12Z,15Z))||PG(22:1(11Z)/18:2(9Z,12Z))||PG(22:2(13Z,16Z)/18:1(9Z))	LMGP04010338||LMGP04010363||LMGP04010392||LMGP04010420||LMGP04010522||LMGP04010548||LMGP04010578||LMGP04010608||LMGP04010711||LMGP04010712||LMGP04010738||LMGP04010768	-2.49||-2.49||-2.49||-2.49||-2.49||-2.49||-2.49||-2.49||-2.49||-2.49||-2.49||-2.49
851.709	C53H96O6||C53H96O6||C53H96O6||C53H96O6||C53H96O6||C53H96O6||C53H96O6||C53H96O6||C53H96O6||C53H96O6||C53H96O6||C53H96O6||C53H96O6||C53H96O6||C53H96O6||C53H96O6||C53H96O6||C53H96O6||C53H96O6||C53H96O6||C53H96O6||C53H96O6||C53H96O6||C53H96O6||C53H96O6||C53H96O6||C53H96O6||C53H96O6||C53H96O6||C53H96O6||C53H96O6||C53H96O6||C53H96O6||C53H96O6||C53H96O6||C53H96O6||C53H96O6||C53H96O6||C53H96O6||C53H96O6|…	[M+Na]+||[M+Na]+||[M+Na]+||[M+Na]+||[M+Na]+||[M+Na]+||[M+Na]+||[M+Na]+||[M+Na]+||[M+Na]+||[M+Na]+||[M+Na]+||[M+Na]+||[M+Na]+||[M+Na]+||[M+Na]+||[M+Na]+||[M+Na]+||[M+Na]+||[M+Na]+||[M+Na]+||[M+Na]+||[M+Na]+||[M+Na]+||[M+Na]+||[M+Na]+||[M+Na]+||[M+Na]+||[M+Na]+||[M+Na]+||[M+Na]+||[M+Na]+||[M+Na]+||[M+Na]+||[M+Na]+||[M+Na]+||[M+Na]+||[M+Na]+||[M+Na]+||[M+Na]+||[M+Na]+||[M+Na]+||[M+Na]+||[M+Na]+||[M+…	TG(12:0/16:0/22:3(10Z,13Z,16Z))[iso6]||TG(12:0/16:1(9Z)/22:2(13Z,16Z))[iso6]||TG(12:0/18:0/20:3(8Z,11Z,14Z))[iso6]||TG(12:0/18:1(9Z)/20:2(11Z,14Z))[iso6]||TG(12:0/18:2(9Z,12Z)/20:1(11Z))[iso6]||TG(12:0/18:3(6Z,9Z,12Z)/20:0)[iso6]||TG(12:0/18:3(9Z,12Z,15Z)/20:0)[iso6]||TG(13:0/15:0/22:3(10Z,13Z,16Z))[iso6]||TG(13:0/15:1(9Z)/22:2(13Z,16Z))[iso6]||TG(13:0/17:0/20:3(8Z,11Z,14Z))[iso6]||TG(13:0/17:1(9…	LMGL03013343||LMGL03013367||LMGL03013451||LMGL03013470||LMGL03013488||LMGL03013505||LMGL03013522||LMGL03013755||LMGL03013781||LMGL03013850||LMGL03013872||LMGL03013893||LMGL03013951||LMGL03013968||LMGL03013985||LMGL03012779||LMGL03014161||LMGL03014236||LMGL03014260||LMGL03014326||LMGL03014343||LMGL03014344||LMGL03014362||LMGL03012836||LMGL03014641||LMGL03014665||LMGL03014710||LMGL03014731||LMGL030…	-1.13||-1.13||-1.13||-1.13||-1.13||-1.13||-1.13||-1.13||-1.13||-1.13||-1.13||-1.13||-1.13||-1.13||-1.13||-1.13||-1.13||-1.13||-1.13||-1.13||-1.13||-1.13||-1.13||-1.13||-1.13||-1.13||-1.13||-1.13||-1.13||-1.13||-1.13||-1.13||-1.13||-1.13||-1.13||-1.13||-1.13||-1.13||-1.13||-1.13||-1.13||-1.13||-1.13||-1.13||-1.13||-1.13||-1.13||-1.13||-3.96||-3.96||-3.96||-3.96||-3.96||-3.96||-3.96||-3.96||-3.96||…
854.566	C48H82NO8P||C48H82NO8P||C48H82NO8P||C48H82NO8P||C48H82NO8P||C48H82NO8P||C48H82NO8P||C48H82NO8P||C48H82NO8P||C48H82NO8P||C48H82NO8P||C48H82NO8P||C50H80NO8P||C50H80NO8P||C50H80NO8P	[M+Na]+||[M+Na]+||[M+Na]+||[M+Na]+||[M+Na]+||[M+Na]+||[M+Na]+||[M+Na]+||[M+Na]+||[M+Na]+||[M+Na]+||[M+Na]+||[M+H]+||[M+H]+||[M+H]+	PC(18:1(11Z)/22:6(4Z,7Z,10Z,13Z,16Z,19Z))||PC(18:1(9Z)/22:6(4Z,7Z,10Z,13Z,16Z,19Z))||PC(18:2(9Z,12Z)/22:5(4Z,7Z,10Z,13Z,16Z))||PC(18:3(6Z,9Z,12Z)/22:4(7Z,10Z,13Z,16Z))||PC(18:3(9Z,12Z,15Z)/22:4(7Z,10Z,13Z,16Z))||PC(20:2(11Z,14Z)/20:5(5Z,8Z,11Z,14Z,17Z))||PC(20:3(8Z,11Z,14Z)/20:4(5Z,8Z,11Z,14Z))||PC(20:4(5Z,8Z,11Z,14Z)/20:3(8Z,11Z,14Z))||PC(20:5(5Z,8Z,11Z,14Z,17Z)/20:2(11Z,14Z))||PC(22:4(7Z,10Z,13…	LMGP01010847||LMGP01010913||LMGP01010946||LMGP01011669||LMGP01011698||LMGP01011859||LMGP01011889||LMGP01011918||LMGP01011946||LMGP01012080||LMGP01012081||LMGP01012108||LMGP01011925||LMGP01011058||LMGP01012119	-0.81||-0.81||-0.81||-0.81||-0.81||-0.81||-0.81||-0.81||-0.81||-0.81||-0.81||-0.81||-3.63||-3.63||-3.63
856.507	C46H76NO10P||C46H76NO10P||C46H76NO10P||C46H76NO10P||C46H76NO10P||C46H76NO10P||C46H76NO10P||C46H76NO10P||C46H76NO10P||C46H76NO10P	[M+Na]+||[M+Na]+||[M+Na]+||[M+Na]+||[M+Na]+||[M+Na]+||[M+Na]+||[M+Na]+||[M+Na]+||[M+Na]+	PS(18:1(9Z)/22:6(4Z,7Z,10Z,13Z,16Z,19Z))||PS(18:3(6Z,9Z,12Z)/22:4(7Z,10Z,13Z,16Z))||PS(18:3(9Z,12Z,15Z)/22:4(7Z,10Z,13Z,16Z))||PS(20:2(11Z,14Z)/20:5(5Z,8Z,11Z,14Z,17Z))||PS(20:3(8Z,11Z,14Z)/20:4(5Z,8Z,11Z,14Z))||PS(20:4(5Z,8Z,11Z,14Z)/20:3(8Z,11Z,14Z))||PS(20:5(5Z,8Z,11Z,14Z,17Z)/20:2(11Z,14Z))||PS(22:4(7Z,10Z,13Z,16Z)/18:3(6Z,9Z,12Z))||PS(22:4(7Z,10Z,13Z,16Z)/18:3(9Z,12Z,15Z))||PS(22:6(4Z,7Z,10Z…	LMGP03010045||LMGP03010395||LMGP03010423||LMGP03010582||LMGP03010612||LMGP03010641||LMGP03010668||LMGP03010801||LMGP03010802||LMGP03010828	-3.62||-3.62||-3.62||-3.62||-3.62||-3.62||-3.62||-3.62||-3.62||-3.62
856.582	C48H84NO8P||C48H84NO8P||C48H84NO8P||C48H84NO8P||C48H84NO8P||C48H84NO8P||C48H84NO8P||C48H84NO8P||C48H84NO8P||C48H84NO8P||C48H84NO8P||C48H84NO8P||C48H84NO8P||C48H84NO8P||C48H84NO8P||C50H82NO8P||C50H82NO8P||C50H82NO8P||C50H82NO8P	[M+Na]+||[M+Na]+||[M+Na]+||[M+Na]+||[M+Na]+||[M+Na]+||[M+Na]+||[M+Na]+||[M+Na]+||[M+Na]+||[M+Na]+||[M+Na]+||[M+Na]+||[M+Na]+||[M+Na]+||[M+H]+||[M+H]+||[M+H]+||[M+H]+	PC(18:0/22:6(4Z,7Z,10Z,13Z,16Z,19Z))||PC(18:0/22:6(9Z,11Z,13Z,15Z,17Z,19))||PC(18:1(11Z)/22:5(7Z,10Z,13Z,16Z,19Z))||PC(18:2(9Z,12Z)/22:4(7Z,10Z,13Z,16Z))||PC(18:4(6Z,9Z,12Z,15Z)/22:2(13Z,16Z))||PC(20:1(11Z)/20:5(5Z,8Z,11Z,14Z,17Z))||PC(20:2(11Z,14Z)/20:4(5Z,8Z,11Z,14Z))||PC(20:3(8Z,11Z,14Z)/20:3(8Z,11Z,14Z))||PC(20:4(5Z,8Z,11Z,14Z)/20:2(11Z,14Z))||PC(20:5(5Z,8Z,11Z,14Z,17Z)/20:1(11Z))||PC(22:2(13…	LMGP01010821||LMGP01010823||LMGP01010846||LMGP01011639||LMGP01011728||LMGP01011828||LMGP01011858||LMGP01011888||LMGP01011917||LMGP01011945||LMGP01012051||LMGP01012079||LMGP01012107||LMGP02010004||LMGP02011156||LMGP01011896||LMGP01011954||LMGP01012090||LMGP01012118	-1.02||-1.02||-1.02||-1.02||-1.02||-1.02||-1.02||-1.02||-1.02||-1.02||-1.02||-1.02||-1.02||-1.02||-1.02||-3.83||-3.83||-3.83||-3.83
858.598	C48H86NO8P||C48H86NO8P||C48H86NO8P||C48H86NO8P||C48H86NO8P||C48H86NO8P||C48H86NO8P||C48H86NO8P||C48H86NO8P||C48H86NO8P||C48H86NO8P||C48H86NO8P||C48H86NO8P||C48H86NO8P||C48H86NO8P||C48H86NO8P||C48H86NO8P||C48H86NO8P||C48H86NO8P||C48H86NO8P||C48H86NO8P||C48H86NO8P||C48H86NO8P||C48H86NO8P||C50H84NO8P||C50H84NO8P||C50H84NO8P||C50H84NO8P	[M+Na]+||[M+Na]+||[M+Na]+||[M+Na]+||[M+Na]+||[M+Na]+||[M+Na]+||[M+Na]+||[M+Na]+||[M+Na]+||[M+Na]+||[M+Na]+||[M+Na]+||[M+Na]+||[M+Na]+||[M+Na]+||[M+Na]+||[M+Na]+||[M+Na]+||[M+Na]+||[M+Na]+||[M+Na]+||[M+Na]+||[M+Na]+||[M+H]+||[M+H]+||[M+H]+||[M+H]+	PC(18:0/22:5(4Z,7Z,10Z,13Z,16Z))||PC(18:0/22:5(7Z,10Z,13Z,16Z,19Z))||PC(18:1(11Z)/22:4(7Z,10Z,13Z,16Z))||PC(18:1(9Z)/22:4(7Z,10Z,13Z,16Z))||PC(18:3(6Z,9Z,12Z)/22:2(13Z,16Z))||PC(18:3(9Z,12Z,15Z)/22:2(13Z,16Z))||PC(18:4(6Z,9Z,12Z,15Z)/22:1(11Z))||PC(18:4(6Z,9Z,12Z,15Z)/22:1(13Z))||PC(20:0/20:5(5Z,8Z,11Z,14Z,17Z))||PC(20:1(11Z)/20:4(5Z,8Z,11Z,14Z))||PC(20:1(11Z)/20:4(8Z,11Z,14Z,17Z))||PC(20:2(11Z,1…	LMGP01010816||LMGP01010818||LMGP01012160||LMGP01011613||LMGP01011668||LMGP01011697||LMGP01011727||LMGP01012183||LMGP01011800||LMGP01011827||LMGP01012188||LMGP01012191||LMGP01011857||LMGP01012204||LMGP01011887||LMGP01011916||LMGP01012214||LMGP01011944||LMGP01012020||LMGP01012225||LMGP01012049||LMGP01012050||LMGP01012231||LMGP01012078||LMGP01011865||LMGP01011924||LMGP01012089||LMGP01012117	-0.71||-0.71||-0.71||-0.71||-0.71||-0.71||-0.71||-0.71||-0.71||-0.71||-0.71||-0.71||-0.71||-0.71||-0.71||-0.71||-0.71||-0.71||-0.71||-0.71||-0.71||-0.71||-0.71||-0.71||-3.51||-3.51||-3.51||-3.51
859.529	C43H81O13P||C43H81O13P||C43H81O13P||C43H81O13P||C43H81O13P||C43H81O13P||C43H81O13P||C43H81O13P||C43H81O13P||C43H81O13P||C43H81O13P||C43H81O13P||C43H81O13P||C43H81O13P||C43H81O13P||C43H81O13P||C45H79O13P||C45H79O13P||C45H79O13P||C45H79O13P||C45H79O13P||C45H79O13P||C45H79O13P||C45H79O13P||C45H79O13P||C45H79O13P||C45H79O13P||C45H79O13P||C45H79O13P	[M+Na]+||[M+Na]+||[M+Na]+||[M+Na]+||[M+Na]+||[M+Na]+||[M+Na]+||[M+Na]+||[M+Na]+||[M+Na]+||[M+Na]+||[M+Na]+||[M+Na]+||[M+Na]+||[M+Na]+||[M+Na]+||[M+H]+||[M+H]+||[M+H]+||[M+H]+||[M+H]+||[M+H]+||[M+H]+||[M+H]+||[M+H]+||[M+H]+||[M+H]+||[M+H]+||[M+H]+	PI(12:0/22:1(11Z))||PI(14:0/20:1(11Z))||PI(14:1(9Z)/20:0)||PI(15:0/19:1(9Z))||PI(15:1(9Z)/19:0)||PI(16:0/18:1(9Z))||PI(16:1(9Z)/18:0)||PI(17:0/17:1(9Z))||PI(17:1(9Z)/17:0)||PI(18:0/16:1(9Z))||PI(18:1(9Z)/16:0)||PI(19:0/15:1(9Z))||PI(19:1(9Z)/15:0)||PI(20:0/14:1(9Z))||PI(20:1(11Z)/14:0)||PI(22:1(11Z)/12:0)||PI(14:0/22:4(7Z,10Z,13Z,16Z))||PI(16:0/20:4(5Z,8Z,11Z,14Z))||PI(16:1(9Z)/20:3(8Z,11Z,14Z))|…	LMGP06010033||LMGP06010070||LMGP06010095||LMGP06010117||LMGP06010146||LMGP06010001||LMGP06010179||LMGP06010199||LMGP06010224||LMGP06010857||LMGP06010933||LMGP06010425||LMGP06010452||LMGP06010479||LMGP06010498||LMGP06010694||LMGP06010076||LMGP06010958||LMGP06010187||LMGP06010856||LMGP06010298||LMGP06010850||LMGP06010927||LMGP06010346||LMGP06010843||LMGP06010404||LMGP06010564||LMGP06010828||LMGP060…	-1.68||-1.68||-1.68||-1.68||-1.68||-1.68||-1.68||-1.68||-1.68||-1.68||-1.68||-1.68||-1.68||-1.68||-1.68||-1.68||-4.48||-4.48||-4.48||-4.48||-4.48||-4.48||-4.48||-4.48||-4.48||-4.48||-4.48||-4.48||-4.48
859.601	C42H84NO13P||C42H84NO13P	[M+NH4]+||[M+NH4]+	PI-Cer(t18:0/18:0(2OH))||PI-Cer(t20:0/16:0(2OH))	LMSP03030037||LMSP03030042	-0.97||-0.97
860.614	C48H88NO8P||C48H88NO8P||C48H88NO8P||C48H88NO8P||C48H88NO8P||C48H88NO8P||C48H88NO8P||C48H88NO8P||C48H88NO8P||C48H88NO8P||C48H88NO8P||C48H88NO8P||C48H88NO8P||C48H88NO8P||C48H88NO8P||C48H88NO8P||C48H88NO8P||C48H88NO8P||C48H88NO8P||C48H88NO8P||C48H88NO8P||C48H88NO8P||C48H88NO8P||C48H88NO8P||C48H88NO8P||C48H88NO8P||C50H86NO8P||C50H86NO8P||C50H86NO8P||C50H86NO8P||C50H86NO8P||C50H86NO8P	[M+Na]+||[M+Na]+||[M+Na]+||[M+Na]+||[M+Na]+||[M+Na]+||[M+Na]+||[M+Na]+||[M+Na]+||[M+Na]+||[M+Na]+||[M+Na]+||[M+Na]+||[M+Na]+||[M+Na]+||[M+Na]+||[M+Na]+||[M+Na]+||[M+Na]+||[M+Na]+||[M+Na]+||[M+Na]+||[M+Na]+||[M+Na]+||[M+Na]+||[M+Na]+||[M+H]+||[M+H]+||[M+H]+||[M+H]+||[M+H]+||[M+H]+	PC(18:0/22:4(7Z,10Z,13Z,16Z))||PC(18:2(9Z,12Z)/22:2(13Z,16Z))||PC(18:3(6Z,9Z,12Z)/22:1(11Z))||PC(18:3(6Z,9Z,12Z)/22:1(13Z))||PC(18:3(9Z,12Z,15Z)/22:1(11Z))||PC(18:3(9Z,12Z,15Z)/22:1(13Z))||PC(18:4(6Z,9Z,12Z,15Z)/22:0)||PC(20:0/20:4(5Z,8Z,11Z,14Z))||PC(20:0/20:4(8Z,11Z,14Z,17Z))||PC(20:1(11Z)/20:3(5Z,8Z,11Z))||PC(20:1(11Z)/20:3(8Z,11Z,14Z))||PC(20:2(11E,14E)/20:2(11E,14E))||PC(20:2(11Z,14Z)/20:2(1…	LMGP01010813||LMGP01011638||LMGP01011667||LMGP01012176||LMGP01011696||LMGP01012180||LMGP01011726||LMGP01011023||LMGP01012186||LMGP01012187||LMGP01011826||LMGP01011045||LMGP01011856||LMGP01012203||LMGP01011886||LMGP01011915||LMGP01012213||LMGP01011991||LMGP01012018||LMGP01012019||LMGP01012223||LMGP01012224||LMGP01012048||LMGP01012077||LMGP02011015||LMGP02011127||LMGP01011834||LMGP01011895||LMGP010…	0.29||0.29||0.29||0.29||0.29||0.29||0.29||0.29||0.29||0.29||0.29||0.29||0.29||0.29||0.29||0.29||0.29||0.29||0.29||0.29||0.29||0.29||0.29||0.29||0.29||0.29||-2.51||-2.51||-2.51||-2.51||-2.51||-2.51
862.554	C46H82NO10P||C46H82NO10P||C46H82NO10P||C46H82NO10P||C46H82NO10P||C46H82NO10P||C46H82NO10P||C46H82NO10P||C46H82NO10P||C46H82NO10P||C46H82NO10P||C46H82NO10P||C46H82NO10P||C46H82NO10P||C46H82NO10P	[M+Na]+||[M+Na]+||[M+Na]+||[M+Na]+||[M+Na]+||[M+Na]+||[M+Na]+||[M+Na]+||[M+Na]+||[M+Na]+||[M+Na]+||[M+Na]+||[M+Na]+||[M+Na]+||[M+Na]+	PS(18:0/22:4(7Z,10Z,13Z,16Z))||PS(18:2(9Z,12Z)/22:2(13Z,16Z))||PS(18:3(6Z,9Z,12Z)/22:1(11Z))||PS(18:3(9Z,12Z,15Z)/22:1(11Z))||PS(18:4(6Z,9Z,12Z,15Z)/22:0)||PS(20:0/20:4(5Z,8Z,11Z,14Z))||PS(20:1(11Z)/20:3(8Z,11Z,14Z))||PS(20:2(11Z,14Z)/20:2(11Z,14Z))||PS(20:3(8Z,11Z,14Z)/20:1(11Z))||PS(20:4(5Z,8Z,11Z,14Z)/20:0)||PS(22:0/18:4(6Z,9Z,12Z,15Z))||PS(22:1(11Z)/18:3(6Z,9Z,12Z))||PS(22:1(11Z)/18:3(9Z,12Z,…	LMGP03010883||LMGP03010364||LMGP03010393||LMGP03010421||LMGP03010451||LMGP03010862||LMGP03010549||LMGP03010579||LMGP03010609||LMGP03010638||LMGP03010713||LMGP03010739||LMGP03010740||LMGP03010769||LMGP03010798	-3.14||-3.14||-3.14||-3.14||-3.14||-3.14||-3.14||-3.14||-3.14||-3.14||-3.14||-3.14||-3.14||-3.14||-3.14
862.631	C50H88NO8P||C50H88NO8P||C50H88NO8P||C50H88NO8P||C50H88NO8P||C50H88NO8P||C50H88NO8P||C50H88NO8P||C48H90NO8P||C48H90NO8P||C48H90NO8P||C48H90NO8P||C48H90NO8P||C48H90NO8P||C48H90NO8P||C48H90NO8P||C48H90NO8P||C48H90NO8P||C48H90NO8P||C48H90NO8P||C48H90NO8P||C48H90NO8P||C48H90NO8P||C48H90NO8P||C48H90NO8P||C48H90NO8P||C48H90NO8P||C48H90NO8P	[M+H]+||[M+H]+||[M+H]+||[M+H]+||[M+H]+||[M+H]+||[M+H]+||[M+H]+||[M+Na]+||[M+Na]+||[M+Na]+||[M+Na]+||[M+Na]+||[M+Na]+||[M+Na]+||[M+Na]+||[M+Na]+||[M+Na]+||[M+Na]+||[M+Na]+||[M+Na]+||[M+Na]+||[M+Na]+||[M+Na]+||[M+Na]+||[M+Na]+||[M+Na]+||[M+Na]+	PC(20:0/22:6(4Z,7Z,10Z,13Z,16Z,19Z))||PC(20:2(11Z,14Z)/22:4(7Z,10Z,13Z,16Z))||PC(20:4(5Z,8Z,11Z,14Z)/22:2(13Z,16Z))||PC(20:5(5Z,8Z,11Z,14Z,17Z)/22:1(11Z))||PC(22:1(11Z)/20:5(5Z,8Z,11Z,14Z,17Z))||PC(22:2(13Z,16Z)/20:4(5Z,8Z,11Z,14Z))||PC(22:4(7Z,10Z,13Z,16Z)/20:2(11Z,14Z))||PC(22:6(4Z,7Z,10Z,13Z,16Z,19Z)/20:0)||PC(18:0/22:3(10Z,13Z,16Z))||PC(18:1(11Z)/22:2(13Z,16Z))||PC(18:1(9Z)/22:2(13Z,16Z))||PC…	LMGP01011028||LMGP01011864||LMGP01011923||LMGP01011952||LMGP01012028||LMGP01012058||LMGP01012087||LMGP01012115||LMGP01010812||LMGP01012159||LMGP01011612||LMGP01011637||LMGP01012172||LMGP01011666||LMGP01011695||LMGP01011022||LMGP01012185||LMGP01011799||LMGP01011825||LMGP01011855||LMGP01012202||LMGP01011885||LMGP01011989||LMGP01011990||LMGP01012017||LMGP01012222||LMGP01012230||LMGP01012047	-1.39||-1.39||-1.39||-1.39||-1.39||-1.39||-1.39||-1.39||1.39||1.39||1.39||1.39||1.39||1.39||1.39||1.39||1.39||1.39||1.39||1.39||1.39||1.39||1.39||1.39||1.39||1.39||1.39||1.39
864.57	C46H84NO10P||C46H84NO10P||C46H84NO10P||C46H84NO10P||C46H84NO10P||C46H84NO10P||C46H84NO10P||C46H84NO10P||C46H84NO10P||C46H84NO10P||C46H84NO10P||C46H84NO10P	[M+Na]+||[M+Na]+||[M+Na]+||[M+Na]+||[M+Na]+||[M+Na]+||[M+Na]+||[M+Na]+||[M+Na]+||[M+Na]+||[M+Na]+||[M+Na]+	PS(18:1(9Z)/22:2(13Z,16Z))||PS(18:2(9Z,12Z)/22:1(11Z))||PS(18:3(6Z,9Z,12Z)/22:0)||PS(18:3(9Z,12Z,15Z)/22:0)||PS(20:0/20:3(8Z,11Z,14Z))||PS(20:1(11Z)/20:2(11Z,14Z))||PS(20:2(11Z,14Z)/20:1(11Z))||PS(20:3(8Z,11Z,14Z)/20:0)||PS(22:0/18:3(6Z,9Z,12Z))||PS(22:0/18:3(9Z,12Z,15Z))||PS(22:1(11Z)/18:2(9Z,12Z))||PS(22:2(13Z,16Z)/18:1(9Z))	LMGP03010338||LMGP03010363||LMGP03010392||LMGP03010420||LMGP03010522||LMGP03010548||LMGP03010578||LMGP03010608||LMGP03010711||LMGP03010712||LMGP03010738||LMGP03010768	-3.33||-3.33||-3.33||-3.33||-3.33||-3.33||-3.33||-3.33||-3.33||-3.33||-3.33||-3.33
864.647	C50H90NO8P||C50H90NO8P||C50H90NO8P||C50H90NO8P||C50H90NO8P||C50H90NO8P||C50H90NO8P||C50H90NO8P||C50H90NO8P||C48H92NO8P||C48H92NO8P||C48H92NO8P||C48H92NO8P||C48H92NO8P||C48H92NO8P||C48H92NO8P||C48H92NO8P||C48H92NO8P||C48H92NO8P||C48H92NO8P||C48H92NO8P||C48H92NO8P||C48H92NO8P||C48H92NO8P||C48H92NO8P||C48H92NO8P||C48H92NO8P||C48H92NO8P||C48H92NO8P	[M+H]+||[M+H]+||[M+H]+||[M+H]+||[M+H]+||[M+H]+||[M+H]+||[M+H]+||[M+H]+||[M+Na]+||[M+Na]+||[M+Na]+||[M+Na]+||[M+Na]+||[M+Na]+||[M+Na]+||[M+Na]+||[M+Na]+||[M+Na]+||[M+Na]+||[M+Na]+||[M+Na]+||[M+Na]+||[M+Na]+||[M+Na]+||[M+Na]+||[M+Na]+||[M+Na]+||[M+Na]+	PC(20:0/22:5(7Z,10Z,13Z,16Z,19Z))||PC(20:1(11Z)/22:4(7Z,10Z,13Z,16Z))||PC(20:3(8Z,11Z,14Z)/22:2(13Z,16Z))||PC(20:4(5Z,8Z,11Z,14Z)/22:1(11Z))||PC(20:5(5Z,8Z,11Z,14Z,17Z)/22:0)||PC(22:0/20:5(5Z,8Z,11Z,14Z,17Z))||PC(22:1(11Z)/20:4(5Z,8Z,11Z,14Z))||PC(22:2(13Z,16Z)/20:3(8Z,11Z,14Z))||PC(22:4(7Z,10Z,13Z,16Z)/20:1(11Z))||PC(16:1(9Z)/24:1(15Z))||PC(18:0/22:2(13Z,16Z))||PC(18:1(11Z)/22:1(13Z))||PC(18:1(9…	LMGP01011027||LMGP01011833||LMGP01011894||LMGP01011922||LMGP01011951||LMGP01011998||LMGP01012027||LMGP01012057||LMGP01012086||LMGP01012142||LMGP01011594||LMGP01012158||LMGP01011611||LMGP01012166||LMGP01011636||LMGP01011021||LMGP01011036||LMGP01011038||LMGP01011042||LMGP01011043||LMGP01011854||LMGP01011988||LMGP01012016||LMGP01012220||LMGP01012221||LMGP01012046||LMGP01012239||LMGP02011014||LMGP020…	-0.93||-0.93||-0.93||-0.93||-0.93||-0.93||-0.93||-0.93||-0.93||1.85||1.85||1.85||1.85||1.85||1.85||1.85||1.85||1.85||1.85||1.85||1.85||1.85||1.85||1.85||1.85||1.85||1.85||1.85||1.85
865.573	C47H78NO10P||C47H78NO10P	[M+NH4]+||[M+NH4]+	PS(19:1(9Z)/22:6(4Z,7Z,10Z,13Z,16Z,19Z))||PS(22:6(4Z,7Z,10Z,13Z,16Z,19Z)/19:1(9Z))	LMGP03010510||LMGP03010834	3.3||3.3
866.586	C46H86NO10P||C46H86NO10P||C46H86NO10P||C46H86NO10P||C46H86NO10P||C46H86NO10P||C46H86NO10P||C46H86NO10P||C46H86NO10P	[M+Na]+||[M+Na]+||[M+Na]+||[M+Na]+||[M+Na]+||[M+Na]+||[M+Na]+||[M+Na]+||[M+Na]+	PS(18:0/22:2(13Z,16Z))||PS(18:1(9Z)/22:1(11Z))||PS(18:2(9Z,12Z)/22:0)||PS(20:0/20:2(11Z,14Z))||PS(20:1(11Z)/20:1(11Z))||PS(20:2(11Z,14Z)/20:0)||PS(22:0/18:2(9Z,12Z))||PS(22:1(11Z)/18:1(9Z))||PS(22:2(13Z,16Z)/18:0)	LMGP03010321||LMGP03010337||LMGP03010362||LMGP03010947||LMGP03010860||LMGP03010577||LMGP03010710||LMGP03010737||LMGP03010767	-2.39||-2.39||-2.39||-2.39||-2.39||-2.39||-2.39||-2.39||-2.39
870.521	C47H78NO10P||C47H78NO10P	[M+Na]+||[M+Na]+	PS(19:1(9Z)/22:6(4Z,7Z,10Z,13Z,16Z,19Z))||PS(22:6(4Z,7Z,10Z,13Z,16Z,19Z)/19:1(9Z))	LMGP03010510||LMGP03010834	-4.95||-4.95
870.754	C55H96O6||C55H96O6||C55H96O6||C55H96O6||C55H96O6||C55H96O6||C55H96O6||C55H96O6||C55H96O6||C55H96O6||C55H96O6||C55H96O6||C55H96O6||C55H96O6||C55H96O6||C55H96O6||C55H96O6||C55H96O6||C55H96O6||C55H96O6||C55H96O6||C55H96O6||C55H96O6||C55H96O6||C55H96O6||C55H96O6||C55H96O6||C55H96O6||C55H96O6||C55H96O6||C55H96O6||C55H96O6||C55H96O6||C55H96O6||C55H96O6||C55H96O6||C55H96O6||C55H96O6||C55H96O6||C55H96O6|…	[M+NH4]+||[M+NH4]+||[M+NH4]+||[M+NH4]+||[M+NH4]+||[M+NH4]+||[M+NH4]+||[M+NH4]+||[M+NH4]+||[M+NH4]+||[M+NH4]+||[M+NH4]+||[M+NH4]+||[M+NH4]+||[M+NH4]+||[M+NH4]+||[M+NH4]+||[M+NH4]+||[M+NH4]+||[M+NH4]+||[M+NH4]+||[M+NH4]+||[M+NH4]+||[M+NH4]+||[M+NH4]+||[M+NH4]+||[M+NH4]+||[M+NH4]+||[M+NH4]+||[M+NH4]+||[M+NH4]+||[M+NH4]+||[M+NH4]+||[M+NH4]+||[M+NH4]+||[M+NH4]+||[M+NH4]+||[M+NH4]+||[M+NH4]+||[M+NH4]+|…	TG(12:0/18:0/22:5(7Z,10Z,13Z,16Z,19Z))[iso6]||TG(12:0/18:1(9Z)/22:4(7Z,10Z,13Z,16Z))[iso6]||TG(12:0/18:2(9Z,12Z)/22:3(10Z,13Z,16Z))[iso6]||TG(12:0/18:3(6Z,9Z,12Z)/22:2(13Z,16Z))[iso6]||TG(12:0/18:3(9Z,12Z,15Z)/22:2(13Z,16Z))[iso6]||TG(12:0/18:4(6Z,9Z,12Z,15Z)/22:1(11Z))[iso6]||TG(12:0/20:0/20:5(5Z,8Z,11Z,14Z,17Z))[iso6]||TG(12:0/20:1(11Z)/20:4(5Z,8Z,11Z,14Z))[iso6]||TG(12:0/20:2(11Z,14Z)/20:3(8Z,…	LMGL03013460||LMGL03013479||LMGL03013497||LMGL03013514||LMGL03013531||LMGL03013546||LMGL03013585||LMGL03013596||LMGL03013606||LMGL03013859||LMGL03013881||LMGL03013902||LMGL03014023||LMGL03014036||LMGL03014245||LMGL03014269||LMGL03014353||LMGL03014372||LMGL03014390||LMGL03014407||LMGL03014424||LMGL03014439||LMGL03014650||LMGL03014674||LMGL03014758||LMGL03014777||LMGL03014795||LMGL03014812||LMGL030…	-0.65||-0.65||-0.65||-0.65||-0.65||-0.65||-0.65||-0.65||-0.65||-0.65||-0.65||-0.65||-0.65||-0.65||-0.65||-0.65||-0.65||-0.65||-0.65||-0.65||-0.65||-0.65||-0.65||-0.65||-0.65||-0.65||-0.65||-0.65||-0.65||-0.65||-0.65||-0.65||-0.65||-0.65||-0.65||-0.65||-0.65||-0.65||-0.65||-0.65||-0.65||-0.65||-0.65||-0.65||-0.65||-0.65||-0.65||-0.65||-0.65||-0.65||-0.65||-0.65||-0.65||-0.65||-0.65||-0.65||-0.65||…
872.718	C50H97NO10	[M+H]+	GlcCer(t18:1(8Z)/26:0(2OH[R]))	LMSP05010047	-0.66
874.657	C48H92NO10P||C48H92NO10P||C48H92NO10P||C48H92NO10P||C48H89O10P||C48H89O10P||C48H89O10P||C48H89O10P||C48H89O10P||C48H89O10P	[M+H]+||[M+H]+||[M+H]+||[M+H]+||[M+NH4]+||[M+NH4]+||[M+NH4]+||[M+NH4]+||[M+NH4]+||[M+NH4]+	PS(20:0/22:1(11Z))||PS(20:1(11Z)/22:0)||PS(22:0/20:1(11Z))||PS(22:1(11Z)/20:0)||PG(20:1(11Z)/22:2(13Z,16Z))||PG(20:2(11Z,14Z)/22:1(11Z))||PG(20:3(8Z,11Z,14Z)/22:0)||PG(22:0/20:3(8Z,11Z,14Z))||PG(22:1(11Z)/20:2(11Z,14Z))||PG(22:2(13Z,16Z)/20:1(11Z))	LMGP03010525||LMGP03010553||LMGP03010944||LMGP03010744||LMGP04010555||LMGP04010585||LMGP04010615||LMGP04010718||LMGP04010746||LMGP04010776	3.87||3.87||3.87||3.87||3.87||3.87||3.87||3.87||3.87||3.87
876.456	C42H66O18	[M+NH4]+	thevetin B	LMST01120011	-3.3
876.569	C47H84NO10P||C47H84NO10P||C47H84NO10P||C47H84NO10P	[M+Na]+||[M+Na]+||[M+Na]+||[M+Na]+	PS(19:0/22:4(7Z,10Z,13Z,16Z))||PS(20:4(5Z,8Z,11Z,14Z)/21:0)||PS(21:0/20:4(5Z,8Z,11Z,14Z))||PS(22:4(7Z,10Z,13Z,16Z)/19:0)	LMGP03010478||LMGP03010643||LMGP03010696||LMGP03010804	-3.67||-3.67||-3.67||-3.67
880.59	C45H83O13P||C45H83O13P||C45H83O13P||C45H83O13P||C45H83O13P||C45H83O13P||C45H83O13P||C45H83O13P||C45H83O13P||C45H83O13P||C45H83O13P||C45H83O13P||C45H83O13P||C45H83O13P	[M+NH4]+||[M+NH4]+||[M+NH4]+||[M+NH4]+||[M+NH4]+||[M+NH4]+||[M+NH4]+||[M+NH4]+||[M+NH4]+||[M+NH4]+||[M+NH4]+||[M+NH4]+||[M+NH4]+||[M+NH4]+	PI(14:0/22:2(13Z,16Z))||PI(14:1(9Z)/22:1(11Z))||PI(16:0/20:2(11Z,14Z))||PI(16:1(9Z)/20:1(11Z))||PI(17:1(9Z)/19:1(9Z))||PI(17:2(9Z,12Z)/19:0)||PI(18:0/18:2(9Z,12Z))||PI(18:2(9Z,12Z)/18:0)||PI(19:0/17:2(9Z,12Z))||PI(19:1(9Z)/17:1(9Z))||PI(20:1(11Z)/16:1(9Z))||PI(20:2(11Z,14Z)/16:0)||PI(22:1(11Z)/14:1(9Z))||PI(22:2(13Z,16Z)/14:0)	LMGP06010075||LMGP06010103||LMGP06010165||LMGP06010185||LMGP06010233||LMGP06010262||LMGP06010956||LMGP06010846||LMGP06010429||LMGP06010457||LMGP06010503||LMGP06010532||LMGP06010697||LMGP06010727	-0.66||-0.66||-0.66||-0.66||-0.66||-0.66||-0.66||-0.66||-0.66||-0.66||-0.66||-0.66||-0.66||-0.66
881.721	C56H96O7	[M+H]+	22:2-Glc-Campesterol	LMST01031141	-2.62
882.726	C50H102NO7P	[M+Na]+	PC(O-20:0/22:0)	LMGP01020125	-3.47
884.606	C46H87NO13||C46H87NO13||C46H87NO13	[M+Na]+||[M+Na]+||[M+Na]+	Galalpha1-4Galbeta-Cer(d18:1/16:0)||LacCer(d18:1/16:0)||Manbeta1-4Glcbeta-Cer(d18:1/16:0)	LMSP0509AA01||LMSP0501AB03||LMSP0501AD01	-1.21||-1.21||-1.21
885.546	C45H83O13P||C45H83O13P||C45H83O13P||C45H83O13P||C45H83O13P||C45H83O13P||C45H83O13P||C45H83O13P||C45H83O13P||C45H83O13P||C45H83O13P||C45H83O13P||C45H83O13P||C45H83O13P||C47H81O13P||C47H81O13P||C47H81O13P||C47H81O13P||C47H81O13P||C47H81O13P||C47H81O13P||C47H81O13P||C47H81O13P||C47H81O13P||C47H81O13P||C47H81O13P||C47H81O13P||C47H81O13P	[M+Na]+||[M+Na]+||[M+Na]+||[M+Na]+||[M+Na]+||[M+Na]+||[M+Na]+||[M+Na]+||[M+Na]+||[M+Na]+||[M+Na]+||[M+Na]+||[M+Na]+||[M+Na]+||[M+H]+||[M+H]+||[M+H]+||[M+H]+||[M+H]+||[M+H]+||[M+H]+||[M+H]+||[M+H]+||[M+H]+||[M+H]+||[M+H]+||[M+H]+||[M+H]+	PI(14:0/22:2(13Z,16Z))||PI(14:1(9Z)/22:1(11Z))||PI(16:0/20:2(11Z,14Z))||PI(16:1(9Z)/20:1(11Z))||PI(17:1(9Z)/19:1(9Z))||PI(17:2(9Z,12Z)/19:0)||PI(18:0/18:2(9Z,12Z))||PI(18:2(9Z,12Z)/18:0)||PI(19:0/17:2(9Z,12Z))||PI(19:1(9Z)/17:1(9Z))||PI(20:1(11Z)/16:1(9Z))||PI(20:2(11Z,14Z)/16:0)||PI(22:1(11Z)/14:1(9Z))||PI(22:2(13Z,16Z)/14:0)||PI(16:1(9Z)/22:4(7Z,10Z,13Z,16Z))||PI(18:0/20:5(5Z,8Z,11Z,14Z,17Z))||…	LMGP06010075||LMGP06010103||LMGP06010165||LMGP06010185||LMGP06010233||LMGP06010262||LMGP06010956||LMGP06010846||LMGP06010429||LMGP06010457||LMGP06010503||LMGP06010532||LMGP06010697||LMGP06010727||LMGP06010193||LMGP06010854||LMGP06010849||LMGP06010327||LMGP06010355||LMGP06010383||LMGP06010413||LMGP06010512||LMGP06010540||LMGP06010541||LMGP06010570||LMGP06010599||LMGP06010628||LMGP06010763	-0.65||-0.65||-0.65||-0.65||-0.65||-0.65||-0.65||-0.65||-0.65||-0.65||-0.65||-0.65||-0.65||-0.65||-3.36||-3.36||-3.36||-3.36||-3.36||-3.36||-3.36||-3.36||-3.36||-3.36||-3.36||-3.36||-3.36||-3.36
885.672	C59H90O4	[M+Na]+	Coenzyme Q10	LMPR02010001	-0.75
889.528	C56H72O9	[M+H]+	1,2,3-(8R,9R-epoxy-17E-octadecen-4,6-diynoyl)-sn-glycerol	LMGL03016882	3.31
892.6	C48H88NO10P||C48H88NO10P||C48H88NO10P||C48H88NO10P||C48H88NO10P||C48H88NO10P	[M+Na]+||[M+Na]+||[M+Na]+||[M+Na]+||[M+Na]+||[M+Na]+	PS(20:1(11Z)/22:2(13Z,16Z))||PS(20:2(11Z,14Z)/22:1(11Z))||PS(20:3(8Z,11Z,14Z)/22:0)||PS(22:0/20:3(8Z,11Z,14Z))||PS(22:1(11Z)/20:2(11Z,14Z))||PS(22:2(13Z,16Z)/20:1(11Z))	LMGP03010555||LMGP03010585||LMGP03010615||LMGP03010718||LMGP03010746||LMGP03010776	-4.24||-4.24||-4.24||-4.24||-4.24||-4.24
[truncated: 39 more rows]
